# Supplementary material for: Uncovering Molecular Biomarkers That Correlate Cognitive Decline with the Changes of Hippocampus' Gene Expression Profiles in Alzheimer's Disease
Source: PLoS One. 2010 Apr 13;5(4):e10153. doi: 10.1371/journal.pone.0010153 (PMC2854141; doi:10.1371/journal.pone.0010153)
Supplement: File S2 — Supplementary Data 1. (4.10 MB XLS) [file pone.0010153.s002.xls]

## Sheet: Braak
	ID	SAMPLE	Class	MMSE	NFT	Braak	Blalock et al's IDs
Control	1	GSM21215	0	30	8	1	Control 976	Average MMSE	27.6667
	2	GSM21217	0	26	7	2	Control 1003	Median MMSE	28
	3	GSM21218	0	26	2	2	Control 1008	Average NFT	2.68889
	4	GSM21219	0	26	0.4	4	Control 1012	Median NFT	1.3
	5	GSM21220	0	29	0.4	1	Control 1015	Average Braak	1.88889
	6	GSM21221	0	29	4.8	3	Control 1018	Median Braak	2
	7	GSM21226	0	28	0	1	Control 1030
	8	GSM21231	0	28	0.3	1	Control 1039
	9	GSM21232	0	27	1.3	2	Control 1040
Incipient AD	10	GSM21204	1	25	65.8	5	Incipient 715	Average MMSE	24.2857
	11	GSM21205	1	29	12	6	Incipient 720	Median MMSE	25
	12	GSM21216	1	26	6.4	5	Incipient 994	Average NFT	17.4714
	13	GSM21222	1	24	5.5	6	Incipient 1019	Median NFT	8
	14	GSM21225	1	25	7.2	3	Incipient 1029	Average Braak	5
	15	GSM21228	1	20	17.4	5	Incipient 1034	Median Braak	5
	16	GSM21233	1	21	8	5	Incipient 1043
Moderate AD	17	GSM21209	2	18	35.2	6	Moderate 826	Average MMSE	16.5
	18	GSM21210	2	15	19	5	Moderate 832	Median MMSE	17
	19	GSM21211	2	17	42	5	Moderate 856	Average NFT	25.6125
	20	GSM21214	2	18	22	5	Moderate 965	Median NFT	24.25
	21	GSM21223	2	18	15.8	6	Moderate 1020	Average Braak	5.625
	22	GSM21224	2	17	30.6	6	Moderate 1025	Median Braak	6
	23	GSM21227	2	15	13.8	6	Moderate 1031
	24	GSM21230	2	14	26.5	6	Moderate 1037
Severe AD	25	GSM21203	3	4	21	6	Severe 701	Average MMSE	6
	26	GSM21206	3	5	58.2	6	Severe 723	Median MMSE	5
	27	GSM21207	3	11	62.5	6	Severe 807	Average NFT	6
	28	GSM21208	3	11	18.5	6	Severe 819	Median NFT	5
	29	GSM21212	3	2	22.6	5	Severe 867	Average Braak	5.85714
	30	GSM21213	3	2	24.6	6	Severe 872	Median Braak	6
	31	GSM21229	3	7	21.5	6	Severe 1036
		GSM21215	GSM21221	GSM21216	GSM21218	GSM21217	GSM21233	GSM21220	GSM21214	GSM21210	GSM21222	GSM21231	GSM21225	GSM21229	GSM21219	GSM21204	GSM21224	GSM21226	GSM21232	GSM21228	GSM21208	GSM21223	GSM21209	GSM21211	GSM21227	GSM21206	GSM21205	GSM21203	GSM21230	GSM21213	GSM21212	GSM21207
Braak		3	3	5	2	2	5	1	5	6	6	1	3	6	4	5	6	1	2	5	6	6	6	6	6	6	6	6	6	6	5	6
		976	1018	994	1008	1003	1043	1015	965	832	1019	1039	1029	1036	1012	715	1025	1030	1040	1034	819	1020	826	856	1031	723	720	701	1037	872	867	807

## Sheet: 50GENES_ORD_ECL-3
																																											Class	0	0	1	0	0	1
Probe	Gene Symbol		0	0	1	0	0	1	0	2	2	1	0	1	3	0	1	2	0	0	1	3	2	2	2	2	3	1	3	2	3	3	3		Transcription factors								Sample label	GSM21215	GSM21221	GSM21216	GSM21218	GSM21217	GSM21233
																																			EVI1_04	TCF1P_Q6	V$SMAD4_Q6	V$ACAAT_B	V$HNF1_C		Groups		Probe ID
211307_s_at	FCAR																																		1	1	0	0	0		2		211307_s_at	9.2	2.7	2.8	3.6	3	4.1
205383_s_at	ZBTB20																																		1	1	1	1	1		2		205383_s_at	2845.3	1870.3	2353.2	1263	3964	1589.1
201125_s_at	ITGB5																																		1	1	0	0	1		2		201125_s_at	480	422.1	299.5	328.6	523.6	621.7
214150_x_at	ATP6V0E1																																		0	1	0	0	1		2		214150_x_at	2207.6	2349.3	2441.9	1740	2857.2	3356.9
201412_at	LRP10																																		1	1	0	0	1		2		201412_at	614.7	553.5	651.6	515.7	689.5	640.1
219167_at	RASL12																																		1	1	0	1	1		2		219167_at	286.4	512.7	795.5	322.6	506.6	539.6
214393_at	RND2																																		0	0	0	0	0		2		214393_at	14.4	52	82.8	82	158.9	73.8
202724_s_at	FOXO1																																		0	1	0	0	0		2		202724_s_at	328.2	297	322.1	468.1	410.3	372
202656_s_at	SERTAD2																																		1	0	1	0	0		2		202656_s_at	324.2	307.9	394.7	401.1	404.9	362
201681_s_at	DLG5																																		1	1	1	0	1		2		201681_s_at	326.3	255	355.6	475.9	406.3	423.3
38037_at	HBEGF																																		1	0	1	0	0		2		38037_at	134.6	144.7	128.9	214.8	171.4	148.3
218204_s_at	FYCO1																																		1	1	0	1	1		2		218204_s_at	85.4	107.4	150.7	183.8	180.2	165.3
211839_s_at	CSF1																																		1	1	1	0	1		2		211839_s_at	14.2	9.2	19.6	16.4	16.1	16
214057_at	MCL1																																		0	1	0	0	1		2		214057_at	176.3	130.4	176.2	185.7	229.1	234.4
208195_at	TTN																																		1	1	0	1	1		2		208195_at	124	104.7	89.7	126.4	156.1	143.4
55662_at	C10orf76																																		0	0	1	0	1		2		55662_at	174.6	167.8	202.9	194.8	290.1	200.6
217367_s_at	ZHX3																																		1	0	0	0	0		2		217367_s_at	429.6	344.9	431.3	519.3	669.4	516.1
212899_at	CDC2L6																																		1	1	0	1	0		2		212899_at	1818.8	1499.1	1238.7	1612.9	2175.7	1660.3
219145_at	LPHN1																																		1	1	0	0	0		1		219145_at	1093.5	1168.9	1027.6	1053.3	992.3	992.3
215161_at	CAMK1G																																		1	1	1	0	1		1		215161_at	543.9	932	809.5	432.6	1031	224.5
206384_at	CACNG3																																		1	1	1	0	0		1		206384_at	1391.4	3151.3	3620.4	1565.3	2152.9	1622.3
218888_s_at	NETO2																																		1	1	1	0	0		1		218888_s_at	1017.1	909.4	956.4	541.1	491.7	425.9
220615_s_at	FAR2																																		1	1	0	0	1		1		220615_s_at	383.5	572.8	433.4	349.6	447.6	352.2
219497_s_at	BCL11A																																		1	1	0	0	0		1		219497_s_at	1090.9	703.7	764.1	797.2	1244	604.5
202457_s_at	PPP3CA																																		1	1	1	0	1		1		202457_s_at	9087.2	8896.7	10808	6914.8	15544.3	5574
210016_at	MYT1L																																		1	0	1	0	0		1		210016_at	5954	4830.4	5443.8	4708.4	5504.2	3359.5
213222_at	PLCB1																																		1	1	0	0	0		1		213222_at	6764.2	6429.7	5668.4	6091.1	6739.5	5513.3
204072_s_at	FRY																																		1	1	1	0	1		1		204072_s_at	1968.6	1655.8	1769.7	1422	2002.4	1322.8
219736_at	TRIM36																																		1	1	1	0	0		1		219736_at	1827.9	1326.9	1400	810.6	2010.3	1018.9
205551_at	SV2B																																		1	1	1	0	0		1		205551_at	5107.8	5223.4	4255.1	5498.7	5761.9	4920.8
213967_at	RALYL																																		1	1	0	0	0		1		213967_at	2654.8	1831.9	2236.4	2432.8	1979.3	2559.6
205113_at	NEFM																																		1	1	1	0	0		1		205113_at	6612.8	6570.1	5339.9	4230.7	5939.6	9298.2
206481_s_at	LDB2																																		1	1	1	0	0		1		206481_s_at	3270.6	2504.4	2190.1	3336.6	1321.8	1674.3
221805_at	NEFL																																		1	1	1	0	0		1		221805_at	10007.6	6922.8	5259.2	7529.7	4129.9	5687.7
203798_s_at	VSNL1																																		1	1	0	0	0		1		203798_s_at	1958.4	1814.4	1147.3	3151.1	528.8	1189.9
209915_s_at	NRXN1																																		1	1	1	0	0		1		209915_s_at	855	800.4	691.8	985.5	501.1	486.8
212214_at	OPA1																																		0	0	1	0	0		1		212214_at	1709.4	1413.2	1272.8	1461.3	1299.4	1478.4
213197_at	ASTN1																																		1	1	1	0	1		1		213197_at	1975.6	2162.2	2318.4	2528.7	1862.6	1172.6
209481_at	SNRK																																		0	1	0	0	0		1		209481_at	2226.6	1733.3	1677.8	1408.8	1831.1	1399.6
202941_at	NDUFV2																																		1	1	1	0	1		1		202941_at	1624.4	2001.9	1464	1590.6	1251.2	1568.1
213366_x_at	ATP5C1																																		1	1	1	0	1		1		213366_x_at	6093	5392	5029.3	4200.2	4567	4342.5
205711_x_at	ATP5C1																																		1	1	1	0	1		1		205711_x_at	4576.3	4363.6	3860.7	3273.9	3895.5	3503.4
211765_x_at	PPIA																																		1	1	0	0	0		1		211765_x_at	14905.9	15614.8	15293.4	13810.4	11831.8	13781
211978_x_at	AI708767																																		0	0	0	0	0		1		211978_x_at	16278.9	18491.2	16100.2	15873.8	13902	15760.5
200650_s_at	LDHA																																		1	0	1	0	0		1		200650_s_at	6240	6385.5	7256.3	6385.4	5413.8	6962.2
205352_at	SERPINI1																																		1	1	0	0	0		1		205352_at	5449.1	4494.2	4379.4	6535.1	3706.9	4011.5
203340_s_at	SLC25A12																																		1	1	0	0	1		1		203340_s_at	932.8	870.2	609.8	1440.1	733.1	777.4
200925_at	COX6A1																																		1	0	1	0	0		1		200925_at	12036.1	15778.3	13314.2	11730.8	13623.7	17268.1
218456_at	CAPRIN2																																		1	1	1	0	0		1		218456_at	1558.3	1719.5	1421.8	2113.5	1473.2	1990.1
204743_at	TAGLN3																																		1	1	1	0	0		1		204743_at	2320.3	5074.7	3158.6	4528.5	2339	4027.1
[truncated: 25 more columns]

## Sheet: Jensen-Shannon
	ID	SAMPLE	Class	MMSE	NFT	JSD(P,Pc)	JSD(P,Ps)		sqrt(JSD(P,Pc))	sqrt(JSD(P,Ps))
Control	1	GSM21215	0	30	8	0.0111685	0.0538096		0.105681	0.231969
	2	GSM21217	0	26	7	0.0128459	0.0430581		0.11334	0.207504
	3	GSM21218	0	26	2	0.0109168	0.0487106		0.104483	0.220705
	4	GSM21219	0	26	0.4	0.00899459	0.0188264		0.0948398	0.137209
	5	GSM21220	0	29	0.4	0.00383023	0.0311612		0.0618889	0.176525
	6	GSM21221	0	29	4.8	0.00755991	0.0499723		0.0869477	0.223545
	7	GSM21226	0	28	0	0.0102269	0.0178833		0.101128	0.133728
	8	GSM21231	0	28	0.3	0.00961863	0.026443		0.0980746	0.162613
	9	GSM21232	0	27	1.3	0.00900832	0.0190455		0.0949122	0.138005
Incipient AD	10	GSM21204	1	25	65.8	0.0157151	0.0192232		0.12536	0.138648
	11	GSM21205	1	29	12	0.0365784	0.0243606		0.191255	0.156079
	12	GSM21216	1	26	6.4	0.0077775	0.0431004		0.0881901	0.207606
	13	GSM21222	1	24	5.5	0.00943188	0.0271863		0.0971179	0.164883
	14	GSM21225	1	25	7.2	0.0122779	0.023212		0.110806	0.152355
	15	GSM21228	1	20	17.4	0.0161874	0.0180138		0.12723	0.134215
	16	GSM21233	1	21	8	0.0111706	0.0359273		0.105691	0.189545
Moderate AD	17	GSM21209	2	18	35.2	0.0227461	0.0152766		0.150818	0.123599
	18	GSM21210	2	15	19	0.00737898	0.0258483		0.085901	0.160774
	19	GSM21211	2	17	42	0.020685	0.015108		0.143823	0.122915
	20	GSM21214	2	18	22	0.00915235	0.0309248		0.0956679	0.175854
	21	GSM21223	2	18	15.8	0.0161402	0.0170995		0.127044	0.130765
	22	GSM21224	2	17	30.6	0.0225603	0.0194296		0.150201	0.13939
	23	GSM21227	2	15	13.8	0.0177847	0.0162959		0.133359	0.127655
	24	GSM21230	2	14	26.5	0.0355034	0.0191628		0.188423	0.13843
Severe AD	25	GSM21203	3	4	21	0.0321599	0.00638063		0.179332	0.0798788
	26	GSM21206	3	5	58.2	0.0275895	0.0115579		0.166101	0.107508
	27	GSM21207	3	11	62.5	0.0773785	0.0269031		0.27817	0.164022
	28	GSM21208	3	11	18.5	0.0248312	0.0131289		0.157579	0.114581
	29	GSM21212	3	2	22.6	0.0480154	0.00844811		0.219124	0.0919136
	30	GSM21213	3	2	24.6	0.0434648	0.00757604		0.208482	0.0870405
	31	GSM21229	3	7	21.5	0.0201138	0.0178679		0.141823	0.133671

## Sheet: correlation Analysis
Gene Symbol	Probes	d(sqrtJSD(P,PC)	d(sqrtJSD(P,Ps)	Distance	Ranking
LDB2	206481_s_at	-0.79879	0.74274	1.09075	1
TRIM36	219736_at	-0.80766	0.72419	1.08479	2
LDHA	200650_s_at	-0.82097	0.69839	1.07784	3
NEFM	205113_at	-0.74476	0.77419	1.07426	4
SERTAD2	202656_s_at	0.73427	-0.78266	1.07318	5
VSNL1	203798_s_at	-0.70927	0.79234	1.06342	6
SERPINI1	205352_at	-0.74315	0.7496	1.05554	7
ZHX3	217367_s_at	0.76774	-0.7129	1.04769	8
NRXN1	209915_s_at	-0.72823	0.7496	1.04509	9
NEFL	221805_at	-0.71532	0.75524	1.04023	10
ATP5C1	213366_x_at	-0.73024	0.73266	1.03443	11
SLC25A12	203340_s_at	-0.71411	0.74435	1.03151	12
RALYL	213967_at	-0.67863	0.77581	1.03074	13
CAMK1G	215161_at	-0.78185	0.66815	1.02845	14
FYCO1	218204_s_at	0.725	-0.72218	1.02331	15
LOC100131599	213222_at	-0.76935	0.67379	1.02269	16
COX6A1	200925_at	-0.75323	0.68831	1.02036	17
HBEGF	38037_at	0.72218	-0.71935	1.01932	18
SNRK	209481_at	-0.70484	0.73306	1.01694	19
LRP10	201412_at	0.69637	-0.73992	1.01608	20
NDUFV2	202941_at	-0.69839	0.7379	1.01599	21
ZBTB20	205383_s_at	0.67742	-0.75685	1.01574	22
CACNG3	206384_at	-0.77782	0.65161	1.01469	23
NETO2	218888_s_at	-0.78992	0.6246	1.00702	24
OPA1	212214_at	-0.71935	0.70242	1.00541	25
CAPRIN2	218456_at	-0.79153	0.61855	1.00455	26
FCAR	211307_s_at	0.72974	-0.68861	1.00335	27
FOXO1	202724_s_at	0.6875	-0.72702	1.00061	28
LPHN1	219145_at	-0.72933	0.68256	0.998905	29
ATP5C1	205711_x_at	-0.71532	0.69677	0.998585	30
C10orf76	55662_at	0.76321	-0.64204	0.997349	31
AI708767	211978_x_at	-0.73629	0.67258	0.99724	32
MYT1L	210016_at	-0.75766	0.63952	0.991481	33
FRY	204072_s_at	-0.74556	0.65121	0.989916	34
BCL11A	219497_s_at	-0.68427	0.71169	0.987283	35
ITGB5	201125_s_at	0.73226	-0.66129	0.986666	36
PPIA	211765_x_at	-0.72298	0.67137	0.986629	37
MCL1	214057_at	0.77218	-0.61371	0.986358	38
CSF1	211839_s_at	0.812	-0.55897	0.985795	39
SV2B	205551_at	-0.69153	0.70081	0.984555	40
RASL12	219167_at	0.62258	-0.76048	0.98282	41
RND2	214393_at	0.70514	-0.67994	0.979562	42
CDC2L6	212899_at	0.73185	-0.6504	0.979094	43
FAR2	220615_s_at	-0.66653	0.71492	0.977432	44
DLG5	201681_s_at	0.70927	-0.67056	0.976071	45
TTN	208195_at	0.71734	-0.66169	0.975915	46
PPP3CA	202457_s_at	-0.76613	0.60161	0.97411	47
ATP6V0E1	214150_x_at	0.62298	-0.74879	0.974059	48
TAGLN3	204743_at	-0.69516	0.68024	0.972612	49
ASTN1	213197_at	-0.70685	0.66734	0.972101	50
PPP2CA	208652_at	-0.70444	0.66774	0.970625	51
PBX1	212148_at	-0.68911	0.68145	0.969147	52
BE731738	212661_x_at	-0.70121	0.66774	0.968283	53
COX4I1	202698_x_at	-0.75565	0.60444	0.967654	54
DDX1	201241_at	-0.70887	0.65766	0.966961	55
KIAA0528	212943_at	-0.73669	0.62298	0.964788	56
AL359052	214927_at	0.65524	-0.70726	0.964135	57
C6orf145	212923_s_at	0.65	-0.71048	0.962955	58
TBL1X	213400_s_at	0.65927	-0.70081	0.96217	59
37681	213256_at	0.64556	-0.71169	0.960859	60
C3orf14	219288_at	-0.68427	0.67339	0.960041	61
COX7AP2	217249_x_at	-0.71976	0.63508	0.959886	62
TMSB10	217733_s_at	-0.70685	0.64839	0.959191	63
ATP6V1D	208898_at	-0.72944	0.62258	0.959004	64
NM_018612	220882_at	0.65524	-0.7	0.958822	65
TUBD1	210389_x_at	0.74476	-0.60363	0.958664	66
AFF1	201924_at	0.575	-0.76694	0.958552	67
ADD3	201753_s_at	0.60968	-0.7371	0.95657	68
KIAA0368	212428_at	-0.74798	0.59435	0.955367	69
COX6B1	201441_at	-0.70766	0.63992	0.954086	70
ITGB8	205816_at	0.62621	-0.71976	0.954041	71
LZTS1	219042_at	-0.71411	0.62702	0.95032	72
RBM19	205115_s_at	0.59395	-0.74073	0.949451	73
TNS1	221748_s_at	0.70323	-0.6375	0.949178	74
PSMC3IP	205956_x_at	0.76855	-0.55685	0.949079	75
FKBP3	218003_s_at	-0.64244	0.69849	0.949009	76
BAI3	205638_at	-0.70403	0.63629	0.948959	77
MAN1A1	221760_at	-0.78185	0.5371	0.94856	78
DOPEY1	213271_s_at	-0.60444	0.73024	0.947944	79
AL049443	215306_at	0.59839	-0.73508	0.947847	80
TUG1	222244_s_at	0.70806	-0.62903	0.947115	81
AW974666	222365_at	0.60726	-0.72661	0.946957	82
PKP4	214874_at	-0.66734	0.67177	0.946899	83
KLHL20	204177_s_at	0.71855	-0.61613	0.946536	84
PIP4K2C	218942_at	-0.65968	0.67742	0.945556	85
JOSD3	221580_s_at	-0.66774	0.66815	0.944617	86
TIMM23	218118_s_at	-0.70323	0.62903	0.94351	87
KIAA0319	206017_at	-0.60645	0.71774	0.939645	88
PAX6	205646_s_at	0.67742	-0.65081	0.939389	89
KCNK5	219615_s_at	0.71815	-0.60524	0.939178	90
GABBR2	209990_s_at	-0.71008	0.61331	0.938276	91
CSPG5	205344_at	-0.74889	0.56421	0.93764	92
UQCRQ	201568_at	-0.64234	0.68266	0.93735	93
BBS7	219688_at	-0.6996	0.62298	0.936773	94
CTBP2	210835_s_at	0.70121	-0.62056	0.936371	95
NDUFB8	201226_at	-0.71774	0.59274	0.930855	96
PCSK2	204870_s_at	-0.72782	0.57944	0.930308	97
YES1	202933_s_at	0.6504	-0.66331	0.928978	98
COX7C	213846_at	-0.70121	0.60524	0.926289	99
CFLAR	214486_x_at	0.67944	-0.62782	0.925093	100
PPP3R1	204506_at	-0.74839	0.54194	0.924006	101
PRKAR2B	203680_at	-0.66089	0.64556	0.923863	102
STAG3L1	221191_at	0.69194	-0.6121	0.923822	103
PPP2R2B	213849_s_at	-0.6125	0.69153	0.92378	104
NM_024849	220531_at	0.64879	-0.65665	0.923102	105
ATP2B2	204685_s_at	-0.59516	0.70403	0.921886	106
AL050204	213929_at	0.69355	-0.60645	0.9213	107
NRG1	206343_s_at	-0.49113	0.77823	0.920245	108
YWHAZ	200639_s_at	-0.6754	0.62258	0.91857	109
LETMD1	207170_s_at	-0.58266	0.70927	0.917909	110
ZNF669	220215_at	0.68468	-0.61129	0.917857	111
COX4I1	200086_s_at	-0.69516	0.59919	0.917756	112
CD200	209582_s_at	-0.61089	0.68347	0.916689	113
STAT5A	203010_at	0.62944	-0.66452	0.915304	114
INA	204465_s_at	-0.62056	0.67258	0.915128	115
BE138647	214314_s_at	0.67621	-0.61613	0.914809	116
RNF11	208924_at	-0.64274	0.65081	0.914696	117
FAM107A	209074_s_at	0.6625	-0.63024	0.91439	118
ATP5H	210149_s_at	-0.63831	0.65444	0.914183	119
TUBG2	203894_at	-0.63105	0.66008	0.913198	120
SLC12A5	210040_at	-0.66935	0.62097	0.913035	121
ATP2B4	212135_s_at	-0.65282	0.6375	0.912458	122
HIST1H1C	209398_at	0.59194	-0.69395	0.912118	123
TRIP6	209129_at	0.66613	-0.62298	0.912049	124
ZNF500	213641_at	0.71411	-0.56734	0.912046	125
PTTG1IP	200677_at	0.47339	-0.77782	0.91055	126
SRD5A1	211056_s_at	-0.65726	0.62944	0.910047	127
NM_024723	219332_at	0.66734	-0.61734	0.909094	128
AV712577	201305_x_at	0.63831	-0.64718	0.909	129
KCND2	207103_at	-0.67218	0.60766	0.906133	130
RGS7	206290_s_at	-0.70524	0.56855	0.905877	131
CALM3	200622_x_at	-0.58306	0.69153	0.904529	132
DYNC2LI1	203762_s_at	-0.64637	0.63145	0.903617	133
CYP26B1	219825_at	-0.70927	0.55645	0.901499	134
FXYD6	217897_at	-0.65605	0.61734	0.900839	135
CHD2	203461_at	0.71744	-0.54325	0.899912	136
GLOD4	209092_s_at	-0.64355	0.62863	0.899629	137
MYBL1	213906_at	0.65565	-0.61573	0.899444	138
SORBS2	204288_s_at	-0.66613	0.60323	0.898674	139
EFNB2	202668_at	-0.65927	0.60968	0.897968	140
C3orf63	209285_s_at	0.57016	-0.69355	0.897827	141
KPNA2	201088_at	-0.72379	0.52903	0.896518	142
KIR2DL5A	211410_x_at	0.69375	-0.56573	0.895176	143
IL10RA	204912_at	0.65444	-0.60968	0.894428	144
ACCN1	206690_at	-0.58629	0.675	0.89407	145
RP11-336K24.9	218291_at	-0.6875	0.56976	0.892907	146
ZMYND8	214795_at	0.60685	-0.65484	0.892795	147
SORCS3	215522_at	-0.66734	0.59234	0.892306	148
NUCKS1	217802_s_at	0.67177	-0.58669	0.891897	149
ISCA1	209274_s_at	-0.66169	0.59798	0.89186	150
ENSA	202596_at	-0.55565	0.69597	0.890574	151
RRP1B	212846_at	0.62177	-0.6375	0.890508	152
RIMS2	206137_at	-0.69476	0.55645	0.890128	153
KRCC1	218303_x_at	0.52298	-0.71976	0.889698	154
ETV1	221911_at	-0.64435	0.61129	0.888179	155
TLE3	212769_at	0.63518	-0.62006	0.887653	156
SEPT6	213666_at	-0.63992	0.61452	0.887205	157
C21orf2	203993_x_at	0.62298	-0.63105	0.886751	158
RNF19A	220483_s_at	0.73145	-0.50121	0.886696	159
GOT2	200708_at	-0.68468	0.56331	0.886626	160
SATB2	213435_at	-0.6504	0.60161	0.885977	161
QKI	212636_at	0.63871	-0.61371	0.885771	162
UPF1	211168_s_at	0.68065	-0.56653	0.885574	163
GRM5	214217_at	-0.59113	0.65887	0.88518	164
UGCGL2	218801_at	-0.73548	0.49073	0.884164	165
DHFR	202534_x_at	0.71421	-0.51966	0.883257	166
GTF2A1L	213413_at	0.52581	-0.70927	0.882916	167
BE568134	214581_x_at	-0.65323	0.59395	0.882885	168
GPM6A	209470_s_at	-0.64194	0.60524	0.882271	169
SLC12A7	218066_at	0.68589	-0.55484	0.882209	170
BG251521	213156_at	0.51169	-0.71815	0.881797	171
AL049242	216101_at	0.62944	-0.61653	0.881081	172
U43279	211606_at	0.62823	-0.61734	0.880785	173
FLNC	207876_s_at	0.6496	-0.59355	0.879933	174
DZIP1	204557_s_at	-0.68992	0.54395	0.878562	175
CYLC1	216809_at	0.65171	-0.58821	0.877905	176
WASF1	204165_at	-0.70766	0.51895	0.877549	177
C5orf4	48031_r_at	0.69516	-0.53548	0.877489	178
ATRN	212517_at	-0.56774	0.66855	0.877091	179
PAK4	203154_s_at	0.66532	-0.57097	0.876731	180
SYNGR3	205691_at	-0.62339	0.61573	0.876207	181
FAM65B	209829_at	-0.66734	0.56734	0.875909	182
PLCE1	214159_at	0.60938	-0.62893	0.875727	183
AL162044	216707_at	0.6499	-0.58458	0.87413	184
FLJ23172	217016_x_at	0.63145	-0.60363	0.873555	185
MRPL16	217980_s_at	-0.62339	0.61048	0.872526	186
ARF3	200734_s_at	-0.63589	0.59476	0.870687	187
TMEM149	219690_at	0.65968	-0.56613	0.869299	188
RGS4	204339_s_at	-0.55121	0.67218	0.869286	189
SHANK2	213308_at	-0.66089	0.56371	0.868645	190
CRYM	205489_at	-0.54879	0.67137	0.867126	191
PLCL2	213309_at	-0.60806	0.61653	0.865937	192
ATXN3L	216539_at	0.65685	-0.56371	0.865575	193
KIAA1467	213234_at	-0.57903	0.64234	0.864798	194
USP25	220419_s_at	-0.58468	0.63468	0.862942	195
GABBR1	203146_s_at	-0.66452	0.5504	0.86286	196
ITPR1	203710_at	-0.6129	0.60685	0.862504	197
NDUFA10	217860_at	-0.6629	0.55161	0.862386	198
AGPAT7	40472_at	-0.62581	0.59315	0.862244	199
PAPSS1	209043_at	-0.64798	0.56855	0.862048	200
AU150728	219540_at	0.54355	-0.66774	0.861001	201
MET	203510_at	-0.63387	0.58266	0.860978	202
DIMT1L	210802_s_at	-0.55605	0.65685	0.860606	203
ZC3H15	201595_s_at	-0.6121	0.60484	0.860522	204
PTPRN2	203030_s_at	-0.63831	0.57581	0.859649	205
CNOT6	217970_s_at	0.55766	-0.65403	0.8595	206
PTMS	218044_x_at	0.63669	-0.57702	0.859259	207
SASH1	213236_at	0.54476	-0.66331	0.858338	208
U96291	211146_at	0.63942	-0.57228	0.858116	209
NM_005758	206809_s_at	-0.60081	0.61129	0.857116	210
JRK	37872_at	0.6504	-0.55524	0.855168	211
ADCY2	217687_at	0.6746	-0.52339	0.853828	212
MDFIC	211675_s_at	0.57056	-0.63508	0.853736	213
CYBRD1	217889_s_at	0.65605	-0.54556	0.853251	214
CDK7	211297_s_at	-0.68306	0.51129	0.853222	215
BCL2	203685_at	0.55675	-0.64506	0.852099	216
TMEM16C	215241_at	-0.60161	0.60081	0.85024	217
MTF1	205323_s_at	0.59879	-0.60242	0.849388	218
HERC1	218306_s_at	-0.70081	0.47863	0.848659	219
SLIT2	209897_s_at	-0.63347	0.56411	0.848236	220
EPB49	204505_s_at	-0.59597	0.60242	0.847402	221
M37712	210473_s_at	0.52056	-0.66815	0.846999	222
AKAP12	210517_s_at	-0.60121	0.59556	0.846254	223
ZBTB20	222357_at	0.56855	-0.62661	0.846102	224
GRPEL1	212434_at	-0.64274	0.5496	0.84568	225
ZNHIT3	212544_at	-0.61129	0.58427	0.845604	226
SUPT7L	201837_s_at	-0.69032	0.48831	0.84557	227
PSD3	203354_s_at	-0.63226	0.56129	0.845458	228
TSPAN9	205665_at	0.51663	-0.66905	0.845301	229
SCFD1	215548_s_at	-0.53831	0.65161	0.845206	230
ATP2B1	212930_at	-0.6496	0.54073	0.845204	231
PDHA1	200980_s_at	-0.6129	0.58185	0.845101	232
C6orf62	208809_s_at	0.57379	-0.61935	0.844292	233
CD68	203507_at	0.54032	-0.64798	0.843696	234
KIAA1648	213058_at	0.57782	-0.61371	0.842921	235
TXNDC9	211758_x_at	-0.61976	0.57056	0.842402	236
DYNC1H1	211928_at	-0.63548	0.55242	0.842023	237
AP3S1	202442_at	-0.63508	0.55242	0.841721	238
NT5DC1	212928_at	-0.64597	0.53952	0.841641	239
MKS1	218630_at	0.60887	-0.58065	0.841354	240
EHD1	208112_x_at	0.64879	-0.53508	0.840975	241
NDUFA3	218563_at	-0.64315	0.54113	0.840514	242
ARF5	201526_at	-0.50685	0.67016	0.840245	243
GNAS	211858_x_at	-0.65565	0.525	0.839942	244
SEC14L2	204541_at	0.62258	-0.56371	0.839866	245
SEC31A	200945_s_at	-0.71008	0.44839	0.839802	246
P53AIP1	220402_at	0.68296	-0.48861	0.839746	247
SLC6A1	205152_at	-0.6	0.5871	0.839456	248
NUFIP1	205136_s_at	-0.64839	0.53226	0.838874	249
BF431965	213567_at	0.50242	-0.67177	0.838869	250
ATR	209902_at	-0.59919	0.58669	0.83859	251
PPP1R12B	201958_s_at	0.64083	-0.54062	0.838411	252
TCTE1P	204869_at	-0.57056	0.61371	0.837961	253
FTL	212788_x_at	0.65363	-0.52339	0.837359	254
PTAFR	206278_at	0.5747	-0.60877	0.837186	255
MMP11	203876_s_at	0.68145	-0.48306	0.835297	256
CPT2	204264_at	0.43589	-0.7125	0.835258	257
AV727634	213683_at	-0.61855	0.56008	0.834442	258
N58524	222332_at	0.70766	-0.44153	0.834105	259
SLC4A3	205918_at	-0.67056	0.49476	0.83333	260
NBPF12	213612_x_at	0.48024	-0.68024	0.832681	261
SACS	213262_at	-0.56815	0.60766	0.831892	262
B4GALT6	206233_at	-0.58306	0.59315	0.831737	263
TMBIM1	217730_at	0.57782	-0.59758	0.831251	264
LOC645961	215320_at	0.60716	-0.56744	0.831042	265
RPS24P2	217188_s_at	-0.68427	0.47137	0.830912	266
PRKCI	213518_at	-0.5625	0.61089	0.830417	267
SLC33A1	203164_at	0.42863	-0.71089	0.830113	268
FOLH1	217483_at	0.50685	-0.65726	0.829993	269
ENTPD3	206191_at	-0.55202	0.61895	0.829352	270
FBXO3	218432_at	-0.55202	0.61895	0.829352	271
DMN	212730_at	0.49758	-0.66331	0.829196	272
PDCD4	212594_at	0.65444	-0.50887	0.829	273
DDAH2	202262_x_at	0.58548	-0.58669	0.82885	274
GSTA3	222102_at	0.58458	-0.58659	0.828143	275
ITPK1	210197_at	0.54637	-0.62218	0.828027	276
CREBZF	202977_s_at	0.6497	-0.5124	0.827444	277
TNFRSF11B	204932_at	0.57016	-0.5996	0.827407	278
KPNA3	221502_at	-0.63065	0.53508	0.827061	279
PRKD2	38269_at	0.60887	-0.55927	0.826744	280
TSPO	202096_s_at	0.37944	-0.73387	0.82616	281
KIF13B	202962_at	0.55968	-0.60565	0.824654	282
M78162	217536_x_at	0.68145	-0.46331	0.824033	283
SOX2	213721_at	0.63387	-0.52621	0.823825	284
GALNT10	212256_at	0.56573	-0.59879	0.823772	285
AW242701	213411_at	-0.625	0.53589	0.823288	286
RTN1	203485_at	-0.59315	0.57056	0.823022	287
ADARB2	220648_at	0.48387	-0.66492	0.822343	288
TGFBR3	204731_at	0.40202	-0.71653	0.821605	289
MTHFD1	202309_at	-0.59355	0.56774	0.821359	290
ARG2	203945_at	0.57026	-0.59103	0.821287	291
IL9R	214950_at	0.60282	-0.55766	0.821204	292
N25732	204131_s_at	0.62823	-0.5254	0.818974	293
FAIM2	203619_s_at	-0.69677	0.42823	0.817844	294
ZBTB7C	217675_at	0.64637	-0.5004	0.817432	295
FAM114A1	213455_at	0.46573	-0.67177	0.817422	296
FTH1	214211_at	0.55565	-0.59919	0.817175	297
SUPT4H1	201484_at	-0.66159	0.47893	0.816747	298
WWTR1	202133_at	0.49718	-0.64677	0.815781	299
SPECC1L	212480_at	0.64758	-0.49597	0.815687	300
APLP2	208704_x_at	-0.65323	0.4871	0.814847	301
ABAT	209460_at	-0.56573	0.58589	0.814443	302
FZD5	206136_at	0.67097	-0.46109	0.814128	303
C1orf216	212791_at	-0.60202	0.54798	0.81407	304
NFATC1	210162_s_at	0.61774	-0.52984	0.813839	305
DLG1	217208_s_at	0.68226	-0.44194	0.81289	306
HTN3	206786_at	0.64556	-0.49234	0.811878	307
TCF7L2	212761_at	0.60927	-0.53548	0.81114	308
PHF17	218517_at	0.57702	-0.56976	0.810912	309
CAMKK2	212252_at	-0.54556	0.5996	0.810652	310
DYNLT1	201999_s_at	0.40161	-0.70403	0.810524	311
SCN3A	210432_s_at	-0.66774	0.45847	0.809982	312
MAP2K3	215498_s_at	0.5754	-0.56895	0.80919	313
NEUROD1	206282_at	-0.67782	0.44032	0.808283	314
C19orf50	200076_s_at	0.54032	-0.60081	0.808034	315
IL15	205992_s_at	0.70756	-0.39022	0.80803	316
C1orf116	219476_at	0.65635	-0.47127	0.808017	317
CASP4	213596_at	0.57742	-0.56492	0.807805	318
MKKS	218138_at	-0.64758	0.48266	0.807664	319
C1S	208747_s_at	0.31976	-0.74113	0.807168	320
MSX1	205932_s_at	0.5126	-0.62329	0.807	321
AV700298	217523_at	0.34556	-0.72863	0.80642	322
F9	207218_at	0.625	-0.50847	0.805709	323
NOTCH1	218902_at	0.65726	-0.46532	0.805303	324
AW301861	213705_at	0.66048	-0.46008	0.804927	325
MEOX2	206202_at	0.52399	-0.61028	0.804368	326
FDFT1	208647_at	0.41169	-0.68992	0.803417	327
RGS4	204337_at	-0.5875	0.54758	0.803119	328
LILRA6	208594_x_at	0.62218	-0.50766	0.803011	329
NUP214	202155_s_at	0.53145	-0.60121	0.802429	330
LRRC8E	220174_at	0.61371	-0.51532	0.80137	331
CSF2	210229_s_at	0.62621	-0.4996	0.801086	332
ADAM18	207597_at	0.61381	-0.51442	0.800869	333
NUP160	212709_at	0.47984	-0.64073	0.800488	334
NOTCH2NL	214722_at	0.58992	-0.53992	0.799699	335
CABP1	208321_s_at	-0.56492	0.56573	0.79949	336
SNCG	209877_at	-0.66008	0.4496	0.798652	337
AF319573	211788_s_at	0.61552	-0.50726	0.797607	338
CYP3A4	210726_at	0.58458	-0.54224	0.797344	339
CNNM1	220166_at	-0.58952	0.53669	0.797226	340
MATN2	202350_s_at	0.41976	-0.67742	0.796929	341
AF119846	210501_x_at	-0.59395	0.53065	0.796471	342
PTPN4	205171_at	-0.50847	0.6129	0.796359	343
FRAT1	219889_at	0.59688	-0.52631	0.795781	344
MBTD1	207115_x_at	0.61411	-0.50524	0.795235	345
PARP12	218543_s_at	0.56371	-0.56089	0.795215	346
KLF9	203542_s_at	0.54556	-0.57782	0.794677	347
FBXW7	218751_s_at	-0.45484	0.65161	0.794654	348
TAC1	206552_s_at	-0.62581	0.48952	0.794524	349
ZNF500	213639_s_at	0.58952	-0.53266	0.794519	350
TNFSF14	207907_at	0.62964	-0.48387	0.794089	351
HMGN4	202579_x_at	-0.6497	0.45333	0.792224	352
AA485908	213792_s_at	0.60927	-0.50605	0.792021	353
CTAG1A	211674_x_at	0.59536	-0.52177	0.791642	354
PLA2R1	210194_at	0.65746	-0.44012	0.791176	355
NM_014656	203144_s_at	0.58508	-0.53226	0.790961	356
LTF	202018_s_at	0.39516	-0.68508	0.790877	357
DPH5	219590_x_at	0.6629	-0.43105	0.790722	358
CEP350	204373_s_at	0.51573	-0.59879	0.79027	359
C6orf162	213312_at	-0.59113	0.52419	0.79007	360
AF307080	209867_s_at	-0.57379	0.54274	0.789811	361
AJ225093	211835_at	0.55847	-0.55847	0.789796	362
KLK3	204582_s_at	0.57268	-0.54284	0.789074	363
IDS	202439_s_at	-0.65444	0.44032	0.78878	364
ACTR8	218658_s_at	0.60605	-0.50484	0.788771	365
SAMHD1	205296_at	0.55121	-0.56371	0.788417	366
GMPR	204187_at	0.36573	-0.69556	0.785851	367
CADPS2	219572_at	-0.47419	0.62661	0.785809	368
PIK3C3	204297_at	0.57863	-0.53145	0.785654	369
X81636	216293_at	0.58034	-0.52954	0.785625	370
CADM3	211677_x_at	-0.60121	0.50444	0.784801	371
RANBP9	202583_s_at	-0.59758	0.50847	0.78463	372
IRAK4	219618_at	0.61653	-0.48468	0.784235	373
CSF2RA	211286_x_at	0.46855	-0.62782	0.783388	374
GAN	220124_at	0.49234	-0.60887	0.783021	375
CASK	211208_s_at	0.52782	-0.57581	0.781122	376
SP110	208392_x_at	0.58478	-0.51764	0.780973	377
LRRFIP1	201862_s_at	0.45	-0.6375	0.780324	378
DYNC2LI1	203763_at	-0.45282	0.63548	0.780308	379
RHBDD3	217622_at	0.62903	-0.46169	0.78028	380
PPP2R3A	207749_s_at	0.57823	-0.52379	0.780196	381
PLA2G2F	215870_s_at	0.55726	-0.54597	0.780142	382
PBOV1	208329_at	0.64325	-0.44083	0.779809	383
SYNCRIP	209025_s_at	-0.51492	0.58548	0.779698	384
ATP2A3	213036_x_at	0.61371	-0.48044	0.779399	385
CLDN10	205328_at	-0.6496	0.42903	0.77849	386
CLN8	219340_s_at	0.64153	-0.44073	0.778334	387
ZNF34	219801_at	0.59597	-0.5004	0.77819	388
SYNC1	221276_s_at	0.44929	-0.63498	0.777857	389
H2AFB2	214412_at	0.56532	-0.53427	0.777837	390
ALDH3A2	202054_s_at	0.25887	-0.73306	0.777426	391
CHRNB3	217086_at	0.53972	-0.55927	0.777226	392
C1orf89	220963_s_at	0.66008	-0.41008	0.777092	393
TXNDC9	203008_x_at	-0.56976	0.52782	0.776673	394
REG1B	205886_at	0.6255	-0.45897	0.775825	395
CSNK1A1	208865_at	0.31331	-0.70927	0.775388	396
NEUROD6	220045_at	-0.6129	0.4746	0.775172	397
NOTCH4	205247_at	0.62581	-0.45726	0.775064	398
RRAGC	218088_s_at	0.48306	-0.60605	0.775012	399
KIAA0368	212427_at	-0.64355	0.43105	0.774571	400
AL109671	214896_at	-0.58629	0.50444	0.773431	401
TRH	206622_at	0.61361	-0.47006	0.772964	402
ARF6	214182_at	0.49556	-0.59274	0.772606	403
NRIP2	215104_at	0.61895	-0.46008	0.771215	404
MXRA8	213422_s_at	0.58921	-0.49748	0.771139	405
RNMT	202683_s_at	-0.53508	0.55524	0.771104	406
FMO5	205776_at	0.53669	-0.55323	0.770779	407
ZFP36L2	201368_at	0.38347	-0.66815	0.770372	408
EIF5	208707_at	0.61935	-0.45645	0.769377	409
PBXIP1	214177_s_at	0.5504	-0.53669	0.76875	410
USP15	209475_at	-0.63105	0.43831	0.768336	411
BE466525	221884_at	0.58105	-0.50202	0.767882	412
U62966	207560_at	0.55081	-0.53427	0.767357	413
ECM2	206101_at	0.46694	-0.60887	0.767304	414
FAM50A	203262_s_at	0.49919	-0.58145	0.766339	415
KCNAB1	210078_s_at	-0.60675	0.46804	0.766294	416
SGTA	201396_s_at	0.625	-0.44274	0.765927	417
CTPS2	219080_s_at	0.61129	-0.45887	0.764354	418
HLA-E	200904_at	0.54556	-0.53427	0.763597	419
MASP1	213749_at	0.49032	-0.58387	0.762442	420
AL049435	213817_at	0.37298	-0.66492	0.762386	421
ZNF395	218149_s_at	0.56613	-0.51028	0.762161	422
CYP3A4	205999_x_at	0.64153	-0.41048	0.761613	423
BZRAP1	205839_s_at	-0.45766	0.60847	0.761373	424
SAV1	218276_s_at	0.56452	-0.50968	0.760563	425
CGGBP1	206861_s_at	0.60766	-0.45645	0.759998	426
TPMT	203671_at	0.60927	-0.45363	0.759599	427
CLEC7A	221698_s_at	0.60504	-0.45867	0.759244	428
BMP4	211518_s_at	0.58478	-0.48397	0.759075	429
BE503392	213637_at	0.59315	-0.47339	0.758897	430
NM_015371	207215_at	0.5878	-0.47994	0.758849	431
CDH11	207172_s_at	-0.62823	0.42419	0.75803	432
RB1CC1	202033_s_at	-0.62298	0.43185	0.758023	433
UFM1	218050_at	-0.5996	0.4629	0.757494	434
BICD2	212702_s_at	-0.62702	0.4246	0.757258	435
ZNF136	206240_s_at	0.5871	-0.47661	0.756203	436
H05812	203628_at	0.64718	-0.39032	0.755772	437
CUX1	214743_at	0.62661	-0.42137	0.755111	438
FAM53B	203206_at	0.50685	-0.55968	0.755075	439
GATA2	210358_x_at	0.44929	-0.60635	0.754667	440
DHFR	202532_s_at	0.57339	-0.49032	0.754447	441
GTSE1	204318_s_at	0.55161	-0.51452	0.754324	442
ATP5E	217801_at	-0.61331	0.43871	0.754066	443
IQCK	213392_at	0.53669	-0.52903	0.753597	444
SIRT3	221562_s_at	-0.65605	0.37016	0.753273	445
R3HDM1	202754_at	-0.52621	0.53831	0.752778	446
FSTL1	208310_s_at	-0.57863	0.48145	0.752733	447
PCSK1	205825_at	-0.50645	0.55605	0.752119	448
CYP3A7	211843_x_at	0.6378	-0.39849	0.752053	449
PAX3	216059_at	0.51482	-0.54808	0.751952	450
KCND1	206842_at	0.64435	-0.3869	0.751584	451
OSBPL10	219073_s_at	-0.49597	0.56452	0.751445	452
ARNT2	202986_at	-0.60444	0.44637	0.751395	453
PTBP1	211270_x_at	0.53226	-0.53024	0.751302	454
U92992	217380_s_at	0.59234	-0.46169	0.751016	455
XYLB	208318_s_at	0.62228	-0.41825	0.749777	456
BTG3	215425_at	0.56371	-0.49315	0.748977	457
CCDC130	208094_s_at	0.62823	-0.40766	0.748906	458
AL035603	217107_at	0.52379	-0.53306	0.747335	459
PRL	205445_at	0.52187	-0.53478	0.74722	460
C1orf41	215691_x_at	-0.54718	0.50847	0.746959	461
KCTD15	218553_s_at	0.60716	-0.43437	0.746539	462
FADS1	208962_s_at	0.56371	-0.48911	0.746323	463
IL24	206569_at	0.55454	-0.49808	0.745385	464
RAB7A	217268_at	0.59204	-0.4499	0.743587	465
TSPAN8	203824_at	0.55806	-0.49073	0.743133	466
PHKA2	209439_s_at	0.46855	-0.57621	0.742669	467
SST	213921_at	-0.51694	0.53266	0.742263	468
AF070547	215972_at	-0.46331	0.57984	0.742207	469
C1orf115	218546_at	-0.4379	0.59879	0.741826	470
CFLAR	211862_x_at	0.53306	-0.51532	0.741423	471
AU155105	214782_at	0.57581	-0.46653	0.741085	472
TMEM151B	213676_at	-0.58105	0.45968	0.740895	473
MMP11	203877_at	0.60847	-0.42258	0.740817	474
DPF3	219746_at	0.54002	-0.50635	0.740278	475
EIF3K	221494_x_at	-0.55403	0.48992	0.739575	476
PZP	207330_at	0.61048	-0.41734	0.739499	477
LRP1B	219643_at	-0.49476	0.5496	0.739491	478
MKL2	218259_at	-0.55242	0.49153	0.739439	479
ANKRD34C	216073_at	-0.52379	0.52137	0.739042	480
CHRDL1	209763_at	-0.62056	0.4004	0.738522	481
ST3GAL4	203759_at	0.59345	-0.43921	0.738301	482
NM_016610	220832_at	0.51371	-0.53024	0.738277	483
AF053356	217450_at	0.55403	-0.48589	0.736911	484
PTEN	222176_at	0.51371	-0.52823	0.736834	485
PTN	209466_x_at	-0.5121	0.52944	0.736582	486
ZBTB16	205883_at	0.52742	-0.51411	0.736533	487
NEK9	212299_at	0.39113	-0.62379	0.736272	488
CLIP3	212358_at	-0.53548	0.50403	0.735381	489
EFR3A	212149_at	-0.55323	0.48427	0.735242	490
BIRC2	202076_at	0.47056	-0.56452	0.734921	491
CAMP	210244_at	0.57359	-0.45645	0.733043	492
PISD	215699_x_at	0.59597	-0.4254	0.73222	493
NUP98	210793_s_at	0.47016	-0.56129	0.732186	494
DRD4	208215_x_at	0.59435	-0.42641	0.73149	495
AGTR1	208016_s_at	0.54325	-0.48982	0.731467	496
KCNQ2	205737_at	-0.56895	0.45927	0.731186	497
NFX1	210268_at	0.59798	-0.42016	0.730831	498
CAPZA1P	217392_at	0.60927	-0.40323	0.730619	499
SNAPC2	204104_at	0.56573	-0.46169	0.730211	500
AF043586	216394_x_at	0.57026	-0.45554	0.729872	501
KRTAP5-8	208532_x_at	0.53589	-0.49516	0.729631	502
SAFB2	32099_at	0.51815	-0.51331	0.72936	503
ZNF268	209989_at	0.59435	-0.42218	0.729032	504
COL8A2	52651_at	0.4379	-0.58226	0.728549	505
ADK	204119_s_at	-0.40806	0.60323	0.728285	506
NM_014163	220695_at	0.52298	-0.50605	0.727733	507
USH1C	205137_x_at	0.38508	-0.61734	0.727596	508
UNC119B	202365_at	0.30524	-0.65968	0.726876	509
DEC1	220781_at	0.62702	-0.36694	0.726498	510
ADAMTS6	220866_at	0.63347	-0.35524	0.726278	511
SLCO1C1	220460_at	-0.59194	0.41976	0.725666	512
TBC1D30	213913_s_at	-0.42702	0.58669	0.725639	513
ERF	203643_at	0.55968	-0.46169	0.725534	514
DCLRE1A	209804_at	-0.58306	0.42903	0.723896	515
BCL11B	219528_s_at	-0.64274	0.33226	0.723541	516
B4GALT6	206232_s_at	-0.49788	0.52429	0.723025	517
AFM	206840_at	0.43024	-0.58105	0.722998	518
PRPF19	203103_s_at	-0.56613	0.4496	0.722941	519
MED13L	212207_at	0.53468	-0.48629	0.722745	520
CFHR2	206910_x_at	0.53548	-0.48508	0.722524	521
STAG1	202293_at	0.57742	-0.43427	0.722499	522
AL523275	213710_s_at	-0.52339	0.49798	0.722441	523
ERLIN2	221543_s_at	0.37177	-0.61935	0.722362	524
TSPAN9	220968_s_at	0.62218	-0.36653	0.722116	525
EFS	204400_at	0.55605	-0.45968	0.721455	526
SLC9A3R2	215735_s_at	-0.61411	0.37702	0.720608	527
SPAG1	210117_at	0.5375	-0.47984	0.720523	528
ARMCX2	203404_at	-0.57702	0.43105	0.720247	529
U82303	216702_x_at	0.50685	-0.51048	0.719366	530
PDE2A	204134_at	-0.46331	0.55	0.719136	531
PPARD	37152_at	0.57944	-0.4254	0.71883	532
WT1	206067_s_at	0.58649	-0.41452	0.71819	533
NRXN1	216096_s_at	-0.55766	0.45242	0.718101	534
CDH10	220115_s_at	-0.42742	0.57702	0.718081	535
PTPN11	212610_at	0.54556	-0.46613	0.717574	536
PTPRR	210675_s_at	-0.29113	0.65565	0.71738	537
BF510692	221969_at	0.5379	-0.4746	0.717343	538
DMD	203881_s_at	-0.4879	0.52581	0.717302	539
PPT1	200975_at	-0.58145	0.41935	0.716895	540
EXPH5	214734_at	0.49798	-0.51532	0.716616	541
X97875	217158_at	0.57308	-0.42893	0.715822	542
PAX8	209552_at	0.40645	-0.58871	0.715389	543
AJAP1	215790_at	0.48397	-0.5253	0.71426	544
R41498	212976_at	-0.58387	0.41089	0.713957	545
ESR1	205225_at	0.5496	-0.45565	0.713917	546
C16orf33	218493_at	-0.44153	0.56089	0.713825	547
NME2	201268_at	-0.6004	0.38548	0.713495	548
EPHA2	203499_at	0.52581	-0.48226	0.713478	549
LGALS9	203236_s_at	0.48992	-0.51855	0.713383	550
DSP	200606_at	0.39073	-0.59597	0.712636	551
RHOQ	212122_at	0.44879	-0.55323	0.712373	552
PIAS4	212879_x_at	0.56089	-0.43911	0.712331	553
BAI2	204966_at	-0.57379	0.42177	0.712127	554
M11722	210487_at	0.587	-0.40212	0.711526	555
SAA3P	222226_at	0.5626	-0.43538	0.711389	556
MVK	36907_at	0.55444	-0.44516	0.711035	557
NT5E	203939_at	-0.60635	0.37127	0.710986	558
DLGAP2	216916_s_at	0.58821	-0.39909	0.710819	559
HOMER3	204647_at	0.51371	-0.49073	0.710432	560
CPT1B	210069_at	0.49546	-0.50756	0.709294	561
MXD4	210778_s_at	0.53871	-0.46089	0.708963	562
SLC12A9	220371_s_at	0.52823	-0.47258	0.708773	563
RGS5	209070_s_at	-0.50595	0.49627	0.70871	564
IGSF6	206420_at	0.55958	-0.43437	0.708383	565
NM_031269	208139_s_at	0.58861	-0.39183	0.707101	566
DLX2	207147_at	-0.40605	0.57823	0.70656	567
ING3	205070_at	0.49637	-0.50242	0.706264	568
AK026856	216793_x_at	0.55373	-0.43821	0.706148	569
TCF7L1	221016_s_at	0.53669	-0.45887	0.706115	570
PCP4	205549_at	-0.5754	0.40927	0.706107	571
NM_017959	208145_at	0.56734	-0.42036	0.7061	572
RNASEH2A	203022_at	0.5871	-0.39153	0.705679	573
GATA3	209603_at	0.57188	-0.41341	0.705659	574
EHD1	209039_x_at	0.48024	-0.51694	0.70559	575
SERPINA5	209443_at	0.38024	-0.59435	0.705574	576
ARSD	206831_s_at	0.5256	-0.46875	0.70426	577
CHD3	208806_at	-0.55766	0.42863	0.703355	578
COG2	203073_at	0.56976	-0.41169	0.702933	579
EDF1	209059_s_at	-0.55766	0.42742	0.702618	580
PHLDB1	216019_x_at	0.52964	-0.46129	0.702358	581
RFX2	208031_s_at	0.5004	-0.49274	0.702277	582
KCNAB2	203402_at	-0.56815	0.4125	0.702104	583
MT1F	213629_x_at	0.48669	-0.50565	0.701818	584
SLC35F2	218826_at	0.525	-0.46492	0.701267	585
GCNT3	219508_at	0.50484	-0.48669	0.701235	586
SMOX	210357_s_at	0.5875	-0.38145	0.700472	587
NM_014403	220937_s_at	0.53911	-0.44677	0.700174	588
RARRES2	209496_at	0.4997	-0.49002	0.699871	589
VPRBP	204376_at	0.51573	-0.47298	0.699777	590
LOC100130958	215301_at	0.50212	-0.487	0.699495	591
BF110411	221878_at	0.4129	-0.56411	0.699075	592
IMP4	212411_at	-0.52218	0.46411	0.69862	593
AL049987	213605_s_at	0.4375	-0.54435	0.698372	594
F8A1	203274_at	-0.51452	0.47218	0.698344	595
AL080106	216121_at	0.52056	-0.46532	0.698216	596
LOC286434	222196_at	0.55726	-0.42056	0.698147	597
HS3ST2	219697_at	-0.44556	0.53589	0.696923	598
ZMAT3	219628_at	-0.58347	0.37984	0.696215	599
SLC25A6	212826_s_at	-0.49758	0.48669	0.696027	600
QKI	212262_at	0.50645	-0.47742	0.696004	601
SLC22A6	216599_x_at	0.48942	-0.49466	0.69586	602
SS18L1	213140_s_at	-0.59325	0.363	0.695496	603
PRC1	218009_s_at	-0.56734	0.40161	0.695101	604
ACSBG2	221716_s_at	0.60605	-0.34032	0.695064	605
ZBTB10	219312_s_at	0.51532	-0.46613	0.694861	606
FLJ20323	209672_s_at	0.55524	-0.41573	0.69363	607
NM_024934	220849_at	0.55968	-0.40968	0.693599	608
tcag7.1314	213142_x_at	-0.55282	0.41855	0.693393	609
SLC30A9	202614_at	-0.47419	0.50524	0.69291	610
JMJD2B	216023_at	0.49556	-0.48407	0.692751	611
AL162013	214781_at	-0.52863	0.44758	0.69266	612
DBNDD1	222234_s_at	-0.51048	0.46573	0.69101	613
STOML1	204701_s_at	-0.43831	0.53347	0.690439	614
ProSAPiP1	204447_at	-0.51331	0.46169	0.690395	615
PPIL2	209299_x_at	0.52913	-0.44304	0.690118	616
FAM65A	218029_at	-0.54194	0.42702	0.68996	617
MAB21L2	210302_s_at	0.44929	-0.52349	0.689857	618
MARS	201475_x_at	-0.57056	0.3875	0.689706	619
ICAM1	202637_s_at	0.58024	-0.37258	0.689561	620
SLC35A3	209865_at	0.54516	-0.42177	0.689267	621
PPIE	202494_at	0.57056	-0.38468	0.688126	622
WIPI2	214699_x_at	0.51129	-0.46048	0.688084	623
KIAA1107	214098_at	-0.51976	0.4496	0.687234	624
TNXB	216333_x_at	0.5629	-0.39395	0.687061	625
AA554430	214964_at	0.52379	-0.44435	0.686879	626
UGT1A6	206094_x_at	0.48306	-0.4879	0.686581	627
AL050053	216093_at	0.52823	-0.43831	0.686398	628
DALRD3	218808_at	0.64103	-0.24466	0.686133	629
CD79B	205297_s_at	0.45726	-0.51008	0.685032	630
SLCO1B3	206354_at	0.59506	-0.33901	0.684853	631
MDH2	213333_at	-0.50565	0.46129	0.684449	632
TOR1A	202349_at	-0.50887	0.45766	0.684399	633
RGS16	209324_s_at	0.50565	-0.46048	0.683903	634
NEBL	203961_at	0.27016	-0.62823	0.683856	635
TNFRSF9	207536_s_at	0.57379	-0.37177	0.683702	636
TRIM24	204391_x_at	0.52056	-0.44234	0.683116	637
KLHL24	221985_at	0.50806	-0.45645	0.682987	638
MAP3K9	213927_at	-0.5371	0.42137	0.682663	639
MRCL3	201318_s_at	-0.41371	0.54113	0.681159	640
GPRC5C	219327_s_at	0.51361	-0.44708	0.680937	641
R71245	217654_at	0.58266	-0.35081	0.680118	642
ITGB4	214292_at	0.50171	-0.45837	0.67957	643
USH1C	211184_s_at	0.45363	-0.50565	0.67931	644
AL110206	216465_at	0.49829	-0.46159	0.679234	645
GLUD2	215794_x_at	-0.48508	0.475	0.678916	646
CCL20	205476_at	0.53659	-0.41442	0.677992	647
TIMM44	203093_s_at	0.40806	-0.53992	0.676777	648
CCIN	210642_at	0.5754	-0.35363	0.675381	649
YIPF3	216338_s_at	-0.48387	0.47056	0.67495	650
IFI27	202411_at	-0.50202	0.4504	0.674451	651
MAST3	213045_at	-0.46129	0.49194	0.674384	652
INHBA	210511_s_at	0.38135	-0.55595	0.674172	653
ABLIM3	205730_s_at	0.48226	-0.47097	0.674083	654
TTC22	215107_s_at	0.54748	-0.39183	0.67325	655
ZNF350	219266_at	0.64153	-0.20323	0.672951	656
SPACA1	220982_s_at	0.54889	-0.38901	0.672762	657
C17orf80	221048_x_at	0.45998	-0.48921	0.671497	658
RAPGEFL1	218657_at	-0.57903	0.33992	0.671432	659
KLF2	219371_s_at	0.55242	-0.38105	0.671094	660
ATP2B2	216120_s_at	-0.49647	0.45151	0.671077	661
AW085556	214607_at	-0.46532	0.48347	0.671019	662
CENPE	205046_at	0.45877	-0.48921	0.670669	663
CDC42EP4	218063_s_at	0.49244	-0.45514	0.670559	664
PTPRT	205948_at	-0.43347	0.51129	0.670309	665
MT1L	204326_x_at	0.37419	-0.55605	0.670231	666
BCAP29	205084_at	-0.39758	0.53911	0.669858	667
ACO2	200793_s_at	-0.49516	0.45081	0.669637	668
NCAPD2	201774_s_at	0.46452	-0.48065	0.668433	669
GIT2	204982_at	0.47762	-0.46734	0.668227	670
CSPG5	39966_at	-0.50121	0.44194	0.668223	671
NKX3-1	209706_at	0.5131	-0.42702	0.667546	672
NPY	206001_at	-0.38508	0.54516	0.667447	673
VIPR2	205947_s_at	0.38871	-0.54173	0.666758	674
TOX3	214774_x_at	-0.53024	0.40282	0.665897	675
SFTPC	38691_s_at	0.48548	-0.45484	0.66526	676
PIK3R1	212249_at	0.60927	-0.26492	0.664374	677
RSU1	201980_s_at	-0.48589	0.45202	0.663635	678
SFN	33322_i_at	0.46734	-0.46895	0.662058	679
BRD1	204520_x_at	0.34637	-0.5621	0.660249	680
CA11	209726_at	-0.50766	0.42137	0.659751	681
Z84723	217212_s_at	0.5375	-0.38226	0.659567	682
CNR1	208243_s_at	0.51905	-0.40655	0.659315	683
SCGB1D2	206799_at	0.39567	-0.52732	0.659258	684
VANGL1	219330_at	0.54758	-0.36694	0.659158	685
LOC643332	216667_at	0.39516	-0.52742	0.659032	686
MED25	208110_x_at	0.51694	-0.40706	0.65797	687
ACTL7B	220498_at	0.58024	-0.30988	0.657802	688
CNDP2	217752_s_at	0.55282	-0.35645	0.657774	689
RAB3B	205924_at	-0.45806	0.46976	0.65612	690
CSH2	208342_x_at	0.52591	-0.39183	0.655829	691
PPP1CC	200726_at	0.41976	-0.50363	0.655623	692
CSNK2A2	203575_at	0.49315	-0.43185	0.655508	693
DUSP6	208891_at	-0.525	0.39234	0.655405	694
FN1	211719_x_at	-0.49153	0.43347	0.655361	695
FKBP8	222007_s_at	0.54032	-0.36956	0.654615	696
HDGFRP3	209524_at	-0.36895	0.54073	0.654609	697
NM_014724	206507_at	0.46603	-0.45796	0.653385	698
AI478300	217526_at	0.56361	-0.33014	0.653183	699
SDC1	201287_s_at	0.40685	-0.51089	0.653097	700
YLPM1	214713_at	-0.55806	0.33831	0.652598	701
GADD45GIP1	212891_s_at	-0.50605	0.41129	0.652109	702
SFTPB	37004_at	0.50927	-0.40726	0.652086	703
NM_015376	205801_s_at	0.49677	-0.42218	0.651933	704
CYP3A4	205998_x_at	0.5371	-0.36815	0.651161	705
EMR2	207610_s_at	0.52984	-0.37742	0.65052	706
SRF	202401_s_at	-0.48387	0.43468	0.650444	707
CTBP1	203392_s_at	-0.52218	0.3875	0.650252	708
SNN	218033_s_at	-0.46774	0.45161	0.650179	709
TRBV6-4	216578_at	0.53377	-0.37046	0.649732	710
TSPAN6	209108_at	0.30806	-0.57177	0.649478	711
ATP10B	220920_at	0.48347	-0.43306	0.649064	712
FCN1	205237_at	0.50403	-0.40887	0.649015	713
BG482805	214777_at	0.47813	-0.43861	0.648835	714
NOTCH2	202445_s_at	0.46411	-0.45323	0.648703	715
AP2B1	200615_s_at	-0.60766	0.225	0.647978	716
SGK2	220357_s_at	0.5496	-0.34274	0.647712	717
MAPKAPK2	201461_s_at	0.50524	-0.40524	0.647678	718
PIK3R4	216752_at	0.48014	-0.43317	0.646661	719
FADS1	217462_at	0.53589	-0.36089	0.64608	720
FN1	216442_x_at	-0.49274	0.41774	0.645987	721
SYK	207540_s_at	0.41532	-0.49435	0.645657	722
AA502643	213655_at	-0.43347	0.4746	0.642761	723
UMOD	206716_at	0.4496	-0.45927	0.642705	724
ASPH	210896_s_at	-0.57329	0.29002	0.642474	725
SCYL2	221220_s_at	0.55585	-0.32016	0.641461	726
EIF3B	203462_x_at	0.46331	-0.44274	0.640839	727
OR7E12P	216698_x_at	0.51129	-0.38589	0.640569	728
TRIM31	215444_s_at	0.47903	-0.4252	0.640519	729
TBCE	203715_at	-0.55575	0.31825	0.640423	730
H2AFX	205436_s_at	0.49153	-0.40968	0.639875	731
TEAD3	209454_s_at	0.5246	-0.36512	0.639154	732
TBX4	220634_at	0.50907	-0.38629	0.63904	733
NTRK3	217033_x_at	0.47984	-0.42137	0.638591	734
ACYP2	206833_s_at	-0.35766	0.52903	0.638587	735
NPAS2	205459_s_at	-0.42702	0.47419	0.638124	736
PHF20L1	219606_at	0.39617	-0.5002	0.638084	737
PEG3	209242_at	-0.49556	0.40161	0.637864	738
C7orf43	220659_s_at	-0.43992	0.46169	0.63772	739
GPC4	204984_at	0.48387	-0.41331	0.636361	740
KIAA1659	215674_at	0.5371	-0.34113	0.636275	741
SI	206664_at	0.51855	-0.36855	0.636179	742
PPIAL	217346_at	-0.49808	0.39425	0.63523	743
NM_021812	220772_at	0.54113	-0.33165	0.634676	744
BBS4	212745_s_at	-0.52298	0.35726	0.633358	745
EXDL2	218363_at	-0.60242	0.19395	0.632872	746
TTC9	213172_at	-0.40081	0.48952	0.632676	747
GJB5	206156_at	0.50927	-0.3746	0.632203	748
B4GALNT1	206435_at	-0.44345	0.44909	0.631134	749
MLLT4	208512_s_at	0.53942	-0.32732	0.630961	750
POMC	205720_at	0.54587	-0.31643	0.630953	751
PLEKHO2	204436_at	0.4871	-0.39919	0.629777	752
CLIC5	213317_at	-0.3754	0.50565	0.629767	753
LUC7L2	217842_at	0.5254	-0.34677	0.629519	754
CHRNA1	211039_at	0.38256	-0.4995	0.629168	755
SLC22A14	207408_at	0.47419	-0.41331	0.629032	756
TRA@	210972_x_at	0.51008	-0.36694	0.628352	757
ALDOC	202022_at	-0.48952	0.39395	0.628352	758
UBP1	218082_s_at	-0.45605	0.43145	0.627798	759
BATF	205965_at	0.38992	-0.49194	0.627728	760
FBN2	203184_at	0.54083	-0.31804	0.627413	761
FAF1	218080_x_at	0.54234	-0.31452	0.626941	762
BTF3L3	217467_at	0.52621	-0.34073	0.626892	763
RPL28	213223_at	0.42621	-0.45968	0.626866	764
PCDHGA10	211875_x_at	0.4125	-0.47117	0.626225	765
ELF3	201510_at	0.41603	-0.46724	0.625615	766
BPI	205557_at	0.43337	-0.45111	0.625548	767
AW103265	203101_s_at	0.56724	-0.26361	0.625501	768
AI983904	221973_at	-0.44194	0.44153	0.624708	769
FLJ22222	219254_at	0.48962	-0.38518	0.62297	770
MAOA	212741_at	-0.49758	0.37379	0.622338	771
KYNU	210662_at	0.36452	-0.50383	0.621868	772
IGF2	202410_x_at	0.53992	-0.30847	0.621826	773
N4BP1	32069_at	0.4754	-0.40081	0.621815	774
ARHGEF10L	221656_s_at	0.55323	-0.28387	0.621808	775
RANBP9	202582_s_at	-0.4754	0.4004	0.621551	776
GRAP	206620_at	0.53821	-0.31079	0.621499	777
HMG20B	210719_s_at	0.4372	-0.43881	0.619434	778
AL042733	41512_at	0.39597	-0.47621	0.619329	779
PRDM12	220894_x_at	0.5244	-0.32742	0.618223	780
EFHC2	220523_at	0.42429	-0.44869	0.617531	781
PRKAR2A	204843_s_at	0.55121	-0.27823	0.61745	782
CTAGE5	204055_s_at	-0.50645	0.35282	0.617231	783
THY1	213869_x_at	-0.46935	0.40081	0.617202	784
SLC47A1	219525_at	0.38992	-0.47823	0.617043	785
SMG6	220347_at	0.44879	-0.42056	0.615047	786
LILRA4	210313_at	0.32379	-0.52258	0.61476	787
ACACA	212186_at	-0.46381	0.40312	0.614512	788
HMGCR	202540_s_at	-0.47339	0.39153	0.614324	789
RNF121	219021_at	0.50363	-0.35121	0.613996	790
ITGB1	216190_x_at	-0.42782	0.43891	0.612921	791
MCM3AP	214514_at	0.4869	-0.37218	0.612854	792
ADAMDEC1	206134_at	0.41532	-0.4504	0.612659	793
ZNF20	213916_at	0.53347	-0.30121	0.612632	794
IL20RA	219115_s_at	0.50685	-0.34395	0.612535	795
GJC2	214302_x_at	0.56593	-0.23387	0.61235	796
INSL5	221091_at	0.55726	-0.25323	0.612098	797
USP46	203870_at	-0.50242	0.3496	0.612083	798
FETUB	214417_s_at	0.54355	-0.27823	0.610621	799
LITAF	200704_at	0.40806	-0.45403	0.610456	800
PDE3A	206388_at	0.4629	-0.39718	0.609941	801
AU148039	216289_at	0.42661	-0.43589	0.609915	802
ELOVL2	213712_at	-0.52661	0.30766	0.609896	803
DHRS9	219799_s_at	0.37823	-0.47823	0.609723	804
RBX1	218117_at	-0.51159	0.33155	0.609631	805
GRM6	208035_at	0.44435	-0.41694	0.609332	806
GSTM4	210912_x_at	0.4125	-0.44839	0.60927	807
PSCD1	202880_s_at	0.50403	-0.34194	0.609072	808
CRYZ	202950_at	-0.45282	0.40726	0.609021	809
BHLHB2	201170_s_at	-0.3879	0.46935	0.608897	810
SPTB	208416_s_at	0.43669	-0.42419	0.608798	811
AJ251844	216362_at	0.43629	-0.4246	0.608797	812
ATF5	204998_s_at	0.44677	-0.41331	0.608628	813
KIR3DX1	216428_x_at	0.41331	-0.44677	0.608628	814
LL22NC03-75B3.6	221901_at	-0.49234	0.35645	0.607828	815
TEAD1	214600_at	0.56089	-0.23185	0.60692	816
MAP1A	203151_at	-0.48347	0.36532	0.605972	817
NUBP1	203978_at	0.53266	-0.2879	0.605486	818
COMT	213981_at	0.45524	-0.39919	0.605472	819
PTCRA	211252_x_at	0.56371	-0.21895	0.604738	820
NM_018276	219919_s_at	0.4124	-0.44163	0.604244	821
KIAA0415	209913_x_at	0.53952	-0.27097	0.603744	822
KRTAP5-9	214517_at	0.53538	-0.27308	0.601003	823
MST1R	205455_at	0.44798	-0.3996	0.600305	824
MYO5C	218966_at	0.49153	-0.34435	0.600149	825
HOMER3	215489_x_at	0.50242	-0.32823	0.600134	826
C21orf62	220543_at	0.48669	-0.3496	0.599239	827
AF078844	210524_x_at	0.34476	-0.48992	0.599067	828
ITPR2	211360_s_at	0.49274	-0.33952	0.598387	829
LCE2B	207710_at	0.42621	-0.41895	0.59764	830
MT1H	206461_x_at	0.30524	-0.51371	0.597553	831
CCDC121	220321_s_at	0.47419	-0.3629	0.59712	832
TTC22	220309_at	0.38871	-0.45323	0.597087	833
RIBC2	206526_at	0.50363	-0.31935	0.596345	834
CSF1	209716_at	0.45444	-0.38589	0.596177	835
OSBPL7	210344_at	0.52288	-0.28619	0.596077	836
SPDEF	214403_x_at	0.47581	-0.35887	0.595972	837
PRSS21	220051_at	0.46371	-0.37419	0.595857	838
SEC63	201914_s_at	0.47339	-0.36129	0.595507	839
CYLC1	216778_s_at	0.42107	-0.42067	0.5952	840
VCAM1	203868_s_at	0.35655	-0.47651	0.595138	841
SKIP	202782_s_at	0.49879	-0.32339	0.594451	842
SNPH	215917_at	0.43065	-0.40968	0.594388	843
GNAS	200981_x_at	-0.47661	0.35484	0.594196	844
SPTLC2	203127_s_at	0.25685	-0.53548	0.593895	845
AW873544	215769_at	0.48831	-0.3379	0.593821	846
GDAP1L1	219668_at	-0.32218	0.49839	0.593458	847
GLUD1	200946_x_at	-0.49395	0.32702	0.592392	848
ACAD8	221669_s_at	-0.50161	0.31371	0.59163	849
POMZP3	210910_s_at	0.52016	-0.28145	0.591422	850
OR52A1	221329_at	0.51129	-0.29718	0.591383	851
MRPS11	215919_s_at	0.44879	-0.38508	0.591354	852
ALG8	203545_at	-0.38548	0.44839	0.591311	853
MFAP1	203406_at	0.39637	-0.43871	0.591249	854
MAT1A	205813_s_at	0.44335	-0.39052	0.590817	855
TLR1	210176_at	0.40403	-0.43105	0.5908	856
PER1	36829_at	0.47944	-0.34153	0.588647	857
ESRRA	203193_at	0.43962	-0.38942	0.587294	858
IER2	202081_at	0.45685	-0.36895	0.587227	859
JMJD2B	212496_s_at	0.39597	-0.43306	0.586799	860
PIGO	209998_at	0.55403	-0.19234	0.586467	861
OCA2	206498_at	-0.34879	0.47137	0.586382	862
U08626	217202_s_at	-0.43831	0.38952	0.58638	863
HLX	214438_at	0.4621	-0.36048	0.586074	864
AL575735	221729_at	-0.50847	0.29032	0.585515	865
CCDC72	221791_s_at	-0.52016	0.26815	0.58521	866
NM_020479	208352_x_at	-0.49556	0.31008	0.584576	867
SCGB2A1	205979_at	0.46663	-0.3503	0.583484	868
CDIPT	201253_s_at	0.49355	-0.31089	0.583305	869
UTX	203991_s_at	0.43347	-0.38629	0.580617	870
SFTPC	211735_x_at	0.31069	-0.48952	0.579791	871
CSF2RB	205159_at	0.32661	-0.47823	0.579118	872
PDE4A	211901_s_at	-0.49073	0.30726	0.578986	873
TBC1D5	201813_s_at	0.42218	-0.39556	0.578536	874
SLC19A1	209777_s_at	0.44798	-0.36532	0.578053	875
KIF2A	203087_s_at	-0.43145	0.38427	0.577765	876
KLHL20	210635_s_at	0.33306	-0.47137	0.577164	877
HYOU1	200825_s_at	-0.4504	0.36048	0.576893	878
PRKCB1	209685_s_at	-0.45	0.36089	0.576838	879
NPAL2	220128_s_at	0.48508	-0.3121	0.576809	880
C1orf46	216935_at	0.45817	-0.34889	0.575885	881
SPRED2	212458_at	-0.48185	0.31492	0.575634	882
NM_012348	221382_at	0.42379	-0.38952	0.575607	883
AI286226	54632_at	0.4254	-0.3871	0.575162	884
KL	205978_at	-0.46411	0.33831	0.574327	885
PAPSS2	203058_s_at	0.45272	-0.35232	0.573659	886
DHX32	218198_at	0.475	-0.32016	0.572824	887
TOX	204529_s_at	-0.30806	0.48145	0.571572	888
GEMIN6	219539_at	0.42298	-0.38387	0.571199	889
HAPLN2	220142_at	0.40353	-0.40232	0.569823	890
TBL1X	201869_s_at	0.34204	-0.45454	0.568857	891
AMFR	202203_s_at	-0.4621	0.33105	0.568446	892
FGGY	219718_at	-0.45161	0.34516	0.568407	893
AL050026	216626_at	0.50736	-0.25474	0.567721	894
RENBP	206617_s_at	0.41058	-0.39103	0.566992	895
LILRA5	215838_at	0.44113	-0.35565	0.566642	896
LZTS1	47550_at	-0.41976	0.38024	0.566375	897
PTPRB	217177_s_at	0.45534	-0.33619	0.566002	898
DUSP10	221563_at	0.33669	-0.45484	0.565897	899
WWP2	210200_at	0.46573	-0.32137	0.565847	900
C1orf116	219856_at	0.51099	-0.24002	0.564553	901
AFF2	216364_s_at	0.47591	-0.30292	0.564137	902
ZPBP	207021_at	0.49637	-0.26734	0.563785	903
RAPGEF4	205651_x_at	-0.44637	0.34435	0.563758	904
RAMP1	204916_at	0.43831	-0.35403	0.56343	905
C7orf28A	201974_s_at	0.44607	-0.34204	0.562112	906
TSPAN2	214606_at	0.46855	-0.30988	0.561751	907
TRA@	209671_x_at	0.45242	-0.33266	0.561557	908
LRAT	220317_at	0.46129	-0.31935	0.561046	909
BG477502	203784_s_at	0.45917	-0.32147	0.560518	910
CENTG1	215080_s_at	-0.37903	0.4129	0.560491	911
NUP98	203195_s_at	0.35605	-0.43185	0.559702	912
CNPY2	202857_at	-0.40726	0.38347	0.559384	913
PURA	213806_at	0.54657	-0.11694	0.55894	914
S67777	217190_x_at	0.43175	-0.35494	0.558919	915
IFNGR2	201642_at	-0.49234	0.26452	0.5589	916
NM_025100	220726_at	0.43931	-0.34516	0.558685	917
FZR1	209414_at	0.53175	-0.16845	0.557793	918
C4orf10	214661_s_at	0.36855	-0.41774	0.557078	919
TRIP4	203732_at	0.29758	-0.47016	0.556421	920
FSD1	219170_at	-0.36573	0.41895	0.556127	921
KCNJ5	208397_x_at	0.44879	-0.32823	0.55601	922
IFNAR2	204785_x_at	0.41734	-0.36694	0.555714	923
AGTR1	205357_s_at	0.39677	-0.38831	0.555168	924
FGFR1	211535_s_at	0.27903	-0.47944	0.554726	925
C15orf39	204494_s_at	0.41734	-0.36532	0.554645	926
PDLIM4	214175_x_at	0.41452	-0.36815	0.554402	927
EIF4E2	213570_at	0.24274	-0.49839	0.55436	928
CPNE3	202118_s_at	0.35645	-0.42419	0.55407	929
NM_004908	208254_at	0.46109	-0.30585	0.553307	930
ETFA	201931_at	-0.36442	0.41563	0.552766	931
FBXO31	219785_s_at	-0.34032	0.43508	0.55237	932
VCL	200930_s_at	0.41411	-0.36492	0.551954	933
PTN	211737_x_at	-0.36935	0.40968	0.551595	934
SOX3	214633_at	0.4871	-0.25645	0.550484	935
PI4KB	206138_s_at	0.34355	-0.42823	0.549006	936
HBB	209116_x_at	-0.39677	0.37903	0.548717	937
ACTN1	211160_x_at	-0.51694	0.18105	0.547728	938
PDE4D	211840_s_at	0.4874	-0.24929	0.547453	939
RAB14	200928_s_at	0.44526	-0.31724	0.546715	940
SLCO2B1	203472_s_at	0.41694	-0.35323	0.546453	941
IGL@	215035_at	0.40675	-0.36482	0.546387	942
PFDN1	201507_at	-0.51331	0.18427	0.545383	943
AU148611	215594_at	0.46976	-0.27702	0.545357	944
NM_014104	207743_at	0.44869	-0.30937	0.545007	945
HBB	217232_x_at	-0.36331	0.40565	0.54456	946
ZDHHC17	217486_s_at	0.49113	-0.23306	0.543623	947
CST1	206224_at	0.41522	-0.3501	0.543118	948
CDK5R1	204996_s_at	0.48589	-0.23992	0.541895	949
BG546884	202551_s_at	-0.42097	0.34032	0.541326	950
HLA-DPA3	213870_at	0.34073	-0.42056	0.541265	951
TNC	201645_at	0.28911	-0.45726	0.540991	952
CR1	206244_at	0.43065	-0.32742	0.540984	953
MTERFD1	219363_s_at	-0.39758	0.36653	0.540753	954
IGFBP5	211959_at	0.35	-0.4121	0.540672	955
LYPD1	212909_at	-0.47661	0.25323	0.539706	956
PTPRR	206084_at	-0.25766	0.47379	0.53932	957
SLC11A1	217507_at	0.43266	-0.32177	0.539194	958
CREBBP	211808_s_at	0.43901	-0.3124	0.538817	959
APOH	205216_s_at	0.40706	-0.35242	0.538421	960
ZFP36L2	201367_s_at	0.26573	-0.46815	0.538309	961
VNN2	205922_at	0.35938	-0.40071	0.538259	962
POLR1D	218258_at	0.37742	-0.38347	0.538047	963
USP19	214674_at	0.45726	-0.28347	0.537998	964
HPCA	205454_at	-0.44476	0.30242	0.537838	965
TRIM26	202702_at	0.24315	-0.47944	0.537573	966
R60866	212330_at	-0.46855	0.26331	0.537467	967
COBLL1	203642_s_at	0.51976	-0.13508	0.537026	968
ALMS1	214221_at	0.41371	-0.34032	0.535699	969
HNRPDL	212454_x_at	-0.46089	0.27258	0.535462	970
RPRM	219370_at	-0.32621	0.4246	0.535442	971
MAL	204777_s_at	0.43831	-0.30726	0.53528	972
STS	203768_s_at	0.30968	-0.43508	0.534038	973
ABCE1	201873_s_at	-0.26815	0.46169	0.533912	974
USP13	205356_at	0.42621	-0.31935	0.532578	975
TMC7	220021_at	0.43145	-0.3121	0.532499	976
NCAN	205143_at	-0.42177	0.32419	0.531967	977
TBX19	206838_at	0.42782	-0.31613	0.531947	978
LRRN3	209840_s_at	-0.33952	0.40927	0.531767	979
WFDC1	219478_at	-0.43347	0.30766	0.531555	980
GNAS	212273_x_at	-0.39677	0.35363	0.531489	981
SLC1A4	209611_s_at	-0.45363	0.275	0.530476	982
AK024123	216158_at	0.4878	-0.20655	0.529728	983
MTSS1	210360_s_at	0.4503	-0.27873	0.529585	984
AU153477	202903_at	0.40847	-0.33669	0.529347	985
CAST	212586_at	0.23669	-0.47339	0.529264	986
BMX	206464_at	0.33992	-0.40565	0.529242	987
AI760629	201734_at	-0.47218	0.23508	0.527462	988
TMPRSS5	221032_s_at	0.42742	-0.30887	0.527341	989
ZNF771	221968_s_at	0.42742	-0.30847	0.527107	990
AK026465	216790_at	0.47349	-0.23095	0.526812	991
TPD52	201691_s_at	0.48145	-0.21371	0.52675	992
FAM32A	201863_at	-0.38669	0.35726	0.526464	993
CGA	204637_at	0.4125	-0.32702	0.526401	994
DLG5	210469_at	0.37661	-0.36694	0.525814	995
AJ302559	216818_s_at	0.48427	-0.20484	0.525811	996
KIAA0774	214961_at	-0.28427	0.44113	0.524791	997
LOC647070	215467_x_at	0.4121	-0.32419	0.524333	998
AL536319	212606_at	-0.50847	0.12621	0.5239	999
MMP12	204580_at	0.44748	-0.27147	0.523387	1000
COL21A1	208096_s_at	0.17016	-0.49476	0.523203	1001
P2RY10	214615_at	0.33639	-0.4003	0.522875	1002
EFCAB1	220156_at	0.35484	-0.38347	0.522456	1003
PKNOX2	222171_s_at	-0.42903	0.29677	0.52167	1004
AANAT	207225_at	0.48589	-0.18871	0.521249	1005
PIP5K1A	207391_s_at	0.37258	-0.36411	0.520953	1006
GRIK3	207454_at	0.36825	-0.36825	0.520784	1007
CDKN2D	213586_at	0.3381	-0.39556	0.520365	1008
TPP1	214195_at	0.30242	-0.42258	0.519646	1009
RGS3	220300_at	0.41573	-0.31169	0.519598	1010
AF308291	216811_at	0.31804	-0.41079	0.519517	1011
FRG1B	215160_x_at	-0.10575	0.50776	0.518655	1012
ALDH1A2	207016_s_at	0.25161	-0.45242	0.517679	1013
PIK3R1	212240_s_at	-0.35363	0.37702	0.516912	1014
TREX1	34689_at	0.45242	-0.24879	0.516314	1015
ITSN2	209898_x_at	-0.27661	0.43589	0.516249	1016
ITGA6	215177_s_at	-0.47379	0.20444	0.516016	1017
IQSEC1	203906_at	-0.34194	0.38629	0.51589	1018
IL12B	207901_at	0.35121	-0.37782	0.515845	1019
DAPK3	203891_s_at	0.45716	-0.23841	0.515591	1020
TOX3	216623_x_at	-0.43377	0.27732	0.514842	1021
GLRA3	216021_s_at	0.33014	-0.39466	0.514538	1022
IFIH1	216020_at	0.45383	-0.23609	0.511566	1023
KIF21B	204411_at	-0.44113	0.25806	0.511068	1024
C4orf41	218179_s_at	-0.39516	0.32339	0.51062	1025
DDN	214788_x_at	-0.43669	0.26371	0.510138	1026
ARID5B	212614_at	-0.39526	0.32167	0.50961	1027
C10orf76	218891_at	0.36452	-0.35524	0.508989	1028
HRBL	222126_at	0.35444	-0.36411	0.508138	1029
CD1B	206749_at	0.44153	-0.25	0.507394	1030
AL042733	213473_at	0.29919	-0.40968	0.507299	1031
AVPR1A	206250_x_at	0.40736	-0.30131	0.506685	1032
RHEB	213409_s_at	0.45736	-0.21704	0.506246	1033
CSNK1G3	220768_s_at	-0.39919	0.31129	0.506215	1034
ARL15	219842_at	-0.29315	0.4125	0.506056	1035
GCLC	202923_s_at	0.3625	-0.35202	0.505296	1036
RGR	207070_at	0.4125	-0.29153	0.50512	1037
OTUB2	219369_s_at	-0.42379	0.27298	0.504099	1038
S80491	216974_at	0.44607	-0.23256	0.503053	1039
LPPR2	64899_at	-0.39395	0.3121	0.502596	1040
HNF1A	216930_at	0.47016	-0.17621	0.502096	1041
PLXNC1	206471_s_at	0.38105	-0.32661	0.50187	1042
AK025552	216783_at	0.42056	-0.27379	0.501828	1043
CA1	205950_s_at	0.48145	-0.14113	0.501709	1044
MINPP1	209585_s_at	-0.43427	0.2504	0.501289	1045
NPAT	211584_s_at	0.39798	-0.30242	0.499846	1046
AW514267	214945_at	-0.44194	0.23347	0.499819	1047
X87344	215536_at	0.39435	-0.30605	0.499178	1048
NM_018069	218827_s_at	-0.41815	0.27258	0.499149	1049
KCNA5	206762_at	0.20937	-0.45212	0.498245	1050
LOC440434	215090_x_at	0.40323	-0.29194	0.497819	1051
CSE1L	210765_at	0.45766	-0.19355	0.496905	1052
PDC	211496_s_at	-0.40272	0.29083	0.496755	1053
ELK3	206127_at	0.36583	-0.33558	0.496433	1054
SEPT6	212415_at	0.26048	-0.42258	0.496411	1055
SMCHD1	212579_at	-0.30565	0.39113	0.496392	1056
SLC6A2	217214_s_at	0.37661	-0.32258	0.495876	1057
GRIA2	205358_at	-0.41774	0.26653	0.495525	1058
REM1	210300_at	0.39788	-0.29425	0.494865	1059
RNPS1	207939_x_at	-0.33065	0.36815	0.494837	1060
KDELR3	204017_at	0.43337	-0.23881	0.494813	1061
OR7E2P	215770_at	0.30968	-0.38589	0.494786	1062
LOC441150	215492_x_at	0.42097	-0.25968	0.494621	1063
NOLC1	211951_at	-0.37137	0.32621	0.494296	1064
C16orf42	213105_s_at	0.37177	-0.32419	0.493267	1065
AI693193	213448_at	0.4628	-0.17067	0.493267	1066
BTN2A2	205298_s_at	0.42863	-0.24315	0.492794	1067
NM_016415	208185_x_at	0.46935	-0.1496	0.492615	1068
SLC12A2	204404_at	0.4254	-0.24597	0.491392	1069
SPATA5L1	222163_s_at	0.34425	-0.3505	0.491282	1070
IGHG1	211641_x_at	0.45212	-0.19163	0.491055	1071
ICAM4	207194_s_at	0.40242	-0.27944	0.489927	1072
HLA-DPA1	213537_at	0.26935	-0.40847	0.489282	1073
G6PD	202275_at	0.42581	-0.2379	0.487761	1074
BC000265	209435_s_at	0.41895	-0.2496	0.487667	1075
EDC4	202496_at	0.34879	-0.33992	0.487032	1076
RYBP	201846_s_at	0.31532	-0.37097	0.486873	1077
CCL22	207861_at	0.4119	-0.25827	0.486174	1078
LRRC48	208140_s_at	0.33589	-0.35081	0.485685	1079
CYP2D6	217468_at	0.37026	-0.31421	0.485613	1080
U66059	216597_at	0.35645	-0.32944	0.485373	1081
SFRS7	211439_at	0.33226	-0.35363	0.485233	1082
TRSPAP1	218977_s_at	0.29526	-0.38458	0.484851	1083
NPAS2	39549_at	-0.41865	0.24042	0.482773	1084
AKR1C4	210558_at	0.40575	-0.26038	0.482111	1085
COLQ	206073_at	-0.42419	0.22903	0.48207	1086
SLC8A2	215267_s_at	-0.37177	0.30685	0.482048	1087
PPP1R3A	206895_at	0.31482	-0.36482	0.481877	1088
LOC646934	215572_at	0.3623	-0.31734	0.481628	1089
DIO2	203700_s_at	-0.42097	0.23306	0.481178	1090
RGN	210751_s_at	0.38548	-0.2871	0.480647	1091
NPAS1	216975_x_at	-0.32097	0.35645	0.479665	1092
TBXA2R	207554_x_at	0.375	-0.29839	0.47923	1093
GNRHR2	213852_at	0.35403	-0.32298	0.479222	1094
SSPN	204964_s_at	0.22742	-0.42177	0.479176	1095
SH3YL1	204019_s_at	-0.41935	0.23185	0.479175	1096
PCDH11X	210292_s_at	-0.35766	0.31855	0.478952	1097
ACTN1	208636_at	-0.40484	0.25565	0.478803	1098
RPS6KB2	203777_s_at	0.34919	-0.32661	0.478129	1099
AW408767	217608_at	0.41129	-0.24153	0.476966	1100
GABRA5	217280_x_at	0.47611	-0.01421	0.476322	1101
RUNX1	211180_x_at	0.40877	-0.24304	0.475564	1102
CLCNKB	205985_x_at	0.26351	-0.39556	0.475295	1103
ROBO3	219550_at	0.41411	-0.23226	0.474797	1104
GNAZ	204993_at	0.44879	-0.14798	0.472557	1105
FPGS	202945_at	0.39879	-0.25242	0.471963	1106
SMAD3	205398_s_at	0.39919	-0.24798	0.469943	1107
HIST2H4A	207046_at	0.28468	-0.37339	0.469535	1108
C20orf19	219961_s_at	-0.32097	0.34194	0.468983	1109
JPH2	220385_at	0.40151	-0.24143	0.468507	1110
AL138752	204656_at	0.39194	-0.25565	0.467946	1111
ABCB1	209994_s_at	-0.39637	0.24516	0.466061	1112
RAB38	219412_at	0.40343	-0.23286	0.465811	1113
ARHGAP19	212738_at	0.24798	-0.39315	0.464824	1114
AGXT	210327_s_at	0.33034	-0.32591	0.464049	1115
HOXA9	214651_s_at	0.27016	-0.37581	0.462839	1116
PTK6	206482_at	0.35161	-0.3004	0.462461	1117
TOX3	215108_x_at	-0.39556	0.23911	0.462213	1118
UBA3	209115_at	-0.39274	0.24355	0.462127	1119
ZNF142	204474_at	-0.35081	0.29879	0.460807	1120
MAB21L1	206163_at	0.40393	-0.22147	0.460661	1121
TTC17	218972_at	0.34476	-0.30363	0.459402	1122
EWSR1	209214_s_at	0.28871	-0.35565	0.458083	1123
PKP1	205724_at	0.32702	-0.31976	0.457371	1124
SAP30	204900_x_at	0.24476	-0.38589	0.456967	1125
DOK4	207747_s_at	-0.36452	0.2746	0.456377	1126
YIF1A	202418_at	0.31532	-0.32984	0.456313	1127
FASTKD3	219200_at	-0.26169	0.37379	0.45629	1128
C4orf8	203600_s_at	0.36532	-0.27218	0.455566	1129
NM_006276	201129_at	-0.42581	0.15806	0.454199	1130
SERHL2	217276_x_at	0.35252	-0.28538	0.453555	1131
WDFY3	212598_at	-0.33871	0.30081	0.453002	1132
SMU1	218393_s_at	-0.4254	0.15484	0.452704	1133
KIF17	222144_at	-0.24839	0.37823	0.452499	1134
MDS1	208434_at	0.27429	-0.35897	0.451768	1135
SLC34A1	217530_at	0.36452	-0.26532	0.450854	1136
DYNC1I2	211684_s_at	-0.40081	0.20524	0.450302	1137
ADH1C	206262_at	0.24304	-0.37873	0.450005	1138
HBG2	213515_x_at	-0.32903	0.30685	0.449909	1139
SNX11	220140_s_at	0.31815	-0.31613	0.448506	1140
E2F3	203692_s_at	0.38508	-0.22984	0.448456	1141
LL22NC03-75B3.6	52837_at	-0.27056	0.35726	0.448149	1142
PDSS2	219307_at	0.26008	-0.36452	0.447791	1143
CASP9	210775_x_at	0.24274	-0.375	0.446708	1144
X60592	35150_at	0.34677	-0.28145	0.446613	1145
ITM2A	202746_at	-0.38377	0.22813	0.446456	1146
DOCK4	205003_at	-0.41371	0.16532	0.445518	1147
B3GALT2	210121_at	-0.22581	0.38387	0.445361	1148
C3orf60	209177_at	-0.34839	0.2754	0.444095	1149
HIST1H2AE	214469_at	0.31048	-0.31694	0.443676	1150
THOP1	203235_at	0.38054	-0.22631	0.442749	1151
CYP19A1	203475_at	0.34234	-0.27863	0.441397	1152
TNKS	217121_at	0.34516	-0.2746	0.441068	1153
ADAM3B	217237_at	0.38286	-0.21774	0.440446	1154
CADM4	222293_at	0.38548	-0.2125	0.440172	1155
AI201594	43511_s_at	-0.36663	0.24204	0.439319	1156
NID1	202008_s_at	0.37379	-0.23024	0.43901	1157
UGCG	204881_s_at	0.2504	-0.35968	0.438258	1158
ITGB3	204626_s_at	0.37056	-0.23266	0.437545	1159
CASP5	207500_at	0.40806	-0.15685	0.437167	1160
PSME4	212220_at	0.34073	-0.27218	0.436095	1161
GABRQ	220886_at	0.33105	-0.28387	0.436092	1162
PAX5	206802_at	0.39153	-0.19153	0.435866	1163
NEUROD4	221318_at	0.34355	-0.26815	0.435811	1164
KPNA1	213741_s_at	0.31331	-0.30242	0.435455	1165
SLC7A11	209921_at	0.08548	-0.42581	0.434305	1166
HLA-DPB1	201137_s_at	0.36048	-0.24194	0.434144	1167
ATP11A	215842_s_at	0.35323	-0.25202	0.433919	1168
HLA-B	208729_x_at	-0.39315	0.18306	0.433679	1169
HMGN3	209377_s_at	0.24274	-0.35927	0.433587	1170
SPAG6	210033_s_at	0.34073	-0.26653	0.432591	1171
MCTP1	220122_at	-0.33871	0.26855	0.432254	1172
RNMT	202684_s_at	0.42379	-0.08427	0.432087	1173
ING2	205981_s_at	0.39274	-0.17661	0.430623	1174
NPAL3	210267_at	0.38387	-0.19435	0.430265	1175
AL109698	37590_g_at	0.38911	-0.18185	0.429507	1176
MRPS12	210008_s_at	0.42177	-0.07298	0.428037	1177
MPHOSPH10	212885_at	-0.40081	0.14919	0.427675	1178
TNFSF11	210643_at	0.35696	-0.23498	0.427359	1179
GNAS	200780_x_at	-0.34476	0.25161	0.42681	1180
MGLL	211026_s_at	-0.33992	0.25806	0.426779	1181
CCND3	201700_at	0.23992	-0.35242	0.426335	1182
SLC25A36	201917_s_at	0.36532	-0.21815	0.425498	1183
LMAN2	215656_at	0.3622	-0.22228	0.424967	1184
EIF2AK1	217735_s_at	-0.33347	0.26169	0.423891	1185
RUNX2	216994_s_at	0.32823	-0.26774	0.42358	1186
RANBP2	201713_s_at	-0.37903	0.18831	0.423231	1187
RBMS1	203748_x_at	-0.40081	0.13427	0.422702	1188
GPC5	207174_at	-0.24516	0.34234	0.42107	1189
GCAT	205164_at	-0.34032	0.24476	0.419196	1190
MACF1	208633_s_at	-0.41855	0.02218	0.419137	1191
KCNJ10	206692_at	0.38387	-0.16653	0.418436	1192
CDC27	217881_s_at	-0.34194	0.24032	0.417943	1193
AF202635	211435_at	0.35	-0.22702	0.417179	1194
SUV39H1	218619_s_at	0.37137	-0.18992	0.417115	1195
CEPT1	219375_at	-0.41129	0.05726	0.415257	1196
ECH1	200789_at	-0.4121	0.05081	0.415221	1197
PI4K2A	209345_s_at	0.36089	-0.20484	0.414971	1198
DR1	209187_at	-0.37137	0.18468	0.414756	1199
RFXAP	208492_at	-0.14829	0.38639	0.413869	1200
FGFR3	204379_s_at	0.33387	-0.24435	0.413734	1201
AW851559	216056_at	0.30847	-0.2754	0.41352	1202
PAX8	207924_x_at	0.25413	-0.32389	0.411688	1203
MYCN	209757_s_at	0.21855	-0.34879	0.411605	1204
POLG	217636_at	0.33427	-0.2371	0.409821	1205
FLJ39739	217136_at	0.37258	-0.17016	0.409598	1206
LTBP1	202728_s_at	0.26361	-0.31099	0.407682	1207
MYB	215152_at	0.34879	-0.21008	0.407171	1208
PRDM2	216445_at	0.33488	-0.23125	0.406966	1209
SIGLEC8	216327_s_at	-0.25565	0.31532	0.405935	1210
ZNF506	221626_at	0.3004	-0.27298	0.405904	1211
ADORA2B	205891_at	-0.35806	0.19113	0.405879	1212
FCGR2C	210992_x_at	0.27631	-0.29607	0.404975	1213
RPL31	200963_x_at	-0.2004	0.3504	0.403659	1214
RBCK1	221827_at	0.34516	-0.20887	0.403438	1215
ZNF276	213778_x_at	0.38871	-0.10685	0.403128	1216
BAHD1	203051_at	0.34597	-0.20685	0.403091	1217
CSGlcA-T	55093_at	-0.27702	0.29274	0.403034	1218
C6orf106	217924_at	-0.15958	0.36966	0.402634	1219
EGR1	201693_s_at	0.25081	-0.30927	0.398188	1220
AKAP4	207019_s_at	0.22742	-0.32621	0.397659	1221
VNN3	220528_at	0.35736	-0.17329	0.397159	1222
AF009267	215908_at	0.37661	-0.11895	0.394948	1223
DCUN1D4	212851_at	-0.35081	0.17863	0.39367	1224
DENND4A	214787_at	-0.36865	0.137	0.393283	1225
NDRG2	214279_s_at	-0.33185	0.20726	0.391256	1226
SLC35A1	203306_s_at	-0.33306	0.20524	0.391219	1227
SIRT6	219613_s_at	0.23629	-0.30726	0.38761	1228
TAF2	209523_at	-0.29516	0.24919	0.386284	1229
UBE2I	213536_s_at	0.29607	-0.24607	0.384978	1230
DDX18	208897_s_at	-0.36492	0.12097	0.384448	1231
GPR17	215225_s_at	-0.37772	0.06623	0.383482	1232
AF118091	208849_at	0.3371	-0.18226	0.383217	1233
HSD17B6	37512_at	-0.30766	0.2254	0.381392	1234
SAP30BP	217965_s_at	0.28952	-0.24798	0.381203	1235
PCGF2	203793_x_at	0.34597	-0.15847	0.380536	1236
RBM4	200997_at	-0.37903	-0.02903	0.38014	1237
AI922605	211980_at	-0.3625	0.10444	0.377245	1238
KLRA1	207229_at	-0.1499	0.34446	0.375663	1239
HLA-DQA1	203290_at	0.28427	-0.24476	0.375123	1240
RRAD	204803_s_at	0.32591	-0.18558	0.375043	1241
CASP8AP2	222201_s_at	-0.31331	0.20565	0.374773	1242
KCNC3	207600_at	0.3626	-0.08579	0.372611	1243
PDIA6	207668_x_at	-0.36048	0.09315	0.372321	1244
CGGBP1	214050_at	0.3246	-0.18185	0.372068	1245
C18orf1	209574_s_at	0.2379	-0.28548	0.371612	1246
C14orf109	213246_at	0.23992	-0.28347	0.371372	1247
TRIB1	202241_at	-0.36532	0.03185	0.366706	1248
CCDC52	215094_at	0.23185	-0.28347	0.36621	1249
CD72	215925_s_at	0.34758	-0.11452	0.36596	1250
AK024860	215406_at	0.30645	-0.1996	0.365721	1251
ITGB1	216178_x_at	0.28145	-0.23266	0.365164	1252
CDH1	201130_s_at	0.28024	-0.23347	0.36475	1253
NENF	218406_x_at	0.22581	-0.28508	0.363677	1254
PLA2G10	207222_at	0.33871	-0.13145	0.363323	1255
AF068863	206909_at	0.32349	-0.16381	0.362601	1256
FLT3LG	206980_s_at	0.34708	-0.10413	0.362364	1257
COPZ2	219561_at	0.20323	-0.29839	0.361025	1258
PADI4	211412_at	0.22359	-0.28327	0.36088	1259
DDC	205311_at	0.16895	-0.31774	0.359865	1260
DGCR11	215725_at	0.27379	-0.23347	0.359818	1261
TRPC2	215288_at	0.2379	-0.26815	0.35847	1262
SCML2	206147_x_at	0.3375	-0.11935	0.357981	1263
ALDOB	217238_s_at	0.2629	-0.24274	0.357826	1264
PEX16	221604_s_at	-0.31895	0.16089	0.357232	1265
FGFR1OP	205588_s_at	-0.2871	0.21008	0.355753	1266
UTS2	220784_s_at	0.34919	-0.06774	0.3557	1267
PARP1	208644_at	-0.35202	0.025	0.352907	1268
CRP	205753_at	0.19355	-0.29395	0.351949	1269
GJA5	214466_at	0.23216	-0.26442	0.351875	1270
UBE3B	213822_s_at	0.34677	-0.03185	0.34823	1271
GPR64	206002_at	0.09597	-0.33468	0.348168	1272
ANKHD1	219081_at	0.33226	-0.10121	0.347333	1273
KIAA1012	207305_s_at	-0.31694	0.1371	0.345322	1274
M69039	216962_at	0.31492	-0.14073	0.344934	1275
TNRC4	215045_at	-0.30323	0.16411	0.344791	1276
LUZP4	220665_at	0.27863	-0.20202	0.344161	1277
DLX2	215685_s_at	-0.25968	0.22581	0.344128	1278
HPR	208470_s_at	0.27984	-0.19919	0.343492	1279
TTK	204822_at	-0.33427	0.07823	0.343302	1280
CHRNA9	221107_at	0.26855	-0.21371	0.343207	1281
PRMT2	210384_at	0.28024	-0.19718	0.342658	1282
TNNC2	205388_at	-0.28962	0.18095	0.341501	1283
RIN3	222069_s_at	0.29183	-0.17631	0.340954	1284
DLEC1	206798_x_at	0.26976	-0.20806	0.340675	1285
DAZAP2	214334_x_at	0.22379	-0.25524	0.339455	1286
DNAJA4	220395_at	0.24153	-0.2375	0.338737	1287
ICA1	207949_s_at	0.00927	0.33548	0.335608	1288
GNB1L	220762_s_at	-0.25121	0.22218	0.335366	1289
NM_018546	207478_at	0.11774	-0.31008	0.331681	1290
C1orf21	221272_s_at	-0.26008	0.20524	0.331308	1291
RBM5	201394_s_at	-0.33024	0.0004	0.33024	1292
MCAM	209086_x_at	0.30847	-0.11774	0.330176	1293
MAPK1	208351_s_at	0.2621	-0.1996	0.329449	1294
RIPK5	211514_at	0.2378	-0.22591	0.328	1295
CCT8L2	220508_at	0.30978	-0.10353	0.326622	1296
PIP5K1C	212518_at	-0.29153	0.14194	0.324248	1297
SLC4A4	203908_at	-0.2496	0.20565	0.323407	1298
ADAM30	221446_at	0.21694	-0.2379	0.321962	1299
PSME3	209853_s_at	-0.22379	0.22984	0.320793	1300
NM_024614	219871_at	-0.27258	0.16694	0.319639	1301
PCIF1	89948_at	0.24839	-0.2	0.318901	1302
GCH1	204224_s_at	-0.29395	0.12298	0.318639	1303
RSU1	215618_at	0.22409	-0.22248	0.315775	1304
ATP8A2	219660_s_at	-0.08266	0.30444	0.315462	1305
TP53I3	210609_s_at	0.26492	-0.17097	0.315299	1306
NRP2	219367_s_at	0.29234	-0.11694	0.314861	1307
CNOT1	200861_at	0.2621	-0.16613	0.310315	1308
AP3S2	202398_at	0.2121	-0.22339	0.308041	1309
IRF8	204057_at	-0.30605	0.01089	0.306244	1310
DET1	219641_at	0.28014	-0.11784	0.303916	1311
AL110223	216534_at	0.26573	-0.14194	0.301263	1312
PLXNB2	211472_at	0.25655	-0.15595	0.30023	1313
TGFB2	209909_s_at	0.17016	-0.24677	0.29975	1314
FXR2	35265_at	-0.28659	0.07893	0.29726	1315
AL520908	217833_at	0.29597	0.02016	0.296656	1316
PTEN	211711_s_at	-0.26018	0.13962	0.295275	1317
WWP1	212637_s_at	-0.21411	0.20242	0.294647	1318
PIN4	214224_s_at	0.19919	-0.21694	0.294516	1319
PSMB2	201404_x_at	0.29274	0.02903	0.294176	1320
CLIC5	217628_at	0.20968	-0.20121	0.290605	1321
MEG3	212732_at	-0.28024	0.07097	0.289087	1322
IRF2BP1	213771_at	0.21129	-0.19315	0.28627	1323
CMKLR1	210659_at	0.1996	-0.20202	0.283993	1324
GNA14	220108_at	-0.27621	-0.06089	0.282842	1325
CTDSPL	201905_s_at	0.09738	-0.26431	0.281678	1326
PEX11A	205160_at	0.09234	-0.26169	0.277504	1327
HTR2A	211616_s_at	-0.23387	0.14637	0.275897	1328
CCDC6	204716_at	-0.23145	0.14597	0.273635	1329
AB028239	217357_at	0.26371	-0.06452	0.271488	1330
STARD3	202991_at	0.19879	-0.18347	0.270516	1331
UBE2B	202334_s_at	-0.17258	0.20565	0.268469	1332
GPATCH3	218895_at	0.18226	-0.19677	0.268211	1333
PER2	205251_at	0.21089	-0.1629	0.266479	1334
HPGD	211549_s_at	0.18508	-0.18992	0.265187	1335
KRT19P2	217350_at	0.26421	0.01966	0.26494	1336
DNAI2	220636_at	0.09304	-0.24143	0.258737	1337
USP9Y	206624_at	-0.21562	0.1255	0.249484	1338
C5orf30	221823_at	-0.22621	0.10282	0.248481	1339
HIGD1B	219719_at	-0.22984	-0.08871	0.246365	1340
DLGAP4	202570_s_at	-0.16381	0.18357	0.246032	1341
RAB35	205461_at	-0.01895	0.24153	0.242272	1342
CCDC131	213065_at	-0.20887	-0.12177	0.241774	1343
RAP2C	218669_at	-0.22702	0.07298	0.238462	1344
KANK2	221068_at	-0.23629	0.02823	0.23797	1345
CDC34	212540_at	0.19556	-0.12944	0.234517	1346
TRPM3	216489_at	0.18881	-0.12974	0.229089	1347
MASP2	216968_at	-0.22137	0.05484	0.228062	1348
SERGEF	220482_s_at	-0.21492	0.06815	0.225466	1349
APBB3	204650_s_at	0.18952	-0.11169	0.219983	1350
LOC90379	221851_at	0.2003	-0.08417	0.217266	1351
C16orf57	218060_s_at	0.19083	-0.08841	0.210315	1352
CHAF1A	203975_s_at	0.12016	-0.17218	0.209963	1353
SHANK2	213307_at	-0.12742	0.16532	0.208726	1354
POLDIP3	210583_at	0.14849	-0.14103	0.20479	1355
GRIP2	216481_at	-0.15645	0.12258	0.198752	1356
DIABLO	219350_s_at	0.18306	0.06411	0.193961	1357
MFHAS1	213457_at	0.18306	-0.06008	0.192667	1358
BE561479	212581_x_at	-0.17944	0.00323	0.179469	1359
ULBP2	221291_at	0.16058	-0.07349	0.176598	1360
C20orf111	209020_at	0.12258	-0.12581	0.175653	1361
AKR1B1	201272_at	0.11169	-0.12137	0.16494	1362
ALPP	211619_s_at	0.14728	0.05937	0.158796	1363
PIK3C2A	213070_at	-0.14113	0.06694	0.156201	1364
RPL23A	203012_x_at	-0.07419	-0.12742	0.147445	1365
NM_018601	220880_at	-0.05242	0.12379	0.134431	1366
BF691447	221484_at	0.11613	0.05645	0.129123	1367
SLC23A2	209237_s_at	-0.1125	-0.01774	0.11389	1368
MED6	207078_at	0.08306	-0.05565	0.0999794	1369
ALDH8A1	220148_at	-0.01452	0.0879	0.0890912	1370
TIA1	201447_at	-0.04879	0.04113	0.0638133	1371
TNKS	216695_s_at	0.01371	-0.04113	0.0433548	1372

## Sheet: 1372 probes - expression values
This dataset contains the 1372 probes with the expression values as retrieved from the GEO. The order of the samples and probes were not modified.
	0	0	0	0	0	0	0	0	0	1	1	1	1	1	1	1	2	2	2	2	2	2	2	2	3	3	3	3	3	3	3
	GSM21215	GSM21217	GSM21218	GSM21219	GSM21220	GSM21221	GSM21226	GSM21231	GSM21232	GSM21204	GSM21205	GSM21216	GSM21222	GSM21225	GSM21228	GSM21233	GSM21209	GSM21210	GSM21211	GSM21214	GSM21223	GSM21224	GSM21227	GSM21230	GSM21203	GSM21206	GSM21207	GSM21208	GSM21212	GSM21213	GSM21229
200076_s_at	702.4	957.2	689.2	896	747.4	805.6	870	859.4	1072.6	940	1620.9	826.3	747.1	854.3	1087.5	687.9	1093.9	916.5	1038.1	865.1	891.4	818.8	1064.5	786.2	1033.3	912.3	1384.7	1081.1	937	1066.6	962.5
200086_s_at	5250.8	5863.6	4562.4	4959.3	4484.8	6203.8	3662.2	4053	3664.2	4722.5	3594	5296.9	4230.4	3883.7	3801.1	4956.2	3838	6114.4	4561.8	4847.2	4162.7	4440.3	4905.1	3303.5	3136.5	3318.4	1509.3	3331	3398	2160.2	5217.8
200606_at	151.7	118.5	148.1	159.9	127.4	105.5	179.6	261.3	358.6	196.9	278.5	194.1	231.9	121.2	136	163.4	163.2	227.8	187.3	223	394.6	470.6	352.5	272.9	278.4	404.7	64.6	765.6	269	383.8	264.5
200615_s_at	991.3	928.7	709.9	916	1046.3	919.6	1095.1	879.7	755.3	643.7	440.4	1001.1	800.2	1086.3	790.6	578.8	667	910.5	704.8	615.1	755.4	735.9	866.2	475.9	751.9	1038.1	503.6	730.7	521.1	650.6	539.5
200622_x_at	2180.1	1456	1356.3	1261.5	1016.3	2252	1348.2	1261.6	1111.9	701.4	1531.6	2375.5	1596.8	1337.1	1502.5	2202.8	1182.2	1451	1010.4	1257.8	1156	1027.6	1108.1	998.3	699.5	693	948.6	1011.1	682.2	935.8	1362
200639_s_at	5458.3	7663	5732.4	4492.2	5561.5	9092.3	3253.1	3237	4200.8	4351.8	4133.8	11074.5	8616.7	5959.1	3975.7	4997.5	6041.4	8185.8	4186.9	6491.9	5406.1	4634.4	4341.1	3537.9	2140.3	2769.2	1914.6	3016.4	2958.3	1965.3	7607.9
200650_s_at	6240	5413.8	6385.4	5990.8	6181.5	6385.5	4196.6	5940.1	4324.8	4095.7	1665.3	7256.3	6468.4	4363.8	4169	6962.2	3306.4	4668.4	3512.5	5180	5236.9	3781.6	3217.7	3732.2	3283.8	3853.3	972.4	3619.8	2094.1	2943.4	5524.6
200677_at	1630.4	2335.9	1963	2684.6	2793.1	1791.2	3342.3	2208.1	2791.7	2761.9	1842.7	1837.8	3790.4	2889	3103.2	1296.8	3432.8	2892.2	3915.9	2296.9	3994.6	4522.9	2644.5	3290.8	3542.5	3371.9	2560.4	3676.9	4985.5	4639.8	2998.6
200704_at	748.5	719.9	539.7	1264.4	991.3	685.7	987	1724.8	1320.4	533.1	995.5	748.1	990.7	2955.2	1370.4	817.3	1098.6	1273.4	569.1	625.7	901	2024.3	1345.7	1290	1301.2	1435.8	1534.7	1471	1181.6	2084	1440.6
200708_at	3391.6	2771.1	2519.5	2221.8	2638.7	2657.1	2211.9	2125.3	2393.5	2320.8	1434.6	3485.6	2313.6	2005.6	2429.9	3157.9	1629.5	2638.3	1398.8	2002.5	1956.4	1708.2	2178.5	1394.9	2192.2	1500.4	1424.6	2233.3	1634.6	2015.7	2386.7
200726_at	2700.2	2667	1970.9	2166.9	2335.1	2124.1	3098.6	2049.7	2470.5	4280.3	840.7	1574.3	2562.7	1828.2	2113.1	3022.5	2289.4	1995.2	2552.9	2250.7	2677.8	3153.9	2815.4	3645	3645.2	3403.5	2056.3	3009	2779.3	3438	2928.8
200734_s_at	7889.2	9266.1	5176.1	6232.6	5806	6867.7	4375.6	5348.8	4561.3	5097.2	5538.5	6891.4	4673.9	4730.8	3265.6	5862.9	4927.9	6469.2	4908.1	5511	4122.5	3034.7	3964.3	3088.8	4672.2	3614	2202.3	5923.9	1863	3553.4	3620.4
200780_x_at	15503.8	18440.2	16393	14893.2	18323.7	16014.6	13568.3	14170.8	15354.9	17733.9	12923.3	12929.7	15290.8	11895.6	10860.5	16518.7	15791.3	15268.8	19086.3	16365.1	11678.3	15764.9	13627.2	13116.5	17125.4	10218.1	5616.1	18148.7	9977.1	12639.3	13210
200789_at	627.2	636.4	715.3	932.4	901.9	746.3	904.5	907.3	783.5	624.8	708.4	772.8	935.3	755.9	653.5	643.9	733.4	605.9	750.8	798.1	700.2	677.5	659.5	581.5	993.1	538.5	494.2	602.3	943.9	430.2	555.8
200793_s_at	3375.9	2800	4260.5	2603.3	3524.3	3123.6	3646.6	2737.6	2339.3	1538.4	2195.6	3526.6	1750.4	3715.7	2427.6	3518.8	2232.6	2413.3	1718.2	1834.3	2083.8	2034.2	1151.8	1561.3	1673.2	1756.6	1507.7	2025	2762.1	2647	1819.3
200825_s_at	3511.8	4421	3268.3	3392.9	3962.8	3646.1	3220.1	3694.3	3648.6	4781.3	5222.4	3606.4	3253.4	2747	2825.7	3520.5	4205.2	3950.5	3484.3	3671	3183.1	2323.2	3308.3	2062.1	2838	2722.1	2502.2	3406.9	3028	3352.2	2777.9
200861_at	370	402.4	643.4	626.2	400.4	521.4	632.4	555.7	647.6	629.6	634.6	504.8	738.2	630.9	618.8	707.8	613.7	654.7	585.5	714.7	467.6	654.2	567.2	636.9	678.3	480.3	1042.4	824.1	578.6	889.6	664.5
200904_at	450.8	766.6	690.4	1154.4	651.1	859.6	518	1098.1	1025.6	510.5	1348.1	628.3	922.4	788.6	924	740.7	2202.4	737.8	1180.3	642.9	672	1752.9	1135.4	1205.9	1534	1210.8	786.9	616.9	1282.5	1293	1456.6
200925_at	12036.1	13623.7	11730.8	9967.1	14876.9	15778.3	11328.5	14061.1	11105.7	7851.1	9210.4	13314.2	12175.7	12300.7	8357.1	17268.1	7733.2	12635.9	9587.1	12182.8	8980.5	11376.7	13193.2	9400.4	8120	9385.7	3045.9	8983	6617.4	5945.9	10238.4
200928_s_at	97.3	130.8	160.3	148.4	133	143.4	151.6	172.3	162.2	215.8	259.3	165.1	151.2	170.4	180.3	243.2	242.7	215.8	160.6	219.3	181.2	138.5	188.9	167.3	202.4	135.1	238.2	172.6	233	235.9	190.9
200930_s_at	9.9	10.6	13.7	9.5	9	7.3	20.8	10.3	11.8	16.7	18.5	8.5	18.2	51.6	19.5	12.5	11.9	15.6	83	67.4	7.6	20.2	21.3	10.8	18.9	74	27.5	13	15.5	15.4	15.7
200945_s_at	1844.6	2045.1	2479.6	2275.4	2481.5	2078.6	2154.7	2302.5	1829	1854	1460.1	1955.5	2174.8	2101.2	2057.6	2202.6	1884.2	2042.5	1927.7	2395.8	1518.6	1948.4	2251.5	1645.2	1826.1	1805.6	936	1639.4	1405.7	1396.7	2243
200946_x_at	2098.1	1184.5	2549.8	1655.1	3382.3	2920.6	2532.7	2123.8	2805.1	1520.3	2394.2	2402.1	3119.1	1903.1	2600.7	1486.6	1313.5	2112.4	2247.6	1841	2959.6	3262.3	1644.4	1973.7	1045.6	1241	1103.6	1616.6	1943.5	1582.5	1630.4
200963_x_at	13708.6	14455.7	13639.1	10523.9	13994.3	12639.1	18879.2	16069.2	12826.3	12883.7	14549.8	11258.6	11263.9	14927.1	13114	15542.7	7624.4	10158.9	6430.2	11098.3	9774.6	13974.1	16495.8	12913.7	10431.8	12595.9	8475.8	12119.5	6999.5	12395.1	12102.4
200975_at	3834.8	2969.9	3342.8	4601.5	4180.4	3477.7	3445.3	3047.8	3335.7	3820.3	3044.8	3947.4	3537.4	3634.7	3659.8	5074.8	3412.8	3712.8	3457.4	3082.4	3581.4	4561.2	2626.1	3232.2	2712.2	2650.2	1614.2	2780.9	2689.2	2776.9	3731.5
200980_s_at	1229.8	1379	1613.5	1434.7	1269.5	1403.4	1392.8	1287.8	1252.6	1307.6	1210.6	1242	1186.9	1351.5	949.6	1497.3	1265.4	1207.7	1271	1399.3	979.1	987.3	939.3	1117.7	1125.6	865.5	1095.7	1028.9	1036	883.6	1162.3
200981_x_at	13994.7	19135.1	17638.8	15601.3	16737.5	16042.4	13499.9	13082.5	14580.5	17886.7	11282.1	13759	14942.8	11177.3	9284.6	13880.8	16268.6	12802.8	19165.7	13298.4	11389.2	14602.8	12474.5	12475.5	12165.5	10989.6	4690	16349.8	8314.7	9984.5	12507.4
200997_at	758.4	1131.4	1023.3	1130.6	1185.1	817.5	1443.3	1202.5	753.9	1270.1	526.7	795.4	683.2	862	810.5	820.3	712.1	1105.8	1372.2	890	822	609.2	1387.5	704.2	1283.7	1876.3	540.4	740.7	458.7	469.6	699.4
201088_at	3149.7	3376.8	2379.2	2752.9	2308.3	2752.4	1735.2	2013.2	2226.8	2215.3	1334.7	2576.2	1809.5	1797.9	2882.2	1963.5	1246.7	2435.3	1283.4	2066.2	1587.3	1384.2	1971.4	1370.7	1598.1	1575.4	859.9	2045.6	1431.9	1725.2	1861.5
201125_s_at	480	523.6	328.6	785.9	446.2	422.1	687.1	411.3	395.9	758.3	785.5	299.5	691.8	470.2	650.3	621.7	886.6	583.2	726.5	488.9	866.8	676.1	574.5	829.1	848.2	979.7	1020.3	871.7	1359.1	1196.2	404.8
201129_at	1587.6	1558.4	1159.4	1186.1	1375.3	1081.4	1536.1	1036.3	1060.4	1283.5	592	1013.2	939.9	1086.4	1011	1080.7	750.4	1103.6	1115.6	1064.1	814.6	968.2	1670.6	897.1	1378.7	1409.6	711.7	978.7	679	983.2	921.1
201130_s_at	25.4	11	5.5	3.9	16	11.5	17.1	61.9	78.2	18.4	32.5	9.8	69.6	37	20	76.6	18.8	46.1	18.5	10.9	60.7	11	63.9	78.1	26.5	33.8	61.9	68.7	20.5	25.3	52
201137_s_at	703.2	573.1	1528.6	1881.3	720.5	1016	967.3	1908.4	1187.9	1264.3	2228.3	1684	2003.8	2450.3	2443	2184.9	1253.8	1575.9	970.4	585.9	1686.4	2166.2	1651.3	2337.5	1945.4	1874.1	1522.4	1344.2	1990.8	1833.4	2085.6
201170_s_at	1585.9	1813.2	2697.8	2030.8	1792.9	2646.5	1292.4	3213	1618.2	1410.8	2463.1	3064.9	1981.8	1353.8	1495.8	2397.6	1218.4	1333.2	1796	2338.6	1887	1458.9	1390.1	1483.9	1272	1562.2	125.1	1358.9	1541.7	2245.4	1451.8
201226_at	2459.2	2225.6	4292.9	2586	2751.1	3263.8	2707.5	2333.8	2148.3	1923.5	1989	3136	2268.3	2603.4	1854.2	2904	1482.7	2207.8	3113	2762.2	1763.3	1768	2414.2	1812.3	1372.6	1524.1	1132.6	1856.6	1512.3	1267.2	2618.6
201241_at	1502.5	1358.9	1513.3	1184.2	1179.2	1730.6	1335.3	1294.4	1064.3	1283.5	457.4	1511.7	1508.9	1410.1	921.6	1315.4	722.3	1113.4	776.8	1388.6	935	979.5	915.1	1009.9	794.7	1088.2	621.4	1161.3	722.8	733.1	1432.6
201253_s_at	3178.6	5376.1	2016.7	2124.2	2065.8	1812.3	1818.5	1460	2356.2	3621.5	3709	2117.3	1623.4	1712.6	1858.4	1587.4	4630.4	2921.3	2831.8	2150.9	2150.1	1910	2355.5	2257.6	4708.9	2348.6	4405.1	2770.2	2572.1	2725.7	2357
201268_at	2074.5	1595.7	1785	1896.7	2283.1	2352.3	1904.1	1930.5	1750.2	1086.6	1355.4	2186.1	1812.9	2074.9	1739.3	1629.7	1375.1	1867.1	1839.8	1648.8	1620.8	1801.5	2075.8	2151.1	1576	1169.7	867.5	1107.8	1361.4	1762.6	1719.4
201272_at	2092.1	2060.5	1960.3	2104.6	1782.3	2226.1	1697.3	1827.4	2087.9	2075.9	1769.6	2365.1	1719.9	1877.5	2074.7	1896.9	1724.7	2002	1457	1725.1	2015.9	2019.7	1963.1	1994.2	2414.5	2446.3	2084.2	2704	1737.7	2234.8	2294.5
201287_s_at	143	163.4	122.8	192.5	172.2	221.1	290.3	159.1	477.2	220.7	314.3	167.5	211.3	219.2	349.3	222.1	166.8	212.7	170.7	155.1	211.8	206.7	301.9	74.9	366.3	225.9	491.6	350.6	292.2	399.9	225.1
201305_x_at	529.9	748.4	492.5	1073.1	1135.1	341	760.9	674.1	728.1	1009.3	697.1	474.4	804.4	1055.9	1319.5	591	896.9	686.1	1089	695.7	942	1295.5	1974.8	2140.6	1341.8	1240.6	1807.7	780.6	1241.7	1167.1	1191.9
201318_s_at	1747.4	1575.8	1454	1416	1217.7	1660.1	1309.2	1508.9	1168	777.1	1208.5	2067.5	1572.7	1445.8	1533.7	1190.7	646.5	1075.6	722.5	1141.6	1187.8	1768.9	1192.6	1510.5	786.7	1133.6	244.4	1266.4	706.2	657.3	1616.8
201367_s_at	147.4	100.5	111.6	187.8	123.5	130.8	128.7	186.9	154.3	202.4	144.2	95.8	136.2	91.9	191.1	213.1	95.4	164	172.3	116.6	129.1	234.5	183.9	152.5	398.5	115.5	64.3	488.6	218.4	264.6	192.1
201368_at	1088.6	753.2	1417.6	1817.1	1243.1	1278.9	1778.3	2440.4	1557.9	1974.4	1238	1424.3	1698.9	1645.8	2020.7	1617.4	1208.3	1485.1	1804.8	1066.5	3340	2545.4	2217.3	3170.5	2454.2	1957.1	803.1	2326.8	2134.1	3998.2	1861.5
201394_s_at	466.8	489.5	882.5	632.9	845.2	887.3	1060.3	1030.4	947.1	547.8	686.9	696.4	604.7	1250.7	887.6	725.4	617	908.8	750.1	705.9	742.2	961.1	959.2	809.1	568.1	797.5	441	518.1	727.5	534.3	761.3
201396_s_at	225.8	402.7	331.6	361.6	331.5	305.8	392.4	242.7	85	356.2	783.1	176.6	115.5	333.8	475.6	312	623.7	367.5	315.4	210.3	401.5	329.1	517.4	365.9	433.6	454.7	1164.2	197.9	634.3	678.3	300.3
201404_x_at	450.6	597.5	464.1	301.9	509.6	455.3	437.3	367	114	262.3	647.3	376	750	361.4	598.2	766.6	551.4	595.5	391.4	644.5	309.8	308.4	691.3	440.2	385	253	823.5	816.9	682.8	865	615.6
201412_at	614.7	689.5	515.7	972.3	863.4	553.5	1079	979	937.9	855.5	1281	651.6	912.2	965.8	1070.6	640.1	1139.4	880.3	1195.6	793.6	1025.6	1266.3	769.4	1345.5	1228.5	1210.8	1016.5	1055.8	1644.8	1661.8	812.1
201441_at	3279.7	3946.2	3137.2	3173.3	3099.2	3402.6	2284	3018.9	2447.9	2726.6	2315.2	3678.4	2435.5	2478.1	2097.2	3151.8	2228.8	3355.4	2877.7	3221.9	2527	3030.6	2685	1902.4	2451.9	2516.1	1251.3	2146.9	1595.7	1536.4	2970.1
201447_at	562.4	546.4	541.1	465.9	446	352	575.7	470.9	628	562.1	425.6	333.1	634.5	578.5	479.1	490.4	559.5	469.7	490.9	464.9	494.6	654.5	682.7	675	362.6	252.9	394.6	605.4	372.6	394.5	343.4
201461_s_at	52.5	30.7	79.3	45.1	77.4	72.3	119.5	73.2	20.7	68.5	256	68.6	47.2	66.9	69.4	69.7	63.4	61.1	110.4	90	134	59.8	95.7	110.8	138.2	114.9	104.7	83.8	79.9	96.1	61.9
201475_x_at	1691.9	1542	1775.1	2081.2	1810	1675	2034.7	1812.3	1133.7	1518.8	1297	1613.4	1241.9	1412.2	1078.1	2040.8	1174.3	1817.3	1542.3	1354.7	1236.5	1166.2	1283.5	1294.4	1297.1	2179.9	737.8	1164.9	1121.9	1124.3	1151.8
201484_at	730	542	586.5	622	638.6	735.2	721.5	688.5	674.4	454.6	369.8	642.7	774.6	549.5	651.7	777.5	578.6	639.2	545.8	646	489.5	514.4	462	513.1	639.2	574.1	571.2	582.7	450.9	381.2	433.2
201507_at	759.9	905.6	571.6	948.1	791.1	957.6	790	585.6	843.5	716.9	780	914.8	1098.3	944.8	775.3	594.3	679.5	921.9	958.2	844.3	659.2	589.5	1019.3	662.6	692.8	689.6	650.9	675.8	640	560	772.1
201510_at	64.2	38.3	6.7	64.8	52.7	42.1	37	13.9	21	83.2	13.9	19.7	77.6	81.1	78	94.2	100	105.9	15.1	31.4	111.2	41.6	76.9	41	166.6	88.7	227.4	190.6	144.6	84.5	83.6
201526_at	882.2	1311.1	1543.4	819.6	1040.7	1428.6	808.4	766.9	1000.2	797.9	1473.2	1347.7	1203.8	923.2	807.9	1064.4	1092.8	1365	1132.2	1121.7	793.8	875.4	805.5	534.1	308	678.2	845.3	511.6	731.3	605.3	1048.4
201568_at	5302.8	4178.2	4117.5	3412.3	3616.7	6162.5	3028.6	3608.1	3643.2	3384.2	2702.6	4540.2	3904.8	3471.8	3643.4	4140.5	2358.9	4011.7	2590.8	3215.8	3271.1	4294.2	2488.4	3154.4	3027	3067.5	1122.9	3147.2	2486.1	2447.2	4566.9
201595_s_at	2014.6	1357.7	1645	1181.6	1310.4	1451.2	995.5	1386.6	956.6	1109.7	477.1	1539.2	1258.4	1133.3	901.2	1409.3	788.5	802.7	797.8	1019.7	1115	1080.5	1195.5	985.2	1160.2	1108.3	284.3	723.7	760.8	686.6	1173.1
201642_at	1994.5	1398.2	1358.7	1849.2	1568.1	1375.4	1423.7	1914.9	1583.8	1405.9	1555.8	1814.7	1567.4	1487.7	1520.1	1411	1636.5	1331.2	1341.1	1393.3	1733.2	1176.5	1307.5	1311.3	1370.4	1190	1175.7	1417.6	1170.9	1398.4	1316
201645_at	159.1	169.9	40.9	355.9	233.5	186.2	204	496	719.7	290.5	280.4	314.7	491.3	189.2	842	138.8	389.8	963.3	349.3	123.5	590.5	1598.6	268.7	670.8	393.1	272.3	476.4	297.7	1183	400.8	504.2
201681_s_at	326.3	406.3	475.9	543.8	393.1	255	628.7	471.7	633	630.7	839.3	355.6	375.4	427.3	396	423.3	759	450	806.4	490.5	597.8	610	918.6	877.7	773.3	886.8	865.9	469.5	818.8	697.8	511.7
201691_s_at	245.6	140.2	253.6	153.2	219.8	328	198.8	195.8	263.2	287.3	284.2	282.7	243	261.5	310.3	174.6	275.9	255.7	202.3	349.5	187.1	346	316.2	416.1	216	317.3	499.6	365.1	331.5	350.4	456
201693_s_at	336.5	366.1	294.5	390	556.7	405.3	420.7	380.8	538.3	385.7	770.3	342.1	261.8	294.3	368.6	332.5	475.3	848.3	272.4	411.9	346.3	262.7	399.4	543.3	485.1	431.7	666.7	545.3	461.2	432.9	1210.2
201700_at	964.8	1389.3	1407.1	1421.9	1485.4	1418.2	1294	1018.8	1270.2	991.1	1404.1	1530.2	1004.5	1179	1425.8	1131.9	1283.1	1127.2	1727.6	1806.7	1330.8	986.8	1208	981.2	1875.5	2105.9	1586	1580.7	1598.7	1552.1	1215
201713_s_at	941	792.2	1213.3	1309.1	898.5	834.1	1025	773.1	666.7	941.8	168	826.6	756.4	890	728	700	558.8	644.5	1011.4	1037.4	834.5	757.8	863.5	958.8	483.8	1326.8	287.1	627.5	734.4	460.6	705.4
201734_at	3439	4607.4	3495.9	3140	3237.7	3503.9	3506.1	3302.9	3516.3	3585.3	2013.1	3708.6	3645.8	3905.3	3343.6	3256.7	3032	3706	4040.7	3254.4	3467.9	3456.6	3380.1	2542.9	3044.7	2920.2	1581.2	3775.4	3139.7	3257.7	3049.4
201753_s_at	3914.9	4381.9	3467.4	4603.6	4943	3256.7	5995	5547.1	8491.9	7380.1	6379.4	3814.5	6133.6	5764.2	7828.9	4194.2	8467.5	5568.4	9679.3	5529.7	9288.4	11930.3	7897.3	8316.2	6926.7	7163.9	6591.5	6743.8	8734.9	10420.6	4080
201774_s_at	115.7	129.3	199.8	155.2	131.6	112.7	230.2	196.3	52.9	133.3	63	71.8	88.7	248	251.1	210.3	193.4	170	186.7	146.6	127.8	148.9	232.9	222.8	407.2	160.5	212.6	204.1	240.1	202.5	191.4
201813_s_at	658.2	835.7	754.4	772.2	828.1	767.2	1062.9	800.6	794.7	827.3	894.3	865.5	1130.1	742.2	930.8	836.3	1017.8	853.2	1286.7	923.3	576.4	873.3	1071.5	800.4	1326.7	573.8	1342.9	1199.6	1101.3	1012.4	878.7
201837_s_at	895.2	656.5	819	721.2	918.4	855.1	624.7	769.7	700.8	780.5	543.4	844.5	839.6	656.9	564.5	560.1	671.8	743.7	702	688.5	609	662.1	748.5	435.4	458.3	669.1	484.3	446	446.8	732.7	574.5
201846_s_at	775.7	603.7	422	747.5	988.9	876.4	1362.9	808.1	475.6	1001.1	505.1	674	735.5	943.4	725.9	1006.1	874.5	867.2	872.4	705	781.3	613.2	1024.2	1215.5	1337.2	927.1	1338.4	1017.7	920.8	856.9	909.4
201862_s_at	268.5	291.3	279.8	533.9	227	236.5	432.4	455.6	296.1	264.4	382	343	407.8	319.8	440.2	251.8	437.7	271.4	560.4	250	418	376.1	438.1	529.7	402.4	342.6	349	464	461.8	365.1	404.5
201863_at	865.2	885.2	835.6	816.2	957.6	984.6	922.4	975.4	949	1012.1	1095.3	969.4	811.2	753.4	906.5	1135.2	925.9	981.4	863	977.2	741.2	840.9	677	621.6	1045.4	780.4	799.6	881.8	787.2	794.6	788.8
201869_s_at	26.7	21.4	27.2	32.4	31.8	27.5	29.8	12.7	84.3	27.9	53.1	29.2	37	30	57.7	47.4	47.2	34.5	59.1	100.8	35.3	131.7	35.3	21.1	48.8	164.6	42.5	66.3	53.7	41.5	14.7
201873_s_at	682	452.4	476.2	509.6	490.1	675.1	387.1	484.8	487.2	548.5	727	631.9	697.3	580	541.7	607.8	564.6	491.6	347.1	515	584.2	655.4	506	580.8	380.8	274.6	376.3	416.5	395.2	360.2	975.7
201905_s_at	20.6	34.1	19.1	35.3	25	22.2	42.3	28.6	37.6	19.2	16.5	22.2	23.1	60.4	17.1	40.3	37.8	32.9	13.2	16.9	42.5	9.9	21	16.5	44.2	16.2	51.8	104.7	39	45.6	83.2
201914_s_at	153.6	220.6	237.1	229.7	204.4	212.5	223.5	251.2	262.3	136.6	324	248.5	267	226.5	311.7	190.5	273.3	161.5	260.5	268.9	317.1	342.3	318.9	263.7	483.7	212	407.2	325.2	176.8	263.4	384.5
201917_s_at	358.8	353.2	507.2	440.3	288	535.1	444.5	487.3	383.3	499.1	427.8	497	485.6	440.5	473.4	423.1	405.8	301.9	456.5	456.8	360.2	392.7	413.7	516.7	592.1	509.8	923.7	627.1	438.8	518.3	540.8
201924_at	1215.5	1846.6	1379.6	1939.5	2037.5	959.4	1907.7	1740	1977.9	1705.1	2256.2	1228.5	1364.3	1575.7	1796.4	1312.6	2060.5	1344.4	3265.4	1593.4	2346.8	2242.3	2647.9	1950.4	3205.4	3933.1	1631.9	2316	2081	3701.5	1164.8
201931_at	912.2	528.8	637.6	485.7	798.2	609	577	510.4	498.8	552.2	509.5	586.9	540.7	577	645.3	644.1	365.6	427.7	426.5	464.2	555.3	617.2	554.9	434	457.6	571.5	243.4	472.9	436.6	582.2	447.8
201958_s_at	5.5	17.8	7.8	7.8	6.9	7.3	14.2	12.1	11.3	9.8	33.1	8.9	9.7	11.4	9.9	9.2	23	11.8	24.5	8.7	12.9	8.4	12	11.5	19.1	6.2	62	21.3	23.5	43.4	19.7
201974_s_at	209.7	205.8	213.2	300.2	192.5	207.1	344.7	272.3	133.2	190.4	491.1	141.8	271.5	218.8	167.1	284.6	227.5	236.3	183.4	213.2	371.7	193.1	323	268.1	368.1	218.3	440.5	407.7	261.6	370.4	249.8
201980_s_at	406.9	343.1	419.5	624.4	424.9	458.8	413.1	565.8	400.5	397.6	255.2	415.5	433.4	466.2	413.3	378.3	328.4	358.9	237.4	265.1	401.1	506	319.3	330.1	371.7	394.6	435.2	351.8	259.3	283	319.6
201999_s_at	831.1	1070.9	834.3	1207.4	1065.3	838.2	1390	1333.9	985.8	1238	790.1	1031.2	999	1327.8	1087.2	1127.8	1589.4	1166.4	1399.5	968.7	999.8	1867.3	1179.1	1302.9	1837.6	1648.8	946	1572	1505.2	2008.9	965.3
202008_s_at	123.2	103.9	141.2	137.3	131.2	106	177	144.2	273.4	130.1	275.5	187.5	244.2	163.7	150.1	276	150.9	144.5	76.8	134.5	184.5	149.6	117.5	179.4	236.3	186.6	306.6	182.4	238.5	358.2	99.7
202018_s_at	16.2	15.4	11.5	562	32.9	35.4	71.2	87.9	27.5	23.8	59.9	83.5	1591.9	41.8	310.1	24.3	368.6	212.4	231.9	18.8	507.2	34.6	33.5	382.4	910.1	584	64.1	430.5	858.1	1052.3	1630.9
202022_at	6535.5	7457.1	10543.6	7149.9	12038.5	8500.9	7809.5	11483.2	11596.8	5072.2	18139.6	11048.7	7769.3	10650	12945.1	13149.6	6152.2	9411.9	8746.6	14245.2	12222.3	11101.4	6281.9	4785.8	4626.7	4454.6	4395.6	7139	6648.9	6811	7115.1
202033_s_at	1437.5	1070.2	2263.8	1733.6	1810.6	1713.5	2299.3	1577.2	1277.5	1315.4	595.3	1306.3	1337.6	1765.3	1237.4	1773.9	641.3	981.4	1237	1636	1329.8	1104.9	1888.3	1352.5	729.2	1238.3	710.5	955.5	1067.9	621.6	999.3
202054_s_at	756.5	850.5	608.7	1000.8	949.6	774	1044.9	964.5	864.4	945.6	537.8	731.3	795.4	831.3	573.6	836.4	1096.6	948.4	1148.3	878.9	869.7	1098	1233.4	838.7	2244.3	1328.8	265.5	1386.3	1166.8	1287.3	837.4
202076_at	1386.8	1423.6	1490.5	1236.1	1243	1057	1266.6	1393.4	1405.4	1378.6	933.7	969.5	1341.5	1472.7	1362.6	1151.3	1076.3	1002.8	1604.6	1125.4	1242.9	1459.5	1714.4	1439.7	1780.6	1876.6	1137.1	1857.7	1486.9	1860.3	1708.1
202081_at	1044.3	1129.3	1661.3	1530.1	1013.6	911.2	1115.7	1237.3	1087.8	1840.7	1634.6	861.2	742	1143	888	1045.4	1394.4	1450.6	1103.4	1574.2	863.9	991	1165.1	1744	1484.5	1148.2	1404.7	1866.3	1594.6	2045.2	2190.9
202096_s_at	499	446.8	485.1	947.9	616.9	424.4	730.5	903.4	593	749.3	527.3	388.3	634.2	752.9	903.5	387.8	749.9	556.8	920.1	351.7	704.4	612.4	816.9	679.5	1069.8	662.4	671.2	737.3	693.1	881.5	653.1
202118_s_at	98.1	219.1	212.2	294.7	316.4	282.8	385.7	306.7	203.8	214.7	272.1	303.2	416.1	214.3	459.5	341.1	391.5	224.2	424.1	395.3	396.3	497.5	375.8	486.6	456.4	380.5	329.8	317.8	353.4	256.1	322
202133_at	246.9	294.4	220.9	676.1	517.5	209	456.4	832.7	825.1	397.8	616	558.3	825.6	513.4	1106	422.6	1194.7	943.1	1032	275.4	1800.7	2826.5	1095.4	1548.2	542.1	997.2	745	1130.6	1373.7	875.9	718.2
202155_s_at	289.7	396.8	390.8	456	361.4	311.4	530.6	370.2	405.2	367.3	351.1	250.9	321.2	603.8	444.2	469.3	480.6	402.2	472.5	391.7	356.3	478.5	524.3	451.6	623.4	443.6	660.1	562.3	491	431.4	543.5
202203_s_at	1313.8	611.1	647.3	995.3	589.7	193.4	692.2	883.5	615	246.2	301.7	1057.8	1431.6	546.5	713.4	300.5	489.5	545.2	444.3	650.2	81.4	102.2	819.9	595.5	616.6	161.7	404.7	30.9	249.7	480.8	157.4
202241_at	423.2	676.7	299.3	677.8	557.5	393.3	661.6	666.1	611.3	401.5	949.8	463.3	623.8	359.9	526	559.2	349.1	496.1	600.9	440.1	624.6	360.2	490.1	336.4	434.1	356.7	212.4	494.2	424.8	397.6	446.1
202262_x_at	263.8	142.7	315.8	362.4	424.8	392.1	601.9	502.7	177.3	399.7	621.3	464.3	388.5	430.8	490	291.9	1044.2	805.3	912.4	422.5	596.6	889.1	355.7	701.8	776.6	610.3	720.9	578.8	1035.2	1330	407.2
202275_at	149.2	279.7	270.4	269.1	235.9	218	234.6	152.5	283.5	341.6	378.4	222.6	225.6	313.1	234.1	304.1	412.4	364.1	509.9	407.7	252.2	313.2	251.6	332.6	334.5	284.2	589.3	121.7	322.4	338.7	173.1
202293_at	172.9	194.4	274.5	188	156.7	133.5	196.3	220.1	195.7	270.3	69.3	72.7	187.8	241.5	256.3	194.8	178.7	189.3	257.1	92.2	251.3	300.3	187.9	313.7	283.8	254	310.2	268.9	266.3	236.5	197.8
202309_at	1333.2	1058.1	673.6	767.6	883	1179	742.2	825.9	738.3	628.6	932.3	1253.2	955.5	665.7	973.7	664.9	783.6	866.9	643.9	701.2	726.8	800.6	687.9	562.6	610.2	472.9	408.3	448.5	722.7	556.7	655.7
202334_s_at	2278.7	2381	1862	1003.5	1856.5	2293	1998.7	1335.3	1092.1	1796.4	1370.8	1834.5	1505.8	1137.7	1203.9	1188.2	1393	1112.2	1075.9	1293.7	1553	1435.1	1909.3	1071.1	1337.6	1689.1	964.1	1523.8	1398.2	1829.4	1457.9
202349_at	579.6	592.2	501.2	512.7	504.5	565.3	455	503.5	514.1	409	270.8	680.5	605.2	470.1	234.2	482.7	368.4	328.4	226.4	598.6	434.2	521	497.8	477.1	830.7	216	96.8	330.1	463.7	422.1	472.6
202350_s_at	366.7	225	240.1	576.3	257.6	371.4	350.1	400.5	602.5	410.2	434.6	352.2	638.7	606.9	752.4	360.2	650.4	572.8	421.9	253.6	404.5	1557.9	444.9	548	703.4	841.3	243.5	539.7	801.9	679.2	629.6
202365_at	467.3	692.6	766.6	1658.1	742.5	825.8	805.4	981.2	1132	1689.6	732.3	806.1	1270.6	886.4	1036	856.3	2360	1362	1456.2	1280.4	1653	955.3	861.8	1381.7	1260.1	1751.2	909.9	996.5	2401.4	1363.9	1041.4
202398_at	108.2	75.6	47.4	112.2	76.8	53.7	16.1	118.3	21.6	138.1	18.1	84.1	68.4	158.8	75.7	25.9	35.9	101	134.2	108.5	10.3	96	203.8	13.8	204	124.4	223.1	32.9	119.8	135.7	98.5
202401_s_at	252.7	249.9	255.2	174.2	236.4	222.7	180.2	310.7	317.8	176.1	339.9	288.2	263	209.3	203.2	209.1	267.4	283.2	342.7	221.6	156.1	171	232.4	151.8	26.2	146.3	134.7	141.1	179.7	121.6	248.1
202410_x_at	17.7	21.1	11.1	11.8	9.7	9.9	14.4	12.2	29	18.9	57.2	10	13.9	13.2	14.2	39.8	19.7	20.2	17.1	8.6	19.3	9.5	23.3	71.9	21.2	18.4	50.2	17.6	16.7	27	18.6
202411_at	354.6	158.9	733.5	302	786.8	527.6	315.2	754.7	486.6	348.3	292.9	305.3	365.1	630.6	692.4	488.1	110	599.5	265.4	436.9	293.7	690.5	342.2	814.7	305	283.6	178	313.8	187.9	280.1	343.3
202418_at	478.3	470.7	437.9	556	458.5	453.7	455.4	558.6	532.4	653.1	625.5	606.4	596.6	655.8	739.9	480.6	624.6	612.5	499.2	445	456.4	818.2	602.6	441.1	611.6	512	586.5	473.9	591.3	761.3	613
202439_s_at	926.7	1941.9	810.8	1055.1	1314.5	1080.7	1031.8	910.5	861.1	801.7	992.1	1732.2	1405.5	528.3	686.8	779.6	772.6	1265.4	726.3	1073.4	1182	739	719.5	549.5	872.4	595.2	593.8	1155	682.6	674.3	780.8
202442_at	5930.4	5586.2	3968.7	4722.9	5567.3	4955.4	4572.4	4203.7	4171.3	4061	4522.4	4405.3	4074	3945.2	4152.4	5746.3	3830	4821.1	3946.6	4297.7	3585.9	3084.7	4031.7	3826	4103.1	3236.5	3403.4	4638.8	3134.1	3781.4	2978.4
202445_s_at	135.5	178.6	115.6	104.3	186.6	145.1	157.2	136	166.8	181.3	115.5	115	177.9	126.9	215.5	194.7	238.6	220.1	133.3	205.1	271.6	172.1	243.4	233.4	478.5	183.8	301.2	283.3	193.6	275.4	169.1
202457_s_at	9087.2	15544.3	6914.8	8497.9	11161.5	8896.7	5216.6	7331.3	7482.4	5326.8	5476.2	10808	8326.5	5407	5669.9	5574	4348.9	6401.1	5081.6	7632.6	5934.5	5216.2	6079.4	3198.8	4305.4	5582.2	2116.6	8136.5	2777.7	2323.8	5444.8
202494_at	195.4	191.1	100.7	174.5	211	215.3	256.3	274.4	236.1	507.7	403.6	126.6	163.7	155.8	313.1	299.4	153.4	265.4	233.6	298.2	284.8	249.8	276.5	334	339.8	205.1	546.3	430.9	363.9	350.5	286
202496_at	250.3	324	333.4	297.3	282.5	221.8	320.2	288.1	282.6	394.8	512.8	212.7	293.8	247.8	243.5	243.3	306.9	488.1	484.4	437.4	294.7	256.5	313	261.5	350.4	349.9	402.6	293.3	322.5	363	406.8
202532_s_at	214.9	364.4	157.1	452.4	315.6	214.1	279.6	353.6	208	217.7	472.3	174.8	344.1	348.7	349.9	172.3	403.8	219.8	397.5	235.4	490.9	286.6	483.2	560.3	362.7	345	508.8	487.6	317.3	331.7	411.2
202534_x_at	636.9	535.4	495.7	627.8	519	455.2	468.6	526.9	648.9	535.1	1091.1	313.1	609.3	830.6	643.1	484.7	627.8	528.3	546.6	570	819.5	740.6	957.4	1070.6	1019.1	585.4	851.5	1035.9	774.5	683.5	722
202540_s_at	1316.3	1377.6	1429.1	1056.8	996.6	1012.6	1009.8	725.6	851.5	1189	419.8	1130.1	644	761.1	751.2	834.3	1165.6	1336.4	683.4	1073	1197.3	1050.4	889.7	1063	893.7	617.4	562.4	753.6	645.5	629.7	845.6
202551_s_at	455.6	856.5	969.4	777.6	542.4	690.7	781.1	695.4	542.8	583.8	392.7	783.6	725.9	637.1	655.5	835.1	548.5	522	437.7	887.5	677.4	495.6	711.1	918.7	315.1	530.8	302.8	677.3	654.4	517.9	459.4
202570_s_at	237.1	308.3	177.5	232.6	196.8	220.9	196.8	202.1	280.5	210.4	426.3	273.8	168.8	138.6	148.6	189.5	242.3	241.2	367.4	185.8	72.7	101.9	227.9	307	106.9	179.1	176.3	271.2	98.6	189.7	10.9
202579_x_at	1149.7	637.4	965.6	878.1	1220.7	1079.2	1164.8	1149.7	1017.8	1079	814.4	1086.2	1242.8	791.2	1180	1169.7	941	1022.6	823.5	1026.2	924	1076.2	829	840.7	733.9	815.7	600.9	806.5	760.4	730.9	1098.1
202582_s_at	2735.3	3265.3	3460.6	2375.6	3053.5	3045.2	1799.1	2380.1	2567.4	3340.9	1322.5	2865.7	2997.1	2073.7	1998.8	2822.6	2557.1	2576.5	2896.6	2934.3	3618.7	2955.4	2816.6	2375	2021.4	1975.2	757.6	3296.4	1936.9	1497.7	2282.6
202583_s_at	639.7	340.7	1106.4	539	647.4	673.4	632.5	734.1	512.3	453.5	322.4	587.3	521.8	621.9	580.2	626.6	314.7	488.6	382.3	659.8	448.9	697	478.2	564.5	446.3	623.9	230.6	423.8	346.9	357.9	513
202596_at	2474.2	2103	2762.8	1631.5	1558.5	2913.5	878.9	1310.9	1390.2	1368.6	1989.8	2869	2019.4	2025.9	1782.7	1451.1	1380.6	2137.8	1289.4	2289.7	1268.1	2102.5	1384.4	1480.3	974.4	476.7	677.6	1089.3	976	731.4	3322.2
202614_at	1478.2	1124.8	2007.6	991.6	824.3	1809.4	899	1132.4	893.5	655.8	768.6	1504.5	1456.1	1199.7	1604.5	914.7	606.1	1055.7	850.4	1274.1	1388.4	2024.4	977	993.9	606.9	855	537.7	727.1	832.6	416.5	2134.6
202637_s_at	474.5	306	348.7	482.8	339.7	299.2	368.7	782.1	127.6	441.9	648.1	451.1	534.5	370.9	404.7	360.3	566.5	460	487.1	464.7	506.3	382.9	351.1	888.1	534.1	444.5	825.3	520.9	565.4	760.8	510.3
202656_s_at	324.2	404.9	401.1	556.9	425	307.9	507.2	450	446.1	600.5	509.5	394.7	417.7	503.5	554.2	362	571.9	419	728.9	557.7	646.3	481.5	675.1	690.1	801.6	622.3	804.3	558.4	652.8	781.1	467.4
202668_at	1766.1	2452	2010.2	1712.9	1923.9	2129.4	1196.3	1505.6	2067.5	1358	1487.1	1878.7	1683.7	1204	1317.3	1681.7	1267.5	1444.2	1445.4	1616.6	1181.6	1003.9	1433.7	1241.3	1137.9	1350.9	997.6	1677.3	1127	1329.5	890
202683_s_at	983.9	955.4	1055.9	1035.6	1020.8	1368.7	847.4	653.8	1152.6	1013.6	1388.4	1080.2	1232.4	822.7	834.9	1136.3	915.8	1162.8	820	1055.6	1050.5	784.7	994.7	1038.1	663.8	748.7	820.1	918.9	891	645.8	938.7
202684_s_at	37.7	13.5	26.3	3.6	28.1	24	42.6	20.4	53.9	62.7	62.9	59.6	55	45.2	105.8	71.5	6.4	33.3	6.9	6	56.1	63.4	19.8	79.4	97.2	4.6	133.8	35.4	58	69.2	63.7
202698_x_at	9645.7	8558	8397.2	9118.9	9383.6	11331.6	9849.4	9832	7046.1	9761.1	7525.2	8451	7902.9	8570.4	7657.4	11821.6	6362.5	10841.5	6660.2	9341.9	6815.8	6947.5	7515.7	6291.4	6595.3	7178.6	4752.7	7137.6	5658.3	7184.8	8049.4
202702_at	428.8	431.3	349.4	610.3	550.8	383.1	842.6	434.4	387	560.6	553.7	443.9	530.4	524.3	471.7	506.6	501.4	619.9	384.8	465.3	509.2	411.2	388	467.1	583.3	800.5	514.8	528.8	767.6	816.4	571
202724_s_at	328.2	410.3	468.1	541.4	434.7	297	465.1	483.3	755.7	638	619.8	322.1	606	519	523.8	372	645	500.7	839.9	614.7	601.3	493	615.9	796.3	854.4	600.8	801.9	636.2	843	934.6	543.4
202728_s_at	69.6	17.9	20.8	27.9	57.9	19.1	29.7	129.9	26.9	23.2	15	29.1	20.4	28.1	25.3	17.7	23	20.8	73.3	41.1	20.5	71.6	36.5	159.2	67.2	33.8	34.5	44.5	44.3	39.4	40.9
202746_at	2302.8	865.3	1818.7	3142	1516.1	2094	1800.7	1786	2096.3	1561.2	1594.8	1763.8	2771.4	2544.7	3985.4	3414.6	1014.9	3450.2	2171.5	1970.8	1970.8	4232	3072.6	3406.2	887.4	1736	494.5	867.5	1486	928.1	1533.9
202754_at	2292.2	2495.3	3115.6	1978.7	1609.6	2018.5	1935.5	1186.6	2279.7	2515.9	1104.5	1825.5	1619.4	1296	1607.5	2463.9	2315.2	1879.5	1700.7	2796.4	1821.4	1356.4	1813	1156.5	1285.3	744.2	1905.4	1317	1172.6	987.6	1308.2
202782_s_at	505.1	503.6	561.5	670.9	471.5	662.8	625.1	557.5	557.4	471	1233.3	528	484.4	594.7	721.1	607.5	564.9	553.1	478.3	752.8	445	511.7	631.7	666	738.1	654.2	1034.9	696.2	759	823	651.9
202857_at	1380.5	1365.1	1018.7	1096.8	1009.4	1106.8	1022.7	1127.5	664.8	988.1	881.5	977.9	1180	1689.6	1030.6	979.8	924.3	1020.7	1044.6	792.8	754.2	1091.5	1059.4	1001.8	946	836.8	464.7	738.1	897.6	531.1	1126.3
202880_s_at	502.4	486.8	631.6	649	460.9	379.1	535.7	492.4	643.1	808.3	744.1	519.4	431	1208.2	890.9	506.3	892.7	609.8	627.5	880.7	403.9	709.2	1315	957	745.9	475.9	1563.8	252.6	1039.5	1255.9	957.2
202903_at	71.2	83.1	74.6	135.8	89.6	163.6	122.3	106.6	132.8	118.5	233.5	118.4	185.7	133.8	240.3	142.4	200	157.3	163.8	170.7	150.6	173.3	163.5	120.5	205.9	69.5	325.3	192.8	177.2	127.8	207
202923_s_at	634.7	637.3	683.4	790.9	768.6	691.6	893.5	765.3	626.9	756.8	586.3	655.9	913.8	1171.7	799.2	518.3	635.2	667.6	563.1	555.5	833.3	1126.7	823.7	1083	898.5	781.1	960.5	660.5	1084.8	915.4	926
202933_s_at	385.4	552.4	564.4	775.1	645	393.4	602.5	651.3	911.2	899.4	845.6	461.9	759.5	760.7	1184.6	1020.3	706.6	568.3	1196.4	600.6	999.4	1195.8	1054.7	1604.2	1062.8	761.5	911	1044	1194.9	934.5	682.3
202941_at	1624.4	1251.2	1590.6	1037.2	1315.2	2001.9	1021.9	991.5	1035.4	949.1	973	1464	1385	1387.1	1039.5	1568.1	715.9	1092.1	929.8	1109.6	922.5	1276.9	870.8	843.1	793.6	938.6	436.2	847.7	687.7	816	1613
202945_at	465.1	477.2	204.1	446.7	255.7	417.8	291	379.7	457.8	394.8	470.4	350.2	386.5	400.5	365.2	314.6	480.9	451.8	442.6	390.5	495.8	437.3	286.2	443.1	505.7	226.9	629.3	621.1	364.3	579.3	589.1
202950_at	1184.1	387.4	641.1	475.4	830.4	671.7	422.7	437.5	434.9	391.6	285.8	857.7	445.4	468.9	456.3	609.9	452.7	124.1	424.9	431.3	521	567	386.3	285.6	236.4	1095.7	189.9	446.4	228.5	259.9	246.1
202962_at	592	535.3	527.7	777.9	651	680.2	1061.8	864.1	890.1	888.4	1131.1	506	725.9	1571.6	875.6	567.7	1035.6	834.5	948	619.4	668.6	697.4	1314	928.2	1675.9	516.9	1455	973.2	1136.1	1151.7	981.1
202977_s_at	16.7	6.2	17.1	17.7	11	13.6	11.6	9.1	9.6	22.8	23.7	6.1	12.9	11.4	16.5	16	18	15.4	19.8	12.4	17.5	13.6	17.6	13.5	14.9	21.9	22.6	17.1	26.5	27.5	17.6
202986_at	3161.5	5083.3	3164.2	3067	2650.2	3717	2587.5	2407.5	2925.6	1578	2278.4	5310	2937.6	2084.8	3118.8	2044	1920.1	2971.7	3263.3	2484	3467	2838.5	2762	1959.2	2286.1	1803.6	1757.4	2297.4	1925	1686.9	1984.1
202991_at	47.4	117.3	228.4	174.8	245.5	220.4	238.9	150.3	184.9	94.4	551.6	255	226	175.5	190.5	221.3	297.6	253.8	413.6	263.9	245.8	137.8	177	135.7	147.8	262.2	314.3	77.9	352.3	258.9	273
203008_x_at	1468.3	614	647.1	577.6	530	1183.4	547.3	833.5	462.8	452.1	136.1	657.4	930.8	791.5	719.8	558.7	346.9	618.2	309.3	526.1	498.7	887	513.8	477.5	427	393.4	207.2	625.4	431.1	224	1068.9
203010_at	170.5	223.5	243.6	255.7	273.5	124.3	438.1	236.2	322.5	271.1	265	219.5	327.6	301.2	365.7	379.8	516.7	163.2	372.4	219	391.4	412.9	271.7	241.6	404.8	382.3	702.5	401.4	482.4	407.7	305.9
203012_x_at	15244.1	20355.2	12932.7	19868.3	18654.8	12804.5	19931	19462.3	19344.8	18733.1	17969.8	18043.9	17273.6	19979.3	20553.9	15222	14497.6	19714.3	19930.4	13291.5	15822.6	19489.4	21682.2	19846.1	18623.9	14600.2	17422.7	16122.2	13697.8	17253	17373.4
203022_at	199.7	294.3	186.8	283.3	224.2	249.3	287.8	354.1	281.6	248.9	479.6	207.8	285.1	335.8	396.7	226.1	245.6	236.6	252.3	224.1	234.6	284.8	250.6	416.5	341.8	212.8	436.9	382.9	402	368.7	349.4
203030_s_at	22.4	14.8	146	18.9	39.8	255.1	25.5	19.5	59.4	17.6	12	49.3	31.6	23	19	39.1	9.1	13	16.9	53.6	16.1	35.6	9	8.2	15.7	28.1	18.1	15.4	10.1	11.6	15.3
203051_at	170	198.2	181.6	194	194.6	157.7	192.6	144	96	73.7	100.3	214.5	184.4	141.3	196.7	178.2	220	152.4	224.3	206	202.7	179.4	165.6	230.6	112.7	246.3	344.6	150	237.6	220.2	207.9
203058_s_at	94.5	148	94.5	184	78	98	148.4	101.8	105.4	114.3	194	107	174.8	130.1	137.1	147.4	167.8	83.4	111.5	191.6	219.1	122.8	202.4	359.9	141.2	147.9	170.4	211.3	141.8	107.2	107.3
203073_at	666	614.4	871.9	788.1	606.5	654.8	832	653	641.8	1001	907.6	539.3	728.9	938.4	614.3	733.4	648.8	545.3	728.8	783.6	951.8	795.8	738.5	1015	1075.8	763.5	828.7	1019	844.7	819.9	831.1
203087_s_at	1107	642.9	847.9	566.8	799.6	766.5	604.3	787.4	668.4	533	422.5	838	691.3	962	846.3	595.4	570.1	596.5	550	545.8	590.2	872.5	726	618	648.1	844.5	378	428.1	478.8	423	565.6
203093_s_at	227	169.2	224.5	437.9	201.3	222.8	247.9	236.2	242.2	204.4	364.4	216.5	221.2	254.3	224.6	140.4	177.5	266.5	316.6	315	276.5	289.5	326.5	236	256.5	462.7	285.9	225.1	316.2	643.6	303.1
203101_s_at	6.9	7.2	7.2	5	7.4	6.7	6.1	9.3	6.6	7.8	14.1	6.4	10.2	7.2	9.6	19.6	10.3	6.5	10.8	9.1	9	7.5	10	10.2	15.5	4.4	14.4	23.2	7.7	9.2	11
203103_s_at	1170	1283.1	1976.6	1362.8	1411.7	1849.9	1235.7	874.5	1299.9	1058.6	1226.2	1569.7	947.5	752.1	1104.7	1615.7	1580.8	1291.8	1218.7	1037.7	943.2	1117.8	1190.3	726.1	601.2	710.6	730.4	962	930.4	918.7	1300.3
203127_s_at	367.6	432.9	266.3	592.6	479.3	278.2	551	553.2	512.6	457.8	235.2	401.6	399	622.4	476.4	336.7	712.4	501.5	366.1	333.2	339.4	374.5	550.2	382.4	946.5	447.1	668.2	427.3	656.6	902.4	639.9
203144_s_at	89.6	19.7	71.7	119.3	58.3	95.6	84.3	238.8	58.7	60.9	143.4	34.7	45	39.5	135.7	115.2	133.7	87	169.6	43.7	54.5	112.9	261.2	120	242.2	150.9	159.5	95.7	180.2	110.7	186.4
203146_s_at	3426.7	3113.5	5038.2	3293.7	5432.1	6711.7	3615.4	4151.5	4808.7	2617.5	6349.9	7140.6	5506.8	4403.9	4974.3	4659.2	3641.5	6415.7	4420.6	5352.6	5292.5	3804.6	2449	2607	1737	3247.4	2208.5	2902.2	3096.2	2604	3081.1
203151_at	8889.2	14876	10304.4	13037.8	13240.8	11787.1	10733.3	10776.6	11767.8	9372	15988.7	13008.5	10071.1	9225.9	8240.4	13981.2	15980	13684.6	12167.1	14266.7	10631.8	7141.9	9060.2	8171.2	9098.1	9796.4	9209.6	10457.6	8766.8	6652.5	7614.2
203154_s_at	78.5	230.3	133.7	201.1	140.8	124.1	116.1	127	176	130.9	202.4	151.5	148.9	237.5	516.1	318	450.7	125.2	585.4	96.3	311.9	339.7	459	220.6	241.2	294.7	340	193.3	345.9	287.3	259.3
203164_at	262.6	319	351.9	403.3	379.1	246	398	303.7	423.7	349.2	389.1	287.6	380.9	342.1	388.2	372.5	390.3	359.2	376.2	314.3	325.8	467.8	461.4	360	479	444.3	323.9	478.4	439.3	450.9	298.7
203184_at	94	77	62.7	59.1	50	115.4	173	50	77.6	99.1	107.4	90.5	89.2	103.5	93.3	115.1	114.5	75.5	59.8	120.5	80.7	69.9	109.9	133.1	137.9	91.3	250.2	141.2	151	206.1	111.1
203193_at	38.1	38.9	34.3	39	53.7	58.6	91.6	64.3	55.5	78.3	132.4	52.2	109.6	112.9	24.7	62.3	57.3	72.9	68	141.6	156	84.1	173.2	183.5	181.1	135.3	134.8	38.1	92.3	223.1	45.6
203195_s_at	109.7	120.7	81.7	27.5	113.5	114	93.7	116.8	247.6	110.5	63	171.1	154.2	170.3	131.2	280	244.8	190.7	298.8	252.2	245.7	130.1	245.6	270.8	215.6	160.7	239.9	278.3	242.9	352.9	139.1
203206_at	760.5	647.7	744.4	1151.5	782.2	662.9	770.5	832.6	1305.3	1145.7	1433.9	457.7	466	925.2	688.1	901.9	1618.5	914.2	1165	896.3	914.6	726.7	1091.5	902	1006.7	1239.4	2503.9	795.6	1039	1443.9	824
203235_at	376.5	129.2	175.8	187.5	164.9	184.6	174.1	177.6	164.8	318.7	365.3	164.9	139.8	98.7	181.7	201.8	231	243.1	308.3	259.3	170.7	83.7	213.6	164.3	251.3	184.3	516	280	232.4	343	235.7
203236_s_at	226.2	211.5	155.1	305.3	233.8	209.8	295	231.7	267.9	232.1	330.5	191.2	190.6	267.5	353.1	252.6	506.6	284.8	298	281.5	209	167.8	149.6	252.1	315.4	312.1	564.6	359.5	455.8	329.6	221.8
203262_s_at	664.4	622.8	755.9	1356.7	790.7	621	1141.4	1085.3	904.2	1154.1	1206	666.2	741.6	1170	684.2	878.2	1196.4	1068.6	1081.1	962.6	863.1	722.3	960.2	1039	1282.1	1089.3	1683	918.4	1217.6	1604.7	955.6
203274_at	2333.3	2183.1	1766.3	1330.3	1342.9	1658.3	1251.4	1150.9	1104.3	2014.1	886.7	1477.9	1328.9	1271.1	825.3	1515.7	1075.1	1340.3	1168.1	1500.5	936.4	900.9	1205.4	1077.5	1681.2	634.6	889.6	2693.4	829.5	958.1	1089.1
203290_at	19.1	11.5	281.3	595.6	8.5	21.9	15.8	20.1	236.6	7.4	263.9	167.5	526.9	14	582.7	29.2	250.2	18.6	188.3	6.6	136.6	576.8	19.7	323.8	111.6	187.9	53.3	38.3	34.1	75.9	31.8
203306_s_at	1059.5	1336.1	1193.7	1063.4	1042	1213.3	705.6	844.7	1327.5	1070.3	853.3	1109.4	1206.5	677.6	1345.3	746.2	1333.8	1064.9	786.4	1202	1248.5	1336.3	1239	757.1	830.6	672.1	517.7	862.9	1017.5	794.7	845.8
203340_s_at	932.8	733.1	1440.1	456.5	687.2	870.2	629.8	514.1	484	648.2	377.8	609.8	613	421	407.7	777.4	353.6	553.7	284.6	486.2	393.5	407.6	410.2	584.7	387.6	257.9	249	452.2	252.3	254.4	494.5
203354_s_at	518.7	1279.4	850.1	564.1	562.9	669.6	431.4	644.5	514.7	510.7	379.5	1309.7	891.2	232.7	594.9	451.1	337.7	682.2	437	769.3	584	579	257.9	411.1	428	182.1	336.2	904.9	204.8	256.1	408.8
203392_s_at	2779	3011.3	3189.7	3134.1	2593.8	4389.4	2825.8	2789.9	3127.8	1594.3	2242	3771.1	2735.2	3889.1	3094.3	4258.8	2903.3	3079.1	2888.1	3403.5	2478.1	3180.7	2561.5	1938.2	1505.9	3227.2	1763.8	1947	2299.9	2937.5	2404
203402_at	1327.7	1593.6	1607.3	1421.6	2029.4	2270.2	1347.6	1984.2	1738.1	1157.5	2959.4	2061.2	1726	1040.3	1095.6	1995.5	1743.7	2609.5	2219.4	2084.9	1896.1	1075.1	1596	1122.1	727.6	1211.8	938.4	1151.7	1172.4	1093.9	1131.8
203404_at	946.3	691.5	1487	897.4	766.3	904	872.1	739.1	778.4	1019.3	361.1	869.5	882.9	694.5	677.3	1117.1	759	756.9	568.8	831.8	678.3	944	698.7	614.5	715	1116.6	277.4	679.8	537.2	642.7	682.6
203406_at	882.2	829.2	845.3	810	903.6	1014.3	877.4	856.7	1150.5	774.4	943.4	932.9	968.5	959.8	1171.2	943.3	840.5	1025.1	1065.1	1069.2	1179.6	1154.2	1122.5	1053	1254.4	1278.5	1131.9	1021.8	1128.6	1138.4	823.3
203461_at	86.6	168.6	151.8	118.4	119.2	24.5	196.2	148.4	155.4	205.9	202.9	20	219.1	101.5	217.3	282.3	258.4	168.1	119.2	167.3	231.7	172.2	102.1	255.9	375.3	271.1	511.3	423.5	298.7	332.3	251.4
203462_x_at	1183.7	1447.7	1114.3	1722.5	1115.7	1210.4	1142.9	1097.3	1361.8	1150.6	1227.3	1356.9	923.4	1437.7	930.9	1434.3	1975.6	1256	1580.1	1295.1	1317.1	1111.4	1385.4	1530.7	1447.8	1432.7	1668.4	1464.4	1896.9	1346.3	1387.6
203472_s_at	10	6.2	8	9.3	9.7	12.7	12.7	8.5	20.2	8	17.5	9.3	19.3	8.6	23.2	10	11.2	7.7	9.2	7.9	7.1	21.7	14.2	11.8	13	49.2	14	9.4	13.1	16	30.2
203475_at	73.3	80	60.1	81.8	76.8	135.1	242.5	75.2	24.8	36	363.1	53.9	154.8	104.1	91.6	148.3	49.8	134.8	56.7	26.4	86.2	21.8	175.5	35.1	192.9	81.7	402	161.3	187.7	188.6	154.5
203485_at	9914.7	17502.4	11515.2	8139.9	8956.6	8955.1	4784.2	7430.7	9692.7	8150.7	7227.2	12897.7	8702.1	7155.5	8364.3	10215.4	8927.7	9306.1	7941.5	12820.6	11557.7	8058.2	8516.1	5430.7	5852.1	8645.9	6463.3	7648.9	5905.6	5059	8504.7
203499_at	78.7	56.6	63.2	138	44.4	17.1	31.7	217.2	199.4	92.2	209.4	21.4	135.1	85.6	105.8	127.3	154.9	70.4	165.6	116.3	132.8	115.5	91.2	103	222	95.6	252.6	181.4	122.5	181.6	151.5
203507_at	77.5	97.1	107.3	140.3	60.8	72.2	131.9	117.5	77.8	181.1	45	78	90	87.7	206.7	27.8	86.9	136.2	142.2	74.1	157.7	122.4	188.5	176.6	194.2	165.4	212.9	170.6	131.3	253.9	132.7
203510_at	1699.2	1697.7	316.2	581.5	669.4	706.9	323.4	216.7	371.7	303.7	71	1630.3	718.7	721.5	376	742.1	98.9	373.8	305.8	443.5	272.3	136.5	396.1	173	605	100.7	296.4	235.6	290.9	35.4	117.7
203542_s_at	281.2	433.3	384.3	715	427.5	479.6	431.1	684.1	599.2	428.2	441	450.4	604.2	203.7	616.6	648.8	682.9	372.8	658.9	544.4	739.3	449.8	720.8	716.9	683.3	480.2	1410.4	800.9	1035.2	952.8	636.1
203545_at	714.7	686.3	650.6	754.1	709.7	677.9	789.3	664.6	665.5	711.5	589.4	652	671.8	1005.7	592.5	597.3	487.3	541.6	602.6	546.5	460.7	526.6	456.5	895.2	598.8	518.4	635.2	522.1	575.6	603.8	528
203575_at	382.3	374.4	395.5	315.9	371.5	385.8	493	369	366.2	424.5	398.5	354.2	336.8	373.3	423.7	410.1	476.4	391.6	661.7	564.3	373.8	357.5	423.1	420.9	414.7	540.5	450.5	468.2	437.3	474.1	274.6
203600_s_at	764.7	908.3	957	1181.5	856.1	899.1	877.2	936.3	740.8	1099.4	1152.1	916.9	934.9	1106.6	798.3	747.5	1225.9	806.7	1118.3	1179.7	691.1	781.1	821.7	889.4	998.4	1032.4	1169.1	1006.3	1260.2	1340.6	695.7
203619_s_at	1870.3	2816.8	3263.5	2917.9	2500.9	2740.4	3400.2	2688.1	1510.5	2225.3	1400.4	3499.5	2622.4	3287.1	1640.3	2599.2	2078.6	2751.6	2027	2687.4	2178.7	1288.9	2208.2	1898.6	1887.5	1939.2	1479.1	1921.5	1971.3	1183.7	2266
203628_at	112.9	745	192.6	378.1	196.6	193.5	480	194.9	201.2	455.7	978.1	256.1	290	240.1	233.2	444.9	577.8	217.3	375.1	280.9	213	359.4	963.7	878	443.5	382.2	1348.8	551.2	565.7	321.3	218.1
203642_s_at	238.4	182.9	312.5	192	184.7	210.5	196.4	205	244.5	165.9	471.3	135	178.1	190	394.5	273.5	329.5	215.3	198.8	297.8	182.1	493.6	235.5	465.7	296.2	237.2	332.2	240.5	225.2	260.6	238.2
203643_at	96.4	58.3	272.8	75.8	229.4	262.1	190.6	126.5	319.4	327.6	478	255	453.1	414.5	343.4	267.2	359.2	316	593.9	381.1	596.1	217.2	528.3	582.3	298.7	314	544.8	402.5	621.8	445.1	312.1
203671_at	379.2	445.7	322	369	158.7	123.8	217.2	226.5	310.4	440.7	316.3	306.8	271.6	342.6	256	320.8	335.8	293.5	403.6	386.4	392.8	347.2	452.9	453.1	582.2	266.3	389.1	734.4	411.7	490.1	407.1
203680_at	2643.8	2512.3	2492.8	1358.5	1382.5	2327.5	1037.6	1617.8	1166.7	1455.7	801.3	2283.7	1590.3	960.6	1169.2	1640.1	1102.1	1377.3	1113.2	2275.7	1346.2	1049.3	1055.4	918.6	1431.3	674.2	461	1398.6	694.8	635.8	817
203685_at	656.2	1083.1	652.2	1196.4	879.3	690.5	967.2	1207.1	1599.6	1063.3	972.5	774.9	810.7	645.6	953.4	529.7	967.2	743.1	1811.9	864.8	1424.9	1029.3	1010.2	1693.7	1748.8	1236.3	1458.1	1322.5	1611.3	1706.5	542.7
203692_s_at	201.8	331.2	201.7	293.4	191.1	229.3	241.1	237.1	376.6	246.1	776.6	298.2	259.8	171.9	281.5	298.3	335.1	281.4	235.2	400.2	281.3	205.6	140	296.4	413.4	251.4	472.4	394.8	346.2	321.6	242
203700_s_at	574.2	450.6	363.6	598.3	344.8	514.2	457.8	811.4	682	580.1	1084	642.6	429.6	381.7	422.6	526.8	352.8	575	433	379.9	563.4	161.3	397.9	367.4	421.8	223.4	172	327.1	407.2	454.3	320.3
203710_at	2483.5	1841.5	2208.3	1447.4	1433.2	1772.4	756.6	1228.1	1148.5	1795.3	1205.2	2076.1	1335	920.3	1806.3	1381.3	932.2	1343.7	1686.3	1850	1325.7	866.1	1267.4	1023	1038.7	1006.5	341	1069.4	661	583.2	967.5
203715_at	82	78.5	130.5	119.5	96.8	89.4	69.1	93.7	130.7	81.4	62.8	66.9	68	97.2	129.7	133.3	44.8	107.7	66.9	157.5	86.9	78.3	123.7	90.4	71.5	72.8	14.5	66.1	62.4	73.6	93.5
203732_at	372.4	317	391.3	400.3	427.7	328.2	459.9	462.8	421.8	533.6	291.6	394.1	385.5	531.6	463.3	400.9	301.5	348	391	385.8	347.8	382.1	570.7	407	613.5	569.1	524.5	420.4	479.6	556.7	400.4
203748_x_at	277.1	168.3	171.8	311.1	245.1	93.9	171.1	495.2	213.8	307.7	96.2	109.6	258.5	169.1	85.3	306.3	268.7	152.3	306.2	193	194.7	150.6	383	155	48.2	123.8	40.4	109.7	125.7	147.9	148.1
203759_at	107.1	145	157	232.7	198	94.4	126.5	169.1	229.7	222.6	453.4	71.4	158.4	192.5	142.4	242.1	332	195	347.3	207.4	195.7	248.4	282.5	235.8	261.7	92	459.7	188.6	295.5	356.6	235.8
203762_s_at	422.2	399.9	229.2	234.8	355.1	498.7	34.6	160.6	365.4	200.3	108.3	322.9	288.5	202.3	291.4	233.4	268.6	409.9	87.1	310.9	143.6	250.2	84.5	81.1	27.7	118.5	163.6	209.6	30.3	230.4	226.4
203763_at	528.8	780.2	351.6	374.4	360.5	574.7	312.9	420	576.6	350.4	491.9	491.5	571.5	258.9	537.3	530.4	430.7	453.4	414.2	462.4	316.9	510.2	241.5	189.8	327.8	130.2	440.3	291.4	259.1	237.2	273
203768_s_at	139.1	60.3	120.5	109.6	135.1	42	227.3	223.7	97.7	174.1	204.3	136.8	197	86.8	175.4	194.7	146	201.7	165.4	186.9	163.1	147.1	195.8	72.6	301.5	213.1	186.1	205.3	144.7	310.5	169.1
203777_s_at	126.2	78.5	153.2	252.4	192.7	189.6	170.6	150.3	226	201	288.8	163.7	101.4	157.7	259.5	122.7	101.8	198.1	176.7	270.6	140.9	113.3	130.7	271.8	272.2	134.4	672.6	269.1	335.2	288.2	293.1
203784_s_at	4.8	9.9	10.7	8.3	3.5	5.3	10.1	6.8	8	8.6	6.7	16.6	4.9	5.6	6.9	6.7	7.5	2.9	6.5	7	10.8	7.5	8.1	19.2	13.7	4.6	17.1	11.8	11.1	10.8	11.3
203793_x_at	350.2	457.3	492.2	564.9	414.5	462.4	759.2	539.1	387.5	630.3	1027.9	465.5	464.1	431.9	443.8	989.6	575.8	578.6	457.7	896.8	593.3	380.7	373.2	822.7	614.8	434.1	806.4	698.6	691.7	725.2	647.7
203798_s_at	1958.4	528.8	3151.1	179.2	787.3	1814.4	375.6	572.6	312.5	533.2	226.9	1147.3	600.5	645.9	281.8	1189.9	246	640.9	294.6	1124.2	236.2	569.6	256.1	184.8	100	185.4	199.3	310.2	26.6	29.3	640
203824_at	161.8	19.1	139.4	216.4	305.9	192.2	247	204.3	155	157.5	396.9	104	231.8	447.2	235.3	207.8	307	181.1	244.4	104.1	136.9	295.4	444.9	440.2	237.9	310.9	304.8	358.9	351.3	214.9	315.4
203868_s_at	123.3	129.8	105.4	210.4	129.8	163.4	222.9	491.5	398.1	154.5	192.7	146.5	319.8	216.4	319.4	197.1	411.9	612.4	173	85.4	240.7	798.8	194.9	281.3	279.3	324.5	413.7	264.7	466.2	312	442.1
203870_at	3008.3	3170.8	1562.5	1805.5	2617.8	1892.3	2281	1557.4	1561.4	2300.9	1141.3	1904.3	1781.2	1616.8	1566.1	1531.2	1522.5	1894	1419	1848.8	2136.6	1443.4	1626.7	2154.9	1393.1	1797	704.5	1457.5	1768.9	1585.1	912
203876_s_at	47.9	60.6	129.4	53.6	18.7	43.9	155.7	130.3	61.8	65.6	136.2	59	58	60.8	90.8	127.3	81.8	12.4	76.8	68.9	68.8	107.4	170.9	59.7	201.6	77.3	220.4	100.9	186.9	208.1	66.7
203877_at	29.4	25.4	14.5	29.6	18.6	11	83.2	35.9	15.6	36.7	111.8	28.2	47.2	42.1	37.4	56.6	77.8	12.8	42.9	35.2	48	17.5	28.6	40.5	29	44.3	110.2	44.6	52.5	71	37.7
203881_s_at	1250.1	1677.4	1484.3	721.4	967.1	978	691.8	946.4	1005	964.2	304.3	976.5	1051.5	723.5	921.5	954.4	568.7	596.8	845.2	933.8	841.9	1018.9	771.5	546.8	635.5	804.9	373.1	951.5	762.5	758.1	619.3
203891_s_at	129.2	209.7	72.6	89.3	56.1	76.5	119.6	127.3	132.1	228.5	191	144.2	72.4	94	113.3	129.2	139.9	182.6	118.3	242.9	132.7	106.9	114.8	143.7	204.4	105.7	278.7	341.7	147.5	283	139.8
203894_at	1036.9	879.8	1054.4	994	966.2	1320.3	866.2	1033.6	1241.2	776.5	1472.6	953.4	824.1	673.5	778.3	908.8	725.4	790.3	932.3	999.6	666.4	674.2	838.8	675	701.7	663.9	680.3	619.6	564.8	585.8	593
203906_at	1859.1	2323.8	2876.7	1228.6	2306.4	1777.8	1750.7	886.8	2471.3	2035.2	2026.1	2138.5	812.9	1452.7	1313.3	3486.7	1883.2	2751.5	2607.1	3157.1	2052	2144.6	2072.5	1138.8	1405.6	1111.5	1540.9	1244	1258.3	1560.9	1448.9
203908_at	1820.9	3102.3	2087.4	1580	2007.6	1878.2	1637.3	1766.9	2673.1	2102.8	2380.7	2108.7	2099.8	1735.5	2570.9	1490.1	1462	2153.9	2535.7	2293	3209.7	2426.3	1323	1753.1	1140	1024	695.7	1788	1483.5	2720.4	998.4
203939_at	237.4	198.9	225.8	168.5	213.3	180.6	214.7	169.7	319.8	183.3	157.6	266.1	238.7	208.3	315.5	169.7	83.5	257	136.3	244.5	229.8	295.4	229.7	69.7	171.5	178	39.6	63.3	133.6	161.6	65.9
203945_at	311.9	329	212.8	554.5	357.4	250.9	375.6	363.4	362.6	415.9	452.1	267.9	310.5	308.1	359.9	370.9	383.6	295	410	401.8	449.7	365.8	288.1	374	650.1	478.1	478.1	721.6	433	412	269.5
203961_at	4081.2	5387.8	4371.3	5401.3	4828.6	4466.4	5410.7	5571.8	6617.1	7239.1	3852.7	5163.6	6157.9	4367.6	6267.5	5285.9	6024.5	5819.7	9281.3	5490	8632.5	8383.9	3920.4	5826.3	7025.4	10009.3	3160.5	9203.7	7829.6	8938.4	4330.3
203975_s_at	65.7	26.6	66.8	140.6	57.6	97	20.9	92.1	54.3	126.5	99.5	65.4	109.4	45.5	30	55.4	51	113.9	67.7	72.4	129.7	19.8	38	35.8	93.6	147.9	131.7	85	172	81.5	78.4
203978_at	283.3	201.8	216.8	259.7	315.1	255.2	213.1	371.8	75.8	399.2	324.5	148.1	408.6	242.9	349.2	276.2	347.7	138.1	285.6	233.5	313	338.2	247.4	348.7	376	238	424.6	331.4	338.8	345.1	406.4
203991_s_at	213.9	231.4	284.2	227.3	579.7	216.2	285.4	146.1	204.2	393.2	235.3	202.7	179.8	387	168	256	399.3	257.7	449.2	364.4	377	314.3	732.5	467.5	272.8	599.7	453.5	296.6	360.2	303	237.6
203993_x_at	9	8.1	9.6	13.4	11.8	10	9	10.8	27.4	12	26.8	10.8	8.4	9.6	17.7	14.4	17.4	11.6	14.6	12.7	19.9	14.4	15.5	16	24.1	14.6	19	14.7	27.6	28.4	9.6
204017_at	189.7	82	152.2	261.4	141.5	157.6	74.9	218.4	237.5	224.9	469.3	111.4	122.4	105.6	175.6	268.9	224.1	107.2	81.5	215.9	91.4	99.7	128.7	224.9	221.8	194.5	340.3	496	341	417.7	218.3
204019_s_at	1861.1	1490.2	1714.7	1687.2	1701.4	1371	1598.8	1597.6	1573.6	1720.8	1085.3	1641	2029.9	1644	1712.7	1126.6	1382	1511.2	1106.2	1447.9	1584.3	1825.1	2085.8	1534.6	1335.2	1704.2	915.4	1377.6	1215.2	1122.7	1307.3
204055_s_at	93.1	221.4	150.2	151	98.6	85.1	72	37.3	150.6	135	51.4	83.9	105.2	26.5	118.5	49.4	28.8	97.1	111	140.8	82.3	29	57.3	147.2	19.6	110.2	6.5	20.3	17.5	21.3	10.9
204057_at	675.4	363	236.3	759.4	362.7	529.2	637.2	601.4	671.5	533.8	500.5	243.3	508.9	676.1	521.9	525.1	494.3	594.6	248.7	328.5	458	527.2	568.1	439.7	460.9	520.7	291.5	469	473.6	354.6	474.3
204072_s_at	1968.6	2002.4	1422	1241.7	1166.9	1655.8	790.8	892.3	747.8	1241	521.4	1769.7	1047.3	937.2	814.9	1322.8	720.2	1347.3	832.9	1399.4	911.6	619.5	921.2	636.9	712.2	761.2	339	1099.8	466.5	601.1	574.1
204104_at	155.8	149.2	143.4	171.9	125.1	184.2	210	171	113.6	202.6	230.3	194.5	143.7	111.8	153.1	151.8	219.5	261.6	249.2	179.6	310.9	208.1	305.6	359.5	301.2	120.9	384.8	229.4	232.5	344.9	225.4
204119_s_at	501.7	337.7	402.8	252.4	316.9	473.8	233.8	330.3	401.2	267.7	193.8	327.7	365.7	324.5	177.5	358.9	213.8	270.5	258.3	294.8	248.3	442.7	280.8	482.3	166.9	319.1	207.3	203.3	267.9	269.2	316.4
204131_s_at	1276.1	2432.2	2066.5	1811.9	1683.7	811.3	2047.5	1727.5	2150.1	2036.1	2500.8	1918.8	1596.9	1389.5	2220.6	1566.4	2530.6	1581.6	3801.7	2461.6	1958.4	1219	2300.2	2157.9	3059.7	2365.5	4068.9	2171.4	3027.5	2889	1286.9
204134_at	2944.4	4923.8	3035.9	3103	2909.3	3439	2588.8	2021.9	3068.6	3083.7	4516.3	4255.7	2357.2	2173.2	2420.9	3438.3	3624.9	4161.5	2939.8	3915.4	2689.5	2032.3	2071	1674.7	1993.1	1364.4	2779.5	2717.9	1691.3	2253.8	1539.6
204165_at	6661.4	8509.5	5214.6	5699.2	4847.2	6229.5	3463.1	4128.5	6471.9	4102.4	2621.5	9123.6	5860	2943.9	4460.8	3911.7	2562.4	4331.7	2480.4	5247.4	5672.1	2739.1	2850.4	2053.4	2616.4	4879.9	1124.4	5048.1	1809.1	1712.7	4875.7
204177_s_at	258.9	294.9	382.1	381.5	373.7	335.1	406.1	231.2	433.3	385.2	583.5	435.4	382.8	383	426.1	365.3	538	368.4	632.7	377.4	564	496	483.5	525.2	415.4	398.6	640.5	500.2	733.8	445.5	394.8
204187_at	201.4	236.3	259	413.9	224.1	235.6	420.9	258.5	464.8	302.7	108.5	318.9	648.4	400.1	401.7	240.1	1120.4	403.1	695.1	430.2	485	759.7	224.5	344.3	731.3	950.3	359.3	569.1	1043.7	453.8	532.7
204224_s_at	207.7	210.9	247.1	253.6	282.8	207.9	176.7	403.2	251.9	152.4	191.5	176.4	148	176.6	219.8	245.1	146	199	224.1	185.5	232	354.5	200.1	228.7	312.4	152.1	92	256.3	127.2	129.1	159.4
204264_at	121.4	93.1	82.1	101.8	91.3	95	133.7	116	170.7	112.6	122.1	108.8	146.9	148.2	193.2	99.3	139.7	159.6	132.3	65.8	145.5	144.9	174.7	94.7	165.4	141.1	132.9	195.9	205.5	235.9	159.8
204288_s_at	671.8	1413.6	817.7	556.7	485.9	1063.9	496	633.6	605.1	739	461.6	1165.2	527.8	620.9	474.2	707.4	666.9	760	776.5	838.2	694.3	302.2	378.5	436.4	467.5	325.3	335.4	445	164.1	232.5	340.1
204297_at	264	374.5	288	249.2	373.2	277.6	335.6	342.8	381	358.4	454.7	253.6	375.3	464.9	376.2	271.9	327.8	357.3	255.3	245.9	432.6	505.6	473.7	299.8	536.3	552.7	388.2	385.5	443.5	598	366.9
204318_s_at	44	8.5	78.7	102.1	64.7	38.6	103.9	112.7	97	178.8	445.7	74.2	84	30.1	160.3	71.9	141.7	144.7	45.8	109.9	132.8	46.4	180.1	160.9	190.1	109.4	278.7	183.7	141.2	134	116.6
204326_x_at	3425.2	6654.4	4738.9	7780.8	6686.3	4147.8	6521.4	9547.4	7112	7940.7	8511.7	10827.4	7658	5782.8	7833.9	6612.7	6678.9	4584.7	9077.1	5763	11789.2	5307.9	6117.5	9658.7	8503.6	9873.2	5622.3	9709.5	10789	8666.2	9456.8
204337_at	4865.4	3438.5	7066.3	1129.4	4291.4	4106.9	2373.6	1329.2	2120.9	5580.9	1434.9	2186.2	928.9	2478.9	821.2	6571.4	1719.9	3890.6	2463.2	6319.6	1680.3	1909.5	2024.4	741.5	1579.4	1467.8	668.5	1850.7	411.9	912.5	684.4
204339_s_at	998.8	548.6	1934.5	367.7	830.5	1248.9	581.6	530.9	575.2	668.5	490.9	664.2	444.3	588.1	432.5	1459.6	738	913.2	483.5	1460.3	566.1	460.5	420.8	456	321.6	573.7	537.6	444.6	292.6	388.4	371.5
204373_s_at	328.5	635	617.6	664.9	555.3	420	565.9	417.2	725.9	839.2	672.6	529.6	634	666.2	781	503.8	517.6	427.6	1217.9	708.6	768.4	485.9	1048.1	600.5	952.1	644.5	996.4	698.9	935.1	759.1	675.6
204376_at	94.7	60.6	68.7	48	18.2	75.4	122.5	39.6	159.8	19	42.1	58.9	68.6	95.3	46	59	153.6	14.8	126.2	44.5	81.6	103.9	23.4	79.5	196.2	53.1	140.4	223.8	187.7	232	187.1
204379_s_at	1938.1	2729.2	2013	1511.8	1268.4	2200.8	1391	1540.8	2728.1	2967.4	2442.3	2613	1907.9	1907.5	3600.6	1277.2	2630.2	3902.8	4489.3	3663.8	3343.9	3488.1	1558.2	1110.4	2783.2	1571.8	6818.4	2182.5	5616.1	3857.7	2957
204391_x_at	421.8	468.4	292.6	495.7	476.3	485.8	465.4	555.4	509.8	650.2	666.1	358.3	412.6	400.6	384.2	411.4	706.5	500	663.1	436.5	442.5	463.2	612	639.9	603.3	400.2	925.1	503.6	643.8	643.7	557.2
204400_at	635.3	688.7	344.2	731.6	436.1	448.5	663.5	445.3	778.1	1046.5	886	409.5	626	1182.2	810.5	397.4	1131.7	674.3	713.1	548.3	625.7	943.1	1100.5	708.6	888.5	445.4	2464.9	251	1349	1319.6	975.3
204404_at	263.3	309	323	351.5	335.5	344.8	416.6	699.9	386.3	382.8	656.9	260.2	780.8	471.4	377.7	398.3	264.9	272.7	313	219.2	312.7	380	454.3	607.1	444.9	297.2	628.1	445.4	483.1	563.2	445.1
204411_at	1332.4	876.1	366.7	535.3	535	381.5	723.6	313.9	541.6	999.2	501.5	727.6	618.1	447.2	385	613.9	262	600.3	724.1	511.9	283.8	211.7	379.1	58.3	1173.8	208.5	103.4	748.6	79.6	129.6	176.6
204436_at	417.5	358.5	493.5	902.4	580	501.5	806.9	889.9	261.2	923.3	1291.6	610.6	524.5	849.9	819.1	1034.6	1020.2	942.4	918.8	703.7	759.4	642.7	674.1	749.5	739.6	706.7	1137.4	630.1	1130.2	1118.3	914.2
204447_at	4082.7	4532.8	3228.5	4315.6	4901.1	5157.7	3944.7	3619.4	3740.2	5595.4	3989.4	4809.3	3393.6	2645.2	2949.9	4904.6	3698.6	4231	3128	4905.7	3765.7	2927.1	3872	3809.6	3371.9	2098.2	3079	5083.5	2954.9	2851.8	1257.2
204465_s_at	3663.4	2305.8	3722.9	1393.3	1631.4	2516.9	1878.5	1829.7	1523.7	2686.2	1568.4	1856	1953	1532.2	1129.5	3744.2	1405.2	1816.5	1351.4	3171.4	1287.7	1122.6	846.2	670.2	1323.9	1361.8	1116.4	1868.1	857.3	1107	1219.5
204474_at	491.3	571.5	580.8	471.1	513.1	628.1	781.4	574.9	462.1	600.4	620.7	411	429.1	482.5	308.3	641.9	438	553.8	611.5	520.3	383.5	361.7	171.7	283.1	595.6	256.4	241.1	449.5	175.1	540.4	388.1
204494_s_at	136	149.8	180.3	217.6	225.3	193.6	254	213.5	225.5	236.4	380.2	151	274.9	251.4	333.1	167.9	194.2	274.4	227.8	270.1	242	263.3	143.2	325.7	399.9	268.7	359.8	164.1	240.3	423.9	272.5
204505_s_at	1060.2	1613.1	2671.4	1014.9	1778.8	2065.6	1438.4	1118.2	1824.5	1040.3	1657.1	2076.5	1889.3	1012.2	1295.9	1425.6	1484.2	2010.1	1751.2	2058.4	1185.5	1242.3	1291.6	1130.2	748.3	936.3	1137.2	1039.1	986.2	704.5	1206.8
204506_at	976.3	1333	1541.7	954	1157.6	1869.5	896.8	997.7	1379.6	453.9	720.2	2134.7	1213.8	912.4	922.9	798.1	889.7	1367.9	714.7	823.1	993	648.8	945.7	575.1	840.4	699.2	809.5	756.9	620.8	603.9	1024.8
204520_x_at	521.1	481	580.5	725.6	484	503.5	349.3	514.7	844.5	648.5	491.4	408.1	660.3	752.2	709.4	647.5	810.9	596.7	796.4	675.9	788.9	779.1	786.2	794.9	750.8	583.9	584	639.2	827.9	608.1	729.3
204529_s_at	630.3	166.9	624.2	130.6	423.4	366.7	313.1	227.2	270.4	504.6	279.1	181.5	169.4	281.1	215.3	732.7	279.9	383.2	280.6	651.3	123	381.5	239.5	318.6	181.2	185.3	221.9	240.7	130.3	188.6	77.2
204541_at	183.2	158.7	165.9	209.5	166	237.2	105.3	223.9	270.4	249.8	603.1	163.2	193.5	203.6	203	87.9	377.7	209.1	352.2	262.7	358.8	263.7	268.5	219.2	254.9	262.5	486.9	258.4	279.4	409.9	297.4
204557_s_at	661.3	681	923.8	506.8	672.6	695.4	581.9	501.9	699	714.8	191.4	722.5	619.9	289.3	507.1	720.2	463.3	531.5	522.6	867	814.9	670.6	494.3	376.4	295.8	454.2	203.5	459.3	388.1	457.5	464
204580_at	163.7	87.6	79	113.9	73.2	105.2	180.4	130.8	108.2	77.4	290.3	86	122.9	84.7	95.3	134.7	122.6	79	84.8	120.9	121.3	87.1	89.9	85	248.4	114	395.2	168.2	171.4	158.5	115.1
204582_s_at	10.8	15	7.1	18	12.1	15.4	56.5	19.7	8.4	23.1	23.1	15.6	18.2	10.9	23.6	27.7	21.3	14.4	18.7	10.7	17	11.7	26.4	18.4	18.5	39.8	33.9	24.3	23.8	28.5	16.7
204626_s_at	207.9	94.3	144	149.1	122.9	178.8	60.1	271.7	170.6	266.6	432	167	193.8	157.2	176.1	316.8	289.8	258.6	86.9	174.9	318.2	147.1	155.4	134.1	366.1	173.8	283	433.1	246.4	345.9	207.1
204637_at	26.2	35.7	26.4	41.1	37.1	29.1	55.3	47.1	38.2	59.1	95.3	44.1	253.2	47.6	27.9	158.4	55.5	17.8	37.7	37.5	53.8	24	124.5	51	70.1	27	70.9	53.4	131.3	49.7	48
204647_at	613.6	667.3	246.2	619.9	274.3	340.8	329.1	359.9	489.8	880.2	363	349.5	607.3	553.8	459.6	230.9	556.7	583.6	661	224.1	629.3	502.9	580.6	783.6	928.7	564.4	817.1	1014.3	548.3	879.4	1399.1
204650_s_at	783.8	724.5	684.5	1027.7	896.6	673.7	873.8	841.8	888.3	1094.2	1598.4	642.8	914.5	588.7	744.1	1038.3	685.5	1028.1	642.6	716	761	562.6	653.7	691.8	1021.7	561.4	1677.3	1067.5	1028.7	1211.3	939.8
204656_at	98.8	156.9	154.6	140.8	168.9	31.8	141.3	234.4	111.8	304.5	190.2	104.4	137.7	191.1	91.7	17	270	207.3	39.2	96.1	123	112.6	263	317.3	268.4	185.5	425.1	43.5	175	169.6	187.9
204685_s_at	3111.1	3095.5	3306	1457.3	2185.7	3267	1542.6	1637.9	1967.6	2267.3	2884.6	3245.7	2578.2	1473.2	1565.5	2806.4	2373	2718.7	1678.6	3523.8	2248.9	1389.5	1070.5	1100	1303.9	1258.2	1076.1	1983.4	1263	1009.5	1297.3
204701_s_at	540.2	703.8	701.9	683.4	689.8	893.2	310.6	370.8	826.9	352	731.7	566.3	551	467.4	617.1	561.6	535.3	658.8	379.4	654.1	469.6	454	708.9	321.8	214.7	422.9	663	407.8	363.5	100.9	675.4
204716_at	444.6	508.1	373.3	444.5	443.3	472.4	394.5	458	363.3	358.9	526.1	415.7	447.8	265.1	428.9	465.5	441.2	404.7	391.4	334.5	536.7	334.8	556.2	338.9	358.4	470.6	150.3	508.5	298.2	329.2	315.9
204731_at	266.8	224.6	237.5	348.4	313.1	317.8	498.6	352.1	494	410.4	255.5	411.9	537.3	346.6	559.2	373.4	461.1	360.5	824.1	335.4	591.1	628.9	274.7	622	778.8	901.1	302.9	608.2	527.6	873.8	418.1
204743_at	2320.3	2339	4528.5	1998.1	2835.1	5074.7	2083.3	1957.6	2515.7	2087.3	2218.9	3158.6	1766.7	2285	1901.1	4027.1	2279.3	3126.4	2879.6	4590.7	1723.5	1685.1	2052.1	1801.6	1390.5	1635.2	1516.4	1575.2	1490.6	1292.5	1229.2
204777_s_at	4410.8	3557.1	2198.9	2749	3604.8	2643.9	4251	3419.8	3212.5	4262.2	4099.6	2639.7	3104.5	7145.8	4048.5	2321.7	3824.7	3714.7	3595.6	2861.8	3021.5	4070.2	4724.7	3426.6	6303.2	2126.9	6148.6	2227.8	4987	5732.6	4839.7
204785_x_at	366	265.6	356.7	444.6	542.9	369.5	401.8	644.5	554	726.2	1057.2	327.1	631.1	184.2	507.6	520.4	494.4	438	454	472.1	457.8	324.7	413.4	739.8	610.9	375.1	592.2	679.3	618	1065.7	560.3
204803_s_at	34.6	9.1	61.3	60.3	5.1	13.3	20.3	7	5.8	21.7	9.9	9.8	25.2	5.2	20.6	39.5	31.2	29.1	9	66.9	57.9	80.6	30.8	28.9	22.5	86.7	59.3	58.2	23.8	181.6	23.8
204822_at	59.2	95.1	35.8	61.1	41.7	32.6	67.2	74.2	107.2	26	34.7	49.9	32.2	21.2	36	38.4	13.8	40.2	36.1	58.6	43.9	54.3	56.2	39.8	43.1	30.5	11.2	20.2	48.2	47.6	44
204843_s_at	149.3	63.2	88	72.3	94.7	70.3	136.2	144.6	44.2	207.1	436.7	68.6	144.3	172.5	145.5	21.3	162.9	101.5	73.6	76.8	76.6	93	188.3	276.3	374.9	100.2	389.8	43.8	164	150.3	157.3
204869_at	3014.6	3942.7	2420.2	1171.6	1252.1	2198.7	668.2	686.3	1355.6	1458.6	1063.9	2709.1	892.7	556.9	1379.7	2995.1	1102.2	2206.3	854.7	2066	2328.3	1098.1	1144	541.8	652.1	540.7	666.6	1025.3	297.9	976.9	836.6
204870_s_at	484	716.6	1088.1	534.7	458	998.4	480.9	503.3	357.6	352.4	161.6	1247.5	522.5	312.7	355.8	1250.4	538.9	700.3	622.7	1194.8	421.5	334.7	342.1	102.8	307.3	287.8	286.9	432.4	143.8	137.2	256.7
204881_s_at	437.7	642.5	463.1	465.5	549.3	578.5	648.7	616.6	497.1	589.6	393.9	636.5	642	579.4	449.3	616.4	660.2	548.6	732	686.6	787	593.1	523.4	467	785.4	563	671.6	668.8	598.3	702.9	675.7
204900_x_at	521.9	465.7	442.5	414.8	467.8	383.8	500.4	492	326.1	686.5	260.4	270.6	583.6	658.4	453.1	364.9	288.3	375.2	301.2	339.8	549.4	456.8	441.5	704.3	927.4	761.1	182.4	746.9	475.2	669.3	614.4
204912_at	227	222.8	239	332.3	253.7	150.2	221	307	266.2	207.2	348.3	365.8	254.8	280.6	342.8	360.1	390.7	240.9	447.8	216.5	443.7	258.9	336.3	325.3	353.4	416.4	534.3	452.3	600.8	697	257.6
204916_at	986.8	1185.1	502.4	843.5	722.5	943	802.3	834.4	970.7	617.5	935	943.8	725.8	773.7	911.4	978	886.1	862.6	922.4	895	1135.9	1240.2	749.6	1000.2	1415.8	1095.4	799.7	1205.7	1110.4	993.9	1075
204932_at	48.2	35.2	27.6	100.7	58	46.7	43.6	59.4	64.8	61.2	137.4	41.7	76.1	60.8	76.4	39.4	96.3	23	135.5	77.8	49.5	74.3	90.4	48.1	140.8	52.2	128.2	170.5	110	91.9	69.6
204964_s_at	107.7	258.5	271.7	389.5	125.6	375.8	271.1	465.3	301.4	270.8	105.3	384.3	577.6	372.3	579.9	247	534.5	461.4	408.9	433.1	399.2	683	219.2	269.3	428.7	321.6	410.8	1080.7	735.5	479.7	572.8
204966_at	3270.4	3024.8	2133.9	2597.9	2602.7	4106.1	1867.6	2619.7	3057	1730.2	2360.8	4861.4	1778.2	1901.3	2506.7	2030.2	2691.7	3604.1	2525.9	2254.9	3312.1	1766	2073.3	1701.6	1068.4	1267.4	1843.8	2053	1895.8	2062.5	1510.2
204982_at	23.1	10	15.3	26.9	24	23.5	28.9	29.4	39.1	11	49.8	15.1	25.7	23.3	27.1	24.7	37.8	24.7	26.6	25.7	32.8	20.6	18.5	75	38.2	14.4	42.9	41.4	34.9	45.7	31.9
204984_at	172.1	250.2	213.6	226.9	119.5	271.9	316.7	313.3	386.7	304.4	395.9	286.6	452.4	128.1	292.5	285.5	218.2	317.1	172	238.1	511	423.7	376.3	404.2	272.6	373.7	409.1	500	477.4	511.6	362.7
204993_at	1066.2	1564.7	1004.4	1057.7	664.8	1168.2	817	861.7	902.3	1096	1450.2	1135	1079.3	1124.4	1001.4	1097.8	1252.4	996.5	1252.7	1068.4	1291.8	742.5	938.7	874.8	1288.4	979.1	1857	1248.4	1214	1209.3	1446.7
204996_s_at	20.5	24.3	16.4	9.9	25.5	38.7	16.9	31.6	92.3	72.9	67	13.1	46.1	32	23.4	122.6	68.9	11.2	13	8.4	77	18.8	27.1	100.8	46.7	31.8	102	113.9	68	36.3	32.1
204998_s_at	185.7	194	122	271.3	206.2	217.5	313.4	250.4	185.2	240.6	519.9	172.7	313	161.2	243.7	306.6	288.2	250.6	305.5	240.8	234.9	125.2	256.9	302.6	310.2	421	367.7	366.2	308.5	182.9	284.7
205003_at	9049.6	11512.1	2657.7	5054.4	5436.6	6362	3939.2	3220.8	5412.3	4606.6	4171	6340.6	4566.7	3965.5	4898.8	4392	4167.3	5676.7	5616.4	3561.1	4845.1	3758.8	4933.3	3998.2	4761.9	3194.1	2785.8	5039.5	4044.5	4286.5	4453.4
205046_at	17.1	7.1	12.6	9.2	10.1	9.6	31.4	43	11	12.1	42.3	9.2	25	14	22.1	36.8	30.7	23.7	27.5	24.5	21.2	14.5	38.4	12.3	45.9	15.2	21.6	41.2	27	51.7	17.7
205070_at	223.1	402.6	471.9	334	272.2	326.3	575.4	258.9	314.9	430.2	331	254.4	309.6	289	349.4	258	574	331.8	514.5	427.8	294.4	516.8	480.3	736.4	471	447.5	404.7	384.6	399	416.7	414.3
205084_at	221.5	69	194.4	80.8	201.9	146.8	159.6	343.3	110.7	90	75.2	104.1	195.8	112	172.5	206.5	11.8	112.2	116.1	182.2	140.8	162.4	128.3	178.7	37.6	135.4	133.4	21.3	86.9	51	142.6
205113_at	6612.8	5939.6	4230.7	1766.3	4111.1	6570.1	1787.4	2623	2906.2	2964.2	1943.5	5339.9	2978.5	3096.4	2741.3	9298.2	2036.9	5024	2616.7	5770.3	2242.5	1900.3	1987.8	1037.8	1708.6	1743.1	679.7	1745.9	706	861.3	1797.2
205115_s_at	182.2	144.6	151.5	210.5	205.8	201	218.9	245	239	249.4	528.9	138.1	179.7	163.1	204.6	194.3	294.3	184.6	289	188.9	216.5	178.1	258.7	209.1	267.4	288.6	230	353.1	316.4	366.7	200.6
205136_s_at	539.6	516.7	466.3	494.4	519.5	778.9	569.1	471.8	617.6	564.8	499.2	568.1	599.9	504.3	435.4	579.2	453.7	499.8	414.5	577.6	471	517	492.5	418.3	422	453	431.6	588.8	468	393.3	456
205137_x_at	182.6	276.2	154.5	324.5	127.8	127.2	159.6	397.4	677.7	74.2	116.5	295.2	433.1	443.8	509.6	228.1	759.5	469.1	397.9	260.2	492	445.5	310.1	317.8	544.8	407.1	453	827.3	786.5	429.1	508.4
205143_at	3158.9	2760.1	4235.9	4664	2501.2	4608.7	3812.4	2796.7	4279.9	4365.8	6800.6	4023.8	2718.5	3975.3	4191.9	4860.1	3289.6	7264.4	4135.9	4461.6	4747.9	4072.7	2024.5	2694.4	1685.4	2149.5	2359.5	3138.3	2477.1	3220.8	1744.5
205152_at	3047.6	2250.2	3188.8	2004	2495.1	2824.7	2468.2	2265.3	2214.9	2631	1488.7	2740.8	3193	2803.4	3125.7	2526.1	1637.2	2870.6	1944.1	2637.7	2292.8	3152.2	1982.7	1919.7	1339.8	606.2	1115.5	1347.1	2035.5	2019.9	2773.9
205159_at	161.9	66.6	165.5	200.2	135.6	147.6	251.3	238.5	109.4	177.3	147.1	160.4	208.8	118.9	223.8	246.3	243.2	134.6	202.2	144.9	197.4	125.9	88.5	147	253.6	208.6	174.4	175.4	250.8	391.9	231.2
205160_at	265.6	324.9	330.9	323.5	327.1	250.7	279.2	335.3	356.8	360.2	131.9	274.6	260.5	354.4	492	374.9	209.5	147.4	232.9	391.5	408.6	581.8	203.9	65.2	359.2	469.5	148.8	365.1	435.1	449.5	226.1
205164_at	243.3	226.9	156.3	162.5	245.5	220	58.3	142.7	133.2	46	88.1	148.2	40.7	74.9	142.4	64.2	160.9	78.5	171.2	54.5	118.6	36.3	49.6	52	130.5	119.1	59.9	107	55.3	57.2	152.5
205171_at	417.4	422.9	387.7	366.4	322.9	416.7	350.5	393.2	344.6	213.5	339.6	480.9	574.3	209.4	391.3	387.1	213.3	246.8	225.7	303.2	320.5	61.8	89.2	84.3	192.7	353.4	339.4	21.9	290.9	234.9	286.9
205216_s_at	5.6	7.9	11	8.3	11.1	14.2	14.1	14	6.9	12.6	23	7.2	15.8	5.6	33	13.1	7.8	12.5	15.2	12.3	45.9	4.3	18.3	18.7	8.1	15.5	16.2	42.6	15.8	13.8	19.7
205225_at	172.6	60.8	156.2	169.5	172.2	153.1	224.6	171	250.3	188.5	542.2	136.5	201	254.7	133.7	259.2	214.9	181.6	185.2	181.3	178.5	179.8	212.2	192.3	365.2	205.4	543.6	286.7	186.2	496.9	177.3
205237_at	76.5	81.3	68.3	96.2	81.9	82.7	103.9	212.3	55.2	139.4	139.1	64.1	122.3	81.2	132.4	120.3	151.3	107.9	182.7	51.2	49.8	48.6	72.6	179.5	172.8	104.4	152.3	141.4	136.2	211.4	83
205247_at	338.7	349.1	255.2	318.4	309.7	198	561.5	335.5	311.3	403.4	570.7	276.4	243.9	317.3	360.4	344.6	377.6	251.3	449.2	417.8	303.3	279.7	389.3	464.4	362.1	225	529	667.4	532.6	646.8	354.2
205251_at	881.1	871.4	724.2	902.1	648.1	1445.8	492.3	627	1109	1121.2	968.5	974.1	543.8	724.6	771.8	1080.3	1085.4	1166.3	811.8	1296.6	826.4	1004.5	881.4	857.4	887.7	1075.6	1106.3	1066.9	1318.6	1463	1189.6
205296_at	56.3	39.4	37.1	99.1	21.5	15.6	65.2	37.2	58.3	78.1	51.1	42.2	59.7	113.6	112.9	78.6	128.1	67.1	89.3	80.4	82.1	79.2	145.1	118.3	95.4	78.8	218.7	79.6	184.5	66.3	41.8
205297_s_at	14	26.5	46.6	35.8	63.4	11.2	24.2	25.8	137.5	118	80.8	110.6	63.6	28.8	81.5	19.6	140	50.4	71.7	26.8	59.2	23.9	31.2	32.1	96.3	48.9	330.8	198.1	162.7	198.6	68
205298_s_at	261.6	221.7	177.8	209.8	260.7	249.4	183.6	233	262.7	261.2	274.4	177.5	230.2	219.8	196.6	319.4	238.6	261	250.6	244.8	199.9	264.2	146.8	196.4	350.9	279.9	332.8	325.4	302.1	354.6	232.3
205311_at	20.1	17.2	24.9	69.7	19.4	18.9	12.6	10.8	53.4	134.2	22.1	10.3	35.5	129.2	71.9	49.4	92.4	71.4	63.1	5.5	24.2	19.9	9.5	13	31.1	26	43.9	39.1	41.1	34.1	70.4
205323_s_at	246.3	493.4	389.2	470	327.1	346	497.9	504	493.7	440.2	549.7	310.6	521.3	550.2	500.9	456.2	457.7	475.6	637.3	517.5	538.4	510	548.4	616.2	720.3	542	505.5	453.9	632.8	693.7	441.6
205328_at	1225.8	824.6	1247.3	830.8	1137.9	1268.8	1684.7	1707	1260.4	1068.5	772.5	918.2	1598.7	1145.9	1028.4	916.5	377.4	1227.1	557	1074.1	1227	1276.1	552.4	487	632.2	836.6	415.3	1152.9	402.7	782.1	437
205344_at	437	204.2	567	490.4	264.3	592.7	448.1	308.7	168.2	200.1	41.4	452	403.1	441.7	319.3	412.7	41.4	539.9	74.3	295.4	301.4	359.3	171	185.5	48.9	59.4	40	352.6	48.6	41.6	168.1
205352_at	5449.1	3706.9	6535.1	2225.4	3911.6	4494.2	2399	2488.1	1841.8	3122.3	631.3	4379.4	2717.6	3227.1	1623.3	4011.5	1369.2	2303.2	1698.9	3698.4	1408.6	2024.8	1602.4	1858.4	2029.2	1620.7	261.8	1596.1	641.3	1182.3	2387.7
205356_at	556.6	362.3	574.1	459.7	417.4	487.7	595.6	523.9	580.6	566.3	628.1	353.2	589.3	580.7	621.1	421.6	768.1	502.8	826.4	569.4	282.9	460.7	456	485.6	713.5	345	1112.6	464.3	763.5	692.9	662.8
205357_s_at	98.9	67.9	51.1	62.7	80.6	88.7	93	91.8	187.4	104.6	71.8	77.7	126.4	73.7	107.7	174.3	148.6	118	78.7	108.1	99.7	166.7	142.2	111.5	138.4	178.5	306.8	117.4	110.8	186.4	98.4
205358_at	8588.1	15786.9	7882.2	7321.5	7481.1	7856.8	5684.4	6428.7	8160.3	8476.3	7208	9308.5	6362	5900.4	6623	7151.8	8416.1	7345.6	10357.7	8908.6	8817.7	5446.3	7250.1	4064.6	5435.1	7439.7	3845.5	10129.1	4537.9	3985	4893.2
205383_s_at	2845.3	3964	1263	3523.2	2481.2	1870.3	2867	3049.8	3193.8	4332.4	3396.8	2353.2	2589.3	2557.7	3171.3	1589.1	3091.5	3155.8	4708.9	1945	4710.2	3365.5	3500.5	4345.2	5007.9	6190.3	3502.6	5849.4	4229.8	6078.8	3097.2
205388_at	137.8	161.8	112.6	138.8	122.7	113.1	170.2	161.5	167.9	149.7	201.7	134.9	74.3	134.2	120.9	102.5	153	122.9	45	171.8	96.8	142.1	222.7	93.1	48.5	150.3	58.2	66.5	112.5	112.5	98.9
205398_s_at	26.8	24.9	21.8	27.8	30.7	26.5	39.5	34.6	28.9	38.4	71.6	35.4	38.1	49.1	29.6	47.5	35.2	199.1	20	44.5	39.6	39.6	17.3	51.4	64.2	35.7	49.6	59.7	39.6	50.8	39.7
205436_s_at	1518.8	1936.3	1119.4	1486.8	1618	983	1406.4	1120.2	1346.3	1901.1	2095.3	1204.6	1283.6	1431.6	1223	1156.8	1812.9	1301.7	1580.2	1321.9	1277.8	1047.3	1263.7	1372.9	2961.3	1725.3	1834.3	2575.3	1704.4	2241	922.8
205445_at	160.9	137.8	152.4	186.7	169.7	184.6	326.9	173.3	198.1	263.7	543	133.5	190.6	113.7	248.4	236.3	256.8	190.6	181	153.3	170.1	177.2	188	190.9	245.4	200.3	239.2	250.2	344	352.1	134.4
205454_at	6191.4	9984.5	1665.3	4356.1	4716	8392	1352.3	5577.9	4887.1	879.2	6467	9720.5	5910.9	2871.8	3660.9	1317.2	3309.1	8962.7	2616.9	1738.4	5451.1	1275	2609.7	2328.3	4262.9	3796.1	717.3	4459.8	1674.3	1542	4475.1
205455_at	135.2	190.7	183.3	125	208	105.9	416.2	157.9	49.4	138.5	96.9	125.2	175.4	138.4	215.1	165.8	136.9	121.1	222.6	160.4	149.1	114.2	234.1	183	285.2	241.2	538.7	313.7	288	352	58.3
205459_s_at	192.7	106.4	205.1	62.5	103.5	116.2	69.7	117.3	58.7	208.6	156.2	188.3	93.3	106.7	186.6	89	15.7	124.3	35.8	166.1	197.7	62.2	29.1	22.6	56.5	190.4	31.4	55.8	65.9	57.3	42.6
205461_at	68.4	65.4	69.2	39.7	101.5	84.8	39.6	24.8	193.5	91.3	119.4	108.8	71.2	58.7	23.4	19.7	106.4	14.6	163.5	13.1	63.8	31.3	59.9	130.2	31	36.1	160.2	13.7	28.7	20.8	13.4
205476_at	16.7	9.8	6.1	12.4	8.9	9.2	5.4	37.3	9.9	10.3	10.7	7.1	14.7	9.2	6.8	12.7	23.9	10.1	19.1	9.6	11	8.5	15	16.6	23.5	15.4	43.3	26.3	11.1	35.5	13.8
205489_at	5695.9	2795.5	2704.7	912.3	2580.2	5627.7	1100.3	786.1	1503.3	1861.6	1706.6	2928.2	1463.9	2337.9	1356.3	4452.7	1607.3	3625.7	2196.5	4572.6	1865.1	1688	1598.5	749.6	1330.5	519.6	979.8	1116.7	548.3	990.1	1120.2
205549_at	4950.8	1678.4	1885.3	1248.4	2701.9	4694.8	2436.3	1650.9	2439	1522.3	408.7	1912.1	1284	2628.3	555	6187.8	2683.8	2567.6	1974.1	3745.3	1784.5	1842	2326.6	1736.2	1689.2	1345.1	350.5	1611.5	498.7	1170.4	989.1
205551_at	5107.8	5761.9	5498.7	2828	3876.4	5223.4	2044.1	2582	3203	3800.7	2711.2	4255.1	3427.1	2292.1	2426	4920.8	3089.4	4082.9	2766.9	4639.9	2619.3	1478.8	2067	955.1	1803.9	2308	1336.8	2560.4	624.3	1376	3704.3
205557_at	20.1	16.9	13.9	23.4	21.8	13.4	17.5	14.5	23.9	29.9	79.3	9.3	20.8	8.4	43.9	21.7	50.7	32.8	10.8	25.4	30.7	16.9	29.4	22.1	34.5	21.3	33	29.1	30.4	23.5	37.3
205588_s_at	81	97.4	139.6	23.5	111.8	85.9	183.9	88.3	124.3	105	51.3	109.6	24.6	105.9	125.2	212.7	105.3	112.8	85	237.8	27.1	182.7	138.5	91	64.6	203.9	61.2	32.7	78.1	78.6	74.7
205638_at	3419.5	3453.7	2310.7	1327.6	1913.9	2618	1311.4	1519.6	1355.5	2217	1147.8	2525.9	1890.4	1266.8	1567.6	1795	1258.4	1693.4	1442.4	2428	1689.4	1171.6	1347.9	761.2	1209.8	1131.5	693.7	1887.1	874.5	1180.4	1413.4
205646_s_at	550	877.2	717.3	1308.4	838.7	719.1	1443.8	1309.2	1397.9	1337.2	2272.6	706.8	909.4	897.8	1323.2	893.8	1625.3	1097.5	2500.9	1144	1255.2	1599.9	701.5	1601.6	2173.6	1939.5	2518.9	938.1	2778.7	2893	1036
205651_x_at	1360.4	883.4	2180.8	1530.2	1818.5	1191.4	1144.9	1432.5	1382.2	1415.8	1055.2	1181.8	1736.2	993	1373.3	1867.3	675.6	902	1143.1	1741.2	1533.6	1115.2	2352.4	1625.6	802.6	991.1	884.2	915.4	1122.9	788.8	1775.5
205665_at	12.5	15.6	14.4	19.2	13.7	18.5	60.9	19.5	94.2	28.8	30.4	9.3	21.2	21.2	34	12.2	79.8	10	48.2	14.1	25	38.2	10.8	19.4	59.7	39.1	26.2	22.8	25.9	39.7	48.5
205691_at	4662.3	3825	3887.5	2265.3	2416.8	2767.5	2363.5	1533.8	1618.4	3541.3	1345.5	2375.7	1794.8	1750.7	909.8	3491.9	2147.8	2727.3	1999.1	3090.1	1143.4	1016.5	1275.8	716.5	1841.7	710.2	1074.3	1991.5	603.8	1225.2	672.9
205711_x_at	4576.3	3895.5	3273.9	2838.5	2754.1	4363.6	2271.3	3670.7	1986	2728.6	1538.8	3860.7	2988.9	2558.4	2262.7	3503.4	1959.6	2628.1	1383.4	2642.4	1600.4	2457.4	1830.5	1768.4	1775.8	1826.2	939.5	2585.4	1234.2	1575.2	3848.6
205720_at	22	13.9	12.8	18	13.4	9.4	18	21.6	17	15.4	62.6	12.8	14.7	13	13	70.4	13.7	11.5	8.5	10.9	21.7	13.8	18.8	17.2	33.5	27.5	56.3	20.1	22.1	19.4	23.2
205724_at	138.2	36.8	132.3	111.3	81.3	182.7	293.7	245	144.3	198.9	283.8	128.8	160.1	109.1	248.1	212.4	264.8	207.2	117.9	233.3	159.4	42.3	79.9	137.2	237.6	154.6	217.1	210.7	257.9	330.4	189.9
205730_s_at	204.8	121.6	324.6	274.6	210.4	272.6	314.3	327.2	310.1	244.6	736.8	236	356.7	340.9	495	245.2	386.2	611.2	397.4	302.3	585.9	742.2	558.3	363.6	444.2	421.1	400.7	77.9	539.2	424	288.5
205737_at	6195.3	4739.2	2476.3	2643.4	2638	4015.9	1898.8	3076.2	2525.7	3459.2	2698.8	4458.7	2818.5	1399.2	1867.2	1810	2233.3	3484.9	2485.2	2924.3	2702.5	1201.2	1455.2	1134.2	2194.1	2418.1	1400.9	3050.7	1540.6	1789.5	2183.6
205753_at	51.2	18.2	10.3	34.4	39.2	15	32.7	131.6	98.6	45.9	63	17.3	103	30.6	52.8	34.2	27.9	89.7	143	116.3	128.3	37.2	14.6	9.9	114.1	57.1	159.2	151.7	84.4	41.2	72.8
205776_at	86.4	67.5	103.3	199.6	172	126.7	213	109.9	135.9	208.5	349.9	96.8	181.6	163.7	219.3	162.4	147.4	137	164.5	150	147.5	132.4	164.8	240.1	256.4	154.4	210.1	177.5	235.4	279.6	156.2
205801_s_at	442	291.8	193.8	231.1	317.6	88	216.3	313.2	271.8	330.7	165.8	95.9	237.9	1083.4	329.8	175.4	730.5	567.9	236.1	132.4	219.4	527.1	686.2	847.7	743.2	258.8	652.6	390.4	571	445.5	396.5
205813_s_at	34.1	28.2	27.5	40.4	29.1	36.2	44.6	39.1	34.4	59.7	84.4	34.1	28.3	25.7	34.8	31.9	43.4	31.3	34.2	39.1	23.6	26.6	30	35.9	46.2	34.6	60.4	43.9	41.7	65.1	54.7
205816_at	67.7	35.2	117.6	111	127.7	77.7	101.7	40.3	156	121.5	162.6	74.6	93	54.8	174	45.2	145.5	81.3	189	111.9	137.6	179.4	212.5	103.5	161.4	216.1	153.9	156.3	223.1	165.7	121.1
205825_at	856.6	298.6	965.7	39.8	244.2	534.6	164.7	16.6	109.4	459.2	30.1	217.1	53.3	326.5	265.4	1018.6	236.9	352.7	16.9	717.4	245.7	237.5	193.8	11.6	23.2	89.4	18.1	81.5	106.6	15.8	155.9
205839_s_at	790.2	982	745.1	841.9	711.1	1015.2	731.8	1002.6	778.9	443	1687.3	791.1	798.7	652.3	556.4	745.4	626.1	618.8	669.4	954	659.5	493	546.8	477.7	646.5	424.1	772.7	637.6	550.3	710.7	424.4
205883_at	646.5	1354.6	1952	1833.3	1812.7	1201.8	1969.9	1377.1	1529.9	1935.3	2052.5	1635.1	1096.2	828.3	1162.3	1691.1	3003.2	1170.6	3701.9	2641.5	1783.8	1182.6	1887.1	1725.9	2750.2	2417.4	3859.8	2125.8	2692.8	2374.8	1287.7
205886_at	83.5	172.8	134.7	165.9	124.8	140.9	123.9	177.5	168.1	139.9	293.5	115.9	140.3	154.4	196.9	163.5	171.6	123.9	115.6	149.2	148.8	133	205	151.9	231.6	169.5	370.2	340.7	200.4	271	169.8
205891_at	429.3	419.9	431.6	415.5	369.3	397	444.2	723.8	479.9	325.6	543.5	369.1	551.2	257.2	386.4	340.6	323	317.4	258.8	361.8	595.8	251.8	314.5	190.2	402.1	268.8	117	356.6	299.7	501.2	189.6
205918_at	495.6	958.1	516.6	717.7	528.9	812.1	389.7	567.3	439.1	228.4	482	813	496.4	441.4	386.8	519.2	735.3	996.7	521.4	731.6	661.8	293.8	360.9	117.4	363.2	414.1	279.4	470.2	251.4	33.7	288
205922_at	7.7	8.2	5.9	19.3	8.7	9.4	10.8	16.5	9.5	13.4	46.2	6	9.2	6.6	14.7	10.6	9.8	12.1	9	16.6	10.1	8.2	10.6	10.9	14.1	13.7	21.1	45.3	10.2	14.2	10.8
205924_at	369.8	66.7	207.2	91.1	183.2	60.2	29.9	193.7	16.1	75	46.9	337.5	82.4	8.1	18.5	107	221.5	123.7	39.4	13.9	186.5	10.6	21.1	33	18.4	22.2	19.3	33.7	15.2	13.1	59.7
205932_s_at	467.2	783.8	460.1	575.2	619.1	480.1	682.7	597.2	699.2	1207	659.4	289.3	614.8	496.4	702.7	761.5	641.4	664.8	840.1	699.5	619.1	709	937.8	1115.8	1470.7	1998.1	548.2	1704.7	832.7	1216.3	373.2
205947_s_at	10.5	9.3	5.3	10.5	14.3	7.3	19.1	5.3	15.3	6	38.2	11.1	7.8	10.4	5.5	5.2	19	22.6	28.5	27.4	12.6	11.5	17.4	14.2	27.9	16	15.7	12	16.9	22.7	28.9
205948_at	464.5	228.9	1509.9	461	463.5	468.2	608.9	555	527.3	888.7	420	449.3	349.3	374.9	214	1331.6	503.3	423.9	425.1	1239.6	102.4	430.6	282.3	419.4	326.3	37.9	487.1	20.4	69.6	443.9	364.7
205950_s_at	188	222.7	182.1	160.8	226.2	199.2	47.8	66.4	145.4	152.6	493	54.6	126.4	36.3	169.5	192.3	295.6	89.4	136.8	37.9	87.3	91.7	393.1	292	261.8	288	664.4	239.6	45.4	306.7	151.7
205956_x_at	227	244.4	167.6	209.6	277.4	194	201.9	298	271.7	378.5	641.7	127	190.9	329.8	313.4	365.8	454.6	229.9	378.8	310.2	306.8	256.3	296.3	372.2	498.1	371.2	496.9	425.5	435.6	331.5	257.9
205965_at	38.3	41.8	39.9	299.5	42.9	45.6	52.4	281.9	53.8	175.3	308.6	95.6	52.8	47.7	132.8	80.4	81.2	56.3	60.2	129.3	75.7	194	63.9	71.3	229.1	55.9	54.7	169.1	182.8	276	202.1
205978_at	689.7	882.6	70.7	493.7	560.9	374.1	218.9	243	380.8	74.6	340.1	690.3	700	251.5	375	301.9	271.1	226.6	354.6	172.1	482.9	103	253.1	269.6	205.8	61.2	18.6	245.7	163.2	213.9	95.6
205979_at	2.4	3.5	3.2	4.4	4.1	2	3.4	18.9	4	3.1	33.6	6.1	12.8	5.5	3.5	4.1	5.4	3.8	3.3	3.9	3.5	11.9	7.8	4	16.3	5.4	24.2	56	82.9	5.3	19.9
205981_s_at	410.8	215.4	334.2	323.8	237.7	268.1	309.3	273.5	107.8	339	299.4	223.4	381.4	209.1	157.2	279.9	145.1	270.2	134.6	240.5	330.5	318.5	341.3	367.4	358.5	378.1	365.6	361.8	273.9	512.2	381.6
205985_x_at	16.4	11	12	25.2	17.6	13.5	23.2	15	16.7	13.5	25.5	18.4	41.1	23.3	21.2	14	16.6	28.9	39.2	10.3	12.8	9.9	41.1	30.9	18.6	22.4	25.3	17.4	21.1	29.6	32.4
205992_s_at	117.7	165.2	122.6	159.1	118.7	83.1	114.6	159.8	22.4	92.4	208.4	78.1	113.3	129.5	82.3	174	171.8	101.9	22.4	85	215.4	175.4	151.8	168.4	201.3	184.9	382.9	224	181.7	221.5	133.9
205998_x_at	446.4	670.1	677.6	627.4	600.6	530.4	688	610.2	982.3	742.2	1111.4	530	571.3	548.5	555	998.7	763.5	647.6	593.8	706.5	839.3	626.5	580.8	927.6	871.8	753.8	1004.6	851.9	1184.5	645.2	767.2
205999_x_at	75	132.9	22.1	28.6	37.6	22.6	40.2	28.7	74.3	175.4	157.5	21.5	131.1	34.9	158.5	156.7	48.6	86.3	30.9	74.7	72.2	95.9	135	208.3	206.5	233.9	123.9	56.5	192.6	223.6	121
206001_at	1445.9	1324.2	1000.9	849.6	1605.7	1019.2	1195.3	956.2	883.9	1145.9	966.5	1698.1	656.8	976.5	414.8	1836	2137	531.4	724	657.5	375.7	523.3	466.4	466.1	772.4	252.9	954.8	476.6	430.9	599	1218.7
206002_at	55	115.8	40.8	110.8	87.6	88.3	71.3	157	118.3	142.6	52.8	138.5	178	102.9	74.3	94.1	108.5	145.7	89.7	116.1	208.8	111.1	205	86.9	160.5	126.3	147.8	469	93.3	139	158.3
206017_at	361.9	631.2	541.2	267.1	323.9	468.9	228.3	272.5	317.8	205.2	385	507.4	412.9	138.2	340.9	269.7	229.3	303	265.8	445	210.2	320.4	239.9	137	142.6	140.2	157.7	234	96.5	219.4	237.9
206067_s_at	3.7	11.9	4.2	4.5	12.2	7.9	8.4	4.3	15.9	6	29	7.3	5.4	8.5	22.7	6	15	8.1	7.3	15.4	9.9	34.4	5.5	10.8	23.9	12	36.4	15.9	24.9	23.6	10.8
206073_at	21.1	88.9	188.4	236	198.6	251.3	152.7	255.8	227.8	84.8	235.3	159.9	107.6	201.7	158.2	214.7	323.6	271.9	127.6	292.3	97.3	165.6	123.1	185	27.6	148.2	59.7	113.3	156.3	119	121.7
206084_at	349.6	226.7	316.4	197.5	253.3	216.7	171	94.7	264.6	276.9	390	233.3	108.2	124.5	125.2	390.8	327.7	264.2	243.7	269.7	192.5	235.7	107.1	117.9	31.8	156.8	199.8	174	124.8	135.6	174.8
206094_x_at	242	179.8	202.9	213.8	176.1	135.3	436.1	213.1	234.1	136.9	422.4	134.2	261.1	199.8	263.9	237.8	257.9	154.9	192.6	285.5	281.4	147.4	363.8	140.4	249	298.7	402.5	436	304.8	434	227.6
206101_at	227.1	143.4	157.6	393.3	175.5	232.1	259.6	288.8	364.2	190.7	357.4	223.2	483	199	416.8	234.3	760.3	551.8	290.9	166.9	256.3	1124.1	349.8	447.4	299.7	488.4	300.4	577	554.9	471.4	608.2
206127_at	15.9	92.5	14.7	85.3	73	15.8	28.7	52.8	168.2	21.3	45.3	91.8	192.7	85.6	25.7	171.3	144.3	85.5	92.5	101.4	33.9	42.4	25.2	178	194.4	111.7	178.9	189	120.1	139.6	89.1
206134_at	62.6	57.4	54.8	28.9	80.2	42.5	210.6	66.4	45.2	89.7	66.7	94.6	38.5	55.5	55.4	81.2	139.6	74.3	109.5	79.7	47.3	88	184.4	113.7	66.8	82.6	66.6	131.1	100.7	110.8	67.8
206136_at	11	19	15.4	17.3	18.7	6	25.1	14.6	12.8	32.6	38.3	18.4	18.5	26.2	29.8	29.3	29.8	9.5	20.1	15.4	24.8	11.7	25	27	34.8	23.8	39.7	25.2	21.4	41.4	15.3
206137_at	620.4	880	1241.5	713.5	825.7	766.2	805.5	461.9	791	1191.5	638.8	547.8	672.4	546.9	481.3	593.3	472.1	762	637.7	965.3	411.8	386	316.9	423.2	308.5	456.3	105.9	166.5	368.5	342.7	637.8
206138_s_at	907	1542.8	1510.3	1618.5	1298.5	1032.9	1314.9	1385	1370.4	1452.8	934.3	1322.4	1019.4	1578.7	1351.4	1377.9	1739.3	1493.4	1696.8	1755.7	1592.2	1019.5	1343.8	1360.9	1849.9	1715.2	2896.4	1123.3	1762.8	1628.2	1430.5
206147_x_at	411.9	622.9	496.9	533.1	604.4	412.5	438.1	575.1	500.5	716.9	962.7	601.2	624.9	402.5	1019.9	866.1	454.1	493.6	449.6	609.6	995.4	748.4	458.6	504.9	523.4	500.7	648.9	638.2	682	734.4	821.3
206156_at	18.5	15.2	7.9	14	11.6	10.8	23.8	18.6	17.6	14.3	31.8	13.6	23.3	10.7	11.1	14.4	21.9	15.4	14.1	15.6	19.1	10.3	20.3	34.4	42.4	7.7	31.2	19.7	25.2	26.3	24.6
206163_at	62.9	60.1	87.5	42	83.6	6.2	71.2	63.5	33	84.6	80.8	23.1	94.8	77.5	110.7	94.8	87.3	28.9	50.2	54.5	22.3	72.4	53.4	106.6	91.2	88.7	69.1	96.4	12.4	149.4	91.3
206191_at	938.2	798.9	1102.8	522.1	732.5	1100.5	683.9	724.5	432.2	773.1	587.8	930.2	670.8	309.7	366.7	854.6	537.9	544.4	560.3	1582.9	391.4	434.6	464	323.1	641	412.5	323.4	580.1	289.7	465.4	623.3
206202_at	3.8	1.7	3.1	9.9	2	2.8	5.3	1.4	5.2	7.2	17.3	1.6	4.8	5.2	18.3	7.2	15.8	2.7	5.1	8	3.8	2.8	3.7	2.1	24.3	6.5	6.3	94	11.5	36.2	21.1
206224_at	28.9	24.9	10.3	43.3	54.3	25.7	75.2	22.1	26.6	33.6	161.3	34.6	19.8	13	9.4	32.6	8.7	61.9	76.6	20	88.6	21.8	29.7	96.3	53.1	34.1	189.5	79.3	93.1	67.7	54.3
206232_s_at	189.9	96	177.2	126.7	126.7	253.8	181.9	176	76.4	94	132.7	73.3	131.4	9.7	56.8	128.3	21.2	71.6	25.3	85.7	97	113.7	98.4	19.2	84.9	87.6	26.2	29.2	28.5	21.5	64
206233_at	543.2	442.1	709.6	310.7	352.5	692.4	230.9	275.2	295.5	550.4	131.7	423.4	294.9	160.2	161.7	672.1	426.4	399.8	330.7	442	221.4	336.8	503	116.7	106.2	202.8	149.4	272.1	122.1	41.5	374.2
206240_s_at	222.2	256.4	238.9	315.3	214.9	297.4	387.3	211.9	229.5	338.3	651.7	304.1	319	341.3	367	257.1	407.8	270.2	440.7	402.7	212.7	317.6	295	237.9	506	311.1	666.8	379.2	592.2	524.8	382.9
206244_at	9.6	14.3	6.5	56.9	8.1	5.4	12.7	15.1	9.2	16.5	31	56.8	50.6	10.7	9.4	30.6	19	25.7	62.4	11.9	12.3	60.2	120.8	82.3	27.3	29.5	38.1	16.6	61.4	24.8	7.8
206250_x_at	11.8	7.2	14.5	14.6	16	16.9	15.3	19.3	13.7	20.1	31.4	11.1	15.4	88.6	12.4	19.8	23	14.5	19.7	12.4	7.8	9.7	13.4	17.8	31	9.5	24.9	106.1	17.9	33.1	23
206262_at	9.5	7.1	5.9	23.6	7	18.7	14.6	10.2	17.4	19.4	11.1	3.7	12.8	42.5	10.1	52.1	13	20.7	70.9	40.4	4.9	4.9	88.7	11.5	17.4	14.6	40.2	25.7	111.5	24.4	37.6
206278_at	12	12.3	19.1	26	16.1	48.3	110.9	10.6	35.9	146.2	88.1	16	65.2	60.5	110.4	78.9	236.3	96.7	82.6	78.9	122.2	73.1	73.8	38.2	123.7	59.8	181.5	212	141.2	149.5	64
206282_at	663.8	817.2	207.2	586.3	727.3	838.6	434	602.8	781.6	220.5	437.6	945.9	818.3	459.4	499.8	440.8	172.9	590.1	317.7	368.5	410.1	254.2	353.3	205.3	355.7	687.3	97.7	407.1	268.4	215	422.3
206290_s_at	4963.2	4390.2	3441.7	3206.9	3860.2	4969.6	3146.4	2602.5	2356	2988.6	2672.9	4640.4	3145.4	1494.3	2986.5	2717.6	2886.6	3639.2	3369.6	3968	1767.1	1873.9	1279.1	881.3	2743.3	1470.3	877.4	3133	957	1302.3	1971.8
206343_s_at	197.5	183.8	224.5	99	135.4	187.9	67.9	121.2	32.1	179.2	242.7	182.8	78.4	151.4	72.1	350.4	97.5	176.1	33.6	252.3	80	104.3	16.4	18.9	17.5	17.4	44	21.6	78.6	33.3	47.4
206354_at	17.1	8.2	57.7	13.5	9.4	5.6	13.6	15.3	17.5	33.4	28.1	10.7	9.9	18	24.1	6.5	6.3	3.4	33.4	9.8	68.9	68.7	39	42.1	41.8	7.5	92.4	25.9	20	46.3	26.9
206384_at	1391.4	2152.9	1565.3	1328.3	2061.2	3151.3	854.5	694.1	976.9	510.9	837.5	3620.4	1183.3	1225.8	921.8	1622.3	919.2	1413.4	1161.6	1094	1041.6	616	660.2	204.5	676.2	389.4	41.6	730.1	342.2	360.4	233.8
206388_at	111.6	127.6	131.1	149.8	138.6	145.9	169.3	89.9	411.3	122.4	191.7	83.5	107.1	119.7	176.9	182.9	258.2	138.7	231.1	182.8	47.8	107	118	234.3	165.3	154.5	367.1	177.8	234.7	370	167.1
206420_at	65.1	89	49.2	88.5	54.6	95.1	89.4	40.8	119	113.1	107.5	58.1	76.8	108.5	80.6	91.2	105.4	62.2	74.2	59.5	51.6	69.4	117.2	158.7	148.9	66.5	148.9	142.1	93.8	138.3	165.8
206435_at	983.7	1047	378.3	667	599.8	612.9	551.7	432	552.7	575.2	777.5	619.4	420.4	329	404.6	380.8	576.4	574.9	378.3	479.9	333.3	310.3	410.7	195.5	375	301.4	449.4	406.5	381.5	457.5	343.5
206461_x_at	5093.6	10055.6	4477.7	7385.3	8898.5	5278.2	7164.6	8860.8	9414.3	11168.4	7204.4	8714.1	10297.7	6408.2	7955	8254.9	5037.4	7333.7	11084.6	6318.8	11575	8264.6	7650.9	11839	12377.1	11784.8	5276	15424.6	10319.9	10341.5	7192.8
206464_at	21.4	25	21.4	29.5	34.3	22.4	31.3	26.8	41.2	55.3	73.7	26.5	30.3	31.5	32.5	37.4	44.4	30.1	17.4	34.1	30.3	27.9	30.3	17.4	41	26.3	39.4	50.5	43	64.7	126.5
206471_s_at	51.2	28.5	46	18.8	57.6	63.7	59.4	57.2	82.9	30.8	174.3	51.6	78.2	86.4	97.3	167.4	128.3	88.9	88.1	60.5	77.3	48.5	112.6	50.5	120.7	84	155.6	18	83.2	232.1	74.4
206481_s_at	3270.6	1321.8	3336.6	779.5	1725.8	2504.4	848.2	878.2	993.6	1183.5	541.7	2190.1	1200	968.9	940.8	1674.3	814.1	1280.6	747.3	2139.3	786.9	695.7	953.1	297.1	576.8	646.1	337.2	851.5	243.4	376.9	886.1
206482_at	8.2	5.4	13.1	5	16.2	6.4	60.8	11.1	5.5	10.7	30.2	23.2	2.6	68.1	11.3	5.9	27.7	29.2	7	25.6	13	36.6	9.5	9.4	75.2	6.6	26.3	27.3	84.9	18.3	24.7
206498_at	217.3	128	255.4	27.5	120.9	121.6	218.7	73.9	255.9	174.2	173.4	58	127.8	102.8	53.6	210.7	92.8	80.8	38.6	217.4	26.2	90.6	43.6	23.1	81.5	15.6	52	64.4	97.2	87.9	87.1
206507_at	72.1	215.4	189.9	109.8	100.5	137.3	170.8	107.8	106	199.7	111.8	137.3	157.1	178.5	156.5	83.5	243.7	152.3	87.9	142.5	188.8	147.8	246.9	116.6	254.3	174.7	196.1	201.1	177.2	321.2	151.7
206526_at	10.2	19.1	11.8	18.7	7.3	5.5	10.9	19.8	7.7	4.4	14.7	7	8.8	5.3	13.5	16.7	7.4	13.9	14.5	13.8	8.1	23.3	8.6	7.6	16.9	19.5	114.3	24.7	37.7	23.4	14.2
206552_s_at	2080.9	1227.1	695.1	784.6	1165.6	1603.1	744.6	993	416.5	275.1	177	1645.3	863.3	408.5	269.6	597.3	1504.2	704	485.6	551	111	412.8	211.9	137.9	647.5	201.1	167.6	521.7	156.9	135.6	2405.2
206569_at	6.4	9.5	6.4	6.6	10.1	6.6	10.1	6.1	11.2	16.8	17.1	6.5	10.8	15.7	10.2	9.5	33.2	17.1	11.8	7.4	8.2	6	7.9	13.6	11.6	17.1	78.9	11.2	19.4	15.4	20
206617_s_at	48	46.1	28	42.9	30.9	36.2	34.4	41.8	32.3	109.8	60	36.5	56.3	32.3	69.6	41.5	60.3	55.3	50.4	19.9	26.5	87.7	26.8	38	70.8	36.9	29.9	65.4	68.5	101.8	70.7
206620_at	13.2	11.1	15.5	12.5	38	10	9.7	10.8	12.2	85.4	36.5	10.5	11.7	10	9.4	84.4	45.5	16	17.7	10.6	26.6	13.6	33.9	70.9	29.8	16.8	56.1	37	54.4	22.4	84
206622_at	42	35.9	28	31.7	31	28.5	34.5	40.4	36.5	39.9	73.7	18.8	31.8	28.9	116.1	33.6	54.8	16.9	24.5	15.4	32.2	31	34.4	24.8	47.9	40.8	70.7	299.2	230.5	54.9	88.2
206624_at	215.2	139.7	32.8	133.4	27	26.3	216.4	205.2	269.4	4.8	17.1	28.1	212.1	42.2	270.8	7.7	32.8	65.4	15.5	11.5	7	169	2.2	108.3	48.8	28.2	18.3	16.2	31.8	30.2	4.3
206664_at	2.3	2.4	3.7	1.9	1.1	4.5	4.2	3.1	17	45.8	10	17.6	16.9	4	25.4	3.9	6.5	3.3	5.1	2.1	6.1	3.5	54.3	70.7	22.3	1.4	101.9	6.7	13	57.1	18.1
206690_at	873.8	547.2	864	585.1	724.5	576.3	415.3	562.7	319.8	377.4	128.2	757.8	308.4	455.3	347.6	1013.6	673.2	839.6	586.1	1309.1	270.7	169.2	250.9	368	90.6	279.8	665	330.6	81.2	66.4	369
206692_at	243.9	147.6	245.9	188.7	257.8	296.9	324.2	261.7	215.5	169.4	256.1	169.5	274	300.4	268.3	277.3	214.4	178.9	40.3	229	154.3	248.5	211.2	407	337.2	291.1	542.5	271.3	284.9	394.4	263.5
206716_at	9.7	11.9	15.5	22.3	57.5	11.4	38.2	11.3	54	89	111	16.9	42.3	27.8	88.9	27.9	30.8	21	25.5	48.5	65.6	23.4	127.5	81.4	44	42.5	56.5	45.9	101.2	33.9	24.5
206749_at	16	16.8	14.4	13	16.3	25.5	19.5	8.4	12.9	24.2	32.2	16.9	22.4	13.1	11.7	15.7	28.2	13.8	16.4	21.7	11.6	10	25	17.7	18.3	22.3	27.7	30.1	21.5	45.3	109.9
206762_at	20.7	14.8	22.7	227.6	22.1	74.1	69.4	32	54	32.4	20.9	68.9	97.7	15	96.1	32.9	259	60.5	39.2	93.4	128.6	86.9	16.3	22.9	173.7	100.5	220.2	197.1	34.4	104.8	86.9
206786_at	6.9	4.7	6.6	2.5	2.8	2.8	7.2	9.3	3.1	5.7	6.1	2.7	6	10.1	6.8	5.1	4.5	4.3	38.8	3.6	6.6	4.8	5.6	4.5	13.7	9.9	15.9	17.8	13.3	16.8	6
206798_x_at	135.8	99.9	125.6	183.5	119.1	191.1	44	203.9	140.9	203.5	177.1	182.6	232.5	148.1	47.1	96.8	304.8	240.3	58.7	148.9	117.3	289.4	120.7	206.3	159.4	302.8	183.8	207.2	508.1	193.1	159.2
206799_at	9.8	8.7	8.7	24.7	17.5	18.1	26.5	16.4	119.3	19.7	36	20.8	29	25.4	16.5	14.6	30.1	14.5	19.5	17.7	14.4	122.5	15.8	15.2	25.1	78.5	25.7	123.6	54.4	48.2	236.4
206802_at	43.9	59.8	28.4	29.5	35.7	68.5	39	40.2	41.6	105.4	66.4	30.6	106.5	141.6	34.7	40.9	85.5	67.7	34	21.4	131.9	39.6	40.5	94.8	131.8	31.7	221.6	94.6	47.6	91.4	96.6
206809_s_at	593.9	272	620.2	434.7	518.4	488.7	152	745.8	325.4	237.3	142.5	512.6	377.5	379.6	190.4	301.2	77.7	366.1	218.1	517.7	434.4	504.2	340.1	438.1	34.8	253.4	152.2	237.8	264	256.1	356.2
206831_s_at	13.7	12.1	4.8	4.2	9.8	12.2	11	8.7	18.5	14.8	13	6.2	8.7	9.1	8.7	5.9	11.3	8.3	96.2	9.3	17.1	6.4	14.3	20.1	15.7	8.7	16.8	15.2	16.5	18	76.9
206833_s_at	1558.7	1021.1	1175.8	646.2	1011.6	1057.4	1037.5	927.7	888.1	895.9	622.3	869.4	874.9	953.3	840.7	1026.7	364.5	669.4	657.2	916.1	793.1	1052.6	743.9	952.7	879.7	819.1	661	753.9	641.4	920.4	965.9
206838_at	35.2	185.9	16.5	158.3	16.4	37.8	32	24.8	47.5	158.7	80.9	70.9	25	139.6	23.5	140	206	24.7	118.5	71.9	26.3	59.4	46.6	33.5	140.4	170.3	108.9	45.4	170.5	57.3	82.7
206840_at	86.4	91.3	65.7	100.7	43.8	99.7	280.4	80.7	217.4	155.9	207.5	69.3	95.4	96.6	115.3	90.4	142	104.7	99.9	118.9	132.9	93.5	94.2	56	150.5	110.5	265.7	216.4	179.8	218.3	111.1
206842_at	41.9	34.4	21	14.8	22.7	18.3	43.8	31.3	37.2	17.2	61.4	13.1	22.7	18.8	34.2	54.7	29.4	21.1	82.7	28.3	28.2	40.1	20.6	29.4	53.6	73.5	56.2	46.3	47.7	49.3	30
206861_s_at	696.1	531.1	579	784	774.4	697	984	781	898.1	802.3	1689.5	482.3	642.4	616.3	669.9	972.9	954.3	676.6	516.3	834.3	712.6	873.1	975.6	1386.5	1271.1	1142	1877.9	1195	1070.5	1588.4	607.9
206895_at	12.4	9.4	3.4	33.3	11.2	16	21.7	27.5	16.6	109.7	36.7	10.7	14	12.2	12.1	91.2	22.7	27.6	17.9	14.4	20.1	44	85.1	11.3	71.7	4.4	38.4	68.4	37.9	16.1	38.4
206909_at	9.4	2.2	49.3	8.1	4.8	5.5	14.9	109.2	9.4	5.8	35.2	68.6	21.6	15.7	60	25.6	5.4	25.9	30.5	12.6	14.5	59.7	67.9	51.7	10.4	40.9	29.7	45.5	59.9	16.5	29.4
206910_x_at	193.8	119.1	91.2	133.1	143.4	123.7	276	152.2	242.8	204.7	364.3	200.7	166.3	203.1	214.1	212.4	108	136.5	200.9	193	206.7	179.8	228.8	349.4	232.7	320.7	222.8	307.1	199.4	214.5	195.3
206980_s_at	13	8.5	12.2	9.9	9.9	8.6	11.5	13	14.4	22.3	14	4.9	12.4	10.1	8.7	22.1	30.3	17.1	7.3	11	10.4	24	4.9	22.5	7.7	24.5	18.7	9.6	20.3	17	16.4
207016_s_at	152	101.2	250.4	156.7	173.1	265.8	241.1	356	555.8	220	108.6	194.8	466.6	194	113	113.5	237.2	521.5	196.2	180	656.8	582.1	556.5	271.5	343.4	859.5	468.6	1275.7	410.9	321.2	303
207019_s_at	12	19.5	9.5	19	94.4	10.9	24.5	12.1	23.4	12.9	19.7	16.8	88.9	17	10.3	29.8	25.5	33.8	82.4	10.5	23.2	30.6	22.5	13.4	48.7	32.4	134.6	25	30.1	15.5	24.6
207021_at	105.9	20.2	69.8	14.1	13.8	15.9	143.2	14.7	22.5	23.7	152	10.9	90.4	16.3	74.4	25.3	82.4	36.4	101.9	40.1	27	86.7	20.4	41.7	46.7	50.8	42.7	34.4	111.3	34.2	62.6
207046_at	42.7	138.8	27.3	52.4	22.6	32.1	139.2	79.2	22.3	49.9	48.9	35.6	66.6	65.9	24.3	81.1	49.8	99.4	97.4	8.7	11.1	42.3	102.2	9.7	159.2	64.9	70.8	79	100.1	120.9	64
207070_at	173	136.3	213.3	207.3	121.2	23	24.8	196.7	214.1	148.6	60.4	58.2	114.4	80.8	33.4	140.6	188.6	164.3	295	155	103.1	297.5	142	239.8	380.9	226.8	340.7	18	302.5	280.9	88.3
207078_at	103.6	301.1	150.4	166.6	128	120.1	85.1	80	105.9	185.4	108.4	263.5	89.2	180.6	181.3	59.4	133.8	253.8	109.8	239.5	97.6	151	175.4	100.5	159.3	159.8	213	180.1	135.8	246.9	185.9
207103_at	1022.4	865.1	529.7	343.2	524	771	449	414.5	475.6	560.7	235.1	630.1	436.9	357.2	369.8	747.5	263.2	436.3	393.3	533.9	265.5	229.2	351.9	199.1	475.2	385.3	192.7	436.5	158.6	176.3	284.1
207115_x_at	29	31.7	65.5	131.6	53.8	66.3	45	17.4	44.3	57.6	219.9	53.2	45.9	61.9	109.3	26.6	53.7	46.1	92.3	70.5	71.8	61.4	140.1	134.4	117.8	76.3	156.1	180.5	163.3	143.4	42.5
207147_at	124.9	21.3	130.5	81.7	92	98.6	80.1	51.9	192.5	85.7	134.4	103.8	63.4	11.8	10.3	124	63.1	88.4	103.3	176.1	65.7	20.4	26.6	54.2	10	10.5	138.3	19.4	36.3	22.3	49.3
207170_s_at	1216.1	1037	1366.2	881.8	1127.9	1352	970.1	983.3	1029.9	824.7	1095.9	1338.2	1285.1	1221.1	995.1	796.7	979.5	1145.6	710.2	1196.2	678.5	1105.4	823.5	712.4	742.9	657.3	891.3	756.6	800.5	632.3	1405.5
207172_s_at	319.4	131.7	232.8	176	234.4	298.1	232.9	345.3	265.4	51.2	135.8	354.6	322.6	135.5	326.3	197.7	42.7	164.8	181.7	211.2	131.3	172.3	162.3	123.3	143	210.3	81.8	226.1	121.9	66	224.6
207174_at	228	373.8	300.7	200	300.8	282.4	331	223.4	294.7	96.1	538.8	481.7	328.2	201.3	327	303.1	222	245.3	309.9	276.9	416.6	345.8	54.5	279.1	252.9	79.1	156.3	238.7	233.9	186.5	153.1
207194_s_at	33.4	42.4	61.3	49.6	48.9	24.5	39.2	57.4	60.9	60.1	48.1	54	41.4	115.5	90.5	40.8	188.3	65	136.6	29.3	20.4	107.8	20.8	119.3	146.4	79	146	19.7	81.7	74.8	7.5
207215_at	31.9	30.8	20.8	28.3	16.3	25.2	30	21.7	78.8	29.5	41	17	28.5	28.9	39.2	32	73.2	31.9	30.9	69.3	32.7	31.9	24	65	85.6	46.2	52.7	29.7	69.3	55.4	33.2
207218_at	62.3	80	56.6	7.7	52.6	33.8	13.2	94.4	118.1	38.4	224.4	52.3	77.4	31	194	89.9	73.7	75.4	102.6	43.8	119.1	117.6	126.9	68.5	182.7	92.1	96.6	163.5	132.6	132.5	72.1
207222_at	106.1	133.7	95.4	104.1	168.1	149.3	220.2	99.2	57.7	250.3	105.6	101.6	55.7	70.1	31.4	225.6	97.2	56.8	34.9	98.5	72.8	139.3	127.1	76.7	233.8	104.7	259.3	319.4	198.4	242.8	183.5
207225_at	4.5	22.5	26	9.7	5.3	31.1	12.8	14.3	13.4	32.6	54.6	14.5	7.4	15.7	6	15.6	36.8	4.3	13.3	18.9	13.2	8.4	18.3	9.5	34.7	26.7	46.3	32.5	15.8	21.6	15.4
207229_at	45.9	20.7	41.9	41.2	53.8	21.1	40.3	41.8	6	44.3	39.6	45.2	63.1	5.4	53.7	61.4	35.7	13.9	48.1	34.4	36.9	84.4	10.3	89.7	3.5	34.4	22.2	3.7	39.7	6.9	38.7
207305_s_at	1525.9	1392.5	1203.9	1179.6	1099.1	1146.8	1233.1	1099.9	1376	1224.7	815.4	1327.7	1472.4	1405	1371.9	1102.1	949.4	1170.4	1411.4	1218.7	1262.7	1231.1	1354.2	1108.4	1341.3	1046.5	1054.6	1288.3	1091.9	1086.1	1070
207330_at	291.9	131.3	126.8	194.5	244.5	187.6	343.7	340.6	186.1	359.5	583	161.4	326.3	155.5	330.3	381.6	423.3	209.7	218	211.1	197.6	200.8	224.9	341.2	548.2	190.1	549.4	354.1	452.6	638.1	406.3
207391_s_at	744.9	577.2	796.3	844.4	615.4	969.6	1264.8	534.5	706.3	875	1496.5	1005.9	919.9	772.7	666.1	661.3	1300.3	695.9	795.3	938.7	1079.5	599.9	664.8	491.7	1250	1385.5	1450.9	1061.3	1215.4	1859.8	625.2
207408_at	245.4	393.7	281.3	395.1	352.3	266	471.4	401.1	342.2	410.7	1241.7	353.3	396.6	291.1	313.1	258.6	317	377.5	243.4	273.8	458.9	456.3	443.2	349.1	424.2	411	812.4	518.3	639.4	530.3	207.4
207454_at	7.5	10.1	11.6	10.5	14.3	10.7	15.7	8.7	15.9	25.2	16.5	12.8	16	8	7.7	10.2	22	17.7	11.3	13.7	15.5	31.5	38.1	10.3	25.3	6.4	77	16.3	23.4	24.8	16.5
207478_at	47.5	57.3	42.1	148.9	90.2	60.9	92.6	63.6	70	47.8	52.6	58	101.7	76.3	85.7	204.3	131.1	128.9	107.8	190.9	15.6	18.7	53.9	61.6	135.9	86.6	224.1	168.7	84.3	238.1	125.8
207500_at	27.6	17.9	15	69.2	8.4	17.6	9.9	85.7	21.8	47.7	49.4	46	45	11.9	74.5	31	94.9	12.3	12.6	119.8	47.6	56.1	23.4	74.9	33	39	96.8	23.8	127.1	25.1	65.4
207536_s_at	151.6	83.7	94.3	219.3	117.7	107.8	139.6	103.6	128.6	201.4	303.5	136.4	100.3	141.7	125.8	202.9	171.5	155.7	124.8	146.2	132.3	165.2	124.5	238.2	261.3	163.8	456.6	275.7	224.3	182.9	111
207540_s_at	26.9	5.7	16.6	126	21.1	21.9	21.5	27.8	10.7	31.2	36.6	17.7	36.8	26.5	28.4	21.8	25.2	27.2	23.3	13.4	36.9	14.2	31.1	20.2	88.7	28.5	39.3	36.8	37.3	39.7	20.2
207554_x_at	222.2	213.5	116	167.9	127.8	130.2	120.4	159	277.7	123.1	270.6	176.2	173.1	187.9	248.5	243.6	216.2	136.4	152.6	245	231.1	188.9	119.9	76	441	207.3	220	293.9	199.4	376.7	248.1
207560_at	69	132.3	123.9	178.1	204.7	37.6	343	228.1	166.6	266.7	426.1	109.2	324.6	161.3	136.7	171	299.8	153.7	140.1	101.7	186.2	143.6	223.6	210.9	352.7	240.5	467.6	274.7	275.5	456	121.3
207597_at	26.3	37.1	11.2	39.9	14.8	34.5	183.4	64.7	17.5	67.8	238	18.9	46	30.7	55.2	20	51.1	30.7	71.3	88.1	97.5	23.1	25.8	76.3	145.1	99.1	189.9	191.4	138.5	104	17.6
207600_at	165.4	150.5	51.4	62.1	102.2	83.6	206.3	95.9	46.2	121.4	286.5	57.3	103	40	162	214.2	196	236.9	78.8	135.5	87.9	158.1	33.5	264.6	244.9	33.5	213.9	357.6	232.3	58.1	223.3
207610_s_at	54.8	48.4	44.4	88.2	111.8	66.4	69.8	113.8	21.5	89.4	177.5	46.8	125.5	45.5	70.3	87.5	108.9	9.6	130	56.2	75.2	27.5	159.9	125.2	71.3	72.7	189	152.2	189.8	86.8	128
207668_x_at	818.5	418.9	1179.5	773.9	1695.4	819.1	1112	1136.1	813.6	600.9	406	845.4	931.7	1122	562.9	730.8	618.8	876.8	758.6	405.8	1018.5	1032.1	1152.4	974.1	748.4	2091.9	432.5	702.1	637.9	531.9	678.3
207710_at	22.9	43.9	25.9	13.2	10.3	13.6	54	13.7	19.4	53.1	23.9	16.7	9.1	34.2	57.3	13.8	4.5	18.4	43.7	35.3	26.1	9	15.5	17.3	136	31.5	36	74.9	26.7	78.5	39
207743_at	15.8	26.2	17.5	26.5	36.3	45.5	16.9	25.3	65.9	34.4	173.8	25.7	16.8	29	36.6	35	27	28.4	28.2	16.8	33.4	30.3	32.5	43.8	43.6	43.3	189.8	138.8	30.7	31.2	36.7
207747_s_at	21.7	30.7	119.1	121.7	133.6	154.7	127	139.3	30.3	131.4	63.9	108.8	120.8	61.5	139.9	19.8	32.7	37.7	118	196.6	93.7	81.9	17	170.4	16.7	64.3	50.3	43.1	26.9	31.9	96.2
207749_s_at	302.9	307.8	335.3	419.2	564.1	299.7	618.5	333.9	341.9	446.6	611.1	320.4	410.8	670.1	328.4	468	572.1	368.3	423.4	404.6	363.2	374.5	560.7	654.1	713.8	377.8	893.6	651.5	614.3	672.1	400.5
207861_at	25	19.2	14.7	22.7	18.6	21.6	18.1	27.8	34.3	26.1	120.1	24.2	52	40.6	23.9	38.4	111.6	29.4	19.1	26.4	29.4	21.6	29.2	74.2	28.7	26	29.7	32.3	34.9	30.2	36.5
207876_s_at	266.5	192.5	194.7	336.5	263.7	260.7	444.5	379.4	325.1	81.6	563.7	245.7	246.7	429.2	755.4	218	657.8	426.6	567.6	239.2	361.2	665.8	477.8	498.5	346.5	751	975.4	279.9	592	609	475.1
207901_at	19.4	34.2	25.6	35.3	38.8	8.5	45.4	42.8	68.2	47.7	88.1	16.9	39.1	3.8	41.6	31.8	14.3	15.6	46.2	24.4	41.8	26.4	18.8	6.4	86.5	3	60.1	88.4	65.7	49	53.6
207907_at	5.6	9	4.6	7.5	10.6	5.4	9.9	20.3	21.7	12.1	25.8	4.7	5.6	5.2	10.7	16.3	16.3	5	37.4	7.1	7.7	17.5	29	18.3	14.7	23.1	45.3	11.5	13	15.6	18.6
207924_x_at	8.5	19.5	21.7	27.9	14.9	101.2	30.8	14.2	13	38.9	21.1	51.4	13	73.8	67.9	62.2	31.3	26.4	131.9	128.8	53.6	10.6	44.5	37.8	26.3	76.7	55.3	65.1	35.6	292.9	68.4
207939_x_at	761.5	922.5	903.7	269.4	499.3	530.8	271.8	364.6	506.5	984.6	226	762.4	61.5	385.4	536.5	354.2	541.8	739.6	390.2	622.4	377.2	471.4	488.8	470.5	41.4	452.3	72.9	453.8	464.6	384.9	420.6
207949_s_at	138.4	30.9	165.6	26.8	30.6	107.2	27.1	35.5	34.7	49.9	41.1	62.9	25.3	47.3	40.3	67.7	22.6	113.9	26	216.4	35.2	144.4	20.9	74.9	40.2	56.4	43.3	56.7	42.3	119.9	60.5
208016_s_at	16.5	60.4	17.8	87.7	24.9	52.5	34.5	34.1	149.3	105.7	190.2	63.9	55.6	89.4	47.3	83.8	139.9	101.5	95.9	51.1	42.6	50.3	126	115.5	90.5	63.6	142.2	220.1	106.5	140.1	105.7
208031_s_at	12	18.8	6.7	17.2	8.8	27.6	34.7	14.7	14.6	70.6	48.7	10.4	15.9	9.3	19.9	13.1	9.5	17.2	17.2	20.7	36.4	18.6	46.7	19.2	66.2	57.6	44.8	78.2	16.3	34.8	74.9
208035_at	237.5	197.7	354	313.4	252.9	265.8	302.9	503.1	323	306.1	261.8	234.7	304.2	259.7	413.3	359.8	386.8	216.9	168.1	347.2	266.3	221.2	289.6	392.4	586.8	305.6	520	581.1	373.1	632.2	445.8
208094_s_at	309.4	463.1	332	369	301	364.1	302.8	341	544.9	563.5	626.7	315.7	386.7	391	364.8	332.7	585.7	354.2	357.7	417.5	321.2	402	496	421.9	455	411.4	705.3	524.3	396.1	609.7	469.6
208096_s_at	184.4	212.3	462.6	293.1	213	297.4	456	353.3	497.7	460.8	171.2	251.6	609	300.5	426.1	214.2	314.4	506.6	223.9	291.6	679.4	786.1	228.9	283.8	425	932.7	252.9	806.1	580.3	522.6	687.6
208110_x_at	40.5	55.1	32.5	46.9	51.7	39.5	54.1	42.1	106	79.1	157.6	36.7	78.4	34.2	52.8	49.7	65.1	54.1	71.8	40.5	60.8	58	64.3	75	55.6	35.5	152.9	105.7	60.7	68.9	61.9
208112_x_at	297.2	594	303.8	465.8	235.9	144.2	290.7	192.1	186.2	429.1	339.4	283.1	268.2	477.6	303.2	337	546.9	610.9	464.3	293.1	503.5	418.3	346.5	439.3	491.4	455.7	871.6	640.5	659.3	717	429
208139_s_at	84.7	86.4	16.6	67.7	16.2	24	110.3	60.5	44.8	130.3	417.4	32.5	84.1	72.4	45	43.6	41.5	67.8	143.8	76.5	48.7	86.4	63.8	62.7	64.9	105.3	141	135.7	124.2	271.8	118.1
208140_s_at	68.7	121.3	164.6	67.1	141	169.5	100.1	94.5	63.4	123.8	287.7	107.2	354.9	116.5	182.4	225.1	354.2	173.8	180.3	142	179.9	233.5	150.6	14.1	209	125.6	48.9	221.1	616.2	308.4	170.1
208145_at	8.6	10.1	3	19.4	2.3	7.4	7.1	5.9	7.7	19.1	14	10.1	9.4	8.5	10.9	11.4	10.4	8.6	8.8	8.7	9.8	6	14.7	14.7	17.9	8.9	39.6	131.2	10.3	16.7	8.9
208185_x_at	80.1	153.9	80.5	84.9	131.2	89.9	76.4	81.7	53.2	158.7	269.1	75.2	40.2	67.5	79.6	168	110	112	16	101.6	163.8	90	98.9	278.5	239	107.7	178.7	170.2	107.8	90.2	90.1
208195_at	124	156.1	126.4	73.9	125.4	104.7	190.2	94.4	293.7	199.9	157.4	89.7	173.6	145.1	248.3	143.4	249	108	147.5	136.3	111.1	181.3	227.8	180.5	315.6	262.7	268.6	227.5	327.9	435	162.7
208215_x_at	11.4	21.6	22.9	25.4	7.6	12.1	14.8	10.2	11.4	16.5	13.6	8.2	6.5	13.8	12.9	7.7	10.1	8.5	6.9	6.8	10.3	14.3	13.6	18.7	34	29.8	39.5	18.6	49.1	51.6	53.5
208243_s_at	23	29.1	15	27.5	19.3	27.5	23.9	8.9	34.3	28.2	45.6	21.8	23.5	18.2	35.3	29.2	91	20.3	17.8	22.6	26.9	12	91.8	33.2	39.1	20.4	46.7	72.4	29.6	31.4	30.7
208254_at	13.6	16.9	10.7	12.7	14.1	13	20.7	15.8	8.6	39	62	11	15.8	8.3	16.6	21	16.2	18.3	13	13	12.5	12.7	36.8	14.4	26.3	62.4	22.9	9.2	18.4	32.1	23.9
208310_s_at	488.2	220.8	330.2	326.1	323.4	472.9	389.6	335.2	316.3	298.1	265.2	312.9	428	399.2	364.5	379.3	210.7	261.2	134.2	297	298.5	369.1	300.4	280.1	266.1	285.3	111.8	254.2	205.1	181.9	334.2
208318_s_at	7.6	8.2	5.3	8.1	7	8.4	10	6.7	8.7	11.5	19.3	7	5.8	8.2	10.3	13.1	6.6	9.2	9.7	8.7	11.4	11.1	7.4	11.7	15.1	8.9	19.4	9.4	10.9	36.7	22.8
208321_s_at	4196.5	1073	2170.4	846	1030.1	1603.5	670.8	759.6	1032.7	3321.7	716.1	1211.8	812.6	555.5	813.1	1239.7	831.3	1289.2	1101.6	1770.5	482	357.9	600.6	273.1	506.6	247.5	625.5	1130.5	200	938.8	375.5
208329_at	31	5.4	9.9	10.3	9.2	15.6	12.1	7.4	24.9	11.1	41.3	3.3	11.4	25.7	51.4	24	25.4	4.1	78.4	10.2	15.3	13.4	16.1	19.2	20.3	9.2	77.1	66.9	56.4	55.3	70.9
208342_x_at	17.6	18.9	10	12.2	17.4	11.2	10.7	9.2	21.1	22.1	39.2	12.1	14.3	17.7	16.5	16.4	20.3	16.9	19.8	18.1	16.6	9.3	20.7	17.2	38.9	11.1	35.5	31.3	19.7	31.1	21.1
208351_s_at	210.5	155.2	210.9	231.5	164.4	213	187.4	244.5	292.7	185.9	193.6	215.1	214.9	165.1	123.4	190.2	203.5	249.5	190.1	190.3	270.5	252.7	171.5	276.8	180.1	313.4	342.2	247.5	254.6	271.4	294.4
208352_x_at	171	296.9	202.4	227.3	183.7	160.9	337.2	197.5	203	149.1	23.5	121.2	150.3	87	75.5	172.1	223.5	126	124.7	243.7	88.2	122	96.8	152.7	337.8	13.6	88.3	110.1	16	41.8	135.5
208392_x_at	5.5	7.5	24.8	50.3	8.8	8.9	16.3	13.8	10.8	51	37.4	26.7	6.5	17.9	12.1	11.3	47.4	11.6	69.6	18	7.5	22.1	24.4	144.7	36.5	173	41.8	22.4	28.8	29.3	35.9
208397_x_at	26.3	104.8	31.9	10	27.4	42.2	9.8	11	72.7	11.1	27.6	8	13.6	43	39.8	10.7	76.8	44.1	58.4	37.6	16.8	34.2	20	23.5	111.1	36.7	539	92.8	55.8	63	120
208416_s_at	164.1	222.4	232.7	259.6	145	208.4	336.7	83.6	98.3	354.1	402.8	200.5	166.2	71.7	259.3	322.4	300.2	267.7	260.9	264.3	277.7	170.7	334.2	59.3	425.2	238.3	683.5	577	229.5	448	223.5
208434_at	8.3	5.3	8.5	15	14.1	15.8	12.9	8	17.5	13.4	41.3	5.9	12.9	7.1	13	10.2	18.3	11.1	9.5	8.8	9.3	5.3	8.2	9.2	24.8	6.5	20.6	11.2	60.9	20.6	47.3
208470_s_at	25.6	13.9	104.5	17.1	36.5	67.8	15.1	18.8	77.9	16	52.7	121.8	135	199.4	67.3	108.9	115.6	79	222.4	37.5	215.5	73.9	20.4	38.9	114.3	43.5	259.5	151.6	133.4	63.3	111.9
208492_at	82.4	44.8	63.9	28.8	54.5	14.6	11.7	12.5	35.9	16.7	28.5	7.6	18.7	15.6	8.2	14.2	7.9	12.4	3.6	16.8	9.9	7.3	18.4	30.1	17.6	12.6	19.3	11.7	11.6	21.9	8.8
208512_s_at	4.4	6.9	4.6	5.7	2.6	7.7	4.3	6.7	15.4	8.1	19	6.7	6.8	8.3	4.2	7.2	7.4	7.4	4.9	7.4	6.7	7.1	5.4	11.4	13.9	8.3	14.4	13.2	20.5	12	7.6
208532_x_at	54.7	70.6	32.5	90.3	65.1	70.5	80.2	84.9	99	79.2	162.5	47.5	96.2	60.4	89	83	105.5	86.8	76.3	100.5	86.7	62.3	80.9	112.1	93.7	93.6	120	110.1	121.4	102.5	74.6
208594_x_at	140.4	98.8	215.5	227	116.2	168	203.1	188.6	131.2	179.6	371.2	107.1	176.2	175.5	297	142	198.9	188.5	270.5	104.5	133.5	168.1	134.9	268	215.2	219.3	265.8	293.7	221.5	234	207.4
208633_s_at	363.7	391.5	959.4	1237.7	1270.1	1185.9	1212.2	1390.7	1455.3	443.8	1064.3	1015.5	1418.6	1416.9	1442.1	825.4	712.1	1197.1	1356.6	1198.3	1603.1	1328.9	995.6	1204	306.3	1114	298.7	425.2	846.8	473.6	782
208636_at	2282.6	2201.8	3092.5	1966.7	1740.3	2051.4	1663.6	1478.8	1773.1	2846.8	1528.2	2748.9	1555.8	1490.9	1738	1545.3	2313.8	1756.3	1756.7	3016.7	2540.6	1722.3	1377.9	1675.5	1570.2	1627.5	964.7	2527.4	1413.9	1630.2	1570.5
208644_at	739.1	520.3	1261.2	1410.4	1273.7	1192.9	1183.1	1191	1319.6	999.7	1092.3	892.6	1223.2	1447.4	972.2	1146.2	796.2	1056.1	837.1	972.9	1389.7	1299.3	1282.8	1098.4	876.8	998.5	723.8	856	1136	1156.1	1039.8
208647_at	2707.9	2355.6	3965.6	4055.3	2565.5	2384.2	3610.2	3583.2	2365.3	3494	1780.4	2044.4	2506.6	3850.5	2770.2	2727.4	3466.9	3193.9	3423.4	3522.4	4148.8	3679.6	4214.5	3897.4	4506	4985.8	2435.2	4155.8	4624.2	4065.9	3602
208652_at	4845.1	3381	3902.8	2400.6	3428.1	3307	2740.7	2565.9	1822.8	2967.8	1294.8	3040.7	2756.9	2459.9	2363.9	3028.4	2203.1	2770.7	2483	2687.4	2078.2	2215	1791.7	1815.4	1733.8	2494.5	516.2	2535.1	1347.4	1831.2	2425.6
208704_x_at	3124.4	4591.4	7007	4681.5	5395.7	6366.1	4731.7	4527.2	4194	3436.5	4085.9	5592.6	4156.2	4695	3891.6	4765.2	4504.1	4626.4	3890.9	5841.8	4660.3	4900.5	3482.8	3876.9	3153.2	4171	1774.7	3302.9	3784	3039.6	5051.1
208707_at	508.8	540.3	483.6	555.8	588.7	565.5	680.3	431.1	582.8	675.5	1135.8	469.3	570	466.6	512	713.2	548.7	454.5	805	527	701.8	570.1	759	820.8	780.8	655.1	840.2	575.5	607.1	680.9	727.2
208729_x_at	484.8	166.7	1400.8	1848	1217.3	1271.6	1296.2	2135	1058.7	464.1	652.3	871	1990.9	1051.3	1325.1	1298.7	578.9	994.9	623.7	719.5	1246.9	2178.4	1080.1	1396.8	470.9	955.8	92.2	348.8	597.3	956	1123.9
208747_s_at	183.7	253.5	400.5	454.6	469.1	350.2	571.6	660.5	636.8	378.9	245.6	375.4	626.9	360.9	621	360.5	1550.4	632.2	655.5	320.8	571.2	1518.2	652	440.2	653.2	1329.2	275.9	654.4	879.3	698.2	681.1
208806_at	529.8	707.4	1072.8	950.2	764.9	733.4	480.3	753.7	1056.4	540.6	642.6	808.5	804.6	575.3	533.8	1223.1	956	938.9	634.7	895.9	1130.7	711.1	691.7	589.2	599.8	424.2	585.3	579.9	344.1	133.3	431.2
208809_s_at	1495	2108.5	1373.8	2057.9	1522	1518.3	2021.5	1298.5	1441.4	1907.1	2046.5	1430.7	1498.1	1715.5	2201.3	1424.4	1991.5	1647.1	2098.8	1448.7	1890.6	2149.1	1991.3	1610.7	1846.4	2595.9	1904.4	1740	2095.2	2153.1	1931.1
208849_at	47.7	74.4	42.5	38.5	68.9	76.3	73.5	66.8	64.5	93.8	231.6	68.2	126.1	21.7	23.1	158.2	109.6	41.1	93.9	63.3	14.3	83.2	23.4	97.1	161	62.5	24.8	95.2	80.3	111.1	86.2
208865_at	2648.4	2797.7	3219.9	3552.2	3293.5	2171.7	2896.3	2902.3	3247.9	2835.3	2842.7	2926.9	2741.7	2899.9	3118.3	3060.9	3419.1	3293.1	4644.5	3830.8	3627.9	3325.9	3788.2	3342.1	5013.2	4280.8	2011	3710	4268.5	4776	2864.4
208891_at	1608.3	2048.5	519.1	1143	1209.4	1739.3	520.2	716.8	666.5	968.3	736.1	929.2	778	707.5	885.4	819.7	587.1	1318.5	1005.7	858.6	373.4	363.2	767.8	743.3	1160.5	402.6	238.4	780.3	374.1	514.8	478.6
208897_s_at	334.5	96.3	277.7	312	466.8	253.5	260.7	441.3	310.4	330.2	115	243.8	338	442.6	209.8	206.7	38.2	340.3	300.9	342.7	372.5	421.9	348.9	536.6	225.1	533.7	63.3	212.3	90.6	202.3	181.7
208898_at	4213.7	5230.6	4118.1	2587.6	3849.5	3925.4	3205.3	2807.4	2258.1	2828.4	1129.6	4056.8	2553.8	2325.4	1917.4	3413.9	1905.8	2879.1	2475.2	3395.1	2281	1946	1921	1055	2412.7	2723.2	797.7	2537	1281.3	1627.3	2436.1
208924_at	4417	4808.2	4525.8	2786	3091.6	4187.5	2447.5	3051.8	3914.2	3103.3	1977.7	4577.3	3273.6	3339.2	3540.5	3579.9	2345.6	3346.8	2426.2	3857.9	3435.4	3627.6	3324.4	2690.3	2586.5	2837	1490.6	3014.5	2017	2107.8	2588.8
208962_s_at	750.6	1000.9	1233.5	2577.7	776.4	1006.6	1508.5	1602.7	1527.7	1245.5	3630.7	1287.7	1470.5	2308.3	1687.3	1219.5	3050	1829.2	2184.3	1416.9	1194.7	2940.8	2136.1	1931.6	2051.5	903.4	3971.8	1802.4	3608.3	2322.7	2516.7
209020_at	405.8	308.1	372.5	368.9	383.5	387.8	450.1	416.1	437.3	296.7	334.9	354.8	386.4	495.9	403.4	337.3	300	390.5	323.8	542.2	488.4	397.2	411.6	497.6	322.9	568.2	490.1	328.1	450.5	452.8	615.6
209025_s_at	549.3	454.4	430	375.7	440.7	628.3	346.3	404.7	370.7	302.6	316	491.2	628.1	469.9	473.6	407	308.6	467.7	265.2	359.6	496.3	596.5	341	482.1	225.4	172	284.1	322.9	263.2	264.4	802.8
209039_x_at	516	780.1	748.9	856.9	680.5	553.6	669.4	931.5	1183.7	1016.1	860.5	540.9	753.8	1006.7	690	632	1072.4	966.8	543.6	771.2	1042.6	858.7	741.4	728.9	877.8	1065.6	1776.9	1649.9	1196.5	1422.1	809.8
209043_at	2727.8	3150.9	2406.4	2162.1	2864.6	3091.3	2171.2	2398.3	2018	1868.1	1789.1	2880.4	3285.1	2843.3	1937.2	2365.4	2056.8	2356.6	2411.2	1889.8	1729.8	2269.6	2371.3	1812.6	1986.1	1787.2	541.2	1972.5	1476.4	1570.1	2590.7
209059_s_at	513.3	672.3	781.2	630.1	675.5	987.8	462.6	680.3	538.9	273	343.2	953.2	511.6	824.1	601.8	541	771.8	821.4	628.2	684	606.3	1013.3	525.8	454.4	378	403.8	354.3	244.4	496.6	240.7	1314
209070_s_at	802.8	177.1	820.8	261.3	686.3	917.3	405.6	683.1	457.9	158.8	49.1	351.9	968.3	884.9	749.5	686.3	63.9	293.3	283.7	421.1	175.8	1077.6	540.8	903.7	138.8	243.9	44	239.5	80.7	95.5	408.4
209074_s_at	9062.1	12696.6	11633.9	13577.7	9114.8	8330.6	13050.6	12622.3	15061	11150.3	14246.8	12633.5	10288.6	10680.9	17482.7	9748.6	17297.6	12395.5	25234.9	16456.8	15617.7	16674.9	14979.5	19311.1	20157.2	14983.9	22038.8	14231.4	18278.1	16418.3	11344.6
209086_x_at	270.4	151.9	115	223.2	231.8	221.5	505.2	293	170.5	141.9	717.8	63.6	245.9	242.2	254.7	392.3	294.8	295.4	267	246.7	57.4	279.3	91	232.2	236.4	232.3	442.9	383.8	236.1	293.6	272
209092_s_at	842.9	730.1	1051.3	517.6	677.6	877	722.5	564.7	654.7	478.4	397.4	889.9	801.4	587.4	837	572.4	462.9	781.9	280.5	748.3	517.9	757.5	442.7	579.9	356.1	486.8	208.1	365	300.6	498.2	994.5
209108_at	403	397.2	409.1	645.9	373.2	514.1	745.4	696	548.3	560.1	419.2	462.6	1061.5	406	677	585.6	727.9	590.1	469.9	412.9	621.4	1047.6	348.6	705.7	676.4	1042.8	320.8	1132.5	1140.8	898.6	955.4
209115_at	1044.8	1013	1364.1	1134.8	1217.4	1142.1	1016.8	1130.6	1466.1	1209.7	445.9	1074.8	1637.9	1502.1	1512.8	1312.3	759.1	1088.2	828.6	1065.8	1335.3	1738.1	1578.1	1516.3	797.8	818.7	563.8	813.6	687.9	917.2	1561.6
209116_x_at	2867.2	200.7	2239.3	447.4	1884.3	4698.3	767.9	8121.8	3474.2	2246.9	1610.1	2310.6	6693.4	6182.9	6566	1016.1	1004.4	2107.7	732.2	2107.6	3397.3	1714.5	5150.6	11982.3	365.2	746.3	520.1	424.5	356.9	873.8	719.8
209129_at	268.7	322	290.9	369.7	315.3	299.3	381.2	373.3	447.9	269.5	908.4	158.5	300.4	378.6	630.3	400.3	702	489.5	530.9	331.5	524.6	679.8	318	357.3	492.6	521.3	617.9	464.6	733.7	541.3	541.9
209177_at	1330.3	867.6	820.5	820	817.7	863.9	1027.3	751.6	826.7	849.4	596.5	968.2	592.3	1026.2	840.6	810.4	793.9	858.4	882.7	720.5	711	916.8	892.3	537	585	669.3	806.6	715.2	516	977.5	743.8
209187_at	784.4	656.8	877.8	813.4	769.8	914.7	812.1	739.4	810.3	1063.8	447.8	830.5	914.1	616.7	614.5	862.7	404.5	670	851.4	657	883.1	933.5	849.4	777.3	713	917	360.7	693.8	500.6	608	649.5
209214_s_at	1088.5	1134	1216.9	1695.2	1092.5	1359.1	1313.8	918.9	1082.5	1345.9	829.8	1281.6	1564.3	1600.2	1329.9	1263.9	1290.3	1256.6	1297.1	1336.5	1410	1278.3	1558.8	1540.5	1345.4	1304.6	1786.1	1268	1514.8	1594.6	1446.7
209237_s_at	124.2	75.8	113.3	141.5	127.1	140.8	75.9	207.4	173.5	146.3	240.2	36.6	138.4	95.3	207.9	31.9	169.8	198.2	106.2	61.6	231.7	203.6	95.5	124.5	49.5	120.1	54.9	19.1	67.7	153.4	68.9
209242_at	7119.8	9580.8	8518.3	5446.5	7158.2	5643	4918.4	5354.5	5522.7	7422.6	3578.8	6618.6	5026.2	4864.5	4033.7	9171.9	6356.2	5768.4	6868	8445.9	5669.5	5207.8	6082.7	3349.2	5174	5073.4	2545.9	7564.2	3416.5	3569.7	4382
209274_s_at	1218.7	1045.2	1677.9	956.1	1144.9	1540.4	913.7	1244.8	1278	1357.8	381.5	1495.6	1672.2	1130.1	1063.8	1168	1023.6	982.2	877.1	1260.7	1506.5	1071.9	1131.5	1096.7	854.9	863.7	733.4	837.4	715.7	569.1	1156.9
209285_s_at	626.9	947.4	914.3	1074.6	977.9	557.3	1184.9	970.7	1008.3	1683.4	963.4	649.4	925.7	1346.5	1552.2	1002.6	1181.8	927.5	1299.9	1191.3	1380.2	1198.6	1581.8	2112.1	1505.1	1258.6	1121.4	1108.3	1713.5	1475.8	769.1
209299_x_at	13.2	18.4	37.7	19.7	14.4	38.4	30.8	18.4	21.1	18.9	37.6	13.6	21.9	17.5	57	19.6	22.8	18.3	198.4	19	17.7	92.9	21	26.2	68.3	30	32.4	115.6	22.2	26	42.3
209324_s_at	190.1	322.7	405.8	480.1	327.5	236.1	317.8	712.5	344	390.7	498.8	298.3	293.4	244.9	272.6	386.5	555.3	270	282.8	272.7	479	217	438.6	411.1	600.9	370	606.4	633.8	466.7	595.9	346.4
209345_s_at	778.2	1080.6	735	1029.7	633.6	742.9	710.9	677.2	665.1	808	998.4	931.4	590.9	654.7	963.6	899.1	924.9	847.3	1100.3	838.2	858.6	646.3	718.5	688	960.3	764.3	1126.4	977.1	847.2	894.7	821.5
209377_s_at	2979.2	3168.6	4177.7	3634.1	3381.7	3991.1	3962.1	3928	4333.7	5290.7	1571.2	2930.6	4668.8	3886.5	3010.1	4447.5	3388	3988.1	3410.3	4921.1	6238.7	6292	5712	5397.9	4814.4	4014.7	3674.1	4452.1	5332.3	4390.1	4820.2
209398_at	201.9	276.8	123.8	244.4	141.4	121.3	424.4	219.5	270.5	272.8	137.6	153.2	165.2	253.7	201	195.8	349	248.2	319.5	198.2	252.1	335.8	361.5	271.6	725.7	580.8	368.1	320.4	474.4	391.3	109.2
209414_at	109.4	267.2	171.5	103.5	75.1	126.7	95.2	123.9	109.3	153.7	345.8	155.4	131.7	167.7	171.7	191.1	199.2	128.1	189.7	195.8	224.2	112.7	215.4	148.9	142.2	155.4	243.5	292.1	177.6	137.4	207.8
209435_s_at	1774	1734.3	1768	2166.3	1947.9	1489.1	1959.5	1926.5	1371.7	2407.9	2405.5	1343.7	1869.1	2709	1983.8	2485.5	3131.9	2368.3	1449.1	1971.2	1729.5	1596.8	2553.2	2615	2344.3	1174	2929.8	2035.5	3516.8	2029.2	1979.5
209439_s_at	115.5	343.2	264.7	344.6	264.9	170.4	447.4	410.1	395	345	296.5	239.9	305.7	370.4	273.1	265	583.9	360.6	331.3	441.4	341.5	483.7	439.8	283.3	427.2	434.5	714.3	445.6	540.8	541.2	240.1
209443_at	31.4	30.8	28.5	93.4	34.4	36.5	57.5	61.7	64.1	38.5	74.8	31.5	264.4	27.7	61	36.6	61.5	48.9	38.4	36.4	198.3	37.6	22.2	228.8	319.1	369.2	47.8	390.6	41.5	173.2	142.1
209454_s_at	67.8	41.5	50.6	52.1	95.8	11.1	52.1	97.6	189	66.2	285.7	72	109.9	73.4	168.4	122.5	142.2	73.4	100.5	115.5	123.1	139.2	107.4	101.4	85.6	89.8	288.6	85.4	138.4	329.2	117.4
209460_at	2394	2115.2	3524	1505	2121	2908.4	1899.1	2608.3	1652.6	1805.1	1612.9	1784.9	2070.5	1612.8	1707.9	2597.5	1330.4	1731.8	2362.1	2991.8	2006.2	2741.4	2041.4	1150	1597.5	1517.9	646.8	1656.6	1370.8	1461.4	1781.1
209466_x_at	1412.9	1230.6	1939.6	1696	2165.1	2058.1	1879.5	2408.1	1510.8	1352.8	2600.1	1918.2	1686.5	1820.3	1978.9	1794.3	1109.3	2092.7	1364.7	1773.8	1523.8	2111	1116.3	641.5	1048.6	890.6	1609.2	1414.5	1460.9	1401.2	1481.3
209470_s_at	8184.8	9399.2	10282	4855.5	8255.6	10181.7	6255	6988.3	7917.9	7101.1	3936.8	11413.3	9794.7	5097	8969	6670.8	3853.4	7703.5	5059.7	7408	8776.5	10770.6	4813.4	4835.3	2625.8	6526.8	1341.3	6208.1	3599	4023.7	7777.5
209475_at	637	826.2	990.2	798.7	939.5	852.8	756.1	975.1	876.1	670.3	615	1084.1	1025.9	612.5	637.4	945.2	465.5	676	687.7	1035.2	899	647.3	781.7	675.7	559.7	943.8	591.7	640.1	702.2	589.7	656.8
209481_at	2226.6	1831.1	1408.8	1004.5	1340.7	1733.3	988.4	1314.3	1324.1	1250.7	495.5	1677.8	1784.3	1013.8	1144.9	1399.6	822.7	1242.3	960	1243	964	1262.1	874.9	999.3	951.4	1139.8	411.6	1204.3	857.5	783.4	1165.7
209496_at	314.6	95.2	137.8	372.2	316.4	337.7	183	433.4	342	297.4	509.2	150.1	432.3	302.6	343.6	199.8	497.5	436.6	407.8	299.2	337.7	510.4	257.2	567	222.4	522.6	407.1	535	666.2	679.1	669
209523_at	834.2	796.3	812.5	791.4	959.2	804.1	725.8	709.4	841.7	920.1	551.3	757.1	824.6	815.3	763.6	952.2	886.2	749.2	766.5	783.8	853	1030.3	1095.2	984.5	603.7	708.8	513	784.8	649.8	565.8	759.6
209524_at	2195.5	1999.5	2752.3	1490.3	1620.1	1661.8	1060.6	1215.6	1568.7	1518.7	889.6	1902.4	1604.6	1500.9	1693.4	2290.1	1328	1062.4	1042.1	1617.9	1631.6	1814	1795.7	1855.5	1165.9	1339.1	851.3	1526.6	1160.3	892.4	1506.5
209552_at	8.4	22.3	18	70.4	30.4	61.8	30.1	16.5	184.4	39.6	57.2	25.7	30	61.5	30.7	75.7	156.8	29.3	34.6	26.3	35.9	27.2	95	66.3	51.9	75.1	44.1	74.7	95.3	68.8	51.3
209574_s_at	323.6	317.5	194	345.9	332.9	299.1	415.3	359.8	335.6	306.3	321.9	295.6	420.6	669.7	410.5	226.3	348.3	284.2	250.2	310.6	272	347.9	587.6	291.6	459.6	216.3	510.1	283.4	490.1	857.5	532.7
209582_s_at	397.7	245.6	505.1	239.3	258.7	443.7	302.9	305.3	83.3	210.9	252.6	270.4	316.4	202.3	193.3	373.6	168.9	208	221.8	260.9	176.6	185.2	243.4	165.5	198	187.9	150.3	202.8	98.1	143.1	237.7
209585_s_at	298.9	365.1	370	341.7	361.8	285.8	303.5	264.7	281	275.5	215	317.4	365.3	370.4	239.1	303.7	197.4	307.8	297.1	345.1	332.5	350.7	411.2	268.4	264.2	407.1	131.4	318.5	247.1	244.9	191.8
209603_at	5.3	13.8	12.6	8.6	8	5.8	7.7	18.1	11	81.3	51.7	2.5	15.8	55	38.2	17.2	12.9	7.5	78	56.1	10	7.5	10.8	16.5	17.8	62.9	32.9	21.9	84	27.5	12.7
209611_s_at	200.1	62.9	230.5	189.3	236.1	251.3	198.7	299	185	157.1	77.3	139.3	213.7	126.4	270.2	207.4	128.5	145.6	38.1	127.2	124.6	190.1	122.3	154.2	191.2	181.6	76.5	163.9	99.9	149.2	172.4
209671_x_at	108.3	59.9	69.2	43.8	57.3	95.3	74.8	116.6	115.7	185	71.3	109.2	146	72.8	101.7	133.7	154.4	90.7	125.3	66.3	108.1	193.2	145.7	147.8	234.6	34	171.5	291.9	89.4	206.2	134.4
209672_s_at	34.2	40.5	88.8	28.8	28.5	43.9	57	48.7	115.6	51.8	155.1	50.1	73.1	26.4	59.5	53	59.8	66.7	46.6	28.2	95	100.7	78.5	66.5	89.6	64.8	102.2	147.1	110.4	68.8	65
209685_s_at	7262.6	11720.5	5579	6396.2	5051.7	5978.9	4253.1	3555.6	5106.1	4603.3	5693.5	7567.8	4690.7	3807.9	4817.3	4649.3	5132.4	5991.7	6212.8	4709.1	4826.4	2054.8	4406.2	3475.6	4891.5	1870.3	2684.8	6567.4	2454.1	2985.7	1531.6
209706_at	296.8	99	215.1	254	254.2	260.5	285.6	507.9	517.9	311.1	600	198.4	296.8	229.1	397.6	387.5	332.2	226.8	208	327	260.5	328.8	288.6	369.6	482.1	415.1	335.7	447	371.2	457.1	435.7
209716_at	180.9	310.5	352	319.6	559.5	338.6	496	377	902.5	396.6	1178.7	353.2	643.1	498.1	462.7	680.6	272.7	408.6	525	475.1	615	489.6	534.5	679.9	648	592.8	711.9	1072.2	479.7	1087.8	463.7
209726_at	1859.7	3085	2435.8	2625.9	2756.9	2997.4	1935.4	2021.1	2287.3	1971.8	5229.7	3325.9	2948.5	2119.4	1977.3	2114.5	2615.2	3625.5	2429.7	3019.6	3322.3	1557.5	3188.1	2711.5	1194.7	1298.2	1237.9	1944.6	1717.6	1458	1652.1
209757_s_at	151.3	88.5	157.8	141.4	124	99.3	77	61.2	251.4	155.9	33.3	149.6	218.3	125.4	149	79.8	122.9	155.5	105.9	144.9	201.3	197.9	353.7	235.2	185.5	164.8	141.5	146.5	206.9	188.2	223.6
209763_at	486	629.2	608.8	499.6	536.1	428.2	588.7	752.5	654.5	508.4	490.7	722.7	548.7	360.7	603	297.9	262.1	534.7	518.6	582.6	531.7	440.4	303	318.5	293.9	191.7	246.9	441.1	466.5	362.1	342.2
209777_s_at	60.9	282.4	57.7	95.4	74.3	61.4	85.7	87.2	126	61.7	155.6	165	174.8	68.4	197.3	90.9	99.8	305.6	242.2	99.9	101.2	172.8	67.6	209.6	160.6	107.7	240.5	326.5	348.6	177.1	133
209804_at	240.2	75.7	245.2	236.4	231.7	220.4	20.3	57.8	134.4	34.4	98.1	158.3	121.5	208.5	156.8	57.7	44.7	253.6	324.6	162.7	90.7	144.2	141.6	37.7	35.1	38	33.7	43.8	36.5	52.7	199.1
209829_at	811.6	1624.9	712.2	491.5	640.7	883.2	538.2	497.1	593.5	462.3	391.1	1047.8	695.3	440.1	785.5	647.6	509.7	579.6	632.7	810.9	432.2	403.7	588.2	285.6	500.9	326.9	171.1	518.4	457	192	332
209840_s_at	501.8	571.3	648	397.5	364.2	452.5	524.9	373.1	312.6	646.1	388.6	489.7	460.8	370	419.9	775.8	292.8	476.8	517	573.1	446.2	563	397.9	421.1	438.7	271.1	260.7	582.4	255.2	305.8	286.5
209853_s_at	299	233.6	251	205.8	200.4	437.6	390.7	396	258	144.8	449.7	217.9	253.5	241.6	286	334.4	243	176.6	276.1	291.9	238.5	220.1	321.6	105	24.7	258.3	70.5	11	37.8	349.5	152.5
209865_at	82	145.3	71.4	85	43	65.9	104.4	105	70.6	131.2	138.9	192.5	8.6	139	191.7	156.5	181.6	127.3	172.1	89.2	174	133.7	85.9	155.6	197.9	89.8	145.7	202.6	140.6	137.7	177.6
209867_s_at	913.2	1022.5	750.5	405.9	470	803.3	675.8	725.6	705.9	658.1	349.2	958.9	802.7	475.6	588.8	596	254.6	773.7	426.8	1016.4	914.3	859.3	479.3	452.1	303.6	483.1	53.2	453.8	371.8	606.9	704.4
209877_at	64.4	101.5	792.6	743.4	587.3	830.7	430.2	487.5	464	96.9	722.5	634.4	301.6	570.1	325.3	844.5	392.3	1019.7	520.1	789.7	330.3	288.2	228.6	207	47.4	95.3	69.5	136.8	110.6	88.9	277.1
209897_s_at	700.5	1410.7	467.2	691.1	696.5	939.2	696.6	672.2	582.8	434.3	577.8	996	677.9	541.7	599.8	839.6	615.9	779.8	537.6	782.5	415.4	395.5	532.2	517.7	481.9	216.7	478.4	603.9	608.4	434	229.3
209898_x_at	997.1	1692.8	1475.9	1003.6	878.5	926.6	1032.6	856.1	1211.7	1323.5	859	1179.8	809	776.2	965.6	1236.2	1097.9	854.4	929.9	1670	748.1	1215.7	1105.3	1101.8	819.4	638.5	878.6	972.3	790.5	638.6	839.3
209902_at	193.9	230.7	243	214.9	32	182.4	140.9	109.3	104.5	173.8	94.7	213.5	116.9	174.6	30.5	190.2	32.4	109.7	31.8	246.3	35.3	27.9	41.4	91.2	29.3	108.6	17	28.2	23.3	122.1	22.1
209909_s_at	37.4	63	47.7	78.7	43.5	51.5	35.3	74	78.1	46.8	17.6	49.3	97.5	31.9	74.6	44.8	81.3	77.3	47.5	40.9	86.7	106	46	39	43.6	87.1	119.6	149.5	116.8	44.6	103.4
209913_x_at	147.9	243.5	173.1	148.3	145.7	113.7	173.8	46.8	74.2	214.8	240.6	149.8	179.7	96.8	286	77.2	215.7	179.1	131	208.3	191.3	219.8	109.9	160.5	369.1	279.5	392.4	59.4	212.7	298.4	213.2
209915_s_at	855	501.1	985.5	199	533.8	800.4	446.4	515.2	371.7	372.2	64.6	691.8	651.2	336.2	378.1	486.8	286.5	328.6	108.8	399.8	345.8	396.7	295.2	42.9	51.9	306.2	74.5	256.7	38.6	232.7	334.5
209921_at	668.6	347.6	521.3	727	631.7	747.4	646.3	675.4	770.2	757.2	387.7	379.4	1120.7	547	829.7	433.3	527.4	1145.2	467.1	793.4	921.4	2433.1	580.4	692.2	761.9	3324.5	520.4	984.6	847.9	986.2	826.4
209989_at	133.6	149.5	115	116.4	73.6	128	184.9	146.1	277.8	123.7	391	148.5	124.7	81.7	239.9	44.2	151	142.6	234.4	254.3	155.2	214.1	230.1	304.5	256.7	187.1	392.5	116.8	280.1	215.1	218.8
209990_s_at	5788.5	7665.1	7304.8	3572.9	4569.6	5538.9	3349.8	3998	3360.9	5462.2	2154.7	6127.4	4136.1	2779.7	2478.7	4984.8	3197.9	5448.3	3325.9	6786.2	4530	2267.4	2675	1063.6	2888.7	3400	1507.3	4785.6	1048	1541.1	2957.1
209994_s_at	204.7	13.1	197.8	186.5	179.9	147.3	130.5	261.6	172.3	21.7	26	145	120.1	178.2	249.3	248.6	21.1	127.6	197.2	86.5	108.7	218.4	213.2	138.8	38.7	174.1	12.7	18.3	116.3	16.2	64.8
209998_at	176.5	241	277.8	259	155.9	236.7	281.7	238.3	24.8	150.9	389.5	236.2	327.1	307.6	288.5	229.3	172.7	204.4	275.4	260.7	207.8	308.6	182.8	320.2	263.6	277.3	385.5	256	310.3	363.3	281.9
210008_s_at	112.2	92.9	93.7	19.5	15.3	31.5	33.6	11.2	12.1	34.7	21.8	38.2	7.2	11.4	36.2	42.5	56.7	13.4	9.9	125.1	31.7	19.2	30.4	66.2	106.9	108.7	165	140.1	124.1	31.2	162.3
210016_at	5954	5504.2	4708.4	3510.5	3815.7	4830.4	2792.2	4170.2	3481	3580.2	1658	5443.8	4437.8	2769.2	2267.5	3359.5	2322.8	3990.9	2299.5	4418.3	3126	1924.6	2379.3	1120.1	2568.6	2642	840.1	4549.5	752.1	1096.1	3121.1
210033_s_at	79.9	117.3	127.8	110.3	87.5	201.1	164.1	187	188.3	120	129.5	159.5	330.6	136.9	126.7	133.9	221.1	116.2	42.3	165.6	38	102.6	88.1	221	175.8	209.6	211.4	289.2	513.2	285.3	316.1
210040_at	5689.6	7333.2	5237.6	2800.3	3681	4610.2	2618.4	2013.3	2597	3572.9	1586.5	4484.2	3223.4	2111.5	2106.9	5321.9	2888.2	3955.7	2196	4461.9	1973.5	2524.3	2419.5	745.4	2457.4	2514.8	1095.8	3352.9	894.5	1313	1956.6
210069_at	149.1	301.1	215.4	291.9	184.1	100.3	256.3	311	233.6	211.7	256.4	94.4	156.1	227.9	167.9	283.9	294	283.9	418.7	280.3	192	233.3	514	192.6	375.2	339.9	682.5	275.6	530.8	316	161
210078_s_at	2509.6	4782.6	1039.9	1359.7	1313.4	2369.2	818.1	1159.6	838.3	678	741.8	2543.9	2203.1	1188.9	1562.2	1084.9	1086.8	1446.6	874.5	668.7	937.1	678	961.9	497.6	597.4	710	21.4	1233.9	693.5	473	1534.6
210117_at	98.8	156.5	123.3	88.1	124.8	100.6	104.3	70.2	296.4	89.2	221.1	82.4	172.5	94	183.7	160.6	165.7	91.2	141.9	176.7	146.7	159.5	80.6	173.2	245.7	257.7	131.9	199.7	238.6	258.2	175.5
210121_at	248.6	231.1	575.7	166.6	252.6	179.4	219.7	156.1	206.3	349.7	136	129.5	91.2	186.2	108.9	403	375	246.3	305.1	570.3	192.6	230.4	290.3	168.6	160.4	103.4	310.7	107.7	110.6	94.5	90.4
210149_s_at	7430.3	5410.3	4186.9	3019.3	2973.1	5741.6	2878.1	3123.3	2206.3	3702.6	790.7	4850	3855.8	4854	2436.6	4065	1409.8	3365.4	2085.4	3359.3	1856.6	3040.5	2181.6	2149	2802	2802.1	913.6	2861.4	1520.3	1856	4900.5
210162_s_at	180.1	262.6	182.5	321.3	244.5	163	288.5	258.7	132.8	346.5	380.2	153	243.3	252.6	218.6	151.7	266.9	232.9	402.7	135.4	250.7	255.4	202.5	246.2	480.1	450.2	569.9	217.4	390.1	371.1	242.2
210176_at	75.7	21.8	42.7	77.8	79.4	64.7	68.8	90.4	113.7	122.5	37.2	61.6	150	63.4	86.6	131.7	119.1	82	50.2	90.2	110.6	102	98.7	97	143.4	97.3	214.1	136.5	126	118.3	101.4
210194_at	1.4	1.9	3.2	3	1.3	1.2	23.1	5.4	2.1	2.8	16.4	2.6	2.9	1.3	2.4	10.9	7.5	3.6	14.4	2.1	4	8.6	1.3	74.8	9.1	4.7	145.2	10.2	13.3	10.5	4.7
210197_at	195.9	168	261.6	321.8	280.9	177.7	299.9	268.9	462.8	405.9	584.6	189.4	214.7	303.9	264.5	361.2	313.9	209.6	395.5	358.4	386.9	203.9	259.5	322	491.9	518.5	368.8	462.9	419.8	443.7	210.4
210200_at	172.7	186.9	225.8	164.2	164.4	285.7	249.4	240	250.4	287.4	539	263.8	227.6	207.4	355	268.2	318.7	241.4	216.1	245	222.1	184.6	308.6	190.4	173.7	316.1	407.1	349.2	389.8	542.3	299.6
210229_s_at	15.3	16	14.9	20.4	29.3	23	26.8	26.6	27.3	42	206.9	15.1	31.9	63.4	33.5	28.4	31.1	19.4	25.2	25.9	22.1	28.5	63.3	28.1	59.4	79	71.2	56.3	41.5	53.3	23.8
210244_at	16.5	21.3	14.7	22.2	19	14.1	57.3	46.8	23.3	21.3	66.6	15.3	31.3	15.9	43.2	38.8	28.6	27.8	26.2	11.8	20.5	19	19.3	59.3	50.7	27.5	86.1	34.2	28.2	82.2	31.5
210267_at	15.3	63	19.5	56.2	16.8	35.3	16.5	18.7	16.4	8.8	46.6	7.4	21.1	64.3	8.3	87.6	42.4	79.8	77.3	29.6	44.2	17.7	32.3	168.5	49.3	30.2	95.9	21.4	26.2	88.7	40.3
210268_at	17.3	76.8	130.9	132.8	63.6	41.1	58.9	46.5	118.8	75.7	206.3	73	70.8	80.4	104	175.7	240.6	69.3	237.6	123.4	87.9	113.9	161.8	109.9	186.1	89.7	248.6	86.4	215.1	106	102.3
210292_s_at	690.5	364.2	493.6	349.3	202.5	138.7	357	302.9	279.3	299.4	130	71.2	468.7	114.3	206.3	228.5	134.5	187.4	157.8	304	122.7	598.5	79.8	160.9	196.3	98.9	63.2	179.3	144.2	247.7	68.2
210300_at	58.3	109.2	52.8	130.2	39.9	99.3	94.8	46.2	97.4	27.2	108.4	49.7	115.5	113.2	184.8	204.9	129.4	86.1	130	197.4	87.1	109.2	36.3	123.4	193.6	94.4	161.4	83.5	180.5	226.5	163.2
210302_s_at	111.5	125.1	103.4	138.5	118.8	171.2	176.3	202.7	156.5	185.1	200.5	164.9	210.1	149.1	205.7	202.2	202.2	253.5	198.1	180.3	163.6	143.1	275.2	160.4	247.4	304.4	262.3	315.5	188	306.6	182.8
210313_at	43.6	20.4	27.7	312.3	158.7	14.9	156.7	11.5	42.6	103.6	300.9	128.8	153.8	135.4	248.7	210.8	166.3	130.2	176.9	35.5	212.6	163.9	188.2	47.2	165.2	54.7	71.8	209.6	362.5	149.4	126.7
210327_s_at	5.6	5.6	3.1	3.1	4.7	2.4	5	4.5	16	8.9	8.7	6.1	5.5	2.8	5.4	3.5	6.1	7.5	5.5	24.4	24.2	4.1	42.4	7.8	17.1	6.1	15.3	6.1	5.3	6.2	6.4
210344_at	8.7	5.3	5.6	6.2	6.8	5.7	4.3	6.1	8.8	10.3	9.2	6.3	8.1	5.2	7.5	10.1	8.3	5.2	10.5	6.2	7.9	5.9	18.1	9	8.4	6.9	14.2	6.9	8.3	8.3	8.3
210357_s_at	502.4	734.8	898	1266.2	658.8	865.2	919.7	1191.5	1103.6	1219.7	1502.2	1028.8	956.7	930.4	1040.7	1326.3	1399.3	1085.1	1496.6	1281.7	975.8	1260.2	852.7	1562.8	1090.4	1153.9	2159.3	1147.2	1986	1272.9	1271.6
210358_x_at	87.5	134	133.4	190.9	108.8	145.9	147.1	143.4	120.6	81.7	94.4	151.1	130.7	144.1	186.4	223.7	190.9	131.7	138.8	190.6	200	139.5	224.1	185.8	326.1	201.7	176.6	378	213.7	296.1	166.5
210360_s_at	101.8	92.4	95.4	87	89.2	94.1	101.6	171.2	111.4	56.2	96.6	45.7	48.9	136.3	89.2	132.2	56.8	88.3	112.5	89.4	80.6	68.9	94.3	156.1	167.2	116.4	160.3	299.4	154.8	167.8	65.8
210384_at	40	13.9	48.7	42.4	44.7	44.9	51.7	24.9	8.1	83.6	31.1	24.9	80.4	50.3	87	55.1	32.1	26.9	24.9	91.5	54.4	52.8	18.1	7.7	56.2	70.5	103.2	146.5	86.2	87.6	9.3
210389_x_at	128.6	95	133.7	137.2	118.5	112	302.3	214	154.8	216.3	278.5	129.5	143.2	202.4	200.1	182.5	314.1	126.5	192.6	169.1	174.7	206	257.9	248.9	272.3	237.4	331.6	190.5	265.9	211.3	171.9
210432_s_at	1110.2	1490.9	1823.6	960.9	1297.7	1256.8	1112.6	1180.5	1002.6	1401	440	1426.6	1059.8	804.5	584	942.4	522	1194.6	763.8	1646.3	1969.1	970.2	1080.9	574.6	528.5	954.6	176.7	1485	487.8	496.3	578.8
210469_at	113.2	82.9	143.5	105.4	36.4	85.5	206.3	111.4	80.5	129.1	23.4	114.9	83.5	47.5	65.7	70.5	225.1	161	167.7	251	178.6	101.4	36.1	268.8	286.4	152.9	301.4	292.5	166.3	216.3	85.2
210473_s_at	512.7	337.2	657.7	798.2	724.9	667.5	796.9	829.7	754.1	990.6	871.4	577.8	1052.1	610.1	1118.1	696.8	1061.8	816.5	1414.7	639.7	1277.9	1640.2	399.2	919	944.3	1711.3	774	948.1	1311.3	1393.6	752.9
210487_at	9.6	28.4	5.9	7.1	9.3	8.6	19.3	6.4	9	8.8	27	7.2	16.2	8.4	9.9	12.8	12.5	11.8	17.1	15.3	10.1	11.1	24.7	34.1	18.2	18.2	16.5	18.4	10	24.8	25.7
210501_x_at	2298.7	1950.5	1796.7	1751.5	1672.1	2956.5	1603.5	2471.3	1306.7	1343	990.9	2061.4	1973.5	2454.6	1961.9	1637	1329.1	2057.2	1371.7	1536.8	1356.6	1862.2	1655.6	1610	1253.7	1358.5	870.2	1361.6	1190.6	1470.1	2763.2
210511_s_at	5.8	28.2	8.5	9.4	6.5	6.7	9.6	54.3	12.3	6.7	18.8	24.4	100.3	7	35.3	19.8	121.5	49.7	44.2	8.1	137.1	6	61.9	23.9	56.6	102.1	28.7	369.1	56.7	12.1	62.8
210517_s_at	1460.6	1244.8	1021.4	779.9	1027.5	1241.8	1372.2	998.6	802.5	1257.1	1169.3	1186.7	1103.8	761.1	1030.7	1055	521	1251	865	1385.9	1173.1	839	1073.2	804.8	551.2	693.9	372.3	587.8	567	622.6	775.4
210524_x_at	2289.3	4234.1	1826.4	3654.6	3557.8	2687.2	3332	3913.5	4448.6	8458.1	3857.9	3131.3	4974	4389.2	3619.1	4757.7	1396.1	3134.5	4276.6	3583	4070.7	3399.4	3622.5	4769.5	5548.7	5502.9	2592.2	11839	5337.6	6060.4	2390.6
210558_at	8.8	2.9	5.4	43.6	6.8	26.4	8.8	7.1	16.4	13.1	21.9	31.3	38.2	10.9	13	58.6	9.1	27.9	18.1	31.6	10	43.9	4.1	73	65.4	34.6	73.4	60.8	66	38.8	11.4
210583_at	44	23.3	13.7	24.4	69.7	33.2	44.2	48.4	35.9	25.9	65.3	73.6	45.2	17.5	92.6	321.5	96.4	123.7	69.2	121.2	24.1	21.2	50.5	23.3	16.3	82.2	151.3	119.3	163.6	85.8	94.5
210609_s_at	44.9	163.2	160	181.6	223.6	186	70.1	142.9	94.9	212.1	127.2	111.6	108.9	143.8	287.7	203.6	45.5	166.4	33.8	230.8	193.4	247.5	39.4	65.3	284.6	249.4	302.2	270.7	360.3	273.2	36.7
210635_s_at	98	45.1	65.5	93.1	109.5	104.2	125.2	76.5	146.6	108	218.2	90.9	125.5	121	140.2	156.3	72.1	87.3	101.1	93.4	98.5	115	113.4	84.3	158.7	114.6	83.1	162.4	174.2	189.7	153
210642_at	13.2	14.5	26.1	10.7	8.3	9.8	13.6	26.6	57.9	16.6	28.5	24.5	19.9	15.4	15.8	27.2	17	9.3	35.3	8.5	16.4	13.5	22.6	42.1	43.1	19.5	73.3	31.4	39	16.3	28.3
210643_at	5	30.7	9	4.5	19.2	18.9	5	6.4	9.1	69.7	7.2	0.9	2.8	11.2	7.8	33.2	53.5	24.4	77.8	35.2	3.7	14.7	40.8	6.9	35.1	3.4	110.5	91.2	26.7	28.9	27.4
210659_at	78.2	89.3	73.1	89.8	89.4	102.3	74.9	96.4	68.1	151.9	46.5	107	166.8	82.2	186.1	185.2	106.5	139.9	143.2	145.2	228.4	158.3	157.4	70.4	185.8	122.8	349.9	62.5	130.1	256.8	78.6
210662_at	1.2	3.9	2.8	5.2	1.7	0.5	5.5	4.8	25.8	2.7	42	11.3	1.6	13.2	5.9	23	3.4	25.1	5.3	2.7	18.8	1.2	1.5	5.3	109.9	12	5.4	34.6	14.6	46.4	12
210675_s_at	345.7	326	476.6	98.7	274	272.5	281.5	328.8	294	301.3	307.7	228	217.5	158.9	130.1	350.2	124.1	359.3	236.6	390.9	195.6	387	224	177.5	193.1	208.7	398.3	78.4	122.3	203.4	229.1
210719_s_at	281.8	186.2	237.8	262.1	179.8	284.5	603	440	266.4	497.9	470.4	216.2	434.2	397.5	329.1	347	341.8	426	439.2	341.8	301.1	258.3	258.1	385.8	342.5	377.1	408.7	519.3	528.9	699.4	326.7
210726_at	50.2	71.9	49	126.6	62.5	36.2	66.7	61.9	69	110	130.7	53.3	55.1	72.4	25.4	127.2	112.5	97.7	168.9	20	63	81.1	144	55.1	73.9	75.4	450.8	191.6	155.2	207.1	71.1
210751_s_at	475.5	463.6	409.7	169.2	327.2	417.3	500.9	429.6	794.5	402.5	364.6	336.5	634.6	648.2	517.3	405.1	500.3	478.1	361.4	443.7	474.1	687.6	473.4	527.5	617.2	367.1	830	673.3	632.5	501.5	650.7
210765_at	13.1	47.8	23.4	55.4	23.5	43.3	26.1	29.1	10.9	18.7	83.8	37.7	100	45.7	32.4	34.1	45	32.1	23.1	11.2	30	46.9	20.9	42.3	26.5	49.1	107.1	72.7	49.9	120	55.6
210775_x_at	458	435.4	376.7	580.6	504.8	546.3	598.9	594.4	625.3	629.8	435	467.9	571	597.6	568.7	523.9	542.8	527.5	456.3	647.9	491.2	476.1	468	632.9	777.3	625.4	789.6	512.5	636.9	668.5	532.1
210778_s_at	233.4	472.3	399.2	500	312.4	326.7	652.8	443.6	475.5	362.6	612.3	288.1	496.9	302.8	551.9	550	482.5	370.3	647.3	600.8	467.1	368.9	425.8	559.5	530.4	554.9	1332.2	636	667	576.4	213.8
210793_s_at	150.1	225.7	261.3	256.6	202	171.5	263	280.8	249.7	194.5	262.1	204.3	281.7	267.7	373.6	208.1	296.2	281.1	289.1	249.1	263.3	303.1	331.8	212.9	275.8	295.6	291.3	196.6	327.7	288.8	364.5
210802_s_at	196.3	36.3	124.6	45.2	38	125.5	14.1	118.5	106.1	34	48.5	95.4	150	94.4	37.3	56	26.3	52.4	12.1	14.5	25.2	139	13.9	33.1	26.8	34.9	11.3	17.1	11.1	15.2	28.1
210835_s_at	1683.8	2476.8	1223	2413.6	2091	1670.2	3234.5	1641.9	2197	2502.1	3933.1	1932.8	1249.7	2593.2	2222.3	1695.4	3768.9	2275.2	4302	2122.8	2993.3	2575.6	2142.3	2996.4	3335.1	3118.8	4628.8	3633.3	3457.8	2816.2	1352.8
210896_s_at	357.1	77	621.1	382.1	534	617.2	544.8	714.5	713.8	212.7	280.5	398.7	925.5	324.2	363.2	523.2	221.2	238.9	373.1	370.6	612.4	550.4	370.6	253.3	311.4	309.5	186.8	244.3	198.6	225	559.4
210910_s_at	424.3	464.6	206.4	335.1	331.3	158.9	364.2	400.7	171.5	189.6	472.5	426.8	207.2	345.7	244.6	357.1	462.5	572.9	534.8	323.1	122.5	341.9	275.5	457.3	470	677.1	665.7	449	452	629.8	239.8
210912_x_at	373.8	320.5	507.6	573.1	484.5	424.8	539.5	453	586.1	446.1	612.4	390.6	497.4	389.1	527.9	713.3	455	435.8	521	477	417.1	540.3	397.4	451.7	608.1	643.3	572.6	568.3	557.3	617.1	567.1
210972_x_at	151	126.7	156	193.6	82.6	196.2	288.9	144.8	111.6	114.4	436.9	155.4	156.6	171.1	129.3	260.3	184.2	151.1	183.8	121.2	175.1	252.3	172.4	31.8	327.6	238.7	615.1	247.8	280	293.4	137.1
210992_x_at	9.7	20.9	6.2	14.6	25.9	24.4	19	45.1	23.8	19	35	21.4	10.8	17.8	20.2	33.5	9.3	26.3	26.5	19.9	14.1	16.2	15.7	21.2	34.7	104.3	21.5	52.8	31.3	26.7	35.2
211026_s_at	2643.4	2409.9	2571.8	2597.6	3318.6	2373.5	2597.2	3105.1	2422	2750.1	3720	2581	2880.2	2100.9	1968.9	2333.3	1761.9	2120.2	2824.8	2982.2	2414.8	1798.7	1685.3	2177.8	2800.1	1927.5	1983.3	3931.5	1913.4	2292.9	1937
211039_at	11	12.6	11.2	15.2	22.2	13.3	22.9	17.9	37.5	46.1	36.6	11.6	30.8	10.3	18.3	28.6	32.8	22.7	12.8	67.6	12.1	12.6	51.7	43.2	138.5	40.9	27.3	160.9	45	31.6	13.4
211056_s_at	946.1	527.3	401.9	250.9	686.9	639.9	303.9	294.3	212.9	285	326.6	614.8	429.7	176.9	385.1	278.7	237.6	299.8	210.3	499.7	64.8	47.8	68.9	53.8	106.5	223	52.5	425.1	61.3	54.5	190.1
211146_at	7.6	9.4	5.2	14.7	11.3	8.2	11.4	6.4	7.6	13	37.6	10.5	7.8	11.2	13.5	7.5	10	6.2	17	5.8	11.2	13.8	29.3	11.4	12.8	12	19.9	13.1	13.3	21.4	8.3
211160_x_at	356.9	414.9	391.1	442.7	359.5	473.2	338.2	394.1	403.4	376	205.2	620	357.5	466.5	205.1	327.5	389	442.1	415.1	329	546.9	275.7	93.8	69.5	301.8	452.4	239	444.8	311.9	212.5	325.3
211168_s_at	493.4	733.8	484.6	531	432.4	354.9	485.6	387	535.5	586.1	584.2	403.9	386.3	435.3	482.3	396	611.1	380.9	609.7	518.3	489.3	401.4	505.2	537.6	844.1	585.8	700.3	766.9	592.2	827.3	416.5
211180_x_at	70.7	165.8	28.2	53.7	65.6	74.3	56.2	95.5	35	86.5	25.2	47.8	65.6	81.6	94	83.7	209.8	79.1	39.3	43.6	51.3	41.4	45.4	206.6	104.6	61.9	192.1	129.3	99.6	294.3	100
211184_s_at	222.7	197.2	154.3	356.7	235.3	299.8	326.8	242.7	436.7	90.3	442.2	213.8	407.1	510.7	492.6	238.5	654.5	429.6	308.8	168	473.8	292.4	290.8	322.2	444.6	412.1	775.1	120.2	722.7	749.3	411.4
211208_s_at	602.7	421.8	549.8	611.2	585.9	565.3	854.3	602.4	832.9	687.4	659.2	580.7	513.7	580.6	871.3	440.3	504.3	576.6	795.1	495.1	831.9	781.9	754.3	947.3	620.1	1014.1	974.9	666.8	824.4	744	613.7
211252_x_at	470.8	566.6	372.2	500.1	490.4	285.1	349	376.5	508.8	851	1571.9	469.7	290.6	712.4	422.3	593.4	886.3	529.4	336.9	654.2	404.3	665	523.1	624.8	795.5	527.1	1037.8	371.8	972.7	747.7	534.9
211270_x_at	506.1	290.1	527.1	845.8	664.5	511.1	608.3	648	491.7	1039.8	539.1	424.4	652.6	822.7	762.2	541	927.5	573.7	1167.6	861	611.9	730.1	693.2	1236.1	947.4	857.6	1061	481.6	1059.1	919.3	764.6
211286_x_at	42.1	17.4	26.7	41.4	40.1	20.7	33	18.1	35	33.3	38.8	23.3	76.8	51.7	59.6	26	39.5	34	76.9	32.5	148.1	87.1	101.4	122.2	168.9	18.2	30.8	95.2	144.2	259.8	49.1
211297_s_at	226.5	148.3	268.8	89.7	213.1	224	192.6	245.1	230	184.6	11	234.2	168.1	167.6	176.5	185.5	89.1	168.7	134	344	146.3	190.5	225.2	52.2	160	178.7	32	25.6	77.6	100.9	161.7
211307_s_at	9.2	3	3.6	4.9	3.5	2.7	7.4	4.2	8.5	3.9	11.3	2.8	3.7	2.4	13.8	4.1	9.5	3	68.9	8.5	9	3.2	12.8	18.6	15.3	14.6	13.2	10.2	48.9	112.5	3.9
211360_s_at	123.1	98.1	128.3	195.6	125.7	91.9	54.4	28.7	132.2	222.6	342.7	104	115	147.6	72	108.7	153.5	207.2	131.4	213.1	164.2	133.4	191.1	244.4	203.8	140.9	422.8	217.9	188.5	254.9	27.3
211410_x_at	69	55.7	80.5	92.6	55.6	67.4	72.5	178.1	75.8	84.9	130.8	67.4	52	91.8	101.7	101.1	204	64.5	110.5	92.7	61.3	71.5	86.2	122.1	255.9	98.2	144.5	216.1	141.7	351.5	80.5
211412_at	8.5	5.8	22.8	10.1	5	5.3	5.3	32.6	17.8	11.8	17.6	8.3	29.3	44.3	31.8	11.3	10.5	52.3	31.3	8.8	30.7	3	15.9	5.1	27.5	49.8	120.4	11.3	13.9	21.4	15.3
211435_at	69.2	91.6	78.4	58.7	59.5	18.8	30.2	160.8	56.6	101.8	31.8	92.8	31.1	132.5	170.8	184.8	75.1	110.5	122.5	29.1	42.5	109.5	93.1	91.4	332.2	92.3	260.7	156.7	26.6	222.8	100.6
211439_at	136.6	128	80.3	128.2	162	29.2	239.6	153.1	180.7	215.9	429.6	110.5	193.4	87	134.8	225.2	103.9	110	165.8	145.4	147.8	95.3	154.2	70.7	275.9	108.5	235	373.7	189.8	268.7	198.5
211472_at	97.8	15.8	47.2	28.2	75.7	19.6	50.4	130	52.3	66.4	312.6	66.4	116.4	90.4	57.6	161.6	13.1	36	75.2	94.3	41.8	25.6	107.5	25.3	233.6	74	73.8	67.2	234.5	133.4	84.7
211496_s_at	54.6	66.4	53.1	47.6	66.6	75.5	153.3	46	111.5	59.8	31.4	43.2	11.8	38.7	26.8	103.7	102.2	12.3	28.5	7.5	64.4	22.7	32	16.5	30.1	10.9	27.4	32.3	23	10.9	23.3
211514_at	27.6	4.6	10.1	11.9	9.9	24.3	62.9	46.5	65.5	19.6	15.4	79.5	13.1	25.4	55.4	49.3	130.1	9.9	3.7	21.7	2.9	8	14	18.9	134.3	90.4	106	126.4	36.2	12.2	65.6
211518_s_at	12.8	13.2	13	12.5	11.3	13	17.8	13.7	18.5	14.7	30.7	11.2	13.5	13.4	13.8	16.6	16	17.5	16.3	19.1	15.8	10.1	15.4	28.4	22	108.7	43.3	22.5	27.9	26.3	10.5
211535_s_at	420.1	528.7	501.7	738.3	537.4	429.8	609.7	776.4	430.7	1032.9	438.5	427.7	623.3	585.6	720.7	539.1	1166.7	780	574.7	851.1	645.1	403.9	474.4	754.6	469	938.6	626.6	810.8	925.7	848.3	811.3
211549_s_at	14.1	8.8	7.1	20.4	19.6	2.2	60.4	11.4	7.9	3.2	14.2	45.4	99.8	11.5	72.9	64.6	4.3	42	52.6	47.5	8.5	24.9	40.1	34.5	114.6	2.8	83.9	90	45	25.7	43.5
211584_s_at	68	39.9	59.2	60.7	98	254.7	79.1	62.3	268.8	272.3	319	254.5	229.4	162.6	164.3	231.9	255.1	187.7	294.5	266.1	59.9	143.9	236.8	224.7	354.3	109.4	287.7	280.6	380.2	197.1	122.1
211606_at	11.6	13.7	38	13.3	5.8	40.9	58.3	52.1	23.2	9.7	29.5	7.2	44.4	42.1	53.3	28.7	36.9	31.6	16.4	9.3	50.3	31.4	92.9	56.3	194.7	59.6	123.5	177.2	104.8	223.2	45.5
211616_s_at	166.4	245.7	178.6	196.5	135.9	182.1	225	172.5	232.2	139.3	445.9	180.1	136.1	101.9	193.9	130.5	177.4	177.7	128.9	147.2	113.3	108.2	207.7	100.4	282.5	96.3	140.1	28.7	147.9	155.8	99.2
211619_s_at	54	25.8	4.3	71.2	4.5	6.3	5.9	6.6	10.4	14.8	12.8	10.3	13.7	7.9	6.4	35	5.5	17.4	4.8	25.6	26.8	32.1	17.3	13.1	14.9	13.5	44.6	11.6	17.1	12.2	14.8
211641_x_at	104.5	119.5	113.1	88.8	41.8	41.1	122.2	107.5	71.9	99.8	183	16.4	121.5	109.7	89.1	91.5	21.4	67.2	26	107.3	27.5	98.5	236.2	91.5	185.8	122.3	155.7	27.2	152.8	222.5	116.7
211674_x_at	4.8	5.8	5.5	7.8	3.8	7.2	5	19.1	38.6	8.8	20.2	6.3	5.1	4.8	7	10.4	11.2	3.6	26.6	8.9	18.1	7.1	9.4	10.9	21	11.3	52.7	34.3	8.5	37.8	8.8
211675_s_at	220.8	264.1	272.4	292.6	335.5	262.8	460.1	301.1	465.6	489.8	526.1	236.5	684.4	443.9	713.6	167.5	541.5	525.6	529.5	448.6	731.8	710.7	330.4	580	423.5	743.9	527.9	644.8	1035.1	612.4	398
211677_x_at	294	305.8	415.6	329	462.2	471.9	361.1	301.2	445.5	409.9	1084.7	620.5	605.2	282.3	211.2	551.9	422.4	514.2	396	459	510.2	195.9	170.7	257.7	83.2	152.7	135.1	140.4	289.1	165.7	419
211684_s_at	2830.4	2676.8	3240.3	3363.4	3288.4	2696.4	2959.4	4018	2821.1	2992.6	1469.1	2879.7	3461.1	4395.1	3090.5	2704.5	1835.7	2729.3	2658.8	2792.2	3003.8	3574.5	4009.8	3888.5	2439.9	2454.2	1780.1	2220.1	2732.9	2495	3264.4
211711_s_at	289.6	185.6	206.3	144.8	185.7	179	230.8	192.3	195.3	171.5	158.1	173.2	182.5	115.9	183.4	147.4	115.6	152.9	260.3	148.1	202.6	115.6	166.9	149.5	134.7	343.4	138.2	117.4	131	218.7	120.8
211719_x_at	2032.5	1170.4	873	1254.8	1886.2	1915.9	1128.4	1476.6	1364.6	1352.3	1200.2	1019.3	1176	1865.5	1784.5	2996.4	1056.6	2270.7	1453.9	1770.5	1447.3	1968	1255.7	1714.8	719.7	1072.1	44.7	1107.6	796	1001.7	760.9
211735_x_at	17.4	17.7	21.9	35	36.4	18.4	44.1	32.7	33.2	36.2	51.8	25.1	50.2	30.4	29.8	23.4	64.2	31.9	30	39.2	33	20.4	44.3	22.5	60.4	23.4	45	44.9	37.3	42.4	44.1
211737_x_at	1631.5	1889.2	2058.8	2612.4	2417.3	2506	2271	3434.5	2015.8	1627.8	3591.3	2278	2866.7	2955.8	2648.6	2187.4	1876.3	3179.5	1943.2	2496.3	2388	2913.3	2129	2252.4	1035.3	951.8	2367.3	1407.2	2290.1	1583.4	1381.9
211758_x_at	1459.6	1132.5	742.5	697.9	686.4	1307.9	720.2	993.6	760.7	672.9	287.5	805.9	1227.1	783.2	951	738.6	570.3	750.6	429.4	655.3	586.9	999.9	727.3	561.4	643.5	470.1	458.1	620.7	378.6	507.1	1285
211765_x_at	14905.9	11831.8	13810.4	11741.5	13733	15614.8	10972.3	14350.8	9649.4	10741.3	5198.8	15293.4	13656.6	14064.4	10989.1	13781	8021	11645.7	11078	13900.4	9321.1	12323	10677.8	9595.3	8091.5	9433.4	6114.5	9279.7	6582.9	7311.8	15583.9
211788_s_at	4.4	6.1	4.1	4.7	5.3	3.5	4.7	5.7	7.4	6.9	10.3	5.2	4.1	4.3	6.2	5.2	6	4.9	6.8	5.5	6	3.7	7.2	8.5	12.5	4.2	15.4	11.2	7	12.2	7.1
211808_s_at	67.2	13.9	26.2	22.2	38.3	24.4	25.3	17.6	29.9	157.9	57.5	19.9	17.6	45.7	35.8	40.8	30	84.6	41.2	98.9	36.6	52.6	100.3	49.3	256.5	84.9	68.4	39.3	73.7	32	54.2
211835_at	12	10.7	11.7	13.3	15.3	12.3	22.9	16.4	27	15.9	33.8	12.1	15.9	11	19.9	16.6	15.5	14.4	19.8	11	10.2	12.9	34.4	19.2	28	26	59.1	17.5	21.6	24.4	18.7
211839_s_at	14.2	16.1	16.4	10	15.9	9.2	23.7	24.9	13.3	19.7	47.3	19.6	10.4	16.3	20.7	16	20.7	14.4	21.8	18.3	23.8	22.9	25.7	27.9	21.3	23.4	43.2	29.6	31.6	42	27.5
211840_s_at	12.4	10.1	8.3	11	14.8	11.9	14	13.1	24.5	25.6	68.5	10.1	23.3	36.2	23.4	31.7	17.6	30	13.8	8.1	22.6	25.2	26.4	39.5	19.9	8.2	40.6	16.3	36	32	17
211843_x_at	20.4	29.8	18.3	17.1	26.2	17.3	39.9	36.9	21	61.3	72.4	23.3	30.8	63.6	36.9	26.8	56.8	18.4	27.4	25.7	33.8	15.6	23.2	86.1	64.2	29.9	116.2	64.1	59	30.6	28.8
211858_x_at	15342.7	9989.6	14975.3	10477.6	14342.4	12679.8	9940.9	10212	7775.8	10484.4	3090	10433.7	13296.8	10001	5622.5	12485.2	6644	10095.6	11022.7	8900.3	5659.4	7412.2	5203.1	6347.7	8734.9	9853.6	1405.9	11170.6	4017.8	5542.6	8074
211862_x_at	132.7	193.1	295.7	257.6	239.6	282.9	284.5	313.5	292.2	183.9	290.2	200.5	289.2	356.2	442.1	272.7	236.3	201.2	468.6	264.1	245.6	280.6	474.1	460.9	321.8	355.5	332.8	283.4	414.2	397.7	309.2
211875_x_at	12.6	15.2	23.1	31.5	27.8	24.3	19	31.1	83.9	31.9	52.7	12.1	21.3	25	17.4	45	30.5	40.4	39.8	16.5	59.2	14.7	32.5	31.1	33.8	26.6	327.1	40.2	59.2	48.7	36.6
211901_s_at	37.6	8.4	229.9	84.8	157.4	94.1	70.8	29.5	208.9	26.7	107	130.7	43.7	39.4	82.2	248	116.9	163.2	124.1	273.2	101.2	53.1	73.9	87.3	34.2	57.6	27.5	11.3	20.6	20.9	57.4
211928_at	3444.8	3929	4988.6	3130.1	3823.7	4271	3289.3	3857.8	3499.4	2761.8	2201.8	4089.1	3399.6	4276.3	3125.7	3423.7	3874.6	4346.9	4031.3	4400.7	2772.1	3271.4	3490.9	2517.9	2101.9	2754.9	3186.4	2455	2741.1	1961.8	4375.2
211951_at	1462.8	1849.3	1342.6	1463	1356.9	1575.7	1715.5	1412	1331	1509.6	1190.5	1599.6	1476.1	1243.2	1197.9	1623.2	1377.9	1051.8	903.5	1247.5	1123.6	1111	1303.3	1498.2	1532.1	1256.8	997.4	1476.3	1173.8	1009.4	1241.4
211959_at	820.7	2792.9	1976.4	8893.6	1565.6	1307.6	1704.7	1723.7	3861.4	2562.1	1868.3	2620.3	3193.5	2187.4	3290.9	2401.3	3576.4	3432.2	2697.6	1303.7	4263.4	6261.4	2130.4	7602.5	2820.3	3626	4392.4	2268.9	3277	2927.5	2258.9
211978_x_at	16278.9	13902	15873.8	14076.8	14799.5	18491.2	12490.6	17011.2	11912.4	12311.5	6823.2	16100.2	14937.6	17625.1	11858.7	15760.5	10484.4	12845.2	13300.7	16056.2	11940.6	14602.6	13169.7	11705.4	8945.8	11755.5	7046.5	10390	8306.8	8565.6	15652.4
211980_at	701.8	1567.1	296.9	1108.6	843.9	697.9	460.6	881.1	522.2	143.8	494.7	711.4	444.1	531	444.3	356.8	559.4	410.9	611.6	219.3	706.9	219.9	390.2	264.1	422.5	422.2	116.9	437.5	313	765.2	190.9
212122_at	126.4	131.5	232.6	246.9	139.7	112.2	139.1	113.2	140.3	326.4	135.5	225.2	291.5	203.9	320.1	224.9	298.2	186.6	297.2	257.7	330.2	347	254.9	361.8	247.5	395.4	163.9	296.6	418.4	221	215.7
212135_s_at	1192	1470.3	2133	1263.6	1411	1605	1451	1256.1	1126.4	1220.5	1208.9	2600.5	1516	1035.7	1238.1	1668.4	1096.1	1368.1	1164	1839.8	1428.1	1526.7	921.4	1032	557.5	1077.4	910	1218.9	1002.3	1191.8	643.4
212148_at	2170.5	2235.9	2103.5	1358.1	1674.7	2139.1	1668.7	1849	1872	1945.8	1145.9	2198.8	1997.6	1803.9	1773.7	1809.7	1315.5	2016.9	1596.9	2255.6	1753.1	2017.4	1422.1	1146.1	1271	1353.2	1253.8	1673.8	1397.9	1385	1492.4
212149_at	6214.9	6395.1	4990.4	3674.6	5260.4	4766.9	4299.3	3680.6	2846.7	5631	2304.9	3526.3	3674.1	4007.2	2161.7	10104.5	5561.1	4739.2	5547.1	7609.4	3276	2990.7	4238.4	2251	3616.6	2458.4	1599.6	3312.1	1757.5	1532.1	1869.7
212186_at	3096	2286.3	2049.7	2059.6	2521.6	1934	1991.4	1860	747	2852.4	1130.6	1997.9	2173.9	2548.7	1398.9	2592.6	2527.5	2758.8	1913.7	2691.6	1707.5	1539.4	1539.4	1495.2	1765.3	1756.2	1518.8	1242.1	1647.1	2355.9	1156.8
212207_at	72.9	311.4	241.9	239	161.3	166.2	202.8	187.6	367.2	304.6	170.6	272.8	373.6	142.9	613	315.2	368.4	241.5	376.8	339.3	363.9	243	338.3	464.3	368.1	299	892.8	474.6	492.5	338.9	260
212214_at	1709.4	1299.4	1461.3	838.7	1332.6	1413.2	1003.1	1034.6	1281.8	1111	818.8	1272.8	1203	1135	1046.3	1478.4	902.6	1241.8	993.3	1124.6	1155.8	1009.3	767.7	707.7	634.4	1095.1	652.5	1040.1	766.4	774.3	1033.1
212220_at	56.8	61.1	92.8	70.1	88.8	56.2	103.4	63.6	100.2	55.3	154.8	57.3	71.8	53.5	134.6	84.8	135.6	90.4	68.6	117.8	93.6	45.2	150.9	134.4	118.1	130.1	277.3	20.9	19.4	188.7	112.8
212240_s_at	745.9	1599.9	2385.6	1178.6	1075	1251.7	1125.4	880	1098.9	993.9	1044.6	1355.6	1173.6	1263.2	1235.7	1146.2	988.3	916.1	1061.3	1548.6	1347.3	1235.9	1461.1	1166.4	872.2	763.7	981.1	1020.3	1084.5	645.8	951.5
212249_at	142.6	276.8	269.4	272.6	173.2	289.4	135.3	266.9	139.9	333.9	707.3	214.4	288	197.5	471.8	272.4	289.9	208.6	418.2	318.8	378.5	382.2	417.1	596.6	332.3	204.7	605.9	310	348.7	239.1	324.7
212252_at	890.1	994.4	1463.6	731	799.9	1156.9	749.1	838.6	949.2	903.3	959.9	808.2	785.7	749.4	734.8	833.1	857	1090.3	513.9	1265.8	576.7	589.4	732.5	600	733	631.5	527.1	902.6	599	484.3	502
212256_at	309.7	337.8	365.4	503.1	462.9	385.9	593.1	407.4	371.1	419.1	546	442.6	483.3	602.3	814.1	342.1	773.3	482.2	496.1	364.6	893.2	571.1	577.7	832.4	690.1	621.6	735.1	288.6	667.8	630.2	503.4
212262_at	518.3	450.5	474.8	785.8	513.2	486.8	506.4	497	574.5	776.7	675.7	407.8	794.4	781.5	751.5	526	714.1	764.4	728.1	542.5	747.5	986.6	703	884.2	915.3	556.6	1145.1	542.3	1147.9	592.2	844.8
212273_x_at	15184.6	17927.4	17601.3	15089.3	15178.2	14954.9	14148.8	15002.6	13028	16010.3	10737.1	14995	13809.1	11900.5	8516.9	12819.2	15835	11146.1	15232.1	15450.3	9131.8	14715.7	9950.1	12833.8	11280.5	13482.6	4232	16210.2	6366.3	9257.6	12018.6
212299_at	339.3	648.8	722	887.3	843	523.9	797.6	564.3	714.1	1157.9	360.7	527.6	594.9	918	767.2	599.9	861.3	573.9	844.5	825.7	860.2	693.2	1138.3	571.7	1050.9	1077	997.8	734.2	1213.5	919.1	536
212330_at	480.4	397.4	456.1	466.4	416.7	489	490.6	600	514.5	363.6	277	412.2	578.9	384.9	395.9	412.9	188.1	369.8	349.7	431.1	515.8	471.9	350.7	484	360.4	403.9	267	626.1	286.6	400	400.5
212358_at	3394	5945.2	4815.9	4310	4572.5	4119.8	3520.6	3885.6	4320	4753.5	3576.5	3862.5	3573.8	3098.2	2894.3	4263.3	5239.2	4591.1	4603.9	4412.6	3687.2	3049.3	2693.2	2898.2	2497.2	2475	3616.3	2993.6	3075	2159.2	3098.9
212411_at	1141	912.9	822.4	989.3	960.5	939.9	850.2	903.9	681.9	707.1	1301	872.5	737.4	856.3	618	776	835.3	872.3	997.7	849.4	710.5	570.2	596.6	674.1	810.4	619.3	579.3	549.7	644	666.7	840
212415_at	27.3	71.7	13.4	203.5	30.5	29.5	29.5	44	47.8	59.5	49.7	63.9	44.3	97.2	36.3	25.2	60.9	28.1	27.7	27.2	54.4	25.5	101.5	29.9	51.6	132.4	57.1	69.1	53.2	57.1	60.3
212427_at	2292	1975.2	892	923.8	1640.6	1608.6	953.6	1641.8	1195	1026.6	587	1131.5	1432.7	910.4	810.9	959.9	626.1	1356.9	1044.6	775.6	602.6	825.7	1112.6	521.2	1397	522.6	599	1088.5	621.8	635.2	636.7
212428_at	2775.3	2251.3	1059.1	1641.3	1571.6	2620.9	1023.8	1728.4	942.4	522.4	619.5	2621.8	2169.3	1374	1202.4	1130.6	625.8	1371.4	905.8	852.1	739.6	804.8	1034.7	552.6	934.7	774.7	615.7	766.3	666.5	431.4	1310.3
212434_at	572.4	644.3	655.6	576.1	485.7	541.9	425.3	526.1	501.6	692.8	341.9	556.8	416.5	577.3	265.4	549.9	441.9	429.6	174.6	568	422.7	376.6	467.7	322.1	356.5	480.6	45.5	405.3	235.1	368.3	442.6
212454_x_at	4495	2634.4	4969.7	4091.9	5343.5	3648.1	5121.1	4145.8	4581.4	4667.4	1075.4	3302.1	4138.2	5463.3	3753.5	4459.4	2114	3725.1	2775.3	3245.5	3484.8	3903.5	3422.7	5324.1	3413	3023.7	823	2045.5	3060.7	4027.2	4003.8
212458_at	875.5	576.7	990.6	793	855.6	809	763.6	463.8	572.8	1086.6	507.9	671.7	554.8	617.2	785	805.7	432.2	829.8	1044.4	936.1	798.2	638.6	495.3	604.8	506.2	584.7	236.3	674.6	548.4	663.2	669.3
212480_at	299.9	348.4	438.4	377.3	333.7	300.1	380.5	417.9	504.8	488.9	485.2	284	262.3	314.1	486.6	441.8	523	329.2	579.2	555.2	408.9	417.4	381.3	521	512.3	689.1	693.1	398	647.6	456.2	403.8
212496_s_at	755.7	1734.2	567.3	1225.1	720.7	566.5	763.1	762.2	1009	1127.7	940.4	802.3	488.6	713.2	521.5	603.8	1338.7	1121.2	1538.9	844.9	1106.7	585.4	1006	1055.5	1353.5	766.6	2438.4	1084.2	1206.3	879.3	766.4
212517_at	1113.7	1353.5	1052.4	1000.6	1219.3	1190.1	628	1001.7	1054.3	904.8	966.5	1244	1283	1010	794	1161	818.5	832.7	734.1	1011.4	979.2	1140	852	841.7	547.1	1025.7	329.4	925.2	746.1	865.6	905.5
212518_at	2994	2957.9	2039.7	2414	2072.5	2106	2169.8	2094.2	2212.3	2481.1	2470.1	2703.6	1851.3	1800.1	1767	1989.6	2500.8	2288.1	2481.9	2457.5	2386.4	1171.5	2035.5	1668.3	2197.7	1917.5	1228	2509.7	1890	1891.2	1295.2
212540_at	2023.2	796.2	638.4	747.8	623.9	641.7	588.5	543.9	711.4	1981	635.4	859.8	506.2	767.6	737.6	531.6	776.4	926.5	784.2	878.5	820.5	725.4	443.8	635.9	808.6	898.3	944.3	819.5	735.9	1683.7	722.8
212544_at	1346.8	919.6	935.2	748.7	1061.8	1010.5	1036.7	734	755.3	720	692.2	891.1	816.8	974.6	751	1081.1	522.5	918.2	723.4	817.2	740.2	831.8	860.8	856	739.2	826.2	432.1	695.2	589.8	612.7	910.5
212579_at	431.2	470.5	472.5	347.9	467.2	356.8	331.5	305.5	405.3	432.1	251.1	413.1	362.9	325.3	519.1	421.7	335.9	364.4	336.7	432.4	578.4	527.7	520.1	608	298.7	344.5	342.4	263.2	304.5	327.5	346.1
212581_x_at	17354.4	22723.5	18723	23147.7	25964.3	22489.6	21017.9	26485.1	23635.2	13558.3	26903.6	23065.3	21902.3	20065.5	23028	23348.1	26717.9	25030.2	28355	22220.8	27274.4	24847.5	27687.3	24652	18298.6	22275.6	17359.8	16547.8	20177.4	15617.6	21408.2
212586_at	864.7	945.3	766.9	957.3	1090.1	943.6	940.7	1065.5	1294.3	1395.4	773.6	995.9	1114.9	1268.3	1478.2	1526	1376.7	1124.6	1041.3	1250.8	1300.6	1827	910.8	999.1	1231.6	1466.3	776	1119.9	1608.4	1612.3	1399.7
212594_at	158.1	398.4	197.5	215.6	153.1	120.8	202.9	117.3	228.7	199.4	289.9	182.8	218.4	243.9	285.6	219	435.9	209.4	458.1	283.1	262.3	325.8	312.9	219.4	321.5	337.2	322.8	117.9	426.2	289.6	258.9
212598_at	310.2	469.7	408.1	236.4	340.6	328.8	289.5	548.8	379.6	283	226.4	311.3	308.6	350.7	354.1	251.7	163.6	315.9	276.8	259	377.5	393.3	272.9	549.8	257.4	425.4	150.8	272.1	247.2	215.1	267.6
212606_at	1481.3	884.3	1470.2	1691.1	1907.1	1506.9	2199.4	1852.1	1708.3	1537.8	1262.7	1478.5	1751.4	1679.8	1493.4	1718.7	979.7	1295	1605.1	1576.2	1381.1	1250.6	1723.8	1599.9	1314.3	1842.8	739.8	1173.5	1247.1	1244.2	1028.5
212610_at	4434.2	4272.9	4197.9	4395	4695.9	3397.4	3680	4114.6	4674.1	5125.2	2333.5	4675.5	3952.2	4486.7	5087.9	4134.9	3438.2	3233	4759.3	4554.1	5267	4740.3	5454.6	5671.3	4737	4730.5	5771.6	4706.8	5253.9	5117	5060.8
212614_at	1799.9	1804.2	1960.7	1934	2236.2	1739.5	1744	2064.8	1583.1	2085.9	1397.4	1797	1535.9	2371.6	1467.8	2107.3	1467.8	1547.9	1233.1	2064.5	1852.8	1194.7	2012.1	2307.4	1604.1	1669.4	1130.7	1211.3	1233.8	1872.6	1044.2
212636_at	5566.2	6889.3	5731.8	9557.8	7293.8	4643.8	6755.4	6642.4	12138.8	8677.2	10206.4	6356.7	6994	9597.5	13315.9	7925.5	8728.7	8475.7	12720.4	8360.1	11433.3	12870.9	13924.1	12275.1	9999.6	9019.9	16129.7	7072.7	13592.7	13088.3	7972.9
212637_s_at	182.2	276.6	176	167.4	181.3	166.7	125.5	168.1	328.7	169.6	135.2	150.9	184.6	149.9	246.1	216.1	96.8	140.5	197.6	180.4	198.8	236.8	203.9	235.3	222.8	157.2	108.2	128.6	124	35.5	126
212661_x_at	14661	11866.7	14862.5	13297.6	13498.5	18808.8	11670	15941	10377	12610.7	5274.8	15033.4	13020	17939.7	11563.4	15590.7	10293.9	13300	10937.5	16694.4	10447.7	14893.3	10782.4	11340.7	9716.6	11142.2	7302.5	10637.6	8151.1	9221.1	14409.4
212702_s_at	142.7	187.1	318.2	263.8	266	162.9	217.9	206.1	34.4	49.9	28.6	195.9	67.3	170	68.4	80.9	27.7	118.3	124.6	179.2	38.8	110	60.7	54.2	45.1	292.9	11.5	69.6	32.2	29.1	59.8
212709_at	93	143.6	181.6	179	171.6	108.2	172.9	154.1	264	229	205.9	134.2	160	203.5	163.6	197.4	179.8	128.6	234.3	224	220.4	233.6	203.9	277.7	271.6	225.7	29.7	244.2	259.8	198.4	272.4
212730_at	1116.6	1393.4	1849.2	2982.8	1904.7	1242.8	2325.3	2780	2624.8	2639.3	1434.3	1202.4	2393.6	1929	917.5	2170.3	3980.3	2940	3618.8	1682.5	2498.8	5178.2	3854.1	4021.3	3004.3	4389.1	2919.1	2674.2	3923.1	2841.6	2441.5
212732_at	657.1	1883.9	939.5	1193.4	1143.1	907.5	1370.2	1128.3	1161.4	666.9	1664.6	1126.1	877.5	895.4	943.9	1260.4	1263.8	1226.4	1192.4	1026.9	1368.6	613.1	1218.7	341.1	1007.2	830.2	961.4	971.2	690.1	495.9	508.3
212738_at	91	233.1	149.4	187	124.8	235.2	151.6	86.1	64.1	239	111.1	166	79.6	320.8	245.7	101.3	330.5	316.1	313.5	196.4	51.3	295.3	260.1	64.8	241.4	248.6	114.8	67.1	501.2	513.8	251.3
212741_at	1044.5	1072.7	1450.5	975.5	1244.9	1707.1	1743	1721.9	1392.9	959.1	1355.9	1317	1282.6	1140.6	1008	1264.3	1113.2	1164.4	1316.6	1435.4	1290.7	1245.5	786.6	916.5	920.6	1191.8	811.9	814.1	1160.2	1048.5	1002
212745_s_at	77.1	95.6	118.8	70.4	111.7	80.2	95	84.9	83.1	49.5	20.1	91.2	96.7	78.3	93.7	81.4	27	38.1	76.3	95.1	127.7	60.6	128	13.4	47.2	68.3	59.6	9.6	46.3	16.4	138.1
212761_at	1318.6	2492.2	1772.9	1904.9	1931.8	1597.5	2051.1	1561.5	2115.6	2642.2	3035.9	1352.2	2114.1	1785.3	2183.8	1826.3	2797.7	1959.4	3950.6	2626.2	2410.1	1891.3	1983.4	2448.4	2582	2614.4	2859.4	1854.2	4448.4	4119	1706.5
212769_at	91.2	111.2	84	111.2	83.9	46.2	77.3	117.8	195.6	83.1	215.2	68.4	76.6	79.9	120.8	87.5	204.5	121.9	114.9	88.9	159.6	120.6	103.1	163.2	155.2	178.3	118.2	146.2	146	303.8	101.2
212788_x_at	17460.2	27867.3	18389.5	26182.2	25670	18534.8	29540.5	29621.2	26545.4	23336.5	42193.5	20222.7	18808.3	24130.8	26847.2	23772.3	39691.4	27082.9	35317	30275.6	27896.4	35002.8	30266.5	36165.5	40493.4	35972.2	51162.4	23255.7	38195.3	36263.9	17642.2
212791_at	2782.5	2874.8	2319	1840	1463.6	2627.6	1414.7	1364.4	1252.6	1216.7	1406.7	2620.5	1630.2	1240.3	1487.3	1811.6	1374.5	1971.7	1588.6	1690.6	1387.9	999.6	946.3	1115.6	1156.6	1237.5	803.8	2368.3	1057.9	963.6	1820.1
212826_s_at	2132.8	1969.4	1785	2012.6	1929.5	2466.8	2055	2167.9	1537.5	1430.2	1946.2	2058.2	1960.3	1406.2	1605.7	1562.8	1977.4	2430.1	1779.7	2145.6	1544.8	1590.5	1722.5	2067.5	1410.7	1074.2	1431.6	1268.3	1910.9	1597.7	1932.4
212846_at	905.8	1246.9	909.3	1207.3	946.1	730.8	936.5	927.5	1436.9	1247.9	1072.8	727.2	804.6	1056.2	1349.3	929.8	1366.3	1088	1251.7	1261.1	1176.3	1368.4	1432.6	1338.4	1603.1	1301.7	2949.6	1512.9	1464.2	1155.9	1033.1
212851_at	338.4	374.2	468.7	352.6	432.1	404.4	349.6	526.8	498.8	368.8	408.9	424.1	321.6	326.6	391.4	514.4	471.5	432.5	451.7	493	446.5	339.1	463.4	406.7	287.7	465.5	210.7	304	304.2	386	317.3
212879_x_at	23.1	40.8	33	20.9	17.2	14	35.3	28.3	27.7	37.6	20	21.6	15.2	39.7	19.4	22.1	48.5	26.5	186.3	26.1	21.3	21.2	31.5	51.5	50.4	42.3	261.5	25.7	58	30	54.1
212885_at	228.3	382.9	307	287	252.5	261.5	327.4	308.2	299.6	180.7	21.8	284.2	229.4	429	234.5	220.5	227.2	153.9	212.8	339.9	255.6	235.4	365.4	252.8	210.7	314.2	108.8	232.4	150.9	250	245.6
212891_s_at	367.5	317.4	200.7	217.7	241.5	191	210.7	368.8	124	264.8	95.2	200.2	211	187.1	33.8	348.5	184.8	203.9	218.6	279.6	211.7	125	31.8	174.9	251.2	136.1	46.4	144.2	87.3	134.1	168.4
212899_at	1818.8	2175.7	1612.9	2259.8	2093.7	1499.1	2252.1	1894	2232.4	2959	2463.9	1238.7	2286.6	3662.6	2928.4	1660.3	3234.4	2217	2973.3	2161.1	2516.4	2704.3	3542.1	4069.7	3892.9	1902.8	7599.9	2385.1	3754	3634.8	2289.5
212909_at	861.1	252	218.3	330.3	322.3	232.8	233.6	260.6	299.4	203.2	217.4	531.8	266.9	287.5	264.6	154	49	256	478.7	194.3	438.2	197.5	129.2	220.2	158.8	129	53.9	111.1	194.2	574.8	146.8
212923_s_at	293	369.1	307.8	656.6	457.6	244.5	542.9	563.2	477.7	454.5	583.2	294.6	339	344.2	574.7	406.3	729.4	452.7	850.1	398.2	688.5	727	460.9	847.2	590.4	1476.2	700.8	611.7	606.4	482.6	539.4
212928_at	6063.6	7769.6	6629	4833.7	6389.2	5763.9	4673.7	4663.8	4736.9	6354.8	3692.3	6564.4	5309.9	4147.5	4630.5	6249	4620.8	5734.3	4595.3	6827.6	5168.3	4824.5	4670.5	2659.7	3712.1	7477.1	2478.6	4767.9	2786.9	3253.5	4210.2
212930_at	4431	6150.7	2809	1855.6	2836.9	3367.3	1349.6	1919.9	2505.9	3355.5	646.4	3582.1	2788.5	1164.8	2557.6	2568.8	1958.5	2571.5	1923.9	2961.6	3054.9	1671.6	2235.3	749.3	2123.6	1316.2	529.2	2451.4	722.8	1338.1	1041.5
212943_at	807	1028.6	1497.7	807.3	1171.4	1221.4	906.8	983.2	947	1080.3	474.2	1108.2	940.8	804.8	820	1333.4	560	1021	800.1	1549.2	956.4	1029.8	985.1	638.3	562	674.8	479.6	475.8	733.6	619.3	819.8
212976_at	991.2	1102.2	608.3	330.9	442.2	761.7	380	356.3	519.3	695.7	269	1147.3	450.9	448.9	427.1	272	451.3	721.2	442.4	612.2	1052.9	322.4	539.5	362.8	475.1	301.5	171.6	325.5	239.1	264.4	274.2
213036_x_at	15.4	21	13.3	53.1	18.6	20.6	37.6	41.5	20.4	21.3	57	20.2	42.6	28.4	37.3	30.5	46.1	18.4	36.6	20.8	34.4	78.5	23.8	45.6	34.4	24.9	63.2	89.8	57	33.1	29.1
213045_at	2794.6	4351.4	2208.9	1896.1	1737.6	2688.1	1699.2	1326.9	2501.3	1959.5	2339.3	3330.4	1844.6	1858.4	1740.2	1146.2	1851.9	2411.1	1327.8	2408.1	2078.4	1384	1702.3	1714.6	1241.3	1458.6	1597.1	2484.7	1361.2	1577.7	1457.3
213058_at	354.5	440	348.1	430.3	535.4	425.9	830.6	403.8	406.6	645	558.1	217.1	343.9	424.8	480.8	340.2	664.9	612.6	509.3	589.5	701.8	608.5	487.8	561	917.6	479.7	915.7	658.2	834	846.8	437.1
213065_at	727	650.7	1233.5	1095.5	1170	812.7	1338.9	1272.6	1087.8	901.6	837	862	959.3	1319.2	1078.8	1108.4	853.9	879.2	1065.9	1140.4	1157.6	989.8	1281.2	1264.8	870.8	1043.2	835.8	876.8	893.6	1079	798.2
213070_at	1311.7	1382.9	1413.8	1152.7	1223.4	1230.1	1331.6	1170.2	1630.6	1527.5	1122.9	1056.8	1262.3	1464.2	1959.9	1095	849.8	1364.4	1391.7	1393.9	2333.1	2169.4	1161.8	1613.7	922.7	838.6	502.2	1034.5	1450.3	1336.6	1000.9
213105_s_at	345.1	397.1	232.6	343.1	347.6	304.5	235.1	254.3	345.2	316	390.9	541.3	255.4	310.9	479.2	175	366.9	403.9	354.9	334.8	386.5	303.6	523.3	699.7	610.3	383	461.8	431.3	235.4	451.4	456.5
213140_s_at	766.6	958.6	1380.1	838.5	1072.3	880.8	919.3	814.7	871.9	1049.2	587	785.5	879.3	759.4	709.6	1375.9	810.8	819.6	1028.9	1159.9	704.3	733.4	1179.4	727.4	719.1	769.3	612.3	828	570.5	759.4	673.6
213142_x_at	671.6	360.7	558.2	555.1	455.3	594.8	428	554.2	580.2	374.5	403	490.9	675	418.6	545.4	483.3	303.8	630.5	260.6	441.1	494.6	710.7	435.5	434.4	287.5	236.9	261.7	478.6	464.6	438.8	501.5
213156_at	826.9	1664.8	539.6	1866.4	1051.2	798.4	1127	1282.2	1882.3	1194.8	667.3	1100.5	1280	952.7	1794.5	821.9	1473.3	1359.3	1988.5	856.4	2771.4	2146.7	2544.4	2373.3	1940.7	3050.1	1937	3417.1	1846.8	1865.4	1405.4
213172_at	1274.1	1100.6	342	401.2	522.1	861.5	343.9	489.1	663.1	734.9	886	728.5	709.8	175.8	423.5	702.6	478.7	628.9	800.8	719.1	330.2	197.1	368.1	262.6	701.4	152.1	254.5	609.6	196.7	190.9	134.7
213197_at	1975.6	1862.6	2528.7	1166.2	1380.8	2162.2	1173.1	1402.9	1572.7	1093.7	677.1	2318.4	1760.4	1728.7	1385.4	1172.6	638.3	1521.5	1060.4	1610.9	1743.2	1771.8	864.8	691.3	585.3	1060.1	447.3	1154.5	748.4	907.3	1310.4
213222_at	6764.2	6739.5	6091.1	4251.6	5364.8	6429.7	3798.7	5373.6	4328.3	3797.8	2609.2	5668.4	4858	3422.7	3754.7	5513.3	2775.5	4874	3595.9	5078.4	4549	2645.8	3584.4	1726.2	2527.4	3762	845.4	5363.2	1615.4	1993	2707
213223_at	569.6	712.1	500.8	490.6	594.1	423.7	682.9	551.9	662.2	617.8	563.9	431.5	316	475.5	577.1	527.9	549.6	554.1	492.6	512.8	424.4	467.9	782.8	527.5	863.5	809.2	655.4	1207.3	776.1	919.4	472.7
213234_at	1985.3	1969.9	1488.6	1495.8	1458.9	2201.1	1426.6	1395.9	1463.1	1500.7	1617.4	1865.1	1719.5	1091.3	1279.3	2670.9	1287.1	1364.6	1213.4	1508	1111.3	885.5	1160	1242.5	1101.6	1096	998.7	1638.3	926.3	1151	1261
213236_at	1028.9	1535	1601.3	2475.1	2049	1556.8	3063.3	1887.6	2438.3	1787	3417.6	1968.7	1735.7	2265.9	2040.2	2073.4	2169.4	1820.1	5420.7	2011.9	3070.9	1596.4	2202.2	3932.8	2828.4	3372.6	2670.8	2524.2	3393.9	2849	1579.4
213246_at	255.7	131.8	244.2	202.2	225.4	231.6	250.5	176.7	272.1	187	205.9	148.4	270.8	306.8	247.3	149.5	173.3	178.4	191	167.6	226	264.9	321	178.1	295.5	292.8	339.5	292.6	187.9	200.6	373.6
213256_at	147.6	106.7	132.5	227.4	220.7	173.9	182.7	324.6	205.5	288.8	350	160.5	244	133.4	299.7	154	651.6	138.2	426.2	171.6	336	380.3	183.1	267.6	366.5	448.7	256.7	211.5	494.1	445.5	269.9
213262_at	1345.9	1411.1	1573.8	919.9	1085.4	1041.1	795.7	810.4	947.3	1170.4	630.8	1202.6	929.1	1017.5	820.5	1354.9	867.3	952.9	996	1294.9	1215.2	918.9	968.9	965.7	780.7	802.9	508	926.9	645	595.4	638.1
213271_s_at	1206.8	1133.6	1332.3	751.6	739.5	1230.2	716.8	956.9	824.8	676.9	746	1060.3	862.9	852.9	778.6	816.2	953.2	994.8	862.8	1127.3	663.7	761.4	702.5	628.5	410	365.8	721.2	600.4	617.8	655.6	1059.1
213307_at	1424.9	2082.1	1151.3	1338.9	1438	1547.3	1645.9	1180.3	1673.8	2021	2014.6	1219	992.5	786.3	1213.9	1459.6	1584.7	1588.4	2093.7	1659.9	1594.3	1127	1401.7	938.1	1080.3	1128	1697.7	1680.4	1024.3	939.8	856.7
213308_at	959.8	1291.4	1035.3	941.4	1065.7	1154.7	1023.2	784.6	699.6	1005.2	881.7	1297.7	1050.1	506.8	605.7	1254.9	748.6	923.9	839.8	1071.6	1048.7	589.9	967.3	532.8	609.9	625.4	354.7	1011.2	448.2	445.6	707.7
213309_at	647.9	649.1	503.9	222.3	268.3	481.5	383	269.9	282.4	239.3	239.5	620.5	300.3	175.4	117.1	598.9	271.2	411.9	139.1	362.3	162.8	226.1	193.2	87.8	232.6	248.3	40.4	205.8	184.4	121.5	457.4
213312_at	306.3	284.9	364.6	171.3	216.5	337	234.8	324.6	291.7	23.4	176.9	262.4	261.4	307.2	256.3	411.4	214.2	337.8	366.6	269	242.6	210.4	284.2	203.5	170	192.2	128.5	189.9	131.7	70.3	250.3
213317_at	225.7	210.2	188.8	177	326	269.1	112.6	173.8	181.7	230.2	62.7	153.4	134.2	223.5	342.8	304.4	174.1	179.7	163.5	204.9	19.4	328.6	154.7	187.2	201.6	58	165.1	137.3	64.8	81.9	83
213333_at	905.9	1018	1356.4	843.7	640.8	1071.1	845	716.1	690.1	772.4	678.7	1145.5	758.8	782.4	599.1	778.4	690.5	827.9	617.3	1061.9	706.9	586.4	555.6	590.7	750	694.6	647.6	806.9	729	751.9	647.8
213366_x_at	6093	4567	4200.2	3236.1	3366.1	5392	2646.9	3970.3	2433.9	2440.2	1719.6	5029.3	3853.8	3843.4	3021.7	4342.5	1951.7	3327.3	2349	3418.9	2383.2	3203.9	1982.6	2021.7	1892.5	2342.8	753.6	3189.3	1528.2	1848.9	4217.5
213392_at	459.3	655.3	506.8	561	614.9	657.6	808.9	854.8	784.5	783	567.3	498.9	883.5	586.9	842.2	785.6	633.4	726.2	679.6	685.4	810.9	1302.1	697.8	944.8	1106.2	985.8	1093	850	1089.3	1410.3	686.6
213400_s_at	760.6	986.1	461.7	1096.7	900.7	606.5	1081.7	743.8	1037.6	1317.6	1482.3	589.8	659.4	839.4	953.8	798.3	1926.6	1027.8	1376.5	1012.6	1288.5	861.4	945.5	1228.9	2087.2	1348	1917.2	1844.9	1969.8	1611.6	587.1
213409_s_at	327.3	154.7	81.5	98.1	109.5	163	234.1	211.4	131.2	183.9	107.5	176.2	83.7	166.5	237.9	249.5	158.9	124.1	164.2	144.4	203.1	240.3	179.5	218	216.2	184	239.6	237.9	186.3	211	205.3
213411_at	1970.4	1567	1886.3	1269	1429.9	2018.3	1223.8	1328	1939.4	1413	1219.3	2398.5	1207.2	916.1	952.2	1725.4	1069.7	1315.9	996.9	1830.2	1335.5	1215.7	1255.7	681.9	1093	1350	801.7	1680.9	1001.3	1128.9	1092.1
213413_at	77.9	74.3	87.8	164.2	85.7	95.8	254.2	237.3	221.4	290.8	217.3	100.8	387.3	144.8	126.2	172.8	290.9	251.1	207.5	193.1	355.7	182.1	263.1	275.1	350.8	347.2	252.9	215.6	479.4	418.5	313.1
213422_s_at	528.1	405.5	372.1	496.6	364.8	540.5	465	638.4	753.4	416.1	1315.3	453.2	667	449	702	295.4	728.2	379.3	661.3	532.7	594	544	251.7	638.4	732.8	621.2	732.3	585.2	1024.8	760.8	640.3
213435_at	1122.7	1141.8	2445.4	877	1068.6	887.7	777.5	591.1	607.3	1850	273.1	952.7	933.7	809	521.9	915	472.5	667	614.7	1815.5	468.6	667.3	664.6	477.1	719.9	614.4	222.5	565.6	439.4	571.3	168.6
213448_at	475.1	793.7	519.2	462.2	508	516.5	551	560.9	561.3	658.6	1321.8	412.6	425.9	301.3	399.3	658.1	554.1	519.2	549.6	784.7	463.9	376	389.1	642.9	833.7	585.1	941.9	710.4	829.3	675.5	463.7
213455_at	493.9	340.5	449.4	749.6	567.1	496.1	1120.4	765.9	806.3	760	685.6	467.3	755.8	789.8	815.1	468.8	662.8	787	645	506.3	1180.6	1079	867.8	797	1004.8	692.5	978.2	994.6	932.7	953.2	913.9
213457_at	155.1	264.6	153.8	170.6	185.4	148.7	128.4	189.4	100.3	207.1	138.7	247	242.5	118.3	156.7	220.3	132.3	140.7	286	177.3	231.6	136.9	112.1	173.4	155.7	234.8	207.2	275.2	236.6	198.1	195.4
213473_at	104.9	211	162.7	192.4	163.4	208.5	130	260.2	155.5	175.1	221.9	217.2	257.9	255.1	316.5	172.6	179.3	216.8	271.2	265.8	247.7	260.3	243	107.4	330.7	285.6	212.9	234.3	272.4	201.7	236.8
213515_x_at	470.3	202.9	354.5	288.6	319.6	443.3	326.2	444.2	656.1	482.1	653.8	368.9	603.3	415.2	861	326.8	255.8	447.7	302.4	372.8	527.3	236.1	501.6	1030.3	61.3	309.2	222.1	102.3	194.1	313.3	226
213518_at	925.5	957.5	710.7	596.6	609.5	903.8	383.3	587.8	724.6	649.6	521.2	899.2	669	760.5	760.4	663.8	496.5	887.6	504.1	850.2	820.3	720	636.7	637.9	405.2	674.2	146.2	406.3	507.4	497.5	583.2
213536_s_at	14.3	21.5	5	9.6	15.8	23.3	12.8	11.7	18.7	25.4	32.3	6.3	7.4	4.3	18.4	10.7	5.5	82.6	13	11.5	16	24.3	8.3	8.3	61	79.1	36.2	16.8	11.8	81.2	28.7
213537_at	182.7	72.2	107.8	336.6	110.4	209.6	39.1	114.6	80.7	88.6	62.4	180.2	226.6	277	237.2	169.2	250.6	134.5	151.4	81.7	214.1	432.6	305.1	177.9	223.7	191.3	165.3	203.3	212.8	323.6	395.4
213567_at	359.1	384.1	384	303.5	346.5	339.4	361.3	325.6	354.3	402.8	319.6	371.8	408.3	396.8	445.5	254.2	463	450.9	486.4	404.8	474.2	391.3	455.4	385.2	595.8	385.7	395.5	502.5	571.4	465.8	518.6
213570_at	119.3	72.6	108.5	154	189.6	55.8	199	116.3	331.5	230.3	75.3	167.8	265.8	214.1	183.1	173.6	185.5	136	112.3	130	219.7	137.8	322.1	81.9	267.4	111	318	280	354.7	278.5	248.4
213586_at	12.4	7.1	6.6	7	10.1	8.9	8.8	8.8	19.7	12	12.5	5.6	16.1	7.4	19	88.7	16.6	22.2	9.4	14.1	31	12.7	13.8	13.1	25.6	11.9	13	29.4	95.1	12.4	12.8
213596_at	96.3	98	117.9	139.1	133.3	100.1	176	265.8	122.7	116.8	204.9	91.4	118.4	85.6	191.2	215	188.6	119.4	223.2	158	126.6	118.8	146.8	193.3	233.9	161.1	201.8	175.6	204	304.7	158.8
213605_s_at	306.4	572.2	458.2	628.7	1055.3	374.1	510.8	319.8	1232.7	855.5	612.6	378	341.6	1024.1	696.2	428.7	748.8	390.3	2034.2	863.1	644.4	684.6	1652.2	770.6	847.8	920.3	1144.9	580.6	1133.6	897.8	592.2
213612_x_at	3378.4	3448.2	3873	5555.1	4724.4	3659.4	5417.9	4131	6361.6	6977.9	4845.2	3107.2	4929.9	4666.5	5382.4	4617.9	4711.9	4424	5337.6	5738.5	5476.6	5188.3	4701.4	5708.5	5909	5974.6	5663.2	5842.2	7153.1	8050.4	3925.7
213629_x_at	3301.2	8283.6	1715.6	4747.4	6811.2	3933.6	5261.2	5981.2	6350.3	12647.1	8996.8	5135.4	8175.1	6748	6651.9	7665.4	2499.3	5769.2	8588.3	5381	7175.6	5915.9	7059.8	8966.5	10195.5	11136.5	4893.7	19801.1	9403.1	11238.3	4215
213637_at	251.6	404.1	281	385.8	264.1	246.7	401.4	308.5	356.8	555.5	405.1	246.9	267.4	300.6	245.8	348.1	328.3	210.9	460.1	422	283.4	320.5	358.9	374.3	466	440.5	535.4	351.8	477.4	436.3	254.2
213639_s_at	261.6	333.3	402.1	457.4	323.8	337.6	549.8	407.4	313.3	458.3	574.2	382.8	283.2	386.7	469.2	329.9	450.3	409.3	508.3	547.4	334.2	346.6	565.4	472.7	469.8	442.8	1193.2	452.6	500.3	588.3	415.2
213641_at	155.5	121	34.6	141.2	113.7	197	240	185.7	271.1	475.8	728.9	120	106.9	206.1	184.7	197.2	265	84.3	403.2	85.4	164.3	193.7	220.6	393.4	440.3	226.9	983.9	511.1	202.9	332.7	223.4
213655_at	4689.5	3792.3	3844.6	3302.1	4206.6	4854.2	3371.6	5334.7	3069.4	2207.3	1493.3	4943.1	4584.5	4948.9	4657.4	3386.9	1583.2	2814.5	2273.4	3078.9	3578.7	4619.5	3613.1	5646.4	2800.1	2607.9	2132.4	3688.4	2139.2	2812.2	4112.7
213666_at	1180.9	939.8	721.6	783.4	977.8	996.9	856.5	768.5	747.1	1040.8	860.2	821.5	958.4	550.4	791.4	1142.9	894.6	898	621.6	717.1	454.7	477.1	614.2	400.8	426	358.2	364.3	674.1	428.7	463.2	551.8
213676_at	2275.6	2762.5	1926	1806.9	1738.1	2293.7	1690.4	2269.6	1685.1	1397.8	1633.7	1935.1	1687.3	1007.6	1006.5	2069.5	1567.9	2542	1508.1	1914.1	1275.2	823.7	1055.2	911	2244.3	1412.5	974.5	2328.1	1016.7	687.4	1394.5
213683_at	341.2	156.3	402	203.9	226	379.3	270.2	375.8	201	275.1	98.8	288	354.5	202.1	332.6	525.8	114.9	304	146.7	244	301.4	253.3	139.1	210	153.3	124.1	84.5	218.9	142.8	47	372.6
213705_at	299	969.4	218.5	471.3	314.1	243.3	260.6	298.4	426.2	612.5	475.9	295.7	215.4	336.9	581.3	520.6	526.4	395.9	420.1	523.9	461.1	450.5	534.9	610.3	1312.9	318.4	2691.2	757.7	777.2	857.8	374.2
213710_s_at	930.1	211	508.4	475.3	655.9	598.7	454.7	1075.7	441.7	154.9	389.8	595.1	807.6	472.8	617	522.4	131.3	486.9	548.8	460.6	690.5	481	457.3	741.8	91.4	387.5	171.9	431.5	300	170.6	460.8
213712_at	397.5	456.7	280.6	339.3	442.3	439.8	374.8	422.2	446.5	380.8	159.5	371.1	472.1	645.6	745.3	366.3	409.2	397.6	237.4	399.4	647.8	620.8	232.1	216.2	109.9	247.8	40.5	315.6	327.7	344.3	323.3
213721_at	806.1	1024.2	729	1068.9	853.9	702.2	1134.8	705.9	1170.4	1553.7	1319.4	624.8	934.3	762.5	986.7	1010.4	1212.9	844.6	1490.8	853	758.9	1333.3	1253.4	1097.7	1318.3	1255.5	2463.9	1443.4	1142	1169.9	627.8
213741_s_at	273.2	243.8	265.5	186.2	356.1	143	277.2	281.8	274.3	305.4	23	253.8	212	237.6	166.1	287.1	176.3	197.7	196.7	247.7	276.6	189	281.6	319.9	286.5	326.5	300.5	312.3	344	353.3	299.8
213749_at	67.5	18.5	26.9	176.5	105.7	13.8	31.4	158.8	210.4	108	113.6	99.9	157.1	33.4	195.7	23.1	323.4	149.2	57.3	116.3	172	247.1	144.2	235.1	228.3	247.6	243	352.1	372.3	70.3	292.8
213771_at	402.3	708.6	497.3	550.3	390.7	609.9	478.5	307.6	489.7	681.9	391.8	696	331.3	513.3	277.2	430.7	677	636.3	516.1	636.6	479	320.7	444.6	487.5	678.9	521.9	804.1	659	527.5	719.5	896.9
213778_x_at	199.1	135.4	209.9	241	43.3	179.9	61.4	153.5	220.8	199.7	415.9	164	130.4	331.3	187	237.7	170.7	133.6	221.3	311.4	159.7	314.9	143.9	65.5	288.4	247.7	404.4	67.2	280.9	402.4	27.9
213792_s_at	485.5	1179.1	545.2	860.2	781.8	560.7	812.1	459.2	532.4	933.3	1092	583.2	447.7	701.3	656.6	496.9	1045.6	640.3	1405.6	758.3	644.4	463.6	788.6	1022.7	1802.2	1001.4	2760	1093.2	908.3	1124.9	541.3
213806_at	14.2	18.8	14.1	7.7	8	8.5	11.6	15.4	16.6	9.9	24.7	12.6	17.2	14.1	13	24.6	12.9	10.1	12.6	18.1	7.1	11	9.2	40	20.3	17.4	30	77.4	15.3	37	22.3
213817_at	71.8	32.4	65	160	75.7	19	53.3	79.1	190.1	97.4	53.2	59.7	73.8	39.8	217.2	170.5	83.1	80.9	141.3	90.3	170.6	107.9	182	181.6	171.5	154.8	77.9	172.5	150.2	183.2	91.4
213822_s_at	199.2	402.7	223.3	127.6	175.5	220.6	166.8	214.5	146	248.2	56	207	168.8	404.5	171.9	231.6	222.2	164.2	181	355.1	131.1	212.6	228.4	292.7	396.4	103.9	351.8	337.3	400	291.2	291.6
213846_at	1772	1262.9	1061	959.9	1205.8	1489.9	1112.6	917.5	842.7	935.2	661.1	1192.6	779.4	994.5	693.1	1155.7	711.5	972.4	793.3	892.8	800.5	806	939.5	815.8	695.7	901.5	482.2	873.8	632.5	671.3	978.8
213849_s_at	2747.5	2882.6	2249.4	1352.4	2109.7	2547	1306.6	1475.3	1748.4	1429.4	997.3	2400.1	1797.8	1801.1	1866	1838.5	1575.8	1853.8	1284.7	1880.3	1865.5	2362.6	1504.2	1501.1	1145.4	1252.6	1211.8	1315.7	1046.8	1065.4	1939.8
213852_at	1538.4	1803.9	1175.9	1213.3	1551.1	1707.1	1642	1342.1	1437.1	2471.2	1904.9	1696.8	1908.9	1647.7	1919	1749.5	1716.2	1927.1	1418.8	1817.7	2095.2	1837.1	1592.5	2043.5	2317.3	1079.1	1459	2225.3	2225.1	1950.2	1957.1
213869_x_at	2721.1	5049.6	1972.3	2741.8	2506.2	2284.1	1773.8	1981.5	2303.4	2393.6	3276.5	3715.8	1997.8	1926.6	1652.5	2491.1	2656.8	2880.9	2408.1	2944.7	2708	1322.9	1975.4	1396.7	2201.4	2007.7	1853.9	2154.5	1356.9	1063.2	1608.8
213870_at	123	164.7	110.4	145.7	181.4	132.2	148.5	134.1	51.9	253.5	40.4	94.2	15.5	232.7	252	31	274.6	182.3	132.7	101.7	120.5	123.8	87.5	19.8	265.8	188.1	381.7	307.2	255.2	240.2	109.9
213906_at	113.4	174.6	110.2	165.6	194.2	147.5	225.3	236	180.8	196.8	233.5	132.7	187.3	164.1	205.9	257.7	178	136.4	280.3	120.2	249	264.1	394.2	370.6	270.1	247.8	231.2	174.3	282.4	279.7	227.6
213913_s_at	743.1	693.2	673.1	491.4	554.1	592.5	422.7	460	418.4	568	729.8	469.5	597.1	368.7	294.8	496.3	699.2	514.9	284.4	638	298.3	264.8	290.1	188.5	314.6	301.9	329.8	536.2	330.6	223.6	486.8
213916_at	200.8	178.5	182.9	284.2	205	173.6	237	190.1	143	276.2	347.2	95.5	342.3	191	119	243.5	323.2	197.8	171	217.8	113.6	236.2	345.2	369.2	261.4	295.1	361.7	257.7	281.3	241.7	301.2
213921_at	1677.9	1026.6	935.9	729.4	1418.8	1210.2	798.1	800.9	492.6	664.4	342.1	2186	808.1	766.3	222.9	502.4	957.7	647.2	400.9	320.5	166.1	610	393.9	326.4	580	177.9	493.7	422.7	387.6	345.8	2928.6
213927_at	823.6	930.3	773.1	674.6	887.6	897.9	788.1	580.2	689.4	942.8	713.1	765.5	564.8	595.9	507.3	1000.4	1056.8	957	757.9	900.3	701.3	387.9	551.8	496.2	675	536.5	286.5	692.4	456.1	464.8	632.6
213929_at	134.7	94.5	118.7	172.2	83.6	153.8	186.6	152.2	189.6	371.6	215.4	161.4	177.7	137.8	218.3	164.2	206.3	187.8	209.9	163.2	171.7	275.8	124.7	336.9	356.3	271.8	361.5	271.2	307.7	305.2	187
213967_at	2654.8	1979.3	2432.8	1378.3	1798.6	1831.9	1002.1	1308.1	1088.5	2216.3	1269.3	2236.4	1538.1	1257.9	889.6	2559.6	1520.7	1590	1336.7	1941	879.3	704.8	912.9	537.2	885.2	745.3	967.5	782.9	376.8	633.5	1026
213981_at	99	130.6	29.5	125.9	155.7	35.9	42.1	52.3	95.4	152.3	97.1	109.8	146.8	139.4	190.8	69.1	202.6	85.5	161.3	215.9	315	221.4	163.2	72.1	63.9	151.3	396.2	146.9	277.6	220.7	216.5
214050_at	81	88	91.7	76.9	129.1	17.5	193.8	118.3	82.5	88.1	191.8	48.9	81.6	86.2	91.3	166	32	24.6	19.5	152.5	18.3	86.3	44.8	55	163.6	141.6	115.7	150.6	140.6	243.2	98.9
214057_at	176.3	229.1	185.7	193.3	203.9	130.4	224.8	240.6	300.7	304.9	494.1	176.2	205.8	177.5	291.2	234.4	252.1	133.5	318.9	186.8	272.7	215.6	238.2	405.5	385.5	255.7	363.3	276.1	328.9	398.2	187.6
214098_at	755.1	520.9	1800	440.7	723.5	729.8	760.2	487.8	619.1	1242.6	376.6	679.3	563.9	439.5	392.6	1053.6	803.6	936	535.4	2092.4	458.2	668.9	594.9	219.4	511.3	367.7	502.4	503.4	475.7	491.4	558.5
214150_x_at	2207.6	2857.2	1740	4121.6	3189.7	2349.3	3755.2	3123	4116.4	3555	3085.4	2441.9	2244.5	2249.5	4046.4	3356.9	3754.4	2615.9	3978.2	2357	4213	4106.6	3777.9	4184	4984.2	4173	4669.5	4018.4	5669.6	4968	2656.3
214159_at	44.1	37.2	47.7	62.7	28.1	2.2	63.7	61.9	41.4	36	95.2	44.8	75.6	44.8	22.2	10.2	93.3	70.3	81	52.3	62.4	81.3	102.1	51.5	126.8	49	101	278.7	150.4	190.4	69.1
214175_x_at	135.4	208.7	182	160.4	221	209.6	155.9	467	281	257.4	333.9	367.8	247.9	111	295.9	284.2	266	183	408.5	156.9	376.7	612.7	149.7	153.5	367.1	227.9	352.7	289.5	432	742.3	504.7
214177_s_at	756.6	1317.4	1130.5	1524.6	1861.7	1136.4	1566.3	1380.9	1764.4	2261	3291.1	1639.1	1958	1406.6	2198.6	1153.1	3582.9	2794.4	3904.3	1691.3	3135.5	2753.2	1382	2104.2	1865.9	1930.7	3547.7	1805.5	4608.9	2373.2	1653.3
214182_at	125.9	140.9	126.3	131.7	103	118.9	177.9	171	188.2	103.4	28.9	134.4	143.5	89.7	257.8	135.4	133	109.8	161.6	128.1	166.8	289.4	203.8	257.7	194.3	153.1	152.3	199.6	239.6	196.4	196
214195_at	30.1	34.4	17.3	26.7	85.8	25.9	90.5	32.1	33.7	58.4	47.5	17.2	54.6	46.3	54.1	46.2	95.5	62.8	342.9	23.9	15.5	12.6	179.6	26	93	46.5	582.3	49	58.2	46.1	57.7
214211_at	5011.3	5323.4	4371.8	5878.3	7884	3985.5	5183.1	5234.9	5933.2	5608.6	6119.9	4566.4	4683.4	5963.9	7852.7	3081.3	6504	3703.4	6983.8	4790.6	7681	7687.5	6680.6	5544.2	6684.3	6996.5	7190.9	6976.4	6249.6	7017	5492.4
214217_at	1995.8	1998.6	1849.5	892.5	1187.5	1908	1093.9	775	1125.1	947.2	1158.9	2157.8	1573.3	869.6	847.7	1284.8	807.6	993.3	995.6	1340.1	962.4	757.6	982.4	586.6	849.6	978.7	853.8	1020.1	513.1	788.6	687.4
214221_at	236.6	382.2	180.6	326.7	297.5	228.9	256.3	211.7	192.1	233.4	294.9	276.1	212.5	316.9	232.2	222.6	332.4	446.9	313.7	252.6	227.9	250.7	351.2	331	366.5	205.5	521.9	375.8	405.2	362.3	344.5
214224_s_at	486.1	487.8	421.1	599.5	511.2	482.6	406.5	538.7	334.8	483.7	446.4	470.9	463.8	767.9	429.3	574.1	552.3	510.3	467.5	465.1	435.2	413.8	577.4	423.5	630	497	609.8	558	537.7	521	546.3
214279_s_at	334.9	164.4	2862.6	1149.4	4601.4	3686.8	2377.3	3896.1	3117.1	449.6	1812.9	1444.5	2776	2957.5	3298.7	1842.4	1574	1996.6	1733.3	1971.2	3439.5	5194.1	2236.8	1770.2	474.9	2114.1	2180.7	546.5	1628.1	387.6	1926.1
214292_at	13.7	20.5	13.9	10.2	16.8	22.1	9.8	22.8	114.1	15.5	33.8	16.6	21.6	15.1	41	13.5	22.8	25.3	111.2	22.4	54.9	157	18.9	33.9	32	19.1	34.3	26.7	70.8	51	55.7
214302_x_at	14.1	20.4	10.2	14.3	12.1	10.7	12	10.9	10.5	17.6	50.4	10.5	20.4	23.7	10.8	24.2	13	12.5	31.7	18.7	11.1	12.2	24.9	32.2	37.7	17.6	43.9	13.4	15.1	16.4	24.2
214314_s_at	129.9	263.4	76.5	230.2	124.1	84.7	148.3	110.8	169.3	249.9	224.6	140.9	102.6	124	289.9	96.6	388	155.1	198.3	106.4	125.5	178	340.9	203.2	400.9	167.5	763.4	252.3	356.5	255.5	151.3
214334_x_at	3905.5	4158.4	3629.9	5039.2	5205.5	5401	5216.1	5572.5	5296.3	7104.6	4986.8	5156.6	3628.8	7563.6	5103.7	4481.4	4892.5	6904.8	4088.7	6023.9	5526.1	7068.9	4583.2	7463.1	6628.8	3614.9	6103.7	5698.3	6807	7757.3	6676
214393_at	14.4	158.9	82	199	153	52	137.9	135.3	150.8	157.4	189.8	82.8	121.3	135.3	275.2	73.8	370.3	181.4	449.9	138.4	307.1	332.6	239.5	396.3	353.8	257.5	462.5	210.4	549.2	380.6	50.3
214403_x_at	89.8	159.7	89.6	99	94	152.3	71.3	98	330.9	70.4	159.6	39.1	291.9	108.4	96.7	107	197.6	63.7	231.6	186	255	163.3	288.5	491.5	102.8	187.8	292.5	181.2	147.8	282.5	223.2
214412_at	8.1	8.6	6.5	15.4	8.8	8	23.4	13.2	22.6	15.9	47.6	8.7	20.4	9.3	18.4	12.1	45.4	13	13.6	24.1	55.4	10.5	7.5	34.2	22.4	13.4	187.3	30	24.8	41.3	30.5
214417_s_at	64.7	84.7	79	62.2	62.9	74.4	115.3	85.8	37.2	132.5	154.8	91.7	106.9	98.7	84.5	109.4	94.2	95.1	64.9	119.1	104	66.1	77.6	139.5	177.6	85.2	204.8	196.5	105.2	168.5	127.7
214438_at	87.7	129.3	97.7	120.2	130.4	112.4	137.7	186.2	156.2	155.9	189.6	91.7	145.5	98.6	112.8	173.6	157.4	130.2	212.8	71.7	90.7	54.4	191.4	160.9	62.4	178.6	372.9	172.4	163	298	176.1
214466_at	11.4	44.3	14.6	10.9	25.3	29.7	68.1	48.6	27	59.6	18.3	17.2	45.1	28.5	20.4	63.8	52.2	49.8	103.9	59.9	15.5	20.2	106.9	30.5	73.6	32.9	120.1	39.5	34.5	30.4	32.9
214469_at	14	16.1	38	10.8	4.2	3.4	6.6	13.1	18.9	21.6	8.1	9.9	5.6	3.1	9	12	67.2	29.9	3.8	12.7	42.5	3.5	52.1	6.8	8	78.2	33.9	29.6	78.1	19.3	36.4
214486_x_at	146.1	178.8	197.5	327.3	236	188.4	185	318.1	255.3	186.6	502.3	149.8	290.2	241.1	236.1	289	347.4	231.5	487.6	232.3	256.7	231.7	413.7	342.4	368.5	329.3	458.4	379.5	375.3	377.7	263.1
214514_at	9	12.5	13.4	17.2	6.1	4.2	11.7	10	15.5	28.8	17.7	3.7	16	11.4	9.7	14.2	11.7	5.5	8.6	24.3	22.3	5.9	16	46.4	22.7	13.5	21.5	14.7	20.3	17.5	15.1
214517_at	15.8	20	38.2	26	19.8	23.3	38.3	25.8	24.2	57	77.2	20.6	36.8	8.7	19.8	60.9	59.2	26.3	25.6	30	39.6	32.8	15.2	41.7	45.2	28	72.8	72.1	52	31.2	34.7
214581_x_at	189.6	153.2	286.5	132.5	184.2	230.3	124.5	215	204.7	100.7	24.6	319.3	223.6	229.2	195	210.3	101.9	209.9	22.4	127.2	93.3	128.9	153.4	175.4	139.9	151.7	23.5	13	33.3	110.3	178.9
214600_at	118.7	197.1	52.5	116.1	125.7	146.7	151.6	155.9	132	161.8	222.8	117.9	188	84.9	292.5	170.4	215	151.8	150	60	182	215.3	66.3	230.1	172.8	174.6	220.1	202.7	199.9	67.2	178.3
214606_at	34	16.8	21	23.6	9.8	1.1	29.6	42.1	3.3	18.5	75.9	42.9	4.7	22.5	36.6	8.3	28.7	21.4	45	22.5	31.6	11.8	19.6	30.7	56.2	19.6	77	59.7	8.9	49.5	49.2
214607_at	3788.5	4670.4	3269.7	2995.8	3259.2	3086.9	3039	2742	2661.5	2182.8	3895.5	4073.7	2404.5	1774.5	2213.2	3123.1	4031.1	2845.2	3174.2	3061.9	2626.2	1698.9	2006.6	1337.3	2303.9	1983.6	1743.6	3006.9	1898.3	1721.7	1457
214615_at	6.2	8.3	6.2	4.3	9.8	40.1	29.3	39.4	55	48.1	21.4	50.9	31.1	43.2	12.6	67.7	76.3	34.8	6.8	6.5	13.4	39.1	9.8	89.2	174.8	36.6	9.6	60.4	60.4	66.7	55.8
214633_at	120.7	65.5	132.2	136.8	74.9	49.3	95.9	105.4	120.1	212.6	320.6	133.2	134.8	181.7	208.6	62.8	146.9	103.5	180.4	62.3	144.5	78.3	59.5	162	61.6	145	256.8	23.3	213.7	221.1	187.9
214651_s_at	33.6	11.5	5.9	65.2	5.2	9.6	29.7	34.8	24.2	9.9	27.9	2.2	44.3	32.4	37.4	73.6	17	37.8	40	43.5	43.1	6.5	11.2	6.8	106.7	3.8	51.6	142.6	61.9	111.7	49.3
214661_s_at	217.1	290.7	214.6	318.4	278.8	269.9	293.1	238.3	405.4	393	404.4	208.4	257.4	232.3	249.3	286.3	315.6	313.4	218.6	277.8	265.3	262.4	246.7	268	456.9	335.3	406.3	476.1	353.2	475.5	177.2
214674_at	117.2	99	116.5	173.4	104.9	126.5	69.8	130.6	95.3	136.2	301.4	151.3	188.9	177.3	229.1	270.1	253.8	231.8	252.2	194.2	118.8	84.6	86.7	248.4	203.3	111.1	229.4	306.1	250.8	256.1	248.3
214699_x_at	248.4	223.5	259.5	292.8	325.1	323.8	454.6	297.4	326.6	314.7	971.9	227.9	316.7	274.3	340.4	281	390.9	310.9	212.6	464.7	258.3	248.8	335.8	389.5	476.5	329	866.3	644.9	570.8	526	332
214713_at	344.4	315.6	319.1	480.6	336.5	405.6	420.1	383.6	459.7	468.6	246.4	322.1	358	266.3	254.3	513.7	162	283.1	250.3	352.2	370.5	207.2	358.2	260.6	109.4	260.2	249.8	149.7	488.3	193.1	215.5
214722_at	631.1	1485.9	841.4	915.3	931.6	597.7	1147.2	1296.3	1449.4	1042.8	1120.8	1049.2	1377.9	911.4	2232.6	701.8	929.3	1222.7	1771.3	1526	1327.7	2343.1	1322.5	1597.6	1768.2	1503.5	2079.1	1479.9	2127.7	2336.3	1344.7
214734_at	247.3	216.9	333.5	379.7	256.7	348.3	501.2	445.5	633.4	436.5	504.2	321.8	566.5	392.8	421.8	388.4	531.5	442.3	378.1	482.4	362	515.1	308.2	406.5	568.5	540.7	918.2	596.1	641.3	764	372
214743_at	894.6	915.3	713.7	857.1	894.8	454.9	797	655.3	678.7	2026.1	1010.6	445.2	466.9	890.3	783.8	689.7	817	734.5	1136.2	1070.5	636.5	787.7	1075.2	1285.1	1473.9	971.8	1808.7	1215.3	1015.4	1635.3	661.5
214774_x_at	718.4	637	436.4	589.5	632	442.6	451.9	431.5	366.2	419.4	108	514.8	399.3	570.5	351.8	333.3	469.9	331.8	365.6	407.5	264.4	235.2	507.3	480.4	424.8	258.7	196	264.9	189.1	322.8	177.7
214777_at	9.7	9.8	6.7	10.4	15.3	9.7	8.8	6.5	18	6.9	29.8	9.3	10.7	11.8	12.4	10.7	14.7	9.2	9.3	11.3	11.4	5.7	10.7	7.7	29.7	21.6	45.8	21.1	19.7	25.1	12.4
214781_at	459.4	498.7	305.8	372.9	283.5	584.4	309	412.5	341	289.8	225.8	618.9	345.1	209.2	224.7	390.6	259.1	592.9	361.2	163.7	385.8	295.4	333.5	345.4	264.2	280.4	230	368.6	200.2	163.4	91.1
214782_at	112.7	218.4	236.6	267.3	175.6	102.5	409.7	281.6	202.3	469.7	571.3	85.9	131.2	215	164.4	332.9	503.9	239.1	589.7	317.7	203.8	135.2	252.2	311.2	317.6	339.9	714.9	365.1	393.8	597.1	51
214787_at	136.2	270.4	244.6	192.8	258.2	193.6	210.8	205.2	210.4	168.7	13.1	215.1	163.9	168	191.1	152.3	212.7	197.8	183.6	199.1	235.4	216	180.4	231.9	180.4	324.3	77.1	165.6	119.7	110	153.9
214788_x_at	2928.8	4134.9	1589.4	2595.3	3814.3	4751.7	3744.4	3436	3128.3	2515.6	5399.7	4532.7	4248.7	1312.7	2665.5	1572.7	2656.4	4310.8	3063	1863.3	2772.4	1057	2281.2	2557.7	2011.4	1137.9	1104.6	2982.7	1931.1	3077.2	717
214795_at	228.9	185.7	228.1	348	220.3	169.7	388	276.2	316.7	348.8	391.9	267.8	240.1	207.3	256.8	297.5	292.1	277.4	419	270.1	334.3	183.8	322.9	397.5	582.5	335.1	530.8	451	385.7	338.3	350.7
214874_at	2464.2	1863.8	1002.3	995.8	1235.9	1615.2	822.5	1048.4	822.3	680.6	1017.4	1557.9	1245	843.3	993	959.5	1121.7	1251.6	838.3	953.9	700.1	497	651.5	609.3	801.1	409.6	596.1	862.6	601	496.8	683.2
214896_at	2105	2354	226.5	1176.9	803.8	1898.1	550.7	852.7	1576.6	429.4	1125.3	2074.5	1245.6	663.1	1225.8	909.1	567.9	1557.9	659.1	577	207.1	355.1	317.4	205.7	806	170.4	209.7	707	477.7	185.1	676
214927_at	71.9	109.8	104.1	156.6	128.8	144	159.7	208.1	331.7	176.1	249.7	154.2	99.5	101	208.1	162.3	213	116.9	199.7	98.7	156.6	197.3	237.2	134.7	430.1	309.5	353.5	235.8	389.6	318.7	256.4
214945_at	1652.8	1703.8	1849.9	1536.4	1211.3	1361.2	1119.7	1328.4	1547.5	1939.5	915.1	1214.1	805.1	595.2	784.4	1451.3	1217.7	2010.3	1120.4	2215.2	2029.7	1216	1377.7	308.7	1219.7	1056.9	730.3	2668.1	568.6	825.8	820.5
214950_at	43.2	12.9	30.1	45.4	23.9	22	43	41.9	57.8	142.1	237.7	28.8	90.6	32.8	157.6	144.6	116.5	54.3	101.9	29.4	46.6	32.3	177.8	108.9	288.9	56.5	164.4	164.5	37	152.2	232.4
214961_at	572.6	676.4	318.8	247.3	305.6	358.4	286.1	296.3	494	299.7	520.7	330	278.4	225.7	341.3	403.7	359	258.8	189.8	505.9	267	165.1	409.9	305.9	194.4	126.6	59.2	300.5	319	181.5	217.5
214964_at	57.4	50.2	147.6	126.2	99.1	52	107.4	21.8	75.8	118	174.5	108.8	40.9	117.6	172.1	46	270.3	88.6	168	148.9	134.8	80.2	80.3	118.5	113.3	108.1	160.5	120.6	246.6	130.9	123.1
215035_at	7.9	11.1	11.3	5.7	6.2	9.1	12.8	9.6	25.6	12.5	11.3	13.9	10.3	12.1	17.2	14.9	43.9	10.1	8	15	4.3	6.6	25.5	13.3	22.9	8.4	21	22.1	25.8	19.4	13
215045_at	689.8	1163.4	666.4	778.7	407.4	622.3	447.5	109.6	799.1	595.8	549.5	812.1	401.7	311.3	556.4	532.1	862.8	1015.6	532.2	363.5	902.7	474.2	767.9	440.6	445.7	355.5	325.7	601.1	433.1	314.5	253.6
215080_s_at	279	267.7	115.9	159.4	140.3	163.7	37.8	148.4	135	123.3	400.7	174.3	111.1	90.8	197.5	103.8	64.9	132.4	20.4	42.5	179.8	76.2	85.6	86	92.4	16.4	14.6	228.8	67.7	62.2	91.7
215090_x_at	495.6	625.1	874.4	663.1	809.9	625.3	869.8	564	598.5	1060.4	645	430.1	629	794.6	592.3	775.4	923.2	713.6	729.4	847.8	658.5	754.4	533.7	928.3	720.1	803.3	902.4	689.1	926.7	1027.8	682.5
215094_at	18.5	5.2	57.9	25.7	38.6	4.2	24.6	62.1	13.4	29.4	12.8	37	16.8	11.5	6	13.2	49.3	43.5	33.4	8	15.3	5.5	83.9	36.1	31.7	50.5	78.1	33.6	34.7	52.8	42.3
215104_at	26.9	168.8	66.5	171	106.1	77.5	35.5	162.4	90.9	141.4	320.4	86.2	74.7	185	112.7	150.5	235.8	184.4	271.4	97.7	141.9	161.5	139.9	359.4	253.1	121.9	220	270	216.4	155.7	155.1
215107_s_at	1.6	2	6.2	2.8	1.3	2.9	2.5	2.9	2.8	5.4	7.7	1	1.7	3.4	4	1.7	4.7	2.5	7.6	12.9	8.4	2.9	2.4	3.3	6.8	4.2	16.8	3.8	2.6	7.1	3.6
215108_x_at	396.6	329.2	220.5	202.9	415.3	235.7	221	332.7	331.7	156.1	192.6	273.6	179.6	223.9	268.6	111.1	205.2	181.6	329.6	151.3	175	113.7	258.4	313.8	326.9	61.5	91.3	146.5	158.4	125.4	117.8
215152_at	6.5	80.6	1.5	2.6	27.8	1.9	6.9	9.1	68.6	71.8	48.2	32.5	6.6	83.7	3	7.4	37.1	6.1	8.5	27.6	58.8	3.1	52.3	17.4	13.9	26.5	119.2	47.5	11.2	61.6	10.5
215160_x_at	352.4	296.6	297.7	269	321.2	285.9	299.7	507.9	389.4	267.5	389.5	315.6	409	277.6	283.9	339.5	203.7	187.7	169.1	216.7	191.9	389	315.6	359.4	266.7	238.9	484.1	282.9	249.3	262.4	260
215161_at	543.9	1031	432.6	428.2	640.3	932	282.9	185.4	267.9	275.7	141.1	809.5	547.8	262	307	224.5	311.1	420.3	246.2	588.9	230.5	19.4	128.3	97.9	93.9	14.9	74.7	35.2	36.2	40.5	273.6
215177_s_at	96.9	18.7	352	214	463.5	329.2	313.5	522.2	437.2	13.3	73.9	265.5	375.3	117.9	333.7	311.5	98.8	198.6	153.2	184.9	321.3	403	38	312.4	104.5	305.5	23.3	144.6	185.2	23.6	270
215225_s_at	149.1	23.5	176.5	455.8	174.7	200.4	333.5	146.2	255.9	128.9	129.1	84	156.2	129.2	299.2	200.4	36.6	211.6	279.3	148.8	270.6	298	220.8	284.7	67.4	145.3	64.2	35.9	42.1	54	150.9
215241_at	3453	2348.6	1362.2	1756.7	2288	2497.4	743.6	1007.4	2049.5	1589.6	1845.4	2632.2	1462.6	1212.2	966.8	3291.6	2051.4	2205.8	925.9	2547.7	1057.7	942.3	1530.8	503.1	1004.2	960.5	572.8	2483.9	374.3	451	231.7
215267_s_at	592.3	854.8	804.8	831.5	782.7	1011.4	402.9	358.8	811.6	692.1	1219.2	1106.9	1108.4	369.6	641.2	538.6	848.4	1136.4	571.1	1028.8	1139.6	677.5	706.9	671.1	512	623.7	380.9	665	642.4	521.1	365.4
215288_at	6.6	13.1	22.3	60.4	11.4	13.6	25.7	12.3	7.2	20.3	10.1	111	13.7	15.9	87.2	8.5	14.3	57.3	12.4	18	8.7	16.7	8.2	90.7	56.2	59.3	75.4	93.2	43.2	22.9	20
215301_at	31.8	21.9	30	30.8	33.7	64.1	37.4	16.5	73.6	123.8	90.9	45.2	41.4	10.7	96.9	32.1	44.1	31.1	53.1	47.8	59.8	47.9	92.2	18.3	134.3	51.9	219.7	210.8	81.4	92.2	47.4
215306_at	120	166.9	83.5	225.5	121	103.3	285.7	273.7	315.6	582.7	127.1	76.5	261.6	129.5	150.3	164.6	552.3	350.6	271.1	164.3	272.9	160.5	309.9	605.6	708.3	727.8	640.3	634.3	729.1	454.8	441.1
215320_at	1.4	2.2	2.4	3	2.1	1.8	3	3.9	4.1	5.6	7.3	3.9	4.6	2.7	4.5	2.1	3.4	1.7	3.8	3	2.8	2.1	3.1	9	58.1	2.9	9.2	57.6	53.8	8.5	21.8
215406_at	11.4	23.3	19.4	14.8	10.3	15.4	15.1	16.4	80.4	4.8	42.3	17.1	42	32.8	24.1	67.4	90.3	67.1	17	89.4	45.1	30.3	21	58.5	21.3	19.8	37.9	28.5	26.7	92	40.3
215425_at	67.8	77	68.3	119.4	95	92.2	100.9	91.7	113.9	122.7	191.6	95.5	89.2	142	123.8	73.3	168.5	89	82.7	132.2	105.8	119.6	179.4	205	206.6	73.5	254.2	204.2	112.7	240.2	135.1
215444_s_at	8.6	12.4	51.7	13.5	9.1	9.2	16.9	37.3	13.4	53.3	53.2	9.2	10.4	16.7	34.1	27.2	23.9	12.9	17.1	24.1	33.1	7.2	34.9	19.5	44.7	27.2	24.4	36.5	20	27.7	56.9
215467_x_at	261.6	253.6	196.1	191.1	238.9	177.6	631.1	292.4	337	331.1	731.5	445.3	303.8	229.8	321.2	307.2	405.9	407.8	274	373.6	228	331.3	360	315.4	588.6	196.7	993.6	626.3	355	760.2	362.9
215489_x_at	764.8	392.5	285.4	446	359.3	437.2	535.5	514.6	298.3	685.5	524.6	338.3	387	333	469.7	422.7	464.6	436	343.3	369	322.7	445.6	406.9	436.2	562.8	466.4	763.2	1186.5	487.9	713.6	791.6
215492_x_at	108.5	247.1	403.2	641.3	440	341.3	586.7	637.6	373.4	772.2	1278.2	476.6	280.9	591.9	414.7	1091.3	701.4	509	278.7	479.3	472.9	592.7	344.4	538	489.3	587.4	1587.8	634.4	840.4	559.8	507.9
215498_s_at	127.9	162.4	221.7	461.5	185.8	142.3	209.2	310.9	297.8	188.2	347	166.4	174.7	213.4	311.4	275.9	419.2	247.8	460.3	334.1	251.8	257.8	180.9	399.2	258.2	419.9	476.7	355.9	431.9	329.2	350.8
215522_at	425	429	363	221.7	273.7	446.9	211.4	270.7	223.2	300.2	161.2	452.3	249.7	170.6	196.4	291.7	183	284.3	276.9	426.7	396.9	141.9	203.1	147.1	147.7	105.8	123.8	299.7	162.8	133.7	84.3
215536_at	103.8	80.5	113.4	82.6	98.9	66.4	130.3	27.3	81.1	157.9	45.8	68.6	63.7	105.6	51.2	93.9	104.7	30.1	137.1	60.1	63.3	31.4	29.4	91	115	69.8	170.1	130.5	132.7	168.7	116.6
215548_s_at	814.6	610.9	749.4	622.5	484.9	776	539.6	536.5	415.1	594.7	507.2	651.2	721.1	705.5	537.3	635.8	609.6	671.3	590.8	743	521.7	651.4	499.4	625.2	430.9	475.3	247.8	414.6	368.2	517.6	532.5
215572_at	6.1	9.1	24	11.4	8.4	8.1	6.2	6.1	67.3	68.5	21.6	9.2	38	11.4	71.3	23.7	19.5	28.8	157.9	13.5	18.9	26.2	21.8	23.5	9.4	11.1	32.7	159.1	76.8	18.2	16.3
215594_at	35.9	147.9	30.7	28.9	24.8	20.8	12.5	27.7	158.6	53	70.9	98.7	49.9	34.4	113.1	35.8	53.3	32.2	41.6	59.5	103.8	21.7	50.8	102.4	46	137.5	143.7	50.3	56.1	150	38.3
215618_at	17.1	45.1	13.8	40.7	31.4	43	45.5	27.9	34.3	23.6	88.6	67.6	20.8	130	74.6	30.8	22.4	102.7	25	35.1	98.9	17.3	40.3	173.5	56.1	69.4	82.4	55.5	31.4	51.6	40.9
215656_at	35.1	8.2	8.8	6.5	6.2	26.3	10	16.5	3.4	9.9	15.7	33.8	5.8	9.3	30.6	14.3	12.7	24.5	8.8	11.1	25.9	5.7	48.2	73	11.7	34.9	17.4	65.8	11.3	106.5	38.3
215674_at	14	60.9	18.8	13.8	3.9	3.5	52.8	61.1	3.2	48.4	118.8	1.6	1.5	23.7	43.7	53.3	30.2	19.3	53	23.3	34.5	3.3	31.4	3.8	86	28.7	75.2	59.4	36.6	44.3	39
215685_s_at	141.4	169.7	129.4	138.6	133.2	141.6	190.6	207	105.6	201.2	643.9	62.9	174.4	154.6	137	111.5	171.3	206.3	120.4	90	113.4	61.6	100	79.4	30.7	55.6	109	438.8	83.7	123.5	107.2
215691_x_at	1458.6	1201.4	1187.4	1039.1	977.3	1243.7	735.6	822.8	874.9	1037.1	822.7	752.1	919.3	797.3	895.5	920.2	821.7	1058.1	991	955.7	738.6	993.8	856.4	499.3	899.8	715	321.4	816.8	681.3	764.5	814.4
215699_x_at	65.7	207.6	267	219.4	124.6	224	342.3	224.5	225.7	457.5	407.4	94.2	46.9	272.1	207.7	268.1	273.4	227.8	307	365.6	174.9	272.6	301.9	306.2	317.2	288.2	731.5	273.2	334.1	332.4	189.5
215725_at	38.1	52	26.4	20.5	142.1	35.7	36.2	37.3	69	39.4	158	69.3	199	63.9	66.3	27.4	154.6	68.7	46.8	33.6	51.6	32.4	37.4	36.9	62.3	76.6	143.1	133.4	47.1	108.2	144.1
215735_s_at	159.2	124.6	512.9	378.7	380.7	454.9	352.6	368.5	350.7	120.7	238.5	650.5	367.9	591.4	203.8	295	324.2	517.2	364	477.4	238.1	361.7	333.9	388.2	131.3	332.8	140.7	295.4	240.9	38.3	349.3
215769_at	69.7	73.1	102.8	102.5	52.3	67.1	101.5	93.1	46.4	112.9	236.5	71.6	98.6	124.7	84.8	122.8	130.5	122.3	38	100.5	81.1	75.2	114.2	50.5	227.1	92.6	263.1	166	146.9	235	109.6
215770_at	52.3	32.4	32.2	58.1	32.7	12.4	53.1	57	73.4	14	36.7	8.3	49.9	39.3	37.3	25.6	60.4	18.9	11.2	79	12.1	21	114.6	21.9	146.4	27	88.9	66.2	61.7	121.9	86.7
215790_at	11.1	12.4	8.1	15.4	11.4	17.9	19.2	18.1	15.9	12.9	23.7	12.1	31.7	5.4	18	19.1	22.5	9.9	28.3	7.6	15.4	9	17.5	9.7	30.5	26.9	29.3	26.7	20.9	38.7	15.1
215794_x_at	772.5	343.9	973	334.3	1024.3	984.5	747.2	1011.4	766.6	303.3	563.8	733.2	987.2	621	1027.4	565.2	360	597.7	589.3	556.5	568.7	1022.6	461.6	574.5	297.4	509.2	474.6	519.1	455.4	523.5	486.4
215838_at	64.9	32.2	57.9	101.5	41.9	33.6	48.1	127.9	162.8	54.1	163.7	7.6	111.7	91	98	138.8	107.5	79.9	134.3	117.6	25.9	82.6	109.7	94.3	145.4	73.5	176.2	162.2	91.2	189.4	77.9
215842_s_at	23.8	14.5	62.4	16.9	12.6	15.4	11.8	14.2	28.9	107.9	96.4	19.4	80.4	46.1	63.7	68.9	67.2	120.4	72.9	120.1	49.2	19.1	68.3	112.6	18.8	41.2	34.5	86.6	73.9	165.6	47.7
215870_s_at	154.4	98.5	22.9	155.4	62.2	85.1	22	193.6	72	94.8	248.5	15.3	32.6	64	189.7	32.2	263.8	244.8	218.7	31.9	217	244.6	53.8	34.5	254.6	180.1	186.7	163.3	317.5	254.2	92.5
215908_at	23.4	63	22.8	29.2	51.1	59.5	15.1	26.7	14.5	43.6	188.5	47.2	75.7	49.9	30	59.2	112.4	72.9	88.7	119	77.4	56.1	40	110.7	37.9	113.9	61.9	34.1	123.6	57.9	52
215917_at	2.2	5.1	6.8	9.6	4.2	17.7	2.4	5.6	5.5	8	22.5	4.5	26.7	27.4	6.7	24.9	34.9	17.3	10.3	3.9	43.5	3.2	6.9	2	42.6	4.6	128.9	86.2	57.4	69.8	48.9
215919_s_at	96.2	73.6	66.3	88.5	77.3	53.8	94.7	81.3	77.9	141.2	202	129.8	65.6	56.1	45.8	74.2	131.3	94	152.5	83.2	86.7	52.6	127.4	88.2	149.6	60.9	150.5	103	172.3	98.5	122.4
215925_s_at	45.4	10.5	19.6	16	5.9	14.4	8.9	23.7	100.1	80.8	51.6	64.3	31.3	31.1	35.2	9.5	54.9	21.7	114.1	92.7	16.2	84.2	19.4	40.8	27.4	43.9	137.5	34.7	25.4	24.9	50.3
215972_at	505	134.8	299.3	54.5	182.2	193.7	221.2	159.2	197.2	218.6	428.2	84.8	156.5	152.2	45.1	194.4	123.6	254	113.8	422.4	28.4	85.1	39.6	42.6	190.2	10.6	84.2	75.2	57.3	39.5	35.9
216019_x_at	40.6	38.2	51.5	39.7	65.5	45.7	58.4	57.4	72.2	69.5	123.3	50.2	61.2	76	72.2	40.9	432.1	87.9	161.8	34.7	40.9	54.4	51.6	134	70.9	93.9	134.4	38.9	141.2	87.3	90.1
216020_at	4.8	6.4	5.2	2.9	5.1	9.5	9.1	10.6	3.9	11.6	129.6	9	2.4	24.6	3.6	8.4	6.6	4.5	6.6	10.4	32.2	4.5	7.7	11.8	39.1	6	16.7	85.6	5.5	15.4	28.2
216021_s_at	19.3	114.7	52.1	113.5	10.3	47.4	68.4	14.6	177.7	71	16.2	83.9	71.8	21.2	22.3	83.6	63	59.9	219.9	123	15.5	60.4	55.8	88.8	234.2	74.4	135.1	145.1	88.4	177.7	86
216023_at	10.5	23	9.1	22.5	14.8	9.4	8.9	25.1	30.6	17.4	34.2	12.8	13.5	29.7	6.2	10.9	23	23.2	25.5	11.8	26	11.9	23.2	19.5	40.8	11.4	91.6	37.2	40.9	28.7	25.2
216056_at	48.5	75	12.9	10.1	141	5.8	21.8	176.6	19.3	113.4	59.1	8.2	54.1	52.9	86.5	93.2	22.4	66.8	19	117.3	80.6	9.8	68.5	20.3	258.9	143.7	122.3	89.3	121.8	76.5	104.4
216059_at	14.6	12.6	16.9	9.1	10.7	10.5	13.7	47.7	23.2	16.1	52.2	20.8	30.6	14.8	73.1	27.3	20.7	22.6	98.7	27.4	75.3	15.8	32.1	19.1	66	83.4	29	29	26.3	94.2	34.7
216073_at	411.5	375.2	356.5	157.8	340.6	302.7	206.2	115.8	228.3	366.9	124.4	258.6	109.7	195.1	112.5	483.4	210.1	235.2	279.8	278.3	160.9	96.4	189	107.2	148.4	156.2	123.7	106	85	204.3	98.7
216093_at	29.1	12.1	66.4	110.1	19	11.9	106.9	3.1	27.4	109.1	178.2	65.4	21.3	72.4	69.4	74.2	50.4	74.4	138.8	13.4	71.4	60.8	149.8	121	73.9	37.6	146.7	42.5	176.1	82	86.9
216096_s_at	322.7	147.7	414.2	156.7	276.8	380.6	176.4	389	282.2	144.9	117.4	236.6	211.4	150.5	174.3	253.4	82	190	151.8	222.4	201.9	202.2	182.2	185.3	186.1	139.8	87.2	179.5	166.3	207.7	265
216101_at	55.2	149	52.3	77.4	70.3	57.2	234.5	105.4	251.2	166.1	196.1	150.6	185.1	142.7	268.3	189.5	145.2	119.7	280.8	154.6	179.6	121.3	226.3	263.5	283	153.4	288.9	330.4	352.7	198.5	177.5
216120_s_at	244.5	336.8	370.6	222.9	264.1	308.1	121.6	232.6	311	233.1	175	326.4	193.4	155.3	225.7	310.4	332.4	284.5	303.6	303.1	307.2	198.7	227.7	181.8	87.6	173.9	122.7	213	114.1	244.5	154.1
216121_at	67.6	31.4	46.3	54.4	58.8	34	108.6	93.6	56.5	105.2	60	62.1	31	27.3	67.7	81.8	148.9	46.9	148.1	69.8	64.5	20.4	41.3	163.4	97.4	71.8	162.1	161.6	69.6	194	73.8
216158_at	11.5	124.5	12.5	38.1	3.7	8.2	11.7	20.7	6.6	13.4	16.7	30.8	3.9	27.4	32.4	15.5	5.3	5.5	11.7	11.8	8.9	54.2	9.3	13.1	71.5	17.5	77.3	72	34.1	21.5	33
216178_x_at	42.9	55.4	38.7	7.3	50.6	6.6	45.6	36.6	8.4	19.2	19.1	56.5	7	10.3	7.2	20.2	31.5	45.3	30.6	39.1	39.9	53.7	106.5	5.8	7.8	60.6	56.6	69.3	92.2	108.2	83.9
216190_x_at	23.7	51.8	52.5	30.3	32.4	52.5	35.3	26.4	47.4	11.8	6.6	63.8	20.7	3.5	61.6	34.9	6.5	29	9.7	25.2	25.6	27.5	12.3	73.6	10	18.2	20.5	20.5	36.4	9.8	4.4
216289_at	11	33.1	9.5	87.6	18	10	10.4	17	25.7	22	98.5	19.5	28.8	22.4	45	15.3	59.3	38.4	24.1	10.8	16.8	21.6	41	109.4	23.2	37.5	24.7	19.6	85	20.9	36.1
216293_at	34.9	38.7	33.8	92.7	35.9	53.2	45.9	27.6	59.6	70.8	139.1	30.5	96.2	90.6	84.7	47.4	79	63.2	33.8	51.2	89.5	44.5	66.6	91.8	134.9	61.6	122.3	212.3	97.5	102	71.1
216327_s_at	54.1	69.1	38.8	15	15.2	28	53.8	84.2	127.4	16.7	40.3	96.6	92.3	22.5	26.7	114.6	74.6	109.8	44	16	37.1	50.5	88.4	72.6	18.4	13.8	22.2	21	21.7	26.8	11.7
216333_x_at	80.1	287.4	152.2	179.9	100.6	188.1	255.3	109.2	116.3	314	256.1	124.8	67.9	140.9	374.6	370.9	426.1	256.9	587.5	420.9	331.3	390.6	653.8	538.4	417.9	273.8	602.6	350.8	282.6	141.1	255.5
216338_s_at	521.4	343.6	433.4	389	504.3	438.5	359.8	415.3	48.7	271.2	215.9	448.5	212.5	456.8	358.8	235.4	258.7	382.9	200.7	423.7	392.4	284.6	433.7	280.9	187.1	510.5	314.6	268.1	174.8	211	329.5
216362_at	26.3	12.4	14.8	63.7	11.2	11	8.5	16.8	96.9	24.5	76.9	4.3	58	14.7	19.1	53.2	60.1	16	81.4	19.6	61.4	28.2	60.3	16.5	43.2	23.6	70.9	25.3	81	17.5	34.9
216364_s_at	17.2	7.1	14.4	16.5	27.6	16.5	16.3	8.9	12.5	14.3	39.9	27.5	34.5	7	23.1	22.4	37.3	6.9	10.3	14.7	61.7	10.6	16.2	27.3	33.3	45.3	189.4	35.7	20.1	110	27.4
216394_x_at	72.7	14.4	25.1	28.9	22.2	19.4	23.9	27	84.1	30.3	79.1	25.8	21.3	44	23.1	13.9	68.5	19.6	46.5	75.3	25.1	22	34.2	55.8	156	44.4	186.5	176.8	119.5	36.8	65.3
216428_x_at	28	67	126.4	273	119.6	107.6	23.1	174.2	168.1	376.4	256.4	127.9	109.2	173.1	151.5	304.5	153.8	192.8	139.1	89	150.2	80.6	230.2	92.7	280.1	171.7	423.8	398.2	246.4	456.7	169
216442_x_at	2941.7	2233.1	780.4	1424.6	2286.8	2219.5	1355.6	1522.5	1703.9	1376.4	1231.6	1297.9	1320.7	2462	1347	4031.9	1166.2	2267.7	1674.5	1516.1	1598.8	1850.2	1373.8	2024.6	1047.7	1416.3	579.4	1143.4	868.6	1308.6	669.1
216445_at	16.1	27.1	18.7	25.9	16.5	20.3	28.1	21.7	21.7	64.4	49.5	17	66.1	22.9	32.4	32	17.7	14.7	136.4	29.9	26.8	18.6	15.7	17	25.2	13.9	42.1	34.8	42	62.1	77
216465_at	11.7	83.4	11.7	52.7	60.3	58.6	13.5	20.9	153.6	63.9	315.5	67.4	85.3	32.1	71.2	58.4	159.2	114.8	114.7	90.3	196.1	145.8	69.3	79.3	107.5	15.6	136.7	137.9	365.4	178.8	179.2
216481_at	411	373	431.7	421	378.9	381.2	533.9	406.9	393.9	592.1	570.7	248.4	415.9	323	250.7	484.5	580.2	344.5	268.2	291.2	219.2	304.6	294.1	254.8	460.3	199.2	207.2	183.8	365.2	466.8	271
216489_at	111.2	112	81.8	83.9	57.4	87.9	123.3	155.1	136	133.9	30	110.6	149.2	98.7	118.7	122.9	107.6	105.1	16.3	99.7	96.4	50.7	93.2	137.1	243.8	81.3	178.4	167.2	167.2	92.9	165.6
216534_at	17.1	19	15.5	15.1	17	41	20	24.3	38.8	21	51.8	31.7	27	20.5	115.3	34.8	110.8	49	13.4	46.2	11.8	25	27.9	27.1	26.1	79.4	53.3	33.7	25.2	39.5	74.6
216539_at	49.2	53.6	78.2	15	86.6	55.6	96.3	123.3	191.4	82.7	237.2	58.8	78	62.3	99.8	55.1	156.4	31.9	80.8	93.4	102.6	74.7	91	176.3	195.9	131.3	310	268.3	145.1	244.3	71.1
216578_at	18.4	21	19.7	20.9	17.6	17.9	21.3	13.5	40.7	36.7	81.8	32.4	25.5	18.7	18.9	26.7	36.7	19.4	20.1	22.1	17.9	12.1	34.1	33.6	41.5	22.9	92.6	22.1	35.9	54.4	26.9
216597_at	20.3	18.2	12.9	29.6	17.7	31.7	19.5	13.5	147.5	40.7	45.7	67.4	44	33.8	122.7	131.3	50.5	9.4	60	17.1	111.7	70.9	23.1	95.4	102.3	103.5	46	39.5	22.9	25	64.1
216599_x_at	7.8	10.8	5.1	8.7	12.4	6	11.7	7.4	36.8	8	24.3	4.6	8.7	19.1	16.5	9.5	18.8	16.2	16.6	19.3	15.3	17.7	11.1	10.7	24	13.5	25.1	18.2	22.6	13	12.2
216623_x_at	418.1	363.8	315.6	219.6	371.9	251.6	298.3	333.2	303.7	276.5	165.5	325.4	308.6	319.2	199.1	261.1	282.3	208.2	252.6	182.4	251.6	154.3	391.7	222.1	378.2	248	114	203	147.8	206.9	125.4
216626_at	100.1	56.8	105.1	14.3	18.2	36	174.5	35.7	20.6	94.8	257.1	44.6	86.9	28.6	56	82.2	105.1	57.2	69	8.7	84.4	9.4	108.9	56.3	110.8	60.4	174.4	56.9	117.7	65.7	58.6
216667_at	48.7	33.5	15.2	113.7	44.2	68.5	84.7	22.5	19.9	26.7	142	67.8	26.6	83.5	39.5	145.4	55.5	52	134	59	92.1	86	154.5	22.7	193.7	94.8	52.2	253.3	65.7	213.3	113.9
216695_s_at	22.6	14.7	12.1	69.1	77.1	12.9	7.8	6.7	15.8	9.1	35.2	51	34.5	14.3	14.6	9.5	9.9	12.5	28	35.4	8.1	28	5.9	9	45.2	58.8	15.9	20.7	23.4	28	19.4
216698_x_at	288.3	305.1	241.2	407.3	212.9	298.6	311.1	321.7	144.7	398	396	211.8	339.8	394	236.1	440.5	583.1	437.6	206.9	294.2	497.6	414.4	315.2	303.9	565.6	337	924.3	389.5	781.9	626.6	301.7
216702_x_at	18.9	103.5	179.3	191.6	123.9	71	178.2	38	541.7	195.3	182.1	141.9	226.4	208.1	273.9	317.5	359.4	171.2	262.8	86	275.2	235.5	247.4	271.2	237.1	47.9	450	386.6	257.8	273.6	246.6
216707_at	5.1	5.6	4	5.4	4.6	5.8	7.3	5.5	8.8	6.4	15.7	3.8	5.1	5.1	6.6	7.1	6.1	6.4	7.3	6.3	7.2	5.4	7.8	8.2	8.3	11.1	15.4	9.2	7.6	12.3	4.9
216752_at	2.5	6	2.3	14.7	7.4	7.2	5.5	38	3	32.4	14.8	3.3	2.1	33	42.3	36	20.4	26.6	36.9	5.5	12.3	3.7	49.9	51.7	32.8	18.2	48.2	51.1	20.9	7.8	9
216778_s_at	14.3	9.8	31.1	30.3	28.1	7.6	36.3	12.6	37.7	29.3	34.2	19.2	20.5	17.9	29.4	53.2	7.6	7.8	14.7	62.8	34.8	31.2	31.5	8.1	123.1	32.4	115.1	69.4	48	75.5	59.3
216783_at	42.1	100.4	55.6	93	74.5	90.7	61.3	23.2	103.6	80.3	150.2	62.4	85.9	127.6	99.2	97	79.2	72.3	96.3	54.5	114.6	74.9	39.5	81.5	77.4	18.4	115.4	197	119.1	220.4	104.2
216790_at	4.3	9.2	6.2	4.4	4.2	5.4	18.7	6.1	5.7	8.1	13.6	4.1	4.5	5.7	6	11.4	8.9	5.2	4	18.5	4.8	4.3	38.8	8.1	8.1	7.6	38.5	10.2	6.8	10.2	7.1
216793_x_at	47.2	18.9	18.5	91.8	17.7	9.5	14.2	52.3	29.1	68.7	162.3	30.4	22.5	38.1	15.9	22.9	35.2	12.8	83.9	5.4	20.8	68.1	26.8	18.9	101.1	38.2	49.9	95.5	72	41.6	36.1
216809_at	86	77.1	116.4	101.7	73.7	92.3	161.2	93.6	154.6	156	313.8	90.5	190.5	86.2	110.6	131.9	120.9	143.3	193.2	136.1	179.2	116.3	147.7	175.2	249.3	147.7	349.6	281.8	175.9	302.2	164.5
216811_at	20.1	18.3	8.7	32.4	31.8	21.5	21	70.6	28.2	98.8	50	18.9	70.6	31.3	20.9	23.3	178	24.4	137.7	74.1	18.1	19.3	31.9	30.6	199.2	11	43.6	32.9	183.5	38.8	85.1
216818_s_at	9.5	18.9	46.4	20.3	12.4	16.4	35.4	77.5	15	14.5	29.1	6.2	14.2	16.5	7	25	21.6	12.9	13.6	21.2	12.8	38.8	14.3	56.6	22.3	68.8	65.3	22	25.6	21.3	74.7
216916_s_at	15.8	9.9	12.3	15	10.2	11.9	17	13.4	21.6	14.3	55.2	11.9	18.8	15.5	20	33.5	26.8	17.9	28.7	35.4	17.4	23.9	36.9	45.8	57.7	15.2	63.5	23.5	16.9	22.5	24.4
216930_at	64	111.5	102	22.8	87.3	107.6	139.7	66.8	99.4	63.2	263.2	93.9	55.3	80.7	140.6	145.4	66.6	12.1	87.9	91.6	88.2	41.7	119.8	99.5	136.7	61.5	277.2	210.9	125.2	161.4	116
216935_at	15.3	18.4	16.7	40.2	9.2	12.4	6	30.1	119.5	83.8	129.7	14.8	68.3	65.7	80.7	22.6	25.3	41.4	29	63.7	19.1	14.8	27.6	94.8	135.1	38.2	157.9	40.1	87.1	46.6	19.5
216962_at	40.8	15.7	3.9	20	10.7	18.2	15.2	13.2	22.3	17.5	98	35.6	26.4	12.2	18.1	114.4	16.1	6.6	17.8	21.4	21.8	14.1	49.6	16.3	22.5	18.4	30.3	190.2	23.5	24.5	19.2
216968_at	28.4	131.9	77.9	286	120.5	32.6	84.3	113.3	241.6	134.6	341.2	28	101.9	31.9	52	144.6	234.3	152.4	142.9	141.1	129.5	73.5	117	107.8	65.4	25.8	77.6	81.3	27.1	64.2	51
216974_at	2.5	4.2	0.9	1.6	1	3.5	2.3	7.2	68.5	2.2	7.2	1.3	0.9	1.9	2	5.2	1.2	1.7	2.3	3.8	0.8	28.3	2.1	1.1	7.6	4.7	88.9	83.8	7.9	6.2	5.1
216975_x_at	102.2	190.7	68.5	32.8	35.5	26.6	65.7	80.7	27.5	79.8	15	73.6	22.8	12	21.5	36.4	47	21.6	100.4	88.5	58.7	15.7	51	19.6	13.7	5.3	58.4	228	17.5	15.6	19.3
216994_s_at	68.8	87.2	102.5	76.7	87.1	78.1	192.9	65	169.9	194.3	99.7	62.6	145.7	82.1	182.4	188.6	92.7	110.9	70.4	204.7	126.4	74.9	81.2	210.9	293.7	105.1	317.8	180.4	144.8	119.7	104.3
217016_x_at	69	65.4	72.5	122.2	130	75.9	107.6	118.2	170.7	153.5	380.5	108.9	126.7	68.3	139.1	190.1	274.5	139.3	215.8	81.1	181.7	133.2	162.7	250.9	268.7	166.7	195.2	240.5	141.3	243.9	82.3
217033_x_at	624	1394.6	795.9	945.3	722.6	748.3	878.1	781.7	954.2	897.2	1447.6	862.9	498	792.1	896.4	884.8	1011.5	1011.9	1432.7	1074	968.3	755.4	1236.2	740.3	1025.5	1039.5	1577.9	1232.8	1071.3	1066.8	673.8
217086_at	4.2	3.3	2	6.3	4.4	3.3	3.2	9.2	4.4	4.1	11.1	1.9	2.4	3	17.7	2.7	4.2	5.6	12.6	4.8	3.2	10.3	84.7	16.7	11.2	2.9	6.4	28.3	22.2	63.9	7.6
217107_at	15.1	55.4	91.1	82.7	14.7	26.7	112.8	106.3	143.2	141.2	114.3	52	137.6	64.9	88.7	28.4	96.9	84.4	81.6	94.8	98.5	89.4	126	121.9	167.5	117.2	144.4	88.3	123.2	137.9	135.7
217121_at	14	142.5	84.2	15.3	28.6	72.6	40.4	95.2	105	33.9	250.1	98.6	88	30.3	164.4	119	40.8	31.5	37.9	64.9	98.4	13.9	12.4	29.6	204.5	112.5	47.3	363.8	133.7	240.1	153.5
217136_at	50.1	37.6	33.5	7.3	21.2	25.1	0.9	80.4	70.9	12.2	72.8	44.3	51	14.2	18.7	18.1	29.5	31.1	83.8	40.5	17	3.5	9.8	25.9	154.1	37.9	99.1	77.1	147	98.1	43.6
217158_at	46.1	26.3	20.1	20.1	65.9	20.7	68.5	42	86.3	87.4	97	57.2	80.6	100.1	93.9	184.9	100.3	55.1	156.3	103.1	126.2	81.1	60.2	298	183.1	32.5	105.4	87.2	172.9	95.5	113
217177_s_at	30.4	25.4	66	33.5	64.4	58	140	83.7	49	152.4	91.5	67.6	58	81.4	64.4	90.4	48.1	83.2	60.2	77.1	150.7	55.7	74.8	168.2	103	93	244.3	168.3	84.8	140	56.8
217188_s_at	158.1	41.1	314.6	219.3	281.8	367.1	261.1	374.6	155.4	103.2	24.4	269.3	77.7	314.3	79.3	149.4	34.1	291.1	47.9	227.2	186.9	326.8	156.5	116.3	16.2	260.6	26.2	30.2	56.8	30.6	36.8
217190_x_at	8.2	5.5	10.5	9.6	6.7	8.2	15.5	11.4	17.9	14.6	200	14.8	47	11.9	4.8	21.6	31.6	19.3	11.1	8.8	17.2	20.4	20.8	11.5	16.4	12.5	30.1	35.8	16.3	21.9	15.7
217202_s_at	335	528.5	3496.8	1243.9	1898	2245.4	1839.8	3081.2	1956.9	1008.6	1136.1	1317.2	1821.6	1673.7	1406.2	2067	772.9	1320	1171.1	1556.1	1866	1442.9	1306.5	1408.6	495.4	1428.1	1817.4	784	1315.5	864.3	1322.4
217208_s_at	244	91.3	125.2	120.4	111.2	101.6	197.6	132.8	52.6	208.2	286.8	124.2	164.2	275.9	141.2	88.2	223.1	118.4	230.7	87.6	120.9	185.6	218.1	228.8	480.8	177.8	228.5	320.6	180.6	204	145
217212_s_at	61.9	84.8	78.8	100.7	59.3	75.5	48.1	99.9	101.5	85.9	131.2	94	61	71.2	85.2	96.7	159.1	146.9	58.2	65.1	100.1	130.8	106.7	124.1	249.6	59.7	249.7	156.3	125.7	154.2	115.8
217214_s_at	40.7	24.9	63.9	67.9	17.4	70.4	124.8	38.8	42	85.3	200	28.2	58.4	12.9	84.6	141.2	25.7	50.5	26.5	106.1	73.8	62.5	74.4	11.3	178.3	58.1	89.9	130.1	141.6	136.1	73.6
217232_x_at	3481.2	324.6	2571.5	790.4	2407.4	5184.2	1085.1	8500.4	4001.6	2669.9	2043.1	2716.9	8341.5	6425.4	8100.2	1397	1349.6	2246.9	1063.2	2257.6	4268.5	1982.1	5726	14071.9	634.5	1234.5	1216.3	723.6	715.9	1202.4	1189.1
217237_at	8	2.8	7.4	4	3.8	4.2	9.6	3.4	8	2	32	13.8	10.2	4.3	8.3	8.8	23.8	3.2	2.5	11.9	5.3	2.6	4.2	4	14.3	4	23.3	86.7	16	17.5	12.6
217238_s_at	2.9	9.7	5	50	11.2	9.9	8.4	13	36.9	13.5	17.7	19.3	11.9	25.9	7.5	112.7	6.4	27.3	37.1	55.9	10.4	19.5	13.1	17.2	12.5	12	169	65.6	90	99.1	52.2
217249_x_at	1520.5	1239.3	1163.2	1604.6	1495.7	1877.9	1501.7	1222.9	1079.8	1379.1	1018.8	2322	1875.6	1579.8	1280.4	1728.8	1208.4	1333.7	914.2	1569.9	1098.4	1039.6	1145.9	1552.3	1001.5	652.2	939.3	1078	1044.1	810.5	1185.3
217268_at	0.7	4.4	12.9	5.3	9.4	7.6	15.8	6.8	65.7	16.5	185.1	12.3	11.9	4.7	24.3	7.2	28.9	16.5	3.6	4.6	21.8	44.2	67.9	114.8	81.6	6.6	83.1	67.6	29.9	77.9	26.6
217276_x_at	17.2	21.6	23.8	28.4	28.2	19.8	29.2	39.2	18.3	61.9	54.7	21.3	30.4	75	11.7	137.4	29.5	28.9	19.5	35.5	44.1	17.9	27.8	26.3	76.7	151.9	72.2	33.6	43.7	57.7	21.3
217280_x_at	460.1	189.4	228.5	91.8	204.7	188.7	167.1	266.5	111.4	304	358.4	228.5	135.8	94.7	137.2	164.6	150.1	126.1	161.8	33.3	292.7	154.5	118.3	285.8	204.8	235.7	556.6	412.5	210	304.5	212.2
217346_at	168.2	182.3	211.1	160.6	145.8	226.5	150.2	152.8	301.7	145.8	46.7	176.3	173.7	128.1	221.5	246.1	194.7	161.4	143.7	236.7	155	206.2	264.3	139.4	24	100.6	102	60.2	154.4	108.4	202.5
217350_at	4.9	11.3	12.6	7.9	7.4	51.7	9	9	8.9	15.4	29	17.3	13.3	12.3	7.9	10.6	12.3	19.3	10.9	42.6	21.7	11.1	7.5	25	18.4	10.4	42.1	203.8	21.9	10.5	15.8
217357_at	109.7	23.1	11	9.1	10.7	12.4	22	93.9	17.9	129.6	147.4	69.9	13.8	16	35.4	88.6	20.3	138.4	23.6	40.9	14.9	15.8	95.2	26.8	122.3	54.5	36.2	35.6	29.6	22.7	27.8
217367_s_at	429.6	669.4	519.3	488.2	355.3	344.9	757	433.5	599.7	627.7	601.1	431.3	557.9	576.7	837.4	516.1	931.8	540.3	1049.7	732.8	698	779.4	656.2	703	852	752.1	1144.2	774.9	1221.6	733.9	911.9
217380_s_at	23.3	39	43.2	12.7	27.3	6.6	37.6	64	142.5	71.6	154	89.6	113.6	7.4	165.4	25.7	78.5	54.3	53.9	32.7	62.6	205.2	89.3	144.4	255.6	45.4	117.7	206.3	109.5	114.5	68.6
217392_at	6.9	8.4	6.9	2.4	3.7	17.7	7.5	6.2	6.6	6.8	115	2.7	5.9	2.8	32.1	3.6	9.3	4.6	8.2	12.6	12.4	6.4	8.4	4.4	18.4	12	35.3	16.5	82.9	14.6	40.6
217450_at	25.1	112.7	112.8	126.4	48	35.5	190.8	22.7	76.2	106.8	401.6	137.6	124.2	22.1	122	159.2	193.3	26	229.3	131	53.5	22.9	157.5	40.2	174.4	140	369.9	162.3	162	265.6	148.7
217462_at	6.4	4.6	4.6	3.2	4.2	4.9	4.9	14.5	5.4	22.7	172.3	3	19.2	3.8	31.8	13.8	20.8	67.5	15	7.4	9.8	5.2	12.9	17.6	17.4	28.6	34.2	9.9	7.5	24.3	6.5
217467_at	15.8	11.3	35.5	32.7	16.7	15.7	135.2	17.9	38.1	45.4	216.1	45.5	97.4	62.5	60.7	35.1	14.6	17.7	20.7	70	86.1	58.7	34.6	129.4	61.8	38.5	221	115.8	97.7	125.3	55.1
217468_at	13.1	11	17.1	46.9	7.8	10.9	15.6	24.4	33.5	9.9	68.5	52.6	17.7	14.4	23.1	126.7	20.3	37.7	115.4	61.5	113	73.2	26.8	27.6	24.1	24.4	87.8	81	31.4	88.6	56.4
217483_at	117.9	27.3	51.1	36.5	52.1	34.4	188.1	49.9	59.6	97.3	97.1	58.8	80.7	44.3	217	36.4	43.5	107.5	188.4	59.1	142.5	55.8	150.8	94.8	175.8	120.2	138.6	147.3	175.2	273.8	177.6
217486_s_at	20.4	40.3	14	40.4	12.1	24.5	16.8	20.7	29	53.5	198.1	27.4	25.8	25.2	31.1	123.7	83	34.9	15.6	75.7	70.5	127.5	57.8	105.4	43.3	26.3	69.9	32.7	27.7	111.5	50.2
217507_at	84.5	29.8	36.6	49.5	66.9	38.3	113.7	131.9	23	126.4	185	160.8	67.1	11.7	53.7	14.6	294.3	24.9	25.9	15.9	66.4	51.2	65.7	12	84.7	91.9	252.8	102.4	170.9	399.8	171.1
217523_at	36.6	44.2	35.2	92.6	99.8	28.5	164.2	153.2	180.6	58.4	59.6	120.1	145.5	41.7	75.9	80.3	212.3	59.9	196.2	76.8	174.6	200.9	70.9	136.8	246.7	482.8	17.6	123.4	280.5	529.2	300.1
217526_at	528.2	652	558.3	614.5	445.8	511.6	614.5	509.6	595.5	924.1	1026.4	629.7	563.6	728	511	648.3	948.6	614.2	942.1	712.2	600.9	606.2	584.3	694.8	794.7	353.7	962	788.8	812.9	712.1	745.7
217530_at	27.1	112.9	17.1	20.4	15.6	19.9	28.5	28.4	127.9	42.1	291.6	73.8	13.7	19.8	70.9	79.7	24.8	84.5	29.8	88.9	32.9	26.6	81.9	48	35.2	83.1	65.6	55.9	168.7	162.6	55.6
217536_x_at	9.6	89.2	33.4	35.8	2.6	27	24.6	11.4	3.2	5.4	271.8	2	17.3	27.2	68.8	6.5	130.9	74.7	137.8	60.7	35.3	29.1	98.7	82.5	76.4	122.3	307.2	73.8	76.2	51.6	30.5
217608_at	66.3	79.1	86.3	58.3	56.4	71.2	71.6	31.9	94.3	72	18	86	95	72.1	54	42.5	66.4	55.4	48.6	101.8	60.6	143.3	79.8	137.9	176	73.1	149.2	121.9	123.1	113.5	98
217622_at	78.7	134.7	103.8	229.3	81.1	114.9	155.4	153.2	134.5	128.1	538	55	85.2	155.6	153.3	274.5	376.8	137.5	252.3	65.5	145	140.5	254.6	256.6	212.9	40.5	502.4	271.8	260.2	188.1	209.1
217628_at	48	11.4	18.5	52.2	72.7	64.3	96.3	71.9	24.8	45.5	57.9	116.2	140.5	89.1	15.4	148.8	27.3	103.3	97.8	14.5	63.2	9.1	69.4	107.1	114.5	80.9	181.1	124.1	73.3	180.3	69.8
217636_at	49.8	11.2	10.4	12.5	31.1	32.6	18.1	93.2	26.3	47.4	62.2	21.8	45.8	23.3	39.9	132.6	37.1	21.7	22.3	65.3	70.8	45.9	20.4	8.6	78.4	42.5	43.4	129.4	80.2	68.4	134.2
217654_at	150.6	71.5	101.9	109.7	40.3	88.5	158	179	137.9	175.4	187.8	54	125.4	134.8	179.2	201.7	118.1	108.5	95.8	175.9	76.1	48.4	159.5	284.6	240.5	172.1	235.7	154.7	200	217.9	159.3
217675_at	3.3	9.3	2.1	3.2	2.7	2.9	6	4.5	4.6	4.3	7.3	2.1	5.1	5.4	4.3	12.3	5.6	8.2	6.1	9.5	34.2	7.5	71.1	21.7	8	12.8	21.9	15	16.2	10.3	10.4
217687_at	159.7	169.8	183.4	132.4	142.4	138.2	173.8	185.8	227.1	207.4	269	117.9	134.8	151.1	138.7	199.2	207.7	136.5	225.6	121.1	180.5	153.6	224.2	152.7	226.7	245.5	254.9	329.4	317.6	171.2	189.8
217730_at	277.6	473	381.4	451.2	522	411.6	560.9	720.5	531.1	267.1	942.6	296.5	375.6	651.8	837.7	397	1265.6	532.4	995.6	529.7	899.1	782.4	497	475.6	618	543.5	808.3	594.1	717.3	931.1	660.7
217733_s_at	10383.8	15478.3	13975.5	12182.9	10889.6	10992.6	8440.6	10859.6	8920.9	8984.7	7376.9	15825.5	8507.8	8792.1	9297.2	12279.6	10460.7	9985.1	9987.6	13907.5	9733.1	10303.6	8616.5	7805.8	8358.2	7066.8	4927.7	6491.9	5862.4	6981.8	7031
217735_s_at	559.1	402	613.7	558	388.5	588.9	422.8	397	300.8	452.2	210.4	185.2	412.2	687.6	383.4	414	486.8	475.1	377.5	494.3	338.6	296.6	383.3	480.1	533.6	289.4	276.4	274.5	146.2	501.1	205.6
217752_s_at	3065.2	3516.4	2263.3	3257.6	2631.4	2345.1	2964.1	1972.1	2236.9	3655	2610.6	2330.5	1955.1	3722.1	3300.3	2900.1	3852.7	3053.1	2799.2	2290.7	2460.1	3116.4	2950.1	3731.4	3819.8	2567.1	4300.2	2262.1	3797.3	4015	3836.2
217801_at	5818.5	6493.3	4397.5	5474.5	4935.6	5472.9	4693.1	5366.9	4067.7	3904.1	3245.8	6538.8	4490.8	4367.7	6203.2	5086.9	3519.4	5865.4	5069.3	4254.3	5138.8	5277.4	5218.4	4056.6	4190.1	4267.1	3009.7	4006.3	3215.4	2854	5099.6
217802_s_at	3869	4919.6	4518.2	4699.4	4261.2	4222.8	4472.5	4285.6	5829	4789.8	4797.3	4584.2	4696	4154	5893.6	4272.2	5512.2	3910.9	5737.8	5407.3	4851.4	6202.1	4972.3	4947.6	6538.9	4892.8	6808.5	4890.3	6003	5675.3	4811.5
217833_at	953.9	1001.6	1054.8	855.5	648.5	1031.2	856.5	771.7	987.6	1201.3	1075.8	957.6	1413.2	874.7	1096.6	1120.3	1115.6	1069.4	1068.9	1165.5	896.8	1469.4	823	1014.9	1063.7	560.7	1384.7	1257.7	1141.5	879.6	1458
217842_at	596.5	590.2	352.9	670.2	375.2	389.2	428.3	407.4	419.1	788.1	544.6	478.2	470.8	587.8	641.2	361	458.4	430.7	545.9	579.5	541.1	609.2	529.3	505.2	833.4	455.2	1009.3	597.6	701.1	579.9	519.2
217860_at	2543.3	1252.4	2379.9	1710.7	2030.6	2258	2455.9	1783.9	1750.1	1478.3	1518.4	1855.9	1565	2105.4	1501.6	2066	1709.5	1705	1488.1	2005.9	1398.9	1556.3	1579.6	1339.9	1021	1393.8	1316.6	1215.8	1634.8	1094.1	2009.6
217881_s_at	131.2	104.3	189.7	76.7	183.8	125.1	226.1	147.4	145.4	81.5	48.3	136.8	177.7	137.5	78.1	113.4	89.9	22.5	166	106.7	115.8	177.2	105.4	174	216.8	56.8	35.4	20.9	52.5	79.1	103.6
217889_s_at	8.1	14.2	8.6	8.6	8.8	8.8	17.9	13.9	9.8	9.5	18.6	6.2	21.4	9	11.1	11.5	15.2	8.8	13.4	9.8	11.5	12.8	22.9	25.1	16.2	30	13.3	10.7	20.6	17.9	10.9
217897_at	4392.6	5648.2	6174.6	2863	3307.8	4524.3	3011.7	2774.9	2108	3088.4	1228.1	5390.4	2602.9	2839.3	2461.6	3223.7	3268.3	3931.8	1937.7	4863.9	2338.6	2413.9	1133.5	1449.7	2195	2065.1	1236.2	1909.4	2464.8	2800.4	2195.8
217924_at	113.5	153.7	126.9	139.4	131.2	118.4	122.9	209.2	212.1	93.6	234	104.7	125.7	126	197.4	120.6	48.7	122.9	111.4	122.4	139.5	151.1	205.9	151.7	39.3	94.3	243.7	23.3	37	88.9	64.8
217965_s_at	255.5	396.4	257.8	285.1	283.9	319.8	286.1	326.5	346	211.9	497.8	374	487	465.7	428.3	151.4	614.1	447.8	491.2	410.5	326.2	409.7	288.4	163	400.2	468.1	690.3	267	700.1	281	878.1
217970_s_at	209.3	225.6	259.1	308.1	309.8	236.9	356.7	303.7	238.5	282.6	263.1	166.5	291.4	342.6	304.7	264.6	333.3	279	329.2	209	397.8	386.5	412.2	480.1	435.3	349.5	363	423.2	318.2	317.9	222.1
217980_s_at	870	695.4	594.1	631.2	485.6	744.4	567.6	560.2	492.7	762.7	513.7	548.5	601.1	571.9	570.2	524.4	411	644.2	275.6	699	522.9	608.4	387.7	334.2	394.4	416.1	368.6	530.7	436.2	381.7	414.7
218003_s_at	1808.2	1883.7	1806.5	1358.1	1350.6	1753.4	1316.7	1267.3	1536.7	1220.7	915.5	1752.2	1285	1555.7	1314.2	1719	1084.8	1453.6	1308.2	1755.2	1203.6	1452.7	1536.7	1306.9	1007	1248.7	1226.9	1117.6	1054.3	814.1	1653.6
218009_s_at	219.7	158.5	253.7	204.1	157	142.7	142.2	173.8	192.5	245.6	55.1	135.6	202.1	116.2	167.3	128.7	190.5	179	60.7	221.3	55.2	153.8	109.8	28.2	19.5	119.2	46.2	72.3	164.8	32.8	195.2
218029_at	592.7	807.2	442.6	422.5	655.4	819.1	400.3	537.2	681.6	475.7	446.1	690.9	679.3	314.9	386.2	668.3	689.3	770.2	575	666.2	724.9	373	637.5	620.1	322.5	316.8	72.9	359.4	565.8	387.1	359.9
218033_s_at	659	915.2	410.1	358	369.6	424.9	417.2	228.2	416.6	260.2	361.9	497.1	247.7	292.7	430.4	315.1	319	388.8	218.5	443.9	374.1	307	344.9	330	405.2	242.8	310.7	342.6	204.8	254.1	329.4
218044_x_at	6.8	5.3	5.2	6.4	3.9	7.4	23.6	5.1	14	6.6	29.2	4.7	4.4	11.1	10.2	25.4	17.4	4	7.3	5.6	22	10.5	41.3	9.4	119.7	14.9	14.8	10.7	39.9	7.8	10
218050_at	1479.2	2128.1	1086	1427.9	1521.9	1495.2	1217	1787.6	1673.1	1304.3	1007.3	1826	1623.6	1513.5	1328.1	1146.5	1460.7	1157.1	1252.1	1256.3	1267.8	1370.8	1361.5	1371.5	1197.2	702.9	738.3	885.5	993.8	822	1254.5
218060_s_at	252.1	438	223.7	224.5	258.7	332.9	306.3	31.1	195.1	358	416.7	270.3	360.4	234.9	157.9	353.4	376.8	342.6	313.1	346.5	188.9	167.6	223.7	91.4	581.3	302.8	308.8	309.4	315.4	473.1	292
218063_s_at	6.3	8.9	8.1	10.4	9.5	7.5	10	10.4	17.2	9.2	14.7	7.6	16.3	9	8.3	11.2	13.5	10.3	8	9.3	14.9	27.2	26.1	20.2	10.5	56	20.5	12.4	11.8	16.6	8.2
218066_at	601.2	1225.2	562.5	1071.7	814.4	502.2	941.5	770	772.2	1177.6	2459.9	435.2	769.6	802.9	938.4	927.2	1332.5	750.8	728.1	841	909.7	732.3	942.7	1195.5	2116.3	1225.3	1578.1	1363.6	1484.8	2077.5	577.7
218080_x_at	384	518.4	538.5	584.2	491.6	626.6	519.4	417.3	428.7	677.4	612.6	469	403.8	721.7	425	900.7	902.8	385	659.3	450.2	423.1	428.5	298.9	676.5	708.3	665.6	987.3	640.2	701.6	716.8	539
218082_s_at	1133.8	1166.6	1167.4	955.4	1104.3	1112.2	840.1	689.8	1336.5	1218.6	792.4	916.8	788.1	821.8	561.9	804.5	754.9	1055.4	841.7	1152.1	1006.9	964.8	1016.8	969.5	720	1059.2	799.3	904.9	798.8	556.9	657.7
218088_s_at	1083.7	1147.8	917.8	1187.8	1084.6	873.7	1402.3	1036.5	999.6	1434.2	1019.5	881.3	813.5	1122.9	1000.1	822.3	1437.2	1269.1	1458	1248.7	1186.8	893.1	1028.2	1225.8	1676.5	1428.2	1632.9	1187.6	1332.5	1360.1	1260.7
218117_at	1083.8	922.1	1029.6	1127.6	1039.5	1145.9	1308.8	1358.4	997.4	860.9	426.9	1093.6	1393.1	1557.9	1176	1106.6	818.6	1247.3	861.8	1051.8	1069.2	1274.2	1150.5	1108	690.4	818.1	861.8	700.5	871.5	523	1594
218118_s_at	514.8	306.5	658	300.2	328.2	883	376.7	437.3	369.1	252	111.7	837	371.6	400	429.9	390.6	332.8	425.8	223.5	494.9	219.4	329.2	292.8	288.8	38.9	233.6	48.6	225.8	231.4	177.3	584.7
218138_at	873.5	801.2	857.2	693.4	822.8	913.1	943	895.3	533.6	770	492.2	976.4	751.6	492.3	585.7	563.3	520.8	660	577.5	903.1	645.1	411.8	577	583.9	460.9	832.5	494.7	663.8	449.7	564.7	654.4
218149_s_at	143.6	319.5	310	362.1	226.3	244	365.2	352.8	471.3	245.3	649.2	319.5	412.5	341.4	419.3	256.2	526.9	256.3	581.5	417.8	396.2	281.6	461.2	483.4	328.1	380.3	731.7	414.6	419.3	405.9	377.7
218179_s_at	460	255.6	386	224	221.5	239.4	309.6	109	392	266.7	104	235.6	224.5	300.9	347.8	285.7	221.9	279.9	221.4	275.6	185.1	295.6	347.5	345.8	170.3	180.6	53.3	206.8	134.7	125.2	295.4
218198_at	568	477.2	773.4	1144.9	715.4	687.9	793.7	1269	805.8	876	1645.3	912.8	954.4	622.8	895.6	1442.8	1086	722.3	1039.8	1082	619.5	960.6	974	942.6	1162.3	809.6	1504.8	856.1	1180.1	1545.4	804.1
218204_s_at	85.4	180.2	183.8	226.6	123.2	107.4	284.4	257.3	256	217.5	335.7	150.7	203	220.4	181.1	165.3	218.2	136.2	264	120.8	215.6	218.1	312.4	230.6	361.9	342.6	485.7	324.8	318.6	313.2	219.9
218258_at	791.6	604.9	723.5	725.2	533.1	592.6	598	595.6	523.6	629.4	671.8	687.1	426.7	534.7	670.6	510.9	576.9	446	635	586.4	712.1	468.5	721.7	729.2	564.1	974.3	481.9	822.1	794.2	849.5	836.6
218259_at	4545.1	7183.5	4957.7	3118.9	4459.5	4787	2790.4	3362.7	3605.9	3553.5	3007.4	5418.3	3772.2	2388	2433.7	4338.6	4077	3866.6	3636	4852.6	5270.5	2817.5	3634.5	2212.3	3387	2202.9	1106.8	4922.4	2093.6	1910	1774.3
218276_s_at	205	293.4	305.4	342.1	336.5	300.1	310.1	342.2	244.7	255.3	282.3	294.2	364.7	467	330.1	265.8	348.3	287.5	328.2	297.9	313.1	422.3	356.2	457.2	405.4	435.8	535.4	385.8	531.2	419.6	333.8
218291_at	459.7	331.5	390.2	420.9	407.3	480.4	395.8	463.5	447.8	249.3	304.4	526.4	569.7	454.1	278.3	461.8	352.8	551.1	400.1	307.4	422.2	440.4	233.5	313	254.5	239.4	285.9	219.6	316.6	291.2	383.2
218303_x_at	788.3	740.7	748.1	945	1048.1	743.6	840.7	830.2	883.6	1149.1	895.3	651.2	923.6	1128.4	1042.5	813.5	862.1	686.2	868.8	815.6	1064.4	1257	1138.4	1062.7	1087.9	1300.5	739.4	1111	1548.7	1554.8	1055.6
218306_s_at	1744.4	1987.3	2625.5	1634.5	2180.1	1720.6	1693.2	1487.2	2291.4	2032.2	1169.7	1897.8	1788.2	1758.6	1440.3	2287.6	2038.8	1905.3	1662	2508.4	1574.6	1358.5	2161	1021.1	1174.2	1307.9	967	1199.3	1373.9	1161.8	1333.8
218363_at	638.1	734.5	695.8	924.3	852.4	760.1	771.8	756.2	789.5	760.7	664.8	668.4	803.9	799.2	654.1	756.3	739.9	710.4	668.8	846.7	817.3	607.5	790.1	730.5	566.8	721.1	351.5	535.2	655.8	670.8	576
218393_s_at	86.4	29.6	148.5	85.6	175.3	130.9	154.2	200.6	148.1	153.8	45	126.5	144	105.5	104.4	37.8	35.9	78.9	172.7	132.5	100.3	110	156.6	118.3	33	203.9	61.8	37.5	63.9	29.8	76.8
218406_x_at	110.5	104.1	75.9	135.2	170.7	95.5	157.1	49.6	85.9	234.2	117.5	91.7	260.9	132.8	140.1	184	80.8	73.8	45	158.5	256.1	77.4	64.7	162.8	245.4	119.4	102.5	235.8	340.8	177.5	201.5
218432_at	1047.6	1125	1085.2	534.1	928	987.5	647.7	595.7	828.9	692.4	217.3	1080.2	955.5	719.2	817.2	1018.3	361.2	572.9	543.2	722.6	793.8	892.5	726.5	601.2	534.8	747.7	214.9	581	458.3	509.6	762.7
218456_at	1558.3	1473.2	2113.5	1296.6	1865.5	1719.5	1677.4	1232.9	1472.5	1422.3	857.4	1421.8	963.8	1311.7	1140.7	1990.1	985.9	1601.8	1294.1	2076.6	1039.5	1287	1233.6	953.4	788.6	1072.6	519.4	982.6	934	908.2	1096.1
218493_at	1244.1	1616.4	999	920.9	918.4	1220.2	882.1	826.9	1096	686	1268.6	1185.4	832.3	1170.9	822.8	1529.1	813.5	1033.5	1306.8	1134.2	1101.9	1042.8	834.6	891	754.9	731.1	499.8	762.7	814.8	798.2	639.9
218517_at	464	463.9	557.7	573.7	595	316	634.1	465.1	690.7	745.8	778.8	501.2	502.1	407.9	518.8	512.7	721.2	615.3	501.7	754.9	650.1	513	775.1	736.1	1028.1	868.8	1056.7	912.2	788.7	826.9	456.4
218543_s_at	254.1	333.9	305.8	465.6	332.8	238.2	370.6	404.6	340.3	374.9	515.7	263.3	267.6	372.3	604.8	384.9	410.6	505.3	468.4	421.2	325.8	311	580.3	542.1	1276	367.7	1027.3	422.9	488.6	547.4	367.4
218546_at	2225.4	2698.8	3581.6	1587.1	1473.8	1979.4	1302.6	966.5	1500.1	1974	1769.2	1999.4	1422.5	1296.1	1006.2	2657.5	2258.8	1720	1997.8	3342.4	1605.5	1595.2	1165.1	1209.3	1188.9	675.8	1152.5	1194.2	693.7	1055.7	1056.5
218553_s_at	260.8	367.6	220.4	298.5	279.1	341.8	373.4	174.3	438.8	381.2	595.9	344.4	384.9	279.1	394.1	238.4	366.5	343.2	429.3	373	282.2	374	233.8	572.6	460.9	432.1	598.1	392.4	543.3	492	251.2
218563_at	3711.7	5045.9	2116.8	2826.7	3989.1	3883.5	2290.7	2904.8	3381.6	2945.5	2558.6	4656.5	2881.9	3396.5	2287.2	2848.7	3070.4	4180.3	3542.8	2748	2712	1921.7	2219.1	2255.6	2582.7	1641.1	2656.5	2483.3	1809.6	2025.1	2778.8
218619_s_at	296.1	385	319.4	329.2	265.4	386.3	395.4	385.2	180.8	512.2	641.7	429.1	236.6	350.5	396.8	279.9	461.2	424	381.3	407	272.6	329.5	329	275	609.4	229.2	769.8	373.8	541.3	673.5	407.3
218630_at	144.7	192.8	129.9	230.9	144.8	151.3	164.5	141.2	436.9	237.7	503.9	212.2	228	203.9	231.4	94.1	367.1	161.1	306.4	184.6	263.8	215.3	204.6	230.7	230.1	234.6	844.8	200.9	302.3	321.7	212.7
218657_at	910.7	815.4	782.8	905.1	670.6	961.8	474.4	712.1	607.8	567.5	196.6	740.6	600.7	356.3	463	291.3	1060.6	1025.2	730.6	782.7	786.4	308.2	96.7	277.4	130.8	545.7	142.1	875.4	359.9	72.1	511.5
218658_s_at	200.8	186	216.6	240.5	142.4	195.9	186.4	268	380.4	338.3	496.8	217.7	200.4	268.9	349.8	319	321.6	273.9	294.7	300.4	328.9	294.6	394.9	288.2	357.5	253	426.7	298.2	352.6	326.2	293.2
218669_at	470.6	304.1	437	490.1	405.1	471.1	311.3	439.3	538.8	277.5	339	392.2	289.4	311.4	605.7	397.8	380.1	264.8	515.5	518.8	561.8	457.3	409.8	447.2	368.8	374.8	287.2	265.8	373.2	347.6	339.8
218751_s_at	1658.5	1808.2	2650.4	907	1167.6	1974.9	926.8	598.8	943.2	1276.3	1300.5	1423	730.4	1208.9	796.1	2237.3	1455	1838.6	1501.3	2015.6	1130.9	721.5	968.8	424	691.3	584.2	1389.8	815.2	417.8	566.3	602.3
218801_at	690.1	697.2	569.6	711.8	600.4	612.3	441.2	540.9	666.9	423.9	327.1	570.3	740.4	624.2	686.9	408.7	589.9	625.6	335.8	556.2	459	548.9	465.5	192.1	419.8	204	313.9	320.7	363.4	327.7	379.6
218808_at	141.2	106.6	86.4	30.9	75.4	62	106.6	107.6	37.2	231.1	212.1	97.8	168	72	69.1	117.8	119.2	91.6	67.2	109.9	171.2	117.2	154.8	256.4	276.3	127.2	293.1	248.6	112.8	186	77.9
218826_at	296.5	250.8	254.5	400.5	279.8	328.1	420	427.8	482.5	580	560.5	394.8	567.7	318.6	623.9	765.5	535.3	466.6	411.3	377	596.2	413.1	320.3	485.8	578.7	568.9	737.2	602.2	648.2	433.8	558.2
218827_s_at	480.7	304.3	275.4	224.4	312.6	329.9	294.4	265	293.1	219.4	109.1	261.6	263.7	249.8	390.9	141.5	29	273.7	101.1	79.5	232.4	295.4	333.3	244.8	251.3	245.5	24.9	269.7	135.4	226.1	290.6
218888_s_at	1017.1	491.7	541.1	608.8	520.1	909.4	469.8	559.5	431.5	275.8	353.3	956.4	635	394.8	462.3	425.9	344.7	413.6	417.7	546.8	337.6	208.6	374.3	292.4	259.4	315	93.8	336.9	153.8	157.1	596.9
218891_at	481.1	538.4	496.1	434	253.2	417.8	520.6	107	260.9	935.9	527.8	479.9	474.9	430.2	522.9	206	306.2	764.5	637.9	584.1	217.5	355.9	447.5	743.8	749.2	554.9	422.5	1273.9	770	657.5	455.9
218895_at	209.5	272.6	283.2	362.7	172.7	248.7	265.1	275.6	252.1	269.8	246.7	281.7	253.9	211	356.7	308.5	121.3	365.1	308.1	375.7	278.2	256.1	263.2	288.5	267.1	394.3	596.5	480.2	248.3	377.2	364.5
218902_at	424.8	655.9	185.4	335.7	171	226.1	257.4	232.2	325.7	630.1	489.8	107.5	332.6	429.7	409.2	177.4	427.7	571.4	395.6	285.6	482.1	440.8	511.9	370.1	645.3	390.4	866.8	436.8	662.6	601.3	508
218942_at	1169	1550.9	1358.8	1137.6	1382.1	1198.2	1335.9	873.7	1041.1	1430.9	1161.8	1611.5	1219	1178.2	937	1534.7	1012.7	1290.1	1137.8	1531.6	1090.8	729.4	709.4	1098.6	844.5	867	734.8	918.1	847.5	733.6	910.4
218966_at	527.4	373.6	514.8	502.8	477.9	483.6	614.2	721.4	391.7	890.7	684.8	453	738.9	450.6	604.2	545.3	823.1	662.5	482.8	539.3	500.6	690	438.9	497.3	657.5	628.6	871.6	742.1	999.1	1200.1	614.7
218972_at	446.5	263.5	420.6	389	479.1	365.4	538.2	347.5	575	635.2	500.9	487.3	601.3	621.2	471.5	472	517	419.7	377.2	354.1	458.4	638	603.6	332.5	590.6	316.3	710.9	532.8	674.7	600.2	731
218977_s_at	77	59.5	16.4	103.2	148.7	140.6	111.8	168.6	122.1	120.6	169.2	127.3	65.3	190.1	182.4	210	204	201.7	179.3	127.9	182.3	199.5	45.7	253.5	215.4	168.8	52.7	180.3	145	175.9	190.1
219021_at	138	84.3	174.1	161.4	168.8	181.3	251.4	157	122.9	165.5	596.8	127.7	298.9	169.4	236.2	164.5	223.1	270.4	139.4	49.6	148.4	216.3	191.1	218.7	215.3	211.6	380.3	270.5	263	252	228.1
219042_at	444.2	216.8	289.9	350.8	321.7	577.7	157.8	474.5	317.3	191	240.5	316.2	247.7	225.5	223.1	418.4	398.7	425.9	154.8	727.9	223.9	106.7	326.7	131.3	116.5	177.3	182	166.9	53.5	61.9	64.8
219073_s_at	299.8	424.2	464.6	344.3	429.8	316.6	245.2	175.6	214.1	200.5	308.9	397.3	146.3	272.3	180.2	513.7	378.1	263.3	341.3	435.9	365.4	292.1	342.7	179.8	67.1	95.7	178.4	139	135.2	143.4	94.4
219080_s_at	98.1	37.7	87.2	83.7	147.4	109.3	113.4	52.1	103.7	90.9	309.6	116.4	135.9	91.2	153.2	84.8	131.6	80.7	69.1	65.4	100.9	110.9	163.2	146.8	204.7	120.9	227.4	178.6	173.6	315.5	148.7
219081_at	101.2	94	141	86.9	66.5	114.6	98.6	93.6	148.4	57	274.1	101.5	109.4	125.4	145.2	41.9	47.2	66.8	98.4	199.2	137	154.3	40.8	96	217	185.9	332.1	161.2	88.8	118.4	153.4
219115_s_at	106	91.9	113.9	12.8	73	125.8	205.9	61.5	119.6	84.6	209.4	103.1	75.8	78.3	89.5	145.6	131.7	14.1	116.9	42.7	67.7	156.2	48.4	72	132.5	179.1	93.7	274.8	168.4	178.9	162.8
219145_at	1093.5	992.3	1053.3	909	1089.9	1168.9	846	921.2	986.3	1156.1	750.7	1027.6	1065.8	846.7	747.1	992.3	896.7	1412.5	904.8	1091.9	866.4	570.3	795.2	571.7	780.7	804.1	911.3	973.8	711	539.8	941.7
219167_at	286.4	506.6	322.6	948.5	669.2	512.7	921.8	1112.2	1031.6	596.7	1269.1	795.5	938	618.5	1516	539.6	1487.4	818.9	2350.2	488	1504.5	1399.3	801.9	1321.4	1373.6	1186.9	1069.9	1090.8	1941.2	2259.7	806.2
219170_at	1082.6	742.9	1313.9	979	1116.2	790.3	1027.1	1241.1	850.3	1017.7	895.4	749.3	612.9	783.8	440.2	1436.3	1004.8	1075.5	1185.7	995.2	659.7	357.2	835.8	472.7	700.5	573.4	1227.3	604.2	393.3	840.3	584.1
219200_at	504.5	375.4	350.4	346.1	307.5	446.7	308.1	337.8	314.4	315.8	274.8	239	324.6	372.3	199.6	295.2	246.8	267.6	265.4	290.3	198.9	331.9	316.9	270.3	370.2	149.1	292.7	201.4	247.8	368	300.9
219254_at	11.3	5.1	9.7	5	11.5	5.5	12.7	21	10.8	21.1	52.6	11.3	30.2	7.3	55.9	6.4	16.2	27.1	14.3	9	20.2	28.9	11.4	42.3	80	9.5	23.3	31.6	43.2	11.1	26.6
219266_at	133.4	182.7	102.8	81.2	63.6	82.9	135.8	100.6	103.1	190.1	207.7	68.6	155.4	163	182.2	121.4	123.1	90.6	118.5	139.5	96	159.1	163.3	160.3	148.7	156.8	223.5	206.7	144.8	116.6	108.7
219288_at	1919.2	1603.4	1728	878.8	1323.8	1553.3	1266.9	1151.3	1094.1	1044.7	752.7	1487.6	1176.5	1121.5	899.3	1359.6	877.5	1091.3	772.9	1301.9	933.6	1050.7	1156.9	871.8	1060.1	958.5	712.5	1265.7	577.8	695.8	1052.5
219307_at	210.2	211.2	192.9	113.2	142.9	180.4	137.8	165.5	163.4	218.5	154.4	211.5	124	169.7	118.1	171.9	160.3	197.7	254.1	167.2	220.1	92.6	217.5	192.2	280.5	246.9	99.8	253.5	218.9	303	129
219312_s_at	46.7	67.8	69.1	51.4	50.9	30.9	59.5	47.2	105.2	82.9	52.7	24.4	55.9	78.8	91.3	63.1	65.5	70.4	59	64.9	96.8	89.2	123.3	124.3	101.2	91.7	106.1	27.1	71.2	99.5	83.5
219327_s_at	112.8	264.4	92.6	220.8	42.8	154.3	124.5	17.4	101.4	225.7	120.1	165.8	150	154	262.4	180.2	341.3	124.1	268.2	231.8	237.8	222.6	69.3	150.7	217.4	209.6	262.4	395.9	360.3	309.2	136.5
219330_at	80.4	43.1	71.4	57.8	66.5	83	86.9	128.5	52.7	104.5	162.4	74.8	121.6	105.2	52.3	14.3	98.6	103.5	131.9	31.5	51.7	102.3	101.1	128.9	201.5	96.7	263.2	199.1	90.8	219.2	74.6
219332_at	119	321	229.3	500.9	115.9	124.4	529.9	309.5	302.8	473.4	716.8	154	159.5	280.1	383.3	391.8	651	351.1	398.7	449.4	343.7	296.7	373.2	467.3	531.2	322.2	763.7	512.8	668.6	822.3	345.7
219340_s_at	167.2	55.8	156.9	163.9	148.1	67.9	127.4	174.8	192.7	219.4	318.2	107.8	174.7	191.5	92.7	181.6	182.5	132.7	137.9	103.2	143.6	178.9	273.4	191.9	209.9	170.8	234.4	220.8	192.8	239.3	181.3
219350_s_at	1809.7	1125.3	980.3	1292.6	958.7	1284.2	1008.5	866.7	1155.7	957.8	2145.9	1274.8	1720.7	1780.8	1269.9	1336.9	1136.1	1467.4	846	1102.9	1407.9	1933.3	1075.8	877.5	923.4	1515.8	1429.9	1328.4	1688	1414.6	1415
219363_s_at	487.8	370.7	456.6	432.7	412.6	381.6	336.4	397.4	469.9	449.6	406.9	241.9	400.1	412.2	431.1	485.8	360.3	396.2	410.4	487.3	432.6	650.6	314.3	283.8	369.9	370.4	224.3	218.4	356.8	371.5	316.6
219367_s_at	178.8	102.9	225.7	245.1	291.3	284.2	240.5	206.8	76.9	208.4	428.7	248.6	282	268.6	355.2	415.5	169.5	290.1	245.8	241.5	288.3	274.1	183	291.1	332	298.7	296.4	287.1	386	90.5	324.6
219369_s_at	62.8	163.4	129.8	83.7	45.6	92.3	102.4	41.4	124.4	117.5	49.2	142.6	46.2	51.9	152.2	123.1	88.3	88.4	112.3	72.5	75.8	68.9	37.9	25.8	120.6	23.4	31	81.3	15.2	34.7	27.4
219370_at	737.7	459.1	787.9	460	868.7	570.4	801.9	167.3	637.6	660.6	724.5	449.8	262.3	561.7	377.1	1066.8	1017.6	731	717.8	760.5	331.3	489.7	566.3	284.4	438.2	170.7	705.4	13.9	378.8	240.8	204.4
219371_s_at	359	1424.9	564.9	594.3	409.8	544.8	340.7	353.3	533.3	849.4	1270.4	411	412.3	544.9	825.7	455.8	842.3	700.4	656.3	541.4	420.6	555.9	720.1	658.9	923.6	368.7	672.7	1287.2	685.9	1046.7	617.7
219375_at	296.9	401.8	751.1	679.8	775.4	589.8	923.5	805.6	503.7	405	92.9	754.1	463.9	637.7	485.6	664.1	681	440.1	633	484.6	524.3	672.1	920.7	539.4	361.6	1359.9	134.8	337	309	331.3	290.7
219412_at	15.2	25.3	6.5	12.4	12.9	16.6	35.7	43.6	14.7	57.1	32	21.1	25.3	9.9	15.7	13.2	21	15.9	23.2	7.8	9.1	9.1	10.2	33.3	26	21.7	53.9	26.7	31.8	16.7	54.6
219476_at	11.9	9.1	10.2	9.5	8.6	12.1	15.9	14.8	12.4	8.8	21.8	11	11.5	26.1	15.8	29.9	20.3	12.1	11.4	11	23.6	24	21.4	14.2	35.5	16.3	55.2	15.7	31.6	22.8	21.8
219478_at	1019.4	767.5	555.4	1081.8	751.1	693.7	840.5	731.9	577.4	799.9	818.8	386.4	596.2	572.4	462.8	723.7	564.1	656	553.9	478.8	526.5	386.7	600.5	517	429.7	356.9	330.3	763.3	291.3	484.3	627
219497_s_at	1090.9	1244	797.2	572.1	573.4	703.7	472.8	403.4	602.9	445.6	739.2	764.1	572	334.5	527.2	604.5	397.5	987	342.8	871.1	355.8	480	442.1	222	313.1	343	218.2	536.6	173.8	285.9	423.6
219508_at	38.1	31.6	18.8	58.4	15.9	17.3	13.1	13.9	95	19.3	65.5	17.6	57.6	65.6	23.5	24.6	24.2	26.2	50.7	10.6	30.7	15.7	24.7	137.5	137.9	61	37.9	80.9	137.7	44.9	39.1
219525_at	69.8	194.4	36.7	27.2	19.9	214.2	30.6	109.8	321.8	52.8	373.8	214.1	231	18.5	40.1	186.8	288.6	619.1	162.5	99.3	1588.2	515.9	458	274.6	474.5	604.3	42.7	1804.5	436.1	277.5	762.3
219528_s_at	1166.4	1861.3	347.3	843.4	1281.7	1208.1	839	1020.1	842.6	454.4	549.7	1398.3	841.3	630.7	647.6	979.9	682.2	1332.6	1049	712.3	991.5	420.9	611.9	333.2	760.3	707.9	344.5	1019.2	382.1	493.9	360.6
219539_at	183.7	87.6	184	232.8	138.3	85.6	58.7	148.8	171.9	107.2	186	84	86.2	143	156.3	153.1	228	177.9	223.8	166.8	189.2	162.2	89.7	154.7	224.7	186.4	301.1	242.3	75.6	230.6	241
219540_at	133.5	163.4	203.6	231.8	159.1	198.3	147.7	207.1	244.1	215.6	232.2	161.3	249.3	191.4	301.7	168.2	233.4	215.8	252	254.9	318.8	299.4	289.3	319.9	247.7	271.6	212.8	342.2	354.9	244.9	241.4
219550_at	192.8	264.3	238.7	219.7	151.6	116	103.6	68	120.2	496.8	134	199.9	191	320.1	242.8	220.1	693.7	357.7	273.8	363.5	287	423.1	348.3	275.9	71.8	312.6	687.9	108.9	573.4	598.8	268.7
219561_at	212	20.4	61.2	146.2	245.1	129.6	62.6	263.8	73.4	95.5	221	243.9	352.6	181	185.9	45	387.4	439.6	260.4	182.8	111	333.2	170.2	128.9	225.1	260.8	189.7	194.2	372.9	261.4	343.1
219572_at	1947	1219.7	1816	865	920.4	1614.6	733.1	991.3	914.1	586.6	1190.9	1731.9	1738.5	875.2	932.9	642.7	409.7	501.8	531.7	1036.6	783.3	452.2	667.9	972.6	651.6	521.5	497.9	845.2	626.9	625.6	852.2
219590_x_at	720.1	779.8	767.6	733.2	658.1	762.6	952.9	785.3	740.3	814.5	1080.9	672.9	730.1	1005.7	989	811.7	942.7	868	837.8	818.5	725.3	835.1	814.9	1061.1	1046.2	799.5	1071.7	784.2	913.7	902.9	901
219606_at	64.2	114.3	58.8	95.8	78.5	54.3	76.9	17	151.8	146.2	27.4	52.9	66.5	79	119.5	123	144.3	38.5	109.9	76	95.3	48.6	54.3	22.3	208.5	84.9	185.1	123.9	189.9	180.3	79
219613_s_at	277	163.6	295.4	393.7	348.2	313.4	583.9	492.2	222.2	388.4	118.1	284.1	464.4	169.2	259.6	414.7	342.4	342.5	280.1	329	292.7	265.2	349.6	470.3	386.7	360	677.6	569.4	584.7	434.7	415.7
219615_s_at	154	108.4	102.3	123.3	85.2	68.9	96.7	114.6	187.9	181.4	307.2	57	87.8	107.4	90.1	76.3	176.8	115.4	206.7	113.6	124.4	99	138.6	154.7	273.1	146	305.1	287.4	200.3	334.4	126.3
219618_at	40.1	59.1	111.1	132.6	140.5	28.6	100.8	108.7	40	100.5	173.6	130.6	86.4	89.7	118.3	143	138	73.8	168	78.4	119.9	97.7	169.9	175.6	229	59.8	174.7	127.5	205.6	180.7	170.1
219628_at	643.3	519.4	1082.1	776.7	746.6	748	1042.2	1084.7	505.4	486.6	373.8	957.1	937.9	1089.8	481.9	854.3	564.9	666	995	980.6	692.2	726.1	516.3	662.6	454.3	498.5	403.6	746.5	613.2	312.8	705.2
219641_at	378.3	360.4	462.5	388.3	335.7	379.5	336.3	165.8	339.6	355.1	531.3	320	373.9	590.9	332.2	463.1	531.6	406.2	336.3	521.5	326.4	336	382.5	215.3	571.6	439.4	499	467.7	405.9	417.9	333.4
219643_at	975.1	1440.3	672.3	837.2	687	895.8	415.4	355.1	641.9	628.4	631.4	858.5	804	488.1	870.3	654.5	453.3	548.1	593.7	719.1	959.1	743.2	596.8	408.5	313.3	278.5	335.4	607.1	456.1	567.5	272.2
219660_s_at	305.7	332.2	284.6	117.7	208.2	167.8	239.4	230.3	314	138.6	517.3	194.9	179.8	155.4	264.5	263.2	256.1	245.6	206.8	283.2	289.4	182.3	243	216.1	51.3	153.3	226.7	215.5	165.7	228.7	205.2
219668_at	159.3	118.2	213.6	37	149.8	179.1	33.7	187.9	145.1	134.6	204.7	204.2	104.4	139.5	136.7	246.2	104.7	130.1	87.9	191.8	250.7	66.6	193.8	144.5	32.2	137.7	58.6	16.4	57.3	131.1	134.4
219688_at	142.1	120	170.7	108.5	172.6	140.5	132.8	86.6	30	120.3	62.3	149.4	165.2	80.3	102.5	173.9	10.8	171.9	9.9	144	154	74.5	126.3	50.6	12.4	64.1	17.1	41.6	33.4	28.7	145
219690_at	125.4	198.9	158.6	181.5	183.4	150.6	194.9	142.8	248.7	185.1	347.4	243	148.5	187.1	270.7	175	395.8	126.2	269.5	145.5	295.2	165	268.6	280.9	279.5	156.6	339.6	197.1	261.2	486.6	387.1
219697_at	1488.1	1162.7	1209	601.3	932.2	1207.4	840.2	609.6	1337.5	924.6	1130.6	1082.7	711.8	688.1	790.5	1283.7	901.8	1090.4	607.5	1069.9	1010.9	500.5	761.8	392	883.3	366.1	640.5	795.8	675.3	836.7	343.1
219718_at	133.4	146	131.1	123.2	106.8	179.7	132.2	123.4	123.8	71.2	66.3	115.2	134.5	126.3	140.6	24.1	69.2	119.6	115.9	71.6	110.3	154.9	30.5	31.4	43.8	106.5	54.3	42.2	75	76	152.8
219719_at	313	166.7	266	482.2	452.4	220.5	402.9	419.1	442.6	365.8	152.6	169.5	407.6	305.8	398.4	277.2	180.9	270.1	696.1	318.1	279.3	498.8	706.1	810.6	137	493.7	61.6	423.1	75.2	130.7	104.4
219736_at	1827.9	2010.3	810.6	491.5	1010.1	1326.9	385.7	514.2	563.2	482.2	175.9	1400	654.8	455.9	628.2	1018.9	433.9	786.1	471.6	544.2	387.6	180.5	352.5	68.4	325.8	288.9	246.5	395.6	147.7	163.9	327.3
219746_at	283.8	279.6	288.9	248.1	355.2	269.9	274.1	351.5	487.8	534.1	740.3	336.1	307.2	308.2	434.4	305.3	344.5	475.7	336.9	473.8	440.6	336.3	301.5	344.5	481.5	650.1	498.9	722.6	545.9	672.6	622.9
219785_s_at	164.5	133.9	82.7	90.1	79.1	94.5	59.8	116.6	83.1	68.6	209.4	134.3	73.6	67.5	15	21.1	70.9	27.7	48.4	117.3	104.5	83.9	80.1	67.3	26.8	134	24.3	66.7	13.9	27.9	60.9
219799_s_at	336.6	178.2	183.5	391.4	318.9	378.2	661.1	180.6	385.9	620.3	504.7	99.1	497.5	579.3	505.1	325.7	474.4	451.3	188.9	194.6	409.6	390.9	398.1	182.9	503.4	233.2	568.4	495.4	585.7	614.1	736.4
219801_at	169.8	144.8	208.8	210.8	197.9	170.5	242.7	165.7	207.8	251.8	395.2	212.5	151.1	208.1	241.9	295.3	289.7	210.2	276.1	211	196.8	197.1	199.7	239.9	452.7	242.9	413.8	213.6	355.7	424.8	186.5
219825_at	431.4	256.2	751.8	266.4	523.1	503.8	315.2	25.5	353.9	308.7	65.4	499.1	265.6	351.6	236	708.6	264.9	471.8	446	660.6	307.6	217	355.5	126.1	215.3	28.6	39.7	30.2	61.3	35.6	211.4
219842_at	149.3	186.3	122.2	142.6	128.5	214.3	166.7	219	215.7	175.3	139.1	185.4	154.7	68	159.4	236.8	186	131.4	116.4	132.7	187.3	64.8	74.6	210.8	140.5	97.9	206.4	105.7	84.5	33.3	94.8
219856_at	4	8.6	8.7	6	4.3	6.7	10.9	8	7.6	10.7	12.1	10	10.4	12.2	7	6.7	9.3	7.1	7.9	15.8	10.4	10.1	7.9	18.6	13.7	4.4	20.3	7.8	11.7	18.4	12.5
219871_at	251.2	285.7	203.3	207.5	235.7	316.5	230.2	286.1	293.1	209.1	200.2	133.2	273.1	328.3	371.2	127.8	223	280.4	259.5	99	212.7	286	222.5	275.4	177.4	116.1	182.6	244.6	203.9	176.1	141.8
219889_at	282.4	236.7	271.5	212.1	197.8	213.8	353.9	252.6	453.9	414	418.7	187.7	288.3	214.8	280.7	223.4	262.3	205.3	285	274.1	339.7	214.8	301.9	270.5	438.5	292.4	516.8	497.8	294	357.2	312
219919_s_at	9.2	35.3	10.6	33.2	9.7	8.6	13.1	11.8	37.4	17.7	20.4	12.2	16.7	103.5	33.2	17.2	148.3	85.4	42.3	61.9	106.3	33.8	46.5	28.3	20.8	16.1	158	27	104.3	47.2	16.3
219961_s_at	214.8	298.7	404.2	268.8	212	307.4	505.2	333.9	249.7	268.4	79.9	298.4	310.2	518.5	58.4	261.3	434.8	312.2	130.8	444.9	269.6	349.2	507.9	245.7	175	299.5	450.7	44.7	56.8	53.9	159.5
220021_at	58.6	82.4	51.9	257.9	110.7	116.3	142.9	293.6	252.9	133.4	310.9	127.1	98.4	330	252.7	287.3	145.5	42.8	83.3	135	133.8	229.7	292.6	250.1	214.9	148.8	437.2	275.5	224	205.6	151.7
220045_at	1678.2	1064.1	875.9	1192.2	907.7	1942	826.7	1770.5	999.2	518	1082.8	1423.4	2121.6	842.6	877.7	752.8	538.7	1068.4	405.9	653.8	731.7	448.5	550.5	538.3	698.1	792.4	339	1151.3	438.5	422.4	1628.6
220051_at	25.4	77	75.5	66.5	62.1	14.2	63.1	28.5	142.4	73.9	146.6	14.9	29.1	22.7	130.3	19	40.3	128.8	29.9	79.7	58.6	69.7	110.9	80.1	176.4	11.5	246.2	201.6	182.3	122.8	77.8
220108_at	237.4	326.2	249.5	341.1	350.9	270.6	354	330.1	456.2	378.4	270.5	344.6	406.6	101.4	320	356.3	392.6	199.6	417.8	304.4	382.2	272.8	361	306.5	58.6	133.7	77.6	552.9	285.5	93.5	187.6
220115_s_at	1638.8	1814	2188	1023.9	1318.5	1197.2	1402.5	971.4	1416.9	1402.9	1343.2	1209.2	963.2	678.8	1211.9	1086.4	748.1	912.5	742.7	1678.2	1112.5	1248.3	870.2	689.2	861.6	870.6	997.8	764.3	698.3	1031.1	588
220122_at	1679.9	4852.8	453.5	1786.4	1764.9	1360.4	354.4	2744.6	2132.4	1785.6	244.3	2960	389.4	1039.4	1072.2	256.2	230.5	146.9	178.6	1526.5	2588.1	1034.2	277.9	1132.3	1445	255.1	589.1	339.5	1193.3	1079	1511.8
220124_at	36.1	63.8	57	35.9	14.9	46.7	72.5	75.4	43.9	39.7	20.8	49.6	14.6	36.5	88.9	48.6	79.8	9.3	156.1	60.7	130	102.8	44.6	20.5	140.2	125	45.7	104.5	111.3	207.5	68.7
220128_s_at	306.4	336.3	235.8	145.2	330.6	252.2	526.8	77.8	381.5	594.6	467.7	328.6	464.9	339.2	212.9	653.8	684.1	423.8	368.2	352.5	320.7	271.7	397.3	609.7	626.2	84.5	905.8	565.4	450.5	707	440.1
220140_s_at	430	637.6	409.1	834.6	459.8	512.7	275.7	351.7	409.2	740.3	677.5	633	368.6	721.2	533.2	487	750.2	706.8	544.6	495.3	499.7	284.7	576.4	436.1	719.1	628.3	747.6	707.5	581.7	651.2	488.4
220142_at	568	539.6	316	517.7	668.3	325.9	622.8	531.9	500.3	537	109.7	290.2	316	550.5	590.3	209.5	536.9	380.9	415	407.4	276.4	464.1	901.4	638.1	983.6	251.6	1534.4	753.3	803	1127.5	762.7
220148_at	306.1	486.1	303.5	363.4	493.8	358.9	562.3	368.6	372.5	385.6	312.5	174.4	167.5	447.1	210	214.5	576.8	281.6	772.6	443.1	195.6	352.8	332	422.4	241.4	223	1144.8	252.5	213.4	325.1	294.2
220156_at	139.6	151.8	194.6	143.7	100.1	176.6	55.7	313.4	150	210.1	182.2	221.7	430.9	103.6	300.9	134.1	353.6	159.6	186	159.9	204.7	275.8	103.5	217.3	235.8	259.4	72.8	213.7	411.4	350.3	414.4
220166_at	583.1	683.8	772.2	642.3	503.3	685.1	603.2	424.2	643.2	582.8	651.2	696.3	625.7	369.9	418.3	1003.3	670.1	688.9	473.4	822.6	396.9	336.2	500.6	296.9	363.8	228.8	289	752	364.9	279.3	285.1
220174_at	35	114.5	43	33.1	21.1	33.4	186.1	79.7	42.6	62.3	63.6	25.5	74.8	38.4	93.8	122.3	80.8	45.2	128.1	91.8	49	45.5	56.9	69.2	166.3	50.2	128.7	163.6	175.1	158.8	95.4
220215_at	246.9	203	325.7	311.8	231.7	148.2	403.4	315.1	270.8	274.8	401.8	291	222.1	165.7	388.3	255.5	512.1	267.3	583.6	286.6	306	294.8	312.3	379.4	391.8	284	859.8	330.4	547.8	424	335.1
220300_at	25.5	42.4	40.2	14.8	21	75	22.7	12.3	26.6	96.1	19.6	22.7	57	22.7	26.7	20.4	108.1	32.5	58	24.7	64	95.9	50.6	28.2	176.1	24.9	167.4	181.3	79	21.6	133.2
220309_at	44.3	29.9	38.3	46.6	148.4	45.2	76.6	45.7	67	90.7	231.3	39.3	41	48	49	60.3	52.3	134.7	90.1	131.3	138.4	50.2	72.8	137.6	96.8	127.5	126.5	185.1	81.1	122.9	50.5
220317_at	42.7	27.5	68.6	14.4	31.6	49.2	14.9	17.1	119.7	65.2	166.6	32.9	64	30.9	72.8	89.6	30.1	52.5	71.6	125.5	91	119.3	118.4	21.4	162.8	53.4	94	159.2	157.2	81.7	68.9
220321_s_at	60.5	84.8	82.9	61	50.2	40.1	82	94.9	177.8	63.2	96.4	52.3	97.7	80.9	196.2	114.5	16.9	70.1	161.4	138.3	127.6	118.1	95.7	116.1	113.4	143.2	213.6	134.1	104.4	110.2	66.8
220347_at	146	60.4	162.5	144.5	132	148.4	199.3	163	124.3	153.7	300	176.3	196.2	181.6	184.2	168.9	236.6	90.8	171.2	87.7	149.1	101.6	190.1	32	290	154.4	193.4	293.5	166.3	234.3	172.5
220357_s_at	264.4	315.3	216.9	247.5	285.5	251.6	265.3	221.6	299.6	407.5	616.5	197	185.9	287.8	327.1	326.1	414	333.3	171	232.6	328.1	282.7	325.4	345.3	505.3	218	489	239.1	369.1	611.4	366.6
220371_s_at	296.5	309.3	291.3	420.9	304.8	203.7	352	314.4	423.9	461	636.7	198.7	375.5	371.7	401.3	345.1	392.8	422.4	293.4	286.1	283.8	378.2	522	390.7	550.9	245.1	901.7	409.4	522.8	642.5	430.8
220385_at	8	5.6	5	6.5	7.1	6.5	5.2	5.6	15.5	8.7	20.9	7.3	12.1	9.2	7.3	9.3	7.5	9	10.2	7.8	6.2	6.6	9.6	9.6	9.6	5.7	16.6	8.6	8.4	18.6	10
220395_at	399.4	320.2	609.8	738.9	576.6	708.7	643.4	543.1	640.5	499.8	865.2	510.6	824.1	515.7	548.2	712.1	476.1	410.9	330.2	522.9	579.5	512.9	542.3	308	783.6	732.4	933.6	759	711.5	764.8	639.4
220402_at	37.9	44.8	44.7	84.7	30.4	32.6	56.6	85.6	5.1	39.7	166.2	44.9	63.3	45.8	62.4	86.4	73	19.6	123.8	17.6	39.5	34	44.9	69.4	146.9	49.6	157.7	173.9	116.1	139.5	94.5
220419_s_at	1449.8	1583.1	1422.8	1025.5	1341.9	1484.4	1338.1	1116.1	1027.3	1074.6	1095.1	1494.7	1431.8	1159.7	1005.8	1438.9	1005.3	1103.6	1145.5	1213.6	1023.3	1014.6	1061	1013.8	1084.9	1160.7	865.4	941	888	1112.8	802.5
220460_at	892	1186.7	1206.4	1051.4	1764.8	1129.5	1325.9	1982.7	1531.2	849.9	1061.3	1524.1	1797.5	1283.7	2445.9	869.5	857.5	1540.5	1001.3	1832.5	1213.8	1650.1	443	698.4	691.1	631.5	775.9	775.3	1138.6	921.1	640.1
220482_s_at	152	139.6	188.8	283.2	104.6	135.4	165.2	193.1	208.7	81.4	207.6	182.8	167.4	81.6	192.4	164.5	92.1	161.2	118.3	148	256.3	179.2	201.1	185.2	122.4	105.2	31.1	87.8	203.9	85.1	73.8
220483_s_at	37.8	127.9	98.6	86.7	63.4	71.7	95.7	118	64.3	110	186.6	81.3	145.5	66.8	120.9	7.3	198	79.8	226.6	100.1	74.7	202.2	174.7	148.3	208.5	157.6	264.5	133.6	221.1	129.9	70.6
220498_at	9.1	43.7	17	18.8	13	17.1	16.8	21.7	21.2	13.3	59.8	16.8	6.3	17	24.9	22.8	26.7	5.8	15.9	18.9	23.8	9.2	10.6	23.5	25.3	28.3	62.9	28.1	28	17.7	37.2
220508_at	63.7	120.4	46.4	37	22.6	31	26.6	27.5	24.3	68.4	67.7	111.8	35	17.1	50.1	126.6	52.3	98	58.3	199.8	28.4	31	108	117.5	212.7	56.7	40.8	50.1	68.4	118.5	76
220523_at	25.6	72.7	55.1	67.1	59.7	38.9	85.6	64.2	105.9	47	182.4	49	64	39.1	49.4	117.3	82.7	69.2	65	86.4	68	11.7	108.7	42.1	96.7	84.5	191.6	119.9	96.7	242.8	105.7
220528_at	13.3	17.6	47.2	12.6	18.1	48.4	16.6	26.1	33.4	87.7	21.6	33.4	15.3	36.3	132.7	73.9	96.8	43.4	12.1	46.9	19.1	79.8	62.3	43	65.9	68.3	75.3	22	33.5	59.9	66.4
220531_at	10.1	11.8	9.1	13.9	8.5	12	15.1	11.5	20.1	21.9	37.8	9.5	10.1	8.2	21.6	12.9	17.2	12	58.1	13.2	17	14.7	30.1	21	46.1	74	26.5	16.1	15.2	16.9	10.9
220543_at	135.2	57.8	45.6	141.4	146.3	117.2	143.3	221.7	115.1	165.1	293	119.1	175.7	97.1	91.5	97	139.6	92.1	117	104.2	152.9	137.7	85.5	188.7	132.3	166.7	242.8	286.6	230.3	306.6	151.6
220615_s_at	383.5	447.6	349.6	198.1	396.3	572.8	369.6	246.9	233.9	99.3	244.5	433.4	277.7	208.3	139.4	352.2	134.1	148.8	123.6	261	31.3	115.6	106.3	119.3	28.4	146.9	37.2	191.9	16	154.3	234.1
220634_at	18.6	19.9	17.6	24.2	15.2	9.4	12.1	19.4	18.8	18.2	62.7	15.2	16.3	18.3	18.3	18	36.7	21.4	15.2	22.7	24.6	15	22.5	21.5	32	21.5	38.9	17.7	20.7	29.8	31.2
220636_at	76.9	85.3	26.9	42.6	95.9	166	39.1	68.6	76.4	37	62.8	95.1	203.5	76.2	48.1	124.6	186.9	94.9	32.8	76.4	98.9	71.8	63.7	63.1	241	101.6	35.6	386	336.6	277.2	122.3
220648_at	204.4	158.9	234.7	611.8	264.5	297.1	597.3	331.6	202.8	353.1	370.8	196.6	406.3	414.6	295.3	177.7	397.4	301	308	294.3	372.5	226.6	604.9	524.2	521	531.3	556.5	413.4	707.1	502.2	581
220659_s_at	591.6	589.2	462.7	692.7	508.4	440.7	324.5	383.3	488.4	325.2	712.4	603.3	538.4	471.9	525.6	770.4	517.2	536.4	452.5	637.8	551.3	277.8	263.7	442.7	265.9	460.6	220.8	184.2	459.1	365.9	296.2
220665_at	192.7	169.3	215.5	143.2	194.5	76.1	201.9	159.9	429.5	95.3	310.6	197.7	126.3	83.1	155.1	163.1	48.3	200.1	157.3	183.2	163.5	171.8	157.1	106.9	314.3	217.4	428	372.7	315.6	209.1	232.5
220695_at	16	34.2	9	25.5	29.1	48	20.4	18.6	124.5	25.8	65.4	26.4	19.3	22.5	30.6	22.2	85.2	45.8	60.1	18.2	25.7	13.7	42.7	65.2	165.6	60.7	195.8	48.1	107	37.6	35.6
220726_at	14.7	7.1	0.9	2.8	1.4	16.4	5.3	3.9	5	3.1	20.4	1.1	2.8	3.1	22.7	5.4	55.9	37.9	4	51.7	64.6	9	8.7	13.2	13.2	22.7	18.4	36	74.2	4.8	17.1
220762_s_at	119.4	146.3	68.4	171	111.4	125.4	24.1	78.2	170	16.5	123.4	78.4	76	113.5	166.1	201.7	82.6	73.1	110.3	131.6	90.9	79.2	133.5	112.8	109	98.1	53.2	68.5	42.4	32.2	96.1
220768_s_at	316.7	282.7	445.8	383	393.4	458.6	388.4	378.5	266.9	227.5	317.5	272.5	397.8	367.7	254.5	240.4	251	302.2	290.9	279.3	305	339.8	286.8	371.4	229.3	329.4	233.4	291.5	294.2	137.6	378.2
220772_at	2.8	4.4	2	1.3	1.2	3.1	5.8	4.8	3.3	3.9	21.7	1.1	3.1	3.7	5.5	15.1	5.1	3.1	4.8	11.1	2.5	3.2	3.6	1.8	4	9	21.1	9	5.7	5.1	5.1
220781_at	47.4	47.7	52.1	23.3	82.9	67.4	134.3	82.7	23.5	27.6	163.6	18.2	47	72.8	85.4	116.2	91.7	40.1	90.5	86.2	87.2	50.8	55	108.7	118.3	41.6	185.9	142.5	90.9	137.4	120.6
220784_s_at	40.7	22.5	42.1	23.6	12.4	29.7	46.7	27.4	3.1	55.6	45.4	45.8	12.1	17.4	33.2	92.5	24.2	58.8	5.5	6.4	46.5	27.3	4.9	63.6	57.3	3	150	55.7	48.2	77.9	57.2
220832_at	5.9	4.7	4.5	7.1	6.8	4.9	6.9	7.6	10.4	6.8	14.5	4.6	6.8	6.2	7.3	7.2	6.9	6.3	7.8	6.8	6.6	4.7	8	7.3	10.3	4.9	14	9.6	10	8.5	11.6
220849_at	29	31.8	108.2	45.7	31.5	11.9	28.5	33.1	55.4	94.1	93.5	32.3	43.5	28.8	29.5	101.1	43.6	34.4	39.8	33.8	115.4	49.8	50.5	223.5	120.9	33.2	71.6	145.4	121.5	82.7	38.5
220866_at	93.6	52.8	80.6	22.6	16.2	95	130.1	136.7	35.9	39.6	443.4	72	130.7	59.8	164.5	121	28.3	70	106.8	19.5	54.4	86.9	129.6	153.8	205.3	95.8	145	134.4	165.7	173.8	121.9
220880_at	65.8	73.8	16.3	65.6	41.8	6.4	87.3	7.5	71.8	105.9	88.8	8.2	26.7	2.7	19.1	24.4	38.4	20.7	42.7	7.6	3	12	64.9	25.4	8.6	9.2	37.9	11	6.8	9.4	4.8
220882_at	17.1	19.1	18.3	34.2	25.1	14.8	35	28.3	29.4	34.7	57.5	19.2	23.3	27	24.9	33.7	60.8	27.4	64.9	26.3	26.6	25.3	39.8	29.7	55.4	43.4	129.9	37.6	57.8	51.1	24.4
220886_at	99.8	73.1	115.3	111.1	155.7	112.3	283.1	42.7	74.5	156.7	197.1	120.2	245.1	86.2	282.6	229.8	126.1	206.3	136.2	179.8	156.5	147	94	195.4	292	127.5	241.9	199.4	136.7	303.7	134.9
220894_x_at	11.3	11.6	15.6	10.6	10.4	13.3	15.3	14.1	17.9	42.2	25.4	9.5	25.4	14.4	21	17.7	14.8	14.9	15.9	14.1	16.3	86.9	11.4	17.4	26.1	11.7	22.6	26.4	16.5	17	21.6
220920_at	222.2	220.5	146	291.1	113.4	211.2	396.5	169.4	356.5	256.4	442.7	221.7	97.4	341.4	259.2	30.9	389.6	284.9	260.1	243.3	193.4	188.7	392.7	513.3	595.8	61.3	913.2	109.1	830.9	666.2	409
220937_s_at	73.8	90.2	104.7	124.5	54.8	104.7	98.6	137	100.1	81.6	338	89.9	108.5	91.3	158.7	123.1	107.4	106.7	109.5	94	126.5	149	113.7	87.2	142.5	110.8	156.3	114.5	137	131.5	118.5
220963_s_at	158.4	137.4	79	132.1	14.9	84.6	107	114.9	107.9	121.3	210.5	90.7	107.4	145.8	101	204.4	152.9	143.2	223	144.2	171.3	146.5	151.5	128.8	181.7	144.6	280.5	185.4	290.1	129	167.8
220968_s_at	192.8	197.7	210	150.7	207.5	177.1	162.1	161.2	270.7	268.3	320.5	186.3	175.8	226.6	291.4	232	409.9	180.4	230.3	232.5	210.8	180.7	331.2	238.7	273.8	159.2	716.3	255.5	311.8	274.2	218.4
220982_s_at	14.9	12.5	13.1	14.3	7.8	14.6	22.6	13.7	5.8	10.6	46.9	9.2	10	8.7	15	26.6	21.1	12.1	32.4	22.8	18.1	10	19.8	22	18.8	7.6	18.3	168.3	44.9	40	15.5
221016_s_at	343	227.7	334.1	462.1	391.4	296.7	664.3	375.2	413.1	465.2	598.3	295.1	449.9	294.9	435.6	570.1	480.4	412.1	587.7	516.4	341.1	404.9	313.8	585.9	541.1	508.2	792.7	607.4	600.2	556.3	337.9
221032_s_at	216.5	325	136.2	363.5	291	149.4	277.6	308.8	248.5	218.2	409.1	377.7	161.4	466.9	439.2	373.7	365.3	209.6	240.7	295.7	287.7	285.7	151	242	720.1	229.7	660.7	424.7	336.7	541.9	555
221048_x_at	17.7	14.4	12.5	11	16.4	17.3	24.5	12.6	17.3	10.5	18	21.2	27.2	25.9	19.7	15.1	73.2	15.7	17.1	21.2	11.6	18	29.6	20.6	23.7	24.9	19.5	26.7	33.5	88.8	34.4
221068_at	7.1	28.5	10.8	29.6	44.7	36.7	16.7	27.1	92.5	52.1	22.7	46.2	64.4	9.5	15.8	14.8	33.3	75.8	28.5	14	13	20.4	121	62.1	14.6	16.6	21.3	21.6	21.8	17.5	14.8
221091_at	52.4	129.4	85.7	161.9	64.5	78.3	69.8	101.9	84.1	107.9	401.7	73.1	95.8	84	199.9	101	108.1	41.5	64	72.8	41.7	91	77.6	137.6	148.3	92.2	181.3	105	87.5	292.3	106.3
221107_at	97.2	141.1	105.2	206.8	163.6	173.9	145.6	134.3	123.1	155.7	352.5	93	207.2	108.9	134.6	255.4	104.5	157.9	147.8	226.9	162.4	115.3	163.7	129.8	148.6	167.9	268	376.1	232	233.3	169
221191_at	136.7	291	211.1	284.3	168.8	113.6	336.9	270.2	253	314.6	627	223.5	215.7	307.5	319.5	245.6	748	307.7	582.9	375.6	217	228.8	377.9	346.3	475.5	384.6	1606.1	309.2	623.8	334.9	265.3
221220_s_at	111.2	116.4	108	120.8	84.9	96.8	145.9	145.5	176.4	88.1	198.7	91	212.1	139.3	176.4	191.1	127.3	90.7	83.6	81.6	172.5	161.7	114.7	179	176.7	127.3	259.6	224.6	170.3	183.7	201
221272_s_at	784	873.4	713.4	689.1	639.7	837.4	753.7	860.2	1069.1	1042.2	773.8	758.9	883.9	485.9	678.8	841.8	654.8	715.7	745.5	803.9	938.5	612.1	548.4	829.6	887.6	439.7	582.6	1372.1	574.7	631.4	527.2
221276_s_at	64	112.1	109.8	127.4	85.1	103.8	172	126.9	169.7	119	57.6	77.3	140.1	162.8	226.2	96.1	226.8	140.2	263.9	139.3	161.3	396.9	103.8	121.3	163.1	138.6	251.6	257.3	232.8	172.3	169.5
221291_at	20.5	14.2	7.2	6.9	18.6	18.8	29.4	26.8	21.7	29.7	43	17.8	21.7	24.8	19.5	27	8.3	23.9	12.3	23.4	41.9	17.7	8.1	13.5	133.2	40.3	132.4	74.9	10.4	11.2	32.6
221318_at	121.1	48.5	105.5	198.2	50.5	185	122.6	25.4	248.6	254	290.3	76	191	87.9	51.1	94.4	83.7	138.2	106.2	156.2	41.3	59.3	208.2	248	187.3	160.8	292.7	221.6	138	345.5	177.4
221329_at	29.6	200.7	100.3	104.5	64	25.9	218.3	86	96.6	139.8	611.8	103.4	110.4	97.9	81.7	197.9	44.3	48	93.6	164.2	95.8	30.3	155.8	164.4	169.1	101.3	245.1	265.7	306.4	260.7	129.8
221382_at	92.8	112.4	32.3	230.3	81.1	62.5	504.3	257.6	80.4	288.4	181.9	211.1	267.4	281	79.3	402.7	289.3	199.8	103.3	216.7	271.9	181.6	230.1	268.1	437.6	119	638.4	245.2	538.1	401.2	156.9
221446_at	97.4	121.2	112.9	138.3	155.5	69.1	126.2	42.4	105.2	56.9	427.7	64.9	107.3	19.8	40.3	167.1	25.3	78.2	121.6	126	217	44.9	110	32.8	258.9	196.8	150.8	183.8	179.2	60.5	171.7
221484_at	920	695.4	1230.8	535.2	700	670.5	629.5	899.1	743.2	436	950.7	747.6	1108.5	816.7	414.2	1131.5	592.1	839.2	430.6	1347.6	1146.1	943.6	449.8	590.4	1204	1457.8	929.5	1183.3	546.8	1209.1	953.1
221494_x_at	2729.1	1711.5	1926.5	1806.9	1830.1	2623.3	1719.1	2482.2	1709.6	1094.2	1255.4	2083.6	2446.8	2346.3	1874.9	1611.5	1513.3	2354.1	1163.2	1339	1526.6	2056.8	1865.9	1657	1207.1	1338.3	1474.8	1618.5	1490.1	1546	2758.2
221502_at	2944	2344.1	2822.8	2229.1	2573.3	2739.6	2162.2	2001.8	1905.6	1911.2	1489.7	2986.6	2747	1828.3	1958.7	2460.7	1525	2347.7	2249.3	1979.6	2350.2	2650	1974.7	1539.9	1787.3	2073.6	900.5	2646.8	1142.5	1811.1	1652.3
221543_s_at	583.7	645.6	580.9	1178.1	638.4	842.5	712.4	588.8	1095.1	917.3	845.8	752.1	923.8	850.3	1574.4	745.4	926.3	791.2	1003	845.4	982.8	1323.1	823.5	813.1	903.3	1090.9	814.1	807.1	1711.5	1168.5	841.3
221562_s_at	386.1	221.2	315.1	247.7	327.5	320.6	297	265.4	430.4	181.8	100.1	385.3	243	297.5	383.5	374.8	393.8	373.6	231	398.4	299.4	241.7	241.2	192	92	255.9	89.1	273.5	183.1	200.4	251.2
221563_at	191.2	221.8	261.2	388	303.5	248.1	477.1	283.4	189.1	312.3	483.1	285.4	357.7	692.9	406.1	299.6	408	399.3	396.7	291.6	392.7	351.3	477.5	555.9	334.4	386.7	340.9	294.1	283.5	367.1	526.5
221580_s_at	1427.9	964.1	1342.2	911.7	1491.7	1376.8	867.8	1609.9	926.6	589.6	450.9	1130.6	1233.4	1215.3	923.9	1149.8	369.7	892.8	717.9	1008.8	630.3	822.4	1153.5	1058.7	806.9	956.6	556.6	541.7	431.9	507.6	788.5
221604_s_at	155.5	177.9	218.4	400.5	253.3	484.9	331.5	316	229	138.2	398.5	384.1	289.3	376.5	348.9	391	419.7	481.8	454.9	368.3	202.9	318.5	294	267.3	28.4	67.1	107.3	39.4	384.4	40.4	407.4
221626_at	179.3	216.9	217.9	192.6	169.6	201	191.9	148.9	243.6	237.4	177.2	265.4	154.8	179.7	266.2	347	279.8	282.7	315.3	257.3	237.6	247.1	363.6	196.2	214.2	206.4	374	351.5	341.1	201.8	259.4
221656_s_at	784	625.3	463.2	634.8	413.4	364.4	458.8	547.2	627.9	1124	951.3	399.2	480.4	392.5	567.1	859.1	640.4	662.6	628.4	569.4	610.8	389.9	630.3	718.2	636.7	671.8	977.3	691.2	708.7	886.8	443.5
221669_s_at	563.7	287.4	607.6	437.6	572.6	474.9	480.4	458.4	546.3	347.6	284.1	438.1	422.5	542.2	381.9	410.6	308.8	348	251.5	382.9	440.7	473.3	471.6	421.1	284	501	300.9	434.5	349.6	334.6	429.9
221698_s_at	207.9	287.8	170.8	353.8	190	180.6	278.5	170.8	187.5	397.3	537.3	204.4	255.7	308.2	273.1	219.5	296.1	371.8	241.3	157	338.7	542.3	344.1	315.6	395.9	199.6	501	205.2	622.4	610	371.8
221716_s_at	73.9	173.5	62.1	141.4	94.4	141.1	72.4	104.6	73.5	231.6	333.9	165.8	30.6	158.5	149.3	159.8	257.3	46.3	35.8	134.6	218.3	102.5	226.5	171.9	401.6	277.8	310	60.6	215.3	187.8	181.8
221729_at	5448.5	5263.3	702.6	4064.1	2984	3728.6	3888.7	4766.2	3506.7	661.5	1408.3	2575.9	3038.8	2158.7	2058.4	1553.4	869.6	3109.5	876	322	886.3	228.2	1157.4	1021.2	2579.4	320.9	347.4	3872.2	919.8	793.2	335.2
221748_s_at	2133	3463.9	1887	3212.4	2436.5	1643.1	3205.7	2137.7	2623.2	3654.4	4814.9	1747.1	1776.8	2957.3	3181.5	2224.5	6172	2571.4	5469.5	2377.1	2424.2	2002.2	3295	4075.4	5174.3	2660.8	7996.3	3147.2	6137.1	5122.1	2866.9
221760_at	1691.6	1571.2	599.2	840	1232.9	1518.4	787.1	969.9	789.9	676.8	336.3	1951.7	1286.7	773.1	1245.8	1005.8	654	1061.2	757.5	780.6	808.5	493.5	594.6	473.9	579.2	569.5	190.7	835.6	441.8	549.8	551.5
221791_s_at	9417.8	12925	9401.4	9538.4	9697.4	7807.9	11893.1	8916.2	9447.4	9449.4	5269.3	10383.9	7807	9323.9	11086.8	10528.4	9256	10388.9	9562.7	9872.7	7902.2	11529.8	9398.9	4558.5	8126.6	7926.5	5207.4	7849.3	5921	8121.3	7117.9
221805_at	10007.6	4129.9	7529.7	909.2	4620.3	6922.8	1813.5	1838	1660.6	2708.8	1021.6	5259.2	2376.9	2206	2122.2	5687.7	1567.5	4191.9	1331.5	5288.1	1506.3	2097.2	1409.1	561.5	929.5	1271.9	514.3	1594.9	342.2	663.6	2972.1
221823_at	585.3	649	679.7	527.7	750.9	570	849.9	769.4	763.7	898.4	619	526.6	730.1	715.7	443.8	746.3	682.9	491.1	792.9	606.1	841.4	598.5	862	440.5	450.9	473.2	626.1	551.3	370.5	625	597.3
221827_at	472	468.7	333.1	427.7	391.5	554.9	492.7	95.9	300.6	734.9	526.3	431.8	492.4	408.8	495.9	379.6	721.4	656.2	442.7	358.7	280.2	568.2	201.5	419.8	615.5	271.2	635.4	697.5	629.7	539.2	613.6
221851_at	145.3	106.9	96.7	139.7	101	173	82.9	96	304.5	24.4	248.6	221.5	165.7	177.6	229.6	189	146.1	183.5	172.7	149.9	107.3	202.6	43.7	148.5	249.8	173.9	205.6	205.1	95.8	184.3	205.6
221878_at	25.1	117.9	32.5	181.6	126	149	120.2	168.3	310.1	50.1	89.2	38.8	176.4	234.1	261.7	32.2	222.8	311.5	275.5	61.5	68.1	254.2	351.4	323.4	303.2	149.3	366	399.8	286.6	198.3	235.1
221884_at	141.7	214.9	102.5	145.2	183.9	101.3	157.5	99.4	143	351.6	375.6	149.2	127.1	138.6	101.8	226.7	150.2	124	438.7	183.5	211.6	130	335.9	424.4	416.4	253.1	161.3	335.8	316.1	435	106.1
221901_at	490.6	638.5	610.8	343.6	419.8	657.3	486.7	691.7	621.2	547.2	618.8	677.5	532.4	405.9	136.8	567	507.4	639.2	526.5	995.4	691.5	283.7	568	83.5	632.3	91.7	110.6	587.6	152.3	201.8	50.2
221911_at	1869.5	870.5	567.4	414	873.9	841.4	500.2	298.1	472.4	813.1	311	607.7	247.9	659.9	358.3	1519.1	355.7	1091.7	630.8	773	486.7	526.5	494.2	322.3	266.3	270.1	26.9	277.1	100.2	196.8	149.3
221968_s_at	9	18.9	13.4	10.7	8.5	13.4	8.9	8.1	10	15.8	37.1	6.4	16.3	6.2	11.9	11.6	16	27.2	15.9	11.8	16.3	4.9	15.5	12.2	38.2	14.9	25.9	43.5	14	13.9	8.8
221969_at	17.7	31.8	13.9	12.4	66.2	70.4	35.8	37.7	23.6	36.9	49.1	15	25.1	27.9	90.6	18.8	72.2	24.2	95.9	35.5	98.8	74.5	30.5	37.9	210.2	26.3	93	167.8	74.2	31.1	117
221973_at	448.8	543.9	482.9	379.3	404	392.1	311.7	300.9	547.1	615	443.3	321.3	396.5	341.2	243	585.6	331.4	429.6	300.3	662.5	428.9	570.4	539.1	170.4	348.9	204	82.5	363.9	253.9	290.5	318.6
221985_at	163.3	241	287.4	406	345.8	219.5	471.1	275.5	227.3	232.1	515.1	228.8	265.7	287.8	272.3	350.7	303.8	256.4	318.9	230.3	167.4	200.4	375.8	338.9	309	394.8	619.3	358.7	441.7	456.8	292.4
222007_s_at	6.9	10.1	6.6	9.6	7.1	7.1	16.5	9.4	17.9	8.8	32.2	8.6	4.6	11.2	27.1	18.3	9.9	7.4	12.6	19.6	6.2	12.9	12.5	13	12.6	12.2	21.4	18.7	10.8	19.9	10.3
222069_s_at	10.3	9.7	3.7	27.6	14.9	10.5	7.2	4.3	9.9	103.6	61.3	4.3	23	74.4	4.5	20.8	11.7	15.1	6	24	11.6	7.8	12.2	13.8	20.3	13.7	177.3	20	18.7	108.4	11.2
222102_at	11.9	19.3	12.3	35.3	14.4	12.5	25.1	31	49.1	10.6	108.8	21.4	11.2	12.5	19.1	60.8	31.7	18.6	71.6	14.6	15.8	15.2	72.6	39.2	64.3	39.7	61.8	82.2	39.8	81.9	20.6
222126_at	339.2	405.8	455.1	894	387.3	480.5	350	352.1	464.5	496.3	435.7	803.3	504	424.3	703.2	643.2	558.2	409.7	540.8	510.6	749.5	747	403.5	845.7	564.7	507.7	554.5	565.2	681.5	668.2	733
222144_at	47.2	177.7	317.3	97.9	61.7	104.1	30.6	17.8	58.5	51.6	135.3	182.6	87.4	30.4	131.7	80.4	74.6	21.6	89.8	175.3	182.4	47.3	108.8	43.9	21.5	49.9	48.9	24.9	33.1	40.7	21.3
222163_s_at	328	183.5	161.5	179.7	149.2	156.7	232	213.5	96.2	276.2	127.9	136.2	156.7	171.4	180	143.9	187.4	214	69.7	168.5	114.2	206.9	180.1	170.1	282.7	219	186.5	214.9	226.8	261.4	217.4
222171_s_at	342.1	253.7	756.6	210.5	233	234.7	289.9	173.4	230.3	751.2	180.4	217.9	263.2	138.7	148.7	365.4	233.4	300.2	322	678.4	301.1	231.8	277.9	104.1	177.8	187.8	55.2	450.2	102	141.6	106.9
222176_at	15.8	19.2	4.3	19.2	31.8	12.9	15.9	7.9	14.4	19.4	15.9	9.2	62.6	42.8	13.2	17.6	62.6	14	21.7	7.3	17.9	50.8	22.2	30.2	16.7	66.6	19.4	165.4	33.2	38.6	85.9
222196_at	2.3	1.9	2.6	1.5	6	10.9	7.3	11.4	12.8	32.1	47.7	14.5	27.6	22.7	66.7	23.6	36.2	7.5	45.8	6.5	25.4	16	16	6	31.2	7.8	131.7	34.3	71	11.2	22.5
222201_s_at	523.3	482.9	576.7	406.6	644.1	340.3	687.1	462.6	467.9	664.1	355.4	373.2	484.7	522.7	553.6	424.2	227.9	455.7	496.4	492.6	501.8	515.3	642.5	519.5	332.3	532.4	241.5	282.2	214.3	332.9	226.9
222226_at	6.1	13.9	7.7	11.4	8.7	6.7	5.4	8.5	7.4	20.2	30.2	19	9.1	14	10.1	6.2	19.9	8.1	10.1	8.4	17.1	7.4	9.6	8.7	21.5	18.9	187	75.4	11.7	32.1	6.8
222234_s_at	230.6	443.6	465.8	342	314.6	444.8	318.1	312.6	261.4	185.4	333.7	321.7	169.6	349.8	331.5	438.1	262	624.7	428.3	549.7	267.9	286.4	338.8	77.7	246.7	119.4	264.4	288.9	218	73.6	91.2
222244_s_at	1928.7	2679.1	2094.3	2597.1	2583	1723.1	3052.6	1914.5	2744.1	3720.1	3939.6	1702.1	2541.6	2828.4	2506.8	2194.8	4261.8	2339.7	4199.6	2462.4	2577.6	2812.8	3395.4	3337.5	3465.7	2935.4	3912.1	2983.3	3622.9	3412.1	1917.4
222293_at	43.7	20.1	64.2	89.6	8.2	52.3	33.8	48.6	13.8	75.3	91.3	27.9	53.6	101.5	20.9	80.9	92.3	62	25.5	77.7	97.8	35.3	12.3	36.2	251.5	65.2	263.1	37.5	70	151.2	78.6
222332_at	9.5	5.5	19.9	1.5	2.6	3.6	33.6	7.5	3.8	26.8	71.2	2	2.7	17.6	50.2	6.8	41.3	21.7	4.8	4.5	8.3	51.5	11.7	19.3	27.3	11.6	65.8	130.7	20.7	94.4	14.3
222357_at	428.3	490.7	230.6	495.7	402.2	351	501.5	530.8	744.4	755.6	490.3	388.5	458.5	432	733.6	541.5	757	680.8	732.6	554.3	731.9	643.3	776.5	729.7	613.2	459.2	1414	704.9	901.5	1292.3	540.3
222365_at	156.6	219.8	89.7	229.4	174.6	128.2	194.6	179.2	170.9	137.2	282.8	212.2	213.3	159.7	234.3	191.4	309.6	208.3	239.2	178	210.2	227.4	227.7	225.5	297.3	281.2	172.1	223.5	238.5	318.8	261.1
32069_at	357.1	321.9	222.6	416	301.7	192.9	432	375.9	320.5	480.5	231.9	208.2	318.2	276.4	204.7	441.1	341	287.5	410.2	412.3	272.9	349.7	445.9	473.3	434.9	495.8	564.6	437.4	429.7	457.7	203.6
32099_at	972.6	1396.4	1233.8	1324.5	1208.9	946.6	1097.6	763.9	1202.4	2767.2	871.6	1004.5	881.9	1107.1	1011	1591.2	1472.2	806.4	1813.6	1519.4	1337.4	998.7	1236.7	1650.4	1619.7	1542.8	1466.9	1553	1650.1	1656.6	1052.5
33322_i_at	896	930.1	816.7	1182.6	832.4	844.1	1069.6	1639.9	1022.2	1213.6	1062.3	1098.6	1193.1	1212	1540.2	1143.8	1971.8	1043.6	1029.4	962.5	1155.8	1210.6	821.1	957	1612.4	1034.8	2093.1	1251.4	1371.7	1807.7	1827.6
34689_at	573.6	677	859.7	851.5	693.2	826.4	702.9	667.3	979.2	1027.4	1816.1	706.4	844.1	1064.9	708.1	956.6	1181	810.7	797.9	1011.5	690.5	996.1	681.6	793.7	839.1	709.3	1499.2	1108.9	1163.6	1072.6	1023.6
35150_at	469.8	331.1	422.6	539	419.4	411.7	790	649.1	522.7	685.3	1205.2	784.6	749.8	411.3	550.2	707.1	622.2	397.1	366.2	503.7	568.8	569	429.7	478.7	611.6	542.1	622.3	806.7	753.6	713.5	741.4
35265_at	942.5	676.8	1107.9	1085.9	1066.5	1072.7	1029	756.2	1066	957.8	1059.5	1074.6	1069.7	875.8	603.9	1066.5	1137.8	1119.7	1177.1	924.8	1128.5	718.2	1185.5	1463.3	555.7	856.2	696.9	810	967.2	909.1	872.7
36829_at	411.7	607.4	847.7	834.7	1430.4	854.2	1079.1	946.4	1035.3	1056	1530.6	986.9	1085	591.5	1223.9	1187.4	1265.6	940.4	1283.4	1191.8	1057.9	901.2	983.5	1194.5	820	1182.3	2176.8	1171.7	1756.4	1599.7	1126.1
36907_at	1134.1	1103.5	1044.3	1200	1154.1	1188.3	1547.6	1105.5	990.1	1699.3	1422.1	1044	1186.7	1387.2	951.3	1320.9	1726.5	1289	1316.1	1221.8	1183.5	850.2	1021.2	1508.2	1765.9	1243	2883.1	1708.4	1892.5	1773.8	1273.6
37004_at	11.5	26.7	13.4	35.4	93	13.7	17.2	34.3	30.5	68.1	112.9	39.7	46.4	74.3	24.5	47.4	21.6	26.1	24.1	16.8	69	18.7	162.1	82.2	168.4	60.3	194.1	90.2	98.1	57.8	74.9
37152_at	1263.6	2247.9	1002.6	1852.2	1286	1251.1	1199.6	1369.8	2299.3	2357.1	2689.3	1451.6	1567.4	1125.2	1578.5	1795.7	2528	1762.6	1797.3	1478.9	2203	1470.4	2203.1	2228.5	1542.9	1848.3	2640.6	2124.6	2188	2408.8	1786.5
37512_at	239.7	141.8	219.9	156.1	231.8	226.4	177	220.6	193.8	192	121.2	128.1	286.3	187.8	342.5	155.1	99.2	184.6	181.4	135.5	150.6	340.6	238.1	330.9	197.8	189.4	78.1	116.6	129.5	124.9	95.7
37590_g_at	1138.9	1423.5	888.4	1110.7	1018.7	1529.7	838.1	1080.6	1309.4	1369.9	2179.1	1210.9	1541	1282.5	1519.8	851.9	1962.5	1610.9	1535.8	1661.1	1346.5	1413.6	735.5	1140.9	1287	405.4	2341.8	1665.7	2625.3	1751.4	1597.9
37872_at	239.2	261.9	303.7	383.1	269	218.2	329.4	255.2	291.6	293.5	596.3	290.2	235.5	297.6	332	366.2	416.6	316.2	370.4	342.7	304.8	279.9	312.7	372.5	322.2	352.6	782	445	447	441.4	292.7
38037_at	134.6	171.4	214.8	259.4	161	144.7	264.1	225	225.7	183.7	273.8	128.9	180.3	251.2	201.4	148.3	216.9	170.7	267.8	167	229.4	181.5	293.7	300.7	242.9	307.6	388.8	248.4	400	335	380.8
38269_at	521	486.7	431.1	595.1	708.6	398	844	782.5	661.1	873.3	1120.1	424.1	545.9	415.3	630	628.7	997.7	556.1	848.9	622.5	542.3	557.3	499.8	714.5	864.8	871.6	949.8	811.7	1066.2	1025.1	485
38691_s_at	260.5	301.2	357.1	445.7	521.3	312.2	674	525.4	388.1	576.2	820.8	300.3	457.3	785.6	633.6	709	916.8	545.6	857.5	637.9	434.6	297.1	446.7	504.5	975.1	409.4	1207.2	553.8	1038.7	673.1	542.1
39549_at	628.3	669.1	434.7	617.5	497.7	539	403.6	299.9	612.2	751.9	383.9	442	515.3	210.7	534	366.3	403.6	576.2	541.9	385.7	604.5	500.5	430.1	546.9	389.4	298.9	126	470.3	317.9	223.8	335.7
39966_at	3629.7	3534	4688.5	5539.7	3304.6	4053.9	4295	4396	4202.5	4428.5	4660.7	3904.8	3453.4	3673.8	3241.8	6303.8	3340.8	5649.1	3978.2	5708.9	4407.7	3985.6	3228.5	4169.4	1727.7	1363.6	2843.6	3696.3	2607.3	3037.9	2206.8
40472_at	1167.9	1219.5	1153.3	760.5	941.4	1055.9	839.1	609.6	141.4	1020.9	259.7	919.1	404.8	641	250	1810.8	474.6	982.1	912	1469.4	449.7	366.8	583.2	296.8	298.5	590.6	76	661.6	154.7	66.8	365.7
41512_at	190.5	206	164.9	205.2	188.1	183.5	224.1	209.2	207.5	213.2	214	177.8	225.3	169.3	264.7	165	207.8	241.5	341.8	304.1	255.4	192.2	220.1	233.4	166.7	207.4	266.6	343.9	292.1	292.2	242.3
43511_s_at	1826.7	2169.4	1485.4	1686.4	1769.8	1938.9	1899.5	1955	1945.7	1938.9	2661.8	1979.4	1723.2	1634.8	1184.1	1471.4	1656.2	2187.6	2337.8	2176.5	2289	960.6	1394.8	1475.6	1718.6	1236.7	1548.3	1545.1	1691.7	1689.4	1252.8
47550_at	714	720.7	372.9	583.3	445.1	488	544.8	573.9	580.4	695	677.7	371.7	529.7	318.3	391.3	543.8	555.1	618.6	487	571.1	429	241.3	504.4	292.7	462.9	276.6	470.4	366.5	324.1	309.7	300.4
48031_r_at	434.9	633.1	577	622.8	587.9	378	563.1	427.4	667.2	634.4	1283.5	377.5	601.1	1115.8	771.3	504.2	967.2	603.8	634.1	647.9	793.9	868.6	969.4	658.3	830.7	477.5	1685.3	752.9	1375.2	948.2	757.2
52651_at	243.1	97.8	169.4	411.5	194.4	243.7	263.6	242.2	275.4	255	315.7	333.3	269.8	219.3	445.1	338.7	338	283.8	338.9	259.8	366.3	192.6	410	347.5	301.9	360.4	370.5	246.2	443.3	383.1	377.9
52837_at	810.8	796.8	912	388.7	635.2	614.8	762.2	744.9	759	712.1	802.6	591	511	356.3	307.2	619.9	671.3	676.8	678.4	731.5	550.9	508.1	525.6	369.7	856.9	213.7	541.1	557.4	416.4	502.6	177.5
54632_at	337.9	329.7	285.3	325.7	374.8	360.3	469.1	301.4	247.1	426.7	565.2	341.1	213.9	411.2	322.4	178.5	509.9	361.3	409.9	314.7	389.1	220.9	274.4	323.5	612	383.4	565.4	290.9	594	378	377.2
55093_at	481.3	552.1	382.4	566.7	538.1	545.7	621.6	464.7	400.5	501.7	592.9	454.1	272.3	385.4	354.7	428.4	531.1	451.1	328.6	399.3	355.5	345.9	276.9	226.3	441.8	414.9	452.1	364.3	425	389.5	416
55662_at	174.6	290.1	194.8	167	128.8	167.8	189.8	172.5	259.4	224.1	205.1	202.9	185.3	209.4	263.6	200.6	240.4	189.4	309.3	219.6	224.1	211.5	306.2	256.5	358.3	264.3	343.2	231.3	299.7	311.8	226.9
64899_at	1799.1	1653.8	1318.8	1666.9	1624.8	1819.6	719.8	1475.4	1638.7	299.9	2149.7	3157.6	1219.9	1093.3	1321.5	866.8	1821.2	2652.8	2031.6	1737.1	2067.5	1294.6	1170.3	1318.3	807.7	1167.1	580.2	920	1601.3	491.4	938.6
89948_at	270.7	254.6	198.2	127.3	227.9	259.2	225.5	286.5	363.5	331.9	275.4	265.3	323.4	206.1	268.5	277.8	301.3	301	212.7	242.7	204.1	216.7	289	204.6	356.4	202.5	519.3	379.2	299.1	333.8	305.4

## Sheet: 1372 norm. +heat map+GO
This dataset contains the 1372 probes. The expression values were normalised, the samples were sorted with the MA algorithm, as in the 50 probes heat map, and the Gene Ontology was retrieved from source and Affymetrix website.
			0	0	1	0	0	1	0	2	2	1	0	1	3	0	1	2	0	0	1	3	2	2	2	2	3	1	3	2	3	3	3				GSM21215	GSM21221	GSM21216	GSM21218	GSM21217	GSM21233	GSM21220	GSM21214	GSM21210	GSM21222	GSM21231	GSM21225	GSM21229
MA Position	Gene Symbol	Probe ID																																	Symbol	Probe ID	0	0	1	0	0	1	0	2	2	1	0	1	3
1	ZFP36L2	201367_s_at																																	ZFP36L2	201367_s_at	0.000116883	0.000102817	7.41729e-05	9.05579e-05	7.32253e-05	0.000169135	0.000100797	9.15454e-05	0.000133002	0.00011514	0.000158387	8.15615e-05	0.000180464
2	ZFP36L2	201368_at																																	ZFP36L2	201368_at	0.000863224	0.00100529	0.00110276	0.00115031	0.000548789	0.00128371	0.00101458	0.000837334	0.0012044	0.00143621	0.00206809	0.00146065	0.00174874
3	AL049435	213817_at																																	AL049435	213817_at	5.6935e-05	1.49352e-05	4.62225e-05	5.27443e-05	2.36069e-05	0.000135324	6.17838e-05	7.08966e-05	6.5609e-05	6.23887e-05	6.70325e-05	3.53226e-05	8.58636e-05
4	KRCC1	218303_x_at																																	KRCC1	218303_x_at	0.000625096	0.000584515	0.00050419	0.000607046	0.000539681	0.000645667	0.000855424	0.000640347	0.000556501	0.000780788	0.000703545	0.00100146	0.000991659
5	NUP160	212709_at																																	NUP160	212709_at	7.37459e-05	8.50518e-05	0.000103904	0.000147359	0.000104628	0.000156674	0.000140054	0.000175868	0.000104293	0.00013526	0.000130591	0.000180607	0.0002559
6	BRD1	204520_x_at																																	BRD1	204520_x_at	0.000413215	0.000395782	0.00031597	0.000471047	0.000350461	0.000513914	0.000395025	0.000530665	0.000483917	0.000558201	0.000436178	0.000667579	0.000685124
7	AU150728	219540_at																																	AU150728	219540_at	0.000105861	0.000155876	0.000124886	0.000165211	0.000119055	0.000133499	0.000129852	0.000200128	0.000175011	0.000210752	0.000175505	0.000169868	0.000226778
8	RHOQ	212122_at																																	RHOQ	212122_at	0.000100231	8.81961e-05	0.00017436	0.000188743	9.58121e-05	0.000178501	0.000114018	0.000202326	0.000151331	0.000246427	9.59303e-05	0.000180962	0.000202634
9	SSPN	204964_s_at																																	SSPN	204964_s_at	8.54025e-05	0.000295402	0.000297543	0.000220471	0.000188346	0.000196041	0.000102511	0.000340037	0.00037419	0.000488288	0.000394314	0.000330417	0.000538104
10	SYNC1	221276_s_at																																	SYNC1	221276_s_at	5.07499e-05	8.15932e-05	5.98493e-05	8.90972e-05	8.16771e-05	7.62736e-05	6.94558e-05	0.000109368	0.000113701	0.000118437	0.00010754	0.000144485	0.000159233
11	GMPR	204187_at																																	GMPR	204187_at	0.000159704	0.000185196	0.000246907	0.000210166	0.00017217	0.000190565	0.000182903	0.00033776	0.00032691	0.000548141	0.000219063	0.00035509	0.000500433
12	C1S	208747_s_at																																	C1S	208747_s_at	0.000145668	0.000275279	0.000290652	0.000324986	0.000184703	0.000286125	0.000382864	0.000251868	0.000512707	0.000529965	0.000559734	0.0003203	0.000639843
13	DMN	212730_at																																	DMN	212730_at	0.000885427	0.000976917	0.000930955	0.00150053	0.00101524	0.00172255	0.00155455	0.00132097	0.00238431	0.00202349	0.00235588	0.00171199	0.00229361
14	DYNLT1	201999_s_at																																	DYNLT1	201999_s_at	0.000659035	0.000658876	0.000798404	0.000676993	0.000780268	0.000895124	0.000869462	0.000760549	0.000945937	0.000844529	0.0011304	0.00117843	0.000906829
15	HIST1H1C	209398_at																																	HIST1H1C	209398_at	0.0001601	9.53492e-05	0.000118615	0.000100458	0.000201679	0.000155405	0.000115406	0.000155611	0.000201287	0.000139656	0.000186013	0.000225159	0.000102585
16	MSX1	205932_s_at																																	MSX1	205932_s_at	0.000370474	0.000377388	0.00022399	0.000373348	0.000571084	0.000604395	0.000505289	0.000549194	0.000539145	0.000519736	0.000506091	0.000440556	0.000350594
17	AFF1	201924_at																																	AFF1	201924_at	0.000963851	0.000754147	0.000951162	0.00111948	0.00134545	0.0010418	0.00166294	0.00125102	0.00109029	0.00115334	0.00147455	0.00139844	0.00109424
18	SLC33A1	203164_at																																	SLC33A1	203164_at	0.000208233	0.000193371	0.000222673	0.000285549	0.000232426	0.00029565	0.000309409	0.000246764	0.000291307	0.000322003	0.000257368	0.000303615	0.000280607
19	CSNK1A1	208865_at																																	CSNK1A1	208865_at	0.00210009	0.00170709	0.00226614	0.00261279	0.00203843	0.00242941	0.00268804	0.00300765	0.00267067	0.00231776	0.00245953	0.00257367	0.00269089
20	ALDH3A2	202054_s_at																																	ALDH3A2	202054_s_at	0.00059988	0.000608411	0.000566207	0.00049393	0.000619682	0.000663843	0.000775032	0.000690045	0.000769142	0.000672411	0.000817356	0.000737781	0.000786676
21	FDFT1	208647_at																																	FDFT1	208647_at	0.00214728	0.00187413	0.00158287	0.00321789	0.00171631	0.00216471	0.00209388	0.00276552	0.00259022	0.00211902	0.00303655	0.00341733	0.00338381
22	BIRC2	202076_at																																	BIRC2	202076_at	0.00109969	0.000830867	0.000750632	0.00120947	0.00103725	0.000913776	0.0010145	0.000883578	0.00081326	0.00113407	0.00118082	0.00130703	0.00160463
23	SAP30	204900_x_at																																	SAP30	204900_x_at	0.000413849	0.00030169	0.000209511	0.000359067	0.000339313	0.000289618	0.000381803	0.000266785	0.000304283	0.000493361	0.000416941	0.000584332	0.000577184
24	TRIP4	203732_at																																	TRIP4	203732_at	0.000295301	0.000257985	0.000305131	0.000317521	0.000230969	0.00031819	0.000349074	0.000302901	0.000282224	0.000325892	0.000392195	0.000471796	0.000376146
25	KPNA1	213741_s_at																																	KPNA1	213741_s_at	0.000216639	0.000112407	0.000196504	0.00021544	0.000177635	0.000227868	0.000290637	0.000194475	0.000160333	0.000179219	0.000238809	0.000210871	0.00028164
26	PPP1CC	200726_at																																	PPP1CC	200726_at	0.00214117	0.00166967	0.0012189	0.00159929	0.0019432	0.00239893	0.00190583	0.00176708	0.00161809	0.00216644	0.001737	0.00162253	0.00275139
27	MYCN	209757_s_at																																	MYCN	209757_s_at	0.000119976	7.80559e-05	0.000115827	0.000128047	6.44819e-05	6.33365e-05	0.000101205	0.000113764	0.000126109	0.000184545	5.18634e-05	0.000111293	0.000210056
28	HMGN3	209377_s_at																																	HMGN3	209377_s_at	0.00236241	0.00313725	0.00226901	0.00339	0.00230867	0.00352994	0.00276003	0.00386367	0.0032343	0.00394689	0.00332875	0.00344928	0.00452822
29	ARF6	214182_at																																	ARF6	214182_at	9.98345e-05	9.34627e-05	0.000104059	0.000102486	0.000102661	0.000107466	8.40652e-05	0.000100574	8.90466e-05	0.000121311	0.000144912	7.9609e-05	0.000184128
30	CPNE3	202118_s_at																																	CPNE3	202118_s_at	7.77901e-05	0.000222298	0.000234752	0.00017219	0.000159638	0.000270728	0.000258235	0.000310359	0.000181824	0.00035176	0.00025991	0.000190192	0.000302495
31	MFAP1	203406_at																																	MFAP1	203406_at	0.000699555	0.000797302	0.000722295	0.000685919	0.000604163	0.000748688	0.000737488	0.000839454	0.000831345	0.000818745	0.000726002	0.000851825	0.00077343
32	TBL1X	201869_s_at																																	TBL1X	201869_s_at	2.11722e-05	2.16167e-05	2.2608e-05	2.20714e-05	1.55922e-05	3.76209e-05	2.59541e-05	7.91404e-05	2.79791e-05	3.12789e-05	1.07625e-05	2.66251e-05	1.38096e-05
33	CCDC121	220321_s_at																																	CCDC121	220321_s_at	4.79745e-05	3.15211e-05	4.04931e-05	6.72692e-05	6.17861e-05	9.08775e-05	4.09716e-05	0.000108583	5.68503e-05	8.25931e-05	8.04221e-05	7.1799e-05	6.27537e-05
34	GPATCH3	218895_at																																	GPATCH3	218895_at	0.000166127	0.000195493	0.000218105	0.000229803	0.000198619	0.000244853	0.000140952	0.000294971	0.000296092	0.000214641	0.000233555	0.000187263	0.000342421
35	CYP2D6	217468_at																																	CYP2D6	217468_at	1.03879e-05	8.56807e-06	4.07254e-05	1.38758e-05	8.0147e-06	0.000100561	6.3661e-06	4.82851e-05	3.05743e-05	1.49631e-05	2.06775e-05	1.278e-05	5.29837e-05
36	ALDOB	217238_s_at																																	ALDOB	217238_s_at	2.2996e-06	7.78201e-06	1.4943e-05	4.05725e-06	7.06751e-06	8.94489e-05	9.14107e-06	4.38884e-05	2.214e-05	1.006e-05	1.10167e-05	2.29863e-05	4.90381e-05
37	SLC19A1	209777_s_at																																	SLC19A1	209777_s_at	4.82917e-05	4.82642e-05	0.000127751	4.68207e-05	0.000205759	7.21464e-05	6.06412e-05	7.84338e-05	0.000247838	0.000147771	7.38968e-05	6.07052e-05	0.000124944
38	AL110206	216465_at																																	AL110206	216465_at	9.27771e-06	4.60632e-05	5.21842e-05	9.49397e-06	6.0766e-05	4.63515e-05	4.92148e-05	7.08966e-05	9.31015e-05	7.21105e-05	1.77115e-05	2.84888e-05	0.000168345
39	AL109698	37590_g_at																																	AL109698	37590_g_at	0.00090311	0.00120244	0.000937536	0.000720892	0.00103718	0.000676145	0.000831429	0.00130417	0.00130642	0.00130272	0.000915744	0.00113822	0.00150111
40	FGFR3	204379_s_at																																	FGFR3	204379_s_at	0.00153685	0.00172996	0.00202311	0.00163345	0.00198852	0.0010137	0.00103523	0.00287654	0.00316513	0.00161289	0.00130574	0.00169291	0.00277788
41	PLA2G2F	215870_s_at																																	PLA2G2F	215870_s_at	0.000122434	6.68938e-05	1.1846e-05	1.85822e-05	7.1768e-05	2.55568e-05	5.07656e-05	2.50454e-05	0.00019853	2.75592e-05	0.000164064	5.68002e-05	8.6897e-05
42	FLJ22222	219254_at																																	FLJ22222	219254_at	8.96053e-06	4.32334e-06	8.74899e-06	7.87107e-06	3.71591e-06	5.07962e-06	9.38592e-06	7.06611e-06	2.19778e-05	2.55303e-05	1.77962e-05	6.47877e-06	2.49887e-05
43	U92992	217380_s_at																																	U92992	217380_s_at	1.84761e-05	5.188e-06	6.93725e-05	3.50547e-05	2.84158e-05	2.03978e-05	2.22813e-05	2.56735e-05	4.40367e-05	9.60346e-05	5.42362e-05	6.56752e-06	6.44447e-05
44	RAB7A	217268_at																																	RAB7A	217268_at	5.55077e-07	5.97407e-06	9.52324e-06	1.04677e-05	3.20588e-06	5.71457e-06	7.67197e-06	3.61157e-06	1.33813e-05	1.006e-05	5.76259e-06	4.17126e-06	2.49887e-05
45	FLJ20323	209672_s_at																																	FLJ20323	209672_s_at	2.71195e-05	3.45081e-05	3.87898e-05	7.20568e-05	2.95087e-05	4.20656e-05	2.32607e-05	2.21405e-05	5.4093e-05	6.17969e-05	4.12703e-05	2.34301e-05	6.10627e-05
46	GPC4	204984_at																																	GPC4	204984_at	0.00013647	0.00021373	0.000221899	0.000173326	0.000182298	0.000226599	9.75319e-05	0.000186938	0.000257165	0.000382448	0.000265503	0.000113689	0.00034073
47	DSP	200606_at																																	DSP	200606_at	0.000120293	8.29295e-05	0.000150281	0.000120176	8.63402e-05	0.000129689	0.00010398	0.000175083	0.000184743	0.000196042	0.000221436	0.000107565	0.000248478
48	SLC47A1	219525_at																																	SLC47A1	219525_at	5.53491e-05	0.000168374	0.000165766	2.97802e-05	0.000141642	0.000148261	1.62417e-05	7.79628e-05	0.000502083	0.000195282	9.3049e-05	1.64188e-05	0.000716125
49	DLEC1	206798_x_at																																	DLEC1	206798_x_at	0.000107685	0.000150216	0.000141378	0.000101918	7.27881e-05	7.68292e-05	9.72054e-05	0.000116905	0.000194881	0.00019655	0.000172793	0.000131439	0.000149557
50	P2RY10	214615_at																																	P2RY10	214615_at	4.9164e-06	3.15211e-05	3.94092e-05	5.03099e-06	6.04746e-06	5.37328e-05	7.99843e-06	5.1033e-06	2.82224e-05	2.62912e-05	3.33892e-05	3.83401e-05	5.242e-05
51	SPAG6	210033_s_at																																	SPAG6	210033_s_at	6.33581e-05	0.000158077	0.000123492	0.000103703	8.54659e-05	0.000106275	7.14146e-05	0.000130016	9.42369e-05	0.000279481	0.000158471	0.000121499	0.000296953
52	EFCAB1	220156_at																																	EFCAB1	220156_at	0.000110698	0.000138818	0.000171651	0.000157908	0.000110603	0.000106434	8.16983e-05	0.000125541	0.000129434	0.000364272	0.000265588	9.19453e-05	0.000389298
53	TSPAN6	209108_at																																	TSPAN6	209108_at	0.000319566	0.000404114	0.000358167	0.000331964	0.000289404	0.000464785	0.000304593	0.000324177	0.000478565	0.000897365	0.000589819	0.000360326	0.000897528
54	COL21A1	208096_s_at																																	COL21A1	208096_s_at	0.000146223	0.000233775	0.000194801	0.000375377	0.000154684	0.000170008	0.000173843	0.000228942	0.000410847	0.000514833	0.000299401	0.000266695	0.00064595
55	SLC7A11	209921_at																																	SLC7A11	209921_at	0.000530178	0.000587502	0.000293749	0.000423009	0.000253265	0.000343906	0.000515572	0.000622917	0.000928744	0.000947411	0.000572361	0.000485464	0.000776342
56	ALDH1A2	207016_s_at																																	ALDH1A2	207016_s_at	0.000120531	0.000208935	0.000150823	0.000203187	7.37353e-05	9.00838e-05	0.000141278	0.000141322	0.000422931	0.000394452	0.000301689	0.000172175	0.000284646
57	MAPK1	208351_s_at																																	MAPK1	208351_s_at	0.00016692	0.000167431	0.000166541	0.000171135	0.00011308	0.00015096	0.000134178	0.000149409	0.000202342	0.000181671	0.000207199	0.000146527	0.000276567
58	C20orf111	209020_at																																	C20orf111	209020_at	0.000321786	0.000304835	0.000274703	0.000302265	0.000224485	0.000267712	0.000313	0.000425694	0.000316691	0.000326653	0.00035262	0.000440113	0.000578311
59	TIMM44	203093_s_at																																	TIMM44	203093_s_at	0.000180003	0.000175134	0.000167624	0.000182171	0.000123281	0.000111434	0.000164294	0.000247314	0.000216129	0.000186997	0.000200165	0.000225692	0.00028474
60	C14orf109	213246_at																																	C14orf109	213246_at	0.000202762	0.000182052	0.000114898	0.000198156	9.60307e-05	0.000118657	0.000183964	0.000131587	0.00014468	0.000228927	0.000149743	0.000272286	0.00035097
61	ANKHD1	219081_at																																	ANKHD1	219081_at	8.02483e-05	9.00826e-05	7.85861e-05	0.000114414	6.84893e-05	3.32556e-05	5.42751e-05	0.000156397	5.41741e-05	9.2484e-05	7.93204e-05	0.000111293	0.000144108
62	SEC63	201914_s_at																																	SEC63	201914_s_at	0.0001218	0.000167038	0.0001924	0.000192395	0.000160731	0.000151198	0.000166824	0.00021112	0.000130975	0.000225715	0.000212877	0.000201019	0.00036121
63	MXRA8	213422_s_at																																	MXRA8	213422_s_at	0.000418766	0.000424866	0.000350889	0.000301941	0.000295451	0.000234456	0.000297738	0.000418235	0.000307608	0.000563865	0.000541006	0.000398489	0.000601515
64	ITGB4	214292_at																																	ITGB4	214292_at	1.08636e-05	1.7372e-05	1.28525e-05	1.12792e-05	1.49365e-05	1.07148e-05	1.37116e-05	1.75868e-05	2.0518e-05	1.82601e-05	1.93216e-05	1.34013e-05	5.23261e-05
65	PDLIM4	214175_x_at																																	PDLIM4	214175_x_at	0.000107368	0.000164758	0.000284768	0.000147684	0.000152061	0.000225567	0.000180373	0.000123186	0.000148411	0.000209568	0.000395755	9.85128e-05	0.000474129
66	SCML2	206147_x_at																																	SCML2	206147_x_at	0.000326623	0.00032425	0.000465477	0.00040321	0.000453851	0.000687415	0.000493291	0.000478611	0.000400304	0.000528275	0.000487363	0.00035722	0.000771551
67	F9	207218_at																																	F9	207218_at	4.94018e-05	2.65689e-05	4.04931e-05	4.59281e-05	5.82888e-05	7.13528e-05	4.29304e-05	3.43884e-05	6.11486e-05	6.5432e-05	7.99984e-05	2.75126e-05	6.77327e-05
68	PAX3	216059_at																																	PAX3	216059_at	1.15773e-05	8.25364e-06	1.61043e-05	1.37135e-05	9.18048e-06	2.16677e-05	8.73298e-06	2.15124e-05	1.83283e-05	2.58685e-05	4.04229e-05	1.3135e-05	3.25981e-05
69	AL042733	213473_at																																	AL042733	213473_at	8.31822e-05	0.000163894	0.000168166	0.000132023	0.000153737	0.000136991	0.000133362	0.000208686	0.000175822	0.000218022	0.000220504	0.000226402	0.000222456
70	PADI4	211412_at																																	PADI4	211412_at	6.74022e-06	4.16612e-06	6.42625e-06	1.85011e-05	4.22594e-06	8.9687e-06	4.08083e-06	6.90909e-06	4.24147e-05	2.47695e-05	2.76266e-05	3.93164e-05	1.43732e-05
71	NM_014403	220937_s_at																																	NM_014403	220937_s_at	5.8521e-05	8.23006e-05	6.96048e-05	8.49589e-05	6.57206e-05	9.77033e-05	4.47259e-05	7.38016e-05	8.65325e-05	9.17232e-05	0.000116099	8.1029e-05	0.000111322
72	NUP98	210793_s_at																																	NUP98	210793_s_at	0.000119024	0.000134809	0.000158179	0.000212032	0.000164447	0.000165167	0.000164866	0.000195574	0.000227969	0.000238142	0.000237961	0.000237584	0.000342421
73	ABLIM3	205730_s_at																																	ABLIM3	205730_s_at	0.0001624	0.00021428	0.000182722	0.000263397	8.85989e-05	0.000194613	0.000171721	0.000237343	0.000495676	0.000301545	0.000277282	0.00030255	0.000271025
74	FLNC	207876_s_at																																	FLNC	207876_s_at	0.000211326	0.000204926	0.000190232	0.000157989	0.000140257	0.000173024	0.000215223	0.000187802	0.000345968	0.000208554	0.000321519	0.000380916	0.000446322
75	GALNT10	212256_at																																	GALNT10	212256_at	0.000245582	0.000303341	0.000342682	0.000296504	0.000246124	0.000271521	0.000377804	0.000286256	0.000391059	0.00040857	0.000345247	0.000534543	0.000472907
76	USH1C	211184_s_at																																	USH1C	211184_s_at	0.000176594	0.000235661	0.000165534	0.000125207	0.000143682	0.000189295	0.000192044	0.000131901	0.000348401	0.000344152	0.000205674	0.000453248	0.00038648
77	SOX3	214633_at																																	SOX3	214633_at	9.57111e-05	3.87528e-05	0.00010313	0.000107274	4.77239e-05	4.98437e-05	6.11309e-05	4.89132e-05	8.39374e-05	0.000113957	8.93202e-05	0.000161259	0.000176518
78	PHLDB1	216019_x_at																																	PHLDB1	216019_x_at	3.21945e-05	3.5923e-05	3.88672e-05	4.17897e-05	2.78329e-05	3.24619e-05	5.34589e-05	2.72438e-05	7.12859e-05	5.17369e-05	4.86431e-05	6.74502e-05	8.46423e-05
79	ICAM4	207194_s_at																																	ICAM4	207194_s_at	2.64851e-05	1.92585e-05	4.18093e-05	4.97419e-05	3.0893e-05	3.23826e-05	3.99105e-05	2.30041e-05	5.27143e-05	3.49985e-05	4.86431e-05	0.000102507	7.0457e-06
80	RGR	207070_at																																	RGR	207070_at	0.000137183	1.80794e-05	4.50612e-05	0.000173082	9.93095e-05	0.000111593	9.89194e-05	0.000121694	0.000133245	9.67109e-05	0.000166692	7.17102e-05	8.29514e-05
81	PTBP1	211270_x_at																																	PTBP1	211270_x_at	0.000401321	0.000401756	0.00032859	0.000427715	0.00021137	0.000429386	0.000542343	0.000675991	0.000465264	0.000551692	0.000549141	0.000730148	0.000718286
82	SP110	208392_x_at																																	SP110	208392_x_at	4.36132e-06	6.99594e-06	2.06724e-05	2.0124e-05	5.46457e-06	8.9687e-06	7.18227e-06	1.41322e-05	9.40747e-06	5.49494e-06	1.16947e-05	1.58863e-05	3.37254e-05
83	LOC440434	215090_x_at																																	LOC440434	215090_x_at	0.000392994	0.000491524	0.000333004	0.000709532	0.000455454	0.000615427	0.000661013	0.000665628	0.000578722	0.000531741	0.000477956	0.00070521	0.000641159
84	IER2	202081_at																																	IER2	202081_at	0.000828095	0.000716259	0.000666782	0.00134806	0.000822819	0.000829724	0.000827266	0.00123594	0.00117642	0.000627268	0.00104854	0.00101442	0.00205819
85	AJ302559	216818_s_at																																	AJ302559	216818_s_at	7.53319e-06	1.28914e-05	4.80033e-06	3.76513e-05	1.37707e-05	1.98423e-05	1.01205e-05	1.66446e-05	1.04618e-05	1.20043e-05	6.56766e-05	1.46438e-05	7.01752e-05
86	FLT3LG	206980_s_at																																	FLT3LG	206980_s_at	1.03086e-05	6.76013e-06	3.79381e-06	9.89969e-06	6.19318e-06	1.75406e-05	8.08005e-06	8.63636e-06	1.38679e-05	1.04826e-05	1.10167e-05	8.96378e-06	1.54066e-05
87	COBLL1	203642_s_at																																	COBLL1	203642_s_at	0.000189043	0.000165466	0.000104523	0.000253578	0.000133263	0.000217074	0.000150746	0.00023381	0.000174606	0.000150561	0.000173725	0.000168625	0.000223771
88	ZPBP	207021_at																																	ZPBP	207021_at	8.39752e-05	1.24984e-05	8.43929e-06	5.66392e-05	1.47179e-05	2.00804e-05	1.12631e-05	3.14834e-05	2.952e-05	7.64219e-05	1.24574e-05	1.44663e-05	5.88081e-05
89	SAP30BP	217965_s_at																																	SAP30BP	217965_s_at	0.000202603	0.000251382	0.000289568	0.000209192	0.000288821	0.000120165	0.00023171	0.000322293	0.000363161	0.000411697	0.000276689	0.00041331	0.000824911
90	VCL	200930_s_at																																	VCL	200930_s_at	7.85037e-06	5.73825e-06	6.5811e-06	1.11169e-05	7.72326e-06	9.92113e-06	7.3455e-06	5.29173e-05	1.26514e-05	1.53858e-05	8.72864e-06	4.57951e-05	1.4749e-05
91	GATA3	209603_at																																	GATA3	209603_at	4.20272e-06	4.55915e-06	1.93562e-06	1.02243e-05	1.00548e-05	1.36515e-05	6.52933e-06	4.40454e-05	6.08242e-06	1.33569e-05	1.53387e-05	4.88126e-05	1.19307e-05
92	CEP350	204373_s_at																																	CEP350	204373_s_at	0.00026049	0.000330146	0.000410041	0.000501152	0.000462667	0.000399861	0.000453217	0.000556338	0.000346779	0.000535968	0.000353552	0.000591254	0.000634677
93	AL049987	213605_s_at																																	AL049987	213605_s_at	0.000242965	0.000294065	0.000292665	0.000371807	0.00041691	0.000340255	0.000861301	0.00067764	0.000316529	0.00028878	0.000271011	0.000908891	0.000556328
94	NEK9	212299_at																																	NEK9	212299_at	0.000269054	0.000411817	0.000408493	0.000585867	0.000472722	0.000476135	0.000688028	0.000648276	0.000465427	0.000502913	0.000478211	0.000814727	0.000503533
95	SAFB2	32099_at																																	SAFB2	32099_at	0.00077124	0.000744086	0.000777731	0.00100117	0.00101743	0.00126292	0.000986664	0.00119292	0.000653981	0.000745536	0.00064736	0.000982554	0.000988747
96	UTX	203991_s_at																																	UTX	203991_s_at	0.000169616	0.000169946	0.00015694	0.000230614	0.0001686	0.000203185	0.000473132	0.000286099	0.000208992	0.000151998	0.000123811	0.000343463	0.000223208
97	ADAMDEC1	206134_at																																	ADAMDEC1	206134_at	4.96397e-05	3.34076e-05	7.32438e-05	4.44675e-05	4.18222e-05	6.44476e-05	6.54566e-05	6.25743e-05	6.02565e-05	3.25469e-05	5.627e-05	4.92564e-05	6.36931e-05
98	CSNK2A2	203575_at																																	CSNK2A2	203575_at	0.000303151	0.000303262	0.000274238	0.000320929	0.000272791	0.000325492	0.000303206	0.000443045	0.000317583	0.000284722	0.000312706	0.000331305	0.000257967
99	MST1R	205455_at																																	MST1R	205455_at	0.000107209	8.32439e-05	9.69357e-05	0.000148739	0.000138946	0.000131594	0.000169763	0.000125934	9.82108e-05	0.000148279	0.000133811	0.00012283	5.47686e-05
100	N4BP1	32069_at																																	N4BP1	32069_at	0.000283168	0.000151631	0.000161198	0.000180629	0.000234539	0.000350097	0.000246237	0.000323706	0.000233159	0.000268998	0.000318553	0.000245306	0.000191267
101	DLG5	210469_at																																	DLG5	210469_at	8.97639e-05	6.72082e-05	8.8961e-05	0.000116443	6.04017e-05	5.59552e-05	2.97085e-05	0.000197066	0.000130569	7.05888e-05	9.44049e-05	4.21564e-05	8.00391e-05
102	AL080106	216121_at																																	AL080106	216121_at	5.36046e-05	2.67261e-05	4.80807e-05	3.75702e-05	2.28783e-05	6.49239e-05	4.79906e-05	5.48016e-05	3.80354e-05	2.62066e-05	7.93204e-05	2.42288e-05	6.93297e-05
103	CCDC52	215094_at																																	CCDC52	215094_at	1.46699e-05	3.30146e-06	2.86471e-05	4.6983e-05	3.78877e-06	1.04767e-05	3.1504e-05	6.28099e-06	3.5278e-05	1.42023e-05	5.2626e-05	1.02063e-05	3.97377e-05
104	SIRT6	219613_s_at																																	SIRT6	219613_s_at	0.000219652	0.000246352	0.000219964	0.000239702	0.000119201	0.000329143	0.000284189	0.000258306	0.000277764	0.000392592	0.00041711	0.000150165	0.00039052
105	RYBP	201846_s_at																																	RYBP	201846_s_at	0.000615104	0.000688904	0.000521842	0.000342432	0.000439862	0.000798532	0.000807107	0.000553512	0.00070329	0.000621773	0.000684817	0.00083727	0.000854315
106	LTBP1	202728_s_at																																	LTBP1	202728_s_at	5.51905e-05	1.50138e-05	2.25306e-05	1.68782e-05	1.30421e-05	1.40483e-05	4.7256e-05	3.22686e-05	1.68686e-05	1.72456e-05	0.000110083	2.49388e-05	3.84225e-05
107	RHEB	213409_s_at																																	RHEB	213409_s_at	0.000259538	0.000128128	0.000136422	6.61332e-05	0.000112716	0.000198026	8.93702e-05	0.000113372	0.000100644	7.07579e-05	0.000179149	0.000147769	0.000192864
108	LMAN2	215656_at																																	LMAN2	215656_at	2.78331e-05	2.06734e-05	2.61695e-05	7.14076e-06	5.9746e-06	1.13498e-05	5.06023e-06	8.71487e-06	1.98692e-05	4.90317e-06	1.39828e-05	8.25377e-06	3.598e-05
109	POLR1D	218258_at																																	POLR1D	218258_at	0.000627713	0.00046582	0.000531985	0.000587084	0.000440736	0.000405496	0.000435098	0.000460396	0.000361701	0.000360721	0.000504735	0.000474548	0.000785924
110	PDSS2	219307_at																																	PDSS2	219307_at	0.000166682	0.000141805	0.000163753	0.000156529	0.000153882	0.000136435	0.00011663	0.000131273	0.000160333	0.000104826	0.000140251	0.000150609	0.000121186
111	C10orf76	218891_at																																	C10orf76	218891_at	0.000381496	0.000328416	0.000371561	0.000402561	0.000392283	0.0001635	0.000206653	0.000458591	0.000620001	0.000401468	9.06761e-05	0.000381804	0.000428285
112	TRPC2	215288_at																																	TRPC2	215288_at	5.23358e-06	1.06904e-05	8.59414e-05	1.80953e-05	9.54478e-06	6.74637e-06	9.3043e-06	1.41322e-05	4.64697e-05	1.15816e-05	1.04235e-05	1.41113e-05	1.87885e-05
113	IRF2BP1	213771_at																																	IRF2BP1	213771_at	0.000319011	0.000479419	0.000538876	0.000403534	0.000516293	0.000341842	0.000318876	0.00049981	0.000516032	0.000280073	0.000260673	0.000455555	0.000842572
114	MED6	207078_at																																	MED6	207078_at	8.21514e-05	9.44059e-05	0.000204014	0.000122042	0.000219384	4.71452e-05	0.000104469	0.000188037	0.000205829	7.54074e-05	6.77952e-05	0.000160283	0.000174639
115	ARHGAP19	212738_at																																	ARHGAP19	212738_at	7.216e-05	0.000184882	0.000128525	0.000121231	0.000169839	8.04008e-05	0.000101858	0.000154198	0.000256354	6.72918e-05	7.29646e-05	0.000284711	0.000236078
116	AP3S2	202398_at																																	AP3S2	202398_at	8.5799e-05	4.22115e-05	6.51142e-05	3.84627e-05	5.50829e-05	2.05566e-05	6.26816e-05	8.51859e-05	8.19099e-05	5.78236e-05	0.000100252	0.000140935	9.25335e-05
117	PIN4	214224_s_at																																	PIN4	214224_s_at	0.000385461	0.000379353	0.000364593	0.000341702	0.000355416	0.000455658	0.000417224	0.000365161	0.000413848	0.000392085	0.000456516	0.000681513	0.000513209
118	HLA-DPA3	213870_at																																	HLA-DPA3	213870_at	9.75349e-05	0.000103917	7.29341e-05	8.95841e-05	0.000120002	2.46044e-05	0.000148053	7.98471e-05	0.000147843	1.31033e-05	0.000113642	0.000206522	0.000103243
119	CDC34	212540_at																																	CDC34	212540_at	0.00160433	0.000504415	0.000665698	0.00051803	0.000580119	0.000421926	0.000509206	0.000689731	0.000751381	0.000427929	0.000460923	0.000681247	0.000679018
120	PER2	205251_at																																	PER2	205251_at	0.000698683	0.00113649	0.000754194	0.000587652	0.00063491	0.000857424	0.000528958	0.00101799	0.000945856	0.000459715	0.000531345	0.000643084	0.00111754
121	ICA1	207949_s_at																																	ICA1	207949_s_at	0.000109747	8.42658e-05	4.87001e-05	0.000134376	2.2514e-05	5.37328e-05	2.49747e-05	0.000169901	9.23716e-05	2.1388e-05	3.00841e-05	4.19789e-05	5.68353e-05
122	AKR1B1	201272_at																																	AKR1B1	201272_at	0.00165897	0.00174985	0.00183117	0.00159069	0.0015013	0.00150555	0.00145465	0.00135442	0.0016236	0.00145396	0.00154861	0.00166629	0.00215551
123	SPATA5L1	222163_s_at																																	SPATA5L1	222163_s_at	0.000260093	0.000123176	0.000105452	0.000131049	0.0001337	0.000114212	0.000121772	0.000132293	0.000173552	0.00013247	0.000180929	0.000152118	0.000204231
124	PLA2G10	207222_at																																	PLA2G10	207222_at	8.41338e-05	0.000117359	7.86635e-05	7.74124e-05	9.74151e-05	0.000179057	0.000137198	7.73347e-05	4.60642e-05	4.70874e-05	8.40661e-05	6.22139e-05	0.000172385
125	HOMER3	215489_x_at																																	HOMER3	215489_x_at	0.000606461	0.000343666	0.000261928	0.000231588	0.000285979	0.000335493	0.000293249	0.000289711	0.000353591	0.00032716	0.000436093	0.000295538	0.00074365
126	UTS2	220784_s_at																																	UTS2	220784_s_at	3.22738e-05	2.3346e-05	3.54605e-05	3.41621e-05	1.63937e-05	7.34163e-05	1.01205e-05	5.02479e-06	4.76861e-05	1.0229e-05	2.32199e-05	1.54425e-05	5.37352e-05
127	GABRA5	217280_x_at																																	GABRA5	217280_x_at	0.000364844	0.00014833	0.000176915	0.000185416	0.000137999	0.000130641	0.000167069	2.61446e-05	0.000102266	0.000114802	0.000225843	8.40465e-05	0.000199346
128	RAB38	219412_at																																	RAB38	219412_at	1.20531e-05	1.30486e-05	1.63366e-05	5.27443e-06	1.84338e-05	1.04767e-05	1.05285e-05	6.12396e-06	1.28947e-05	2.1388e-05	3.69484e-05	8.78628e-06	5.12927e-05
129	TEAD1	214600_at																																	TEAD1	214600_at	9.41252e-05	0.000115315	9.12837e-05	4.26011e-05	0.000143609	0.000135245	0.000102592	4.71074e-05	0.000123108	0.00015893	0.000132116	7.5349e-05	0.0001675
130	KCNC3	207600_at																																	KCNC3	207600_at	0.000131157	6.57147e-05	4.43644e-05	4.17085e-05	0.000109656	0.000170008	8.34122e-05	0.000106384	0.000192123	8.70736e-05	8.12695e-05	3.55001e-05	0.000209774
131	MCAM	209086_x_at																																	MCAM	209086_x_at	0.000214418	0.000174113	4.92421e-05	9.33168e-05	0.000110676	0.000311365	0.000189187	0.00019369	0.000239566	0.000207878	0.0002483	0.000214953	0.000255524
132	NM_031269	208139_s_at																																	NM_031269	208139_s_at	6.71643e-05	1.88655e-05	2.5163e-05	1.34701e-05	6.29519e-05	3.46049e-05	1.32219e-05	6.00619e-05	5.4985e-05	7.1096e-05	5.12701e-05	6.42552e-05	0.000110946
133	ZNF350	219266_at																																	ZNF350	219266_at	0.000105782	6.51645e-05	5.31133e-05	8.34171e-05	0.000133117	9.6354e-05	5.19082e-05	0.000109525	7.34756e-05	0.000131371	8.52525e-05	0.000144663	0.000102116
134	GJC2	214302_x_at																																	GJC2	214302_x_at	1.11808e-05	8.41085e-06	8.12959e-06	8.27679e-06	1.48636e-05	1.92073e-05	9.87562e-06	1.46818e-05	1.01374e-05	1.72456e-05	9.2371e-06	2.10338e-05	2.27341e-05
135	ZNF20	213916_at																																	ZNF20	213916_at	0.000159228	0.00013646	7.39406e-05	0.000148414	0.000130057	0.000193264	0.000167314	0.000171	0.000160414	0.000289372	0.000161098	0.000169513	0.000282955
136	PAPSS2	203058_s_at																																	PAPSS2	203058_s_at	7.49354e-05	7.7034e-05	8.28444e-05	7.66821e-05	0.000107834	0.00011699	6.3661e-05	0.00015043	6.76365e-05	0.000147771	8.62694e-05	0.000115464	0.0001008
137	NM_012348	221382_at																																	NM_012348	221382_at	7.35873e-05	4.91288e-05	0.000163444	2.62098e-05	8.18957e-05	0.000319619	6.61911e-05	0.000170136	0.000162036	0.000226053	0.000218301	0.000249388	0.000147396
138	OR7E12P	216698_x_at																																	OR7E12P	216698_x_at	0.000228612	0.000234718	0.000163986	0.000195722	0.000222299	0.000349621	0.000173762	0.000230983	0.000354889	0.000287258	0.000272622	0.000349676	0.000283425
139	IL15	205992_s_at																																	IL15	205992_s_at	9.33322e-05	6.53217e-05	6.04687e-05	9.94838e-05	0.000120366	0.000138102	9.6879e-05	6.67355e-05	8.26398e-05	9.5781e-05	0.000135421	0.000114932	0.000125789
140	C7orf28A	201974_s_at																																	C7orf28A	201974_s_at	0.000166285	0.000162793	0.000109788	0.000173001	0.000149948	0.000225884	0.000157112	0.000167388	0.000191637	0.000229519	0.000230758	0.000194186	0.000234669
141	POMC	205720_at																																	POMC	205720_at	1.74453e-05	7.38898e-06	9.91036e-06	1.03866e-05	1.01277e-05	5.58758e-05	1.09366e-05	8.55785e-06	9.32637e-06	1.2427e-05	1.83047e-05	1.15375e-05	2.17947e-05
142	CGA	204637_at																																	CGA	204637_at	2.07757e-05	2.28744e-05	3.41443e-05	2.14223e-05	2.60114e-05	0.000125721	3.02798e-05	2.94421e-05	1.44356e-05	0.000214049	3.99144e-05	4.22451e-05	4.50925e-05
143	SFTPB	37004_at																																	SFTPB	37004_at	9.11912e-06	1.0769e-05	3.07376e-05	1.08734e-05	1.94539e-05	3.76209e-05	7.59035e-05	1.31901e-05	2.11668e-05	3.92254e-05	2.90672e-05	6.59414e-05	7.03631e-05
144	GRAP	206620_at																																	GRAP	206620_at	1.04672e-05	7.86061e-06	8.12959e-06	1.25775e-05	8.08757e-06	6.69875e-05	3.10143e-05	8.32231e-06	1.29758e-05	9.89088e-06	9.15236e-06	8.87503e-06	7.89118e-05
145	NM_024934	220849_at																																	NM_024934	220849_at	2.2996e-05	9.35413e-06	2.50082e-05	8.77989e-05	2.31698e-05	8.02421e-05	2.57092e-05	2.65372e-05	2.7898e-05	3.67738e-05	2.80503e-05	2.55601e-05	3.61679e-05
146	RUNX2	216994_s_at																																	RUNX2	216994_s_at	5.45561e-05	6.13914e-05	4.84679e-05	8.31737e-05	6.35347e-05	0.00014969	7.10881e-05	0.000160715	8.99387e-05	0.000123171	5.50836e-05	7.2864e-05	9.79822e-05
147	CHD2	203461_at																																	CHD2	203461_at	6.86709e-05	1.92585e-05	1.54849e-05	0.000123178	0.000122844	0.000224059	9.72871e-05	0.000131351	0.000136327	0.000185222	0.00012576	9.00815e-05	0.000236172
148	H2AFB2	214412_at																																	H2AFB2	214412_at	6.42303e-06	6.28849e-06	6.73595e-06	5.27443e-06	6.26604e-06	9.60365e-06	7.18227e-06	1.89215e-05	1.05429e-05	1.72456e-05	1.11862e-05	8.25377e-06	2.86525e-05
149	SLC35F2	218826_at																																	SLC35F2	218826_at	0.000235115	0.000257907	0.000305673	0.000206514	0.000182735	0.00060757	0.000228363	0.000295992	0.000378407	0.000479919	0.000362535	0.000282758	0.000524388
150	PLA2R1	210194_at																																	PLA2R1	210194_at	1.11015e-06	9.43273e-07	2.01304e-06	2.59664e-06	1.38436e-06	8.65122e-06	1.06102e-06	1.64876e-06	2.91956e-06	2.45159e-06	4.57618e-06	1.15375e-06	4.41531e-06
151	KRTAP5-9	214517_at																																	KRTAP5-9	214517_at	1.25289e-05	1.83152e-05	1.59495e-05	3.09974e-05	1.45722e-05	4.83357e-05	1.61601e-05	2.35537e-05	2.1329e-05	3.11098e-05	2.1864e-05	7.72127e-06	3.25981e-05
152	CYP3A4	205998_x_at																																	CYP3A4	205998_x_at	0.00035398	0.000416927	0.000410351	0.000549839	0.000488241	0.000792658	0.00049019	0.00055469	0.000525196	0.000482963	0.000517108	0.000486795	0.000720728
153	PCGF2	203793_x_at																																	PCGF2	203793_x_at	0.000277697	0.000363475	0.000360412	0.000399396	0.000333193	0.000785436	0.000338301	0.000704099	0.000469238	0.000392338	0.000456855	0.000383312	0.000608467
154	AI693193	213448_at																																	AI693193	213448_at	0.000376739	0.000406001	0.000319454	0.000421305	0.000578297	0.000522328	0.000414613	0.000616086	0.000421065	0.000360045	0.000475329	0.000267405	0.000435612
155	E2F3	203692_s_at																																	E2F3	203692_s_at	0.000160021	0.000180244	0.00023088	0.00016367	0.000241315	0.000236758	0.000155969	0.000314206	0.000228212	0.000219628	0.000200928	0.000152562	0.000227341
156	KRTAP5-8	208532_x_at																																	KRTAP5-8	208532_x_at	4.33753e-05	5.54173e-05	3.67767e-05	2.63721e-05	5.14398e-05	6.58763e-05	5.31324e-05	7.89049e-05	7.03938e-05	8.1325e-05	7.19477e-05	5.36052e-05	7.00812e-05
157	VNN2	205922_at																																	VNN2	205922_at	6.10585e-06	7.38898e-06	4.64548e-06	4.78756e-06	5.9746e-06	8.41312e-06	7.10065e-06	1.3033e-05	9.81297e-06	7.77745e-06	1.39828e-05	5.85752e-06	1.01458e-05
158	ATF5	204998_s_at																																	ATF5	204998_s_at	0.000147254	0.000170968	0.000133712	9.89969e-05	0.00014135	0.000243345	0.000168294	0.000189058	0.000203234	0.000264602	0.000212199	0.000143065	0.000267455
159	CHRNA9	221107_at																																	CHRNA9	221107_at	7.70764e-05	0.000136696	7.2005e-05	8.53646e-05	0.000102807	0.000202708	0.000133525	0.000178145	0.000128055	0.000175162	0.000113811	9.6649e-05	0.000158763
160	EFHC2	220523_at																																	EFHC2	220523_at	2.03e-05	3.05778e-05	3.79381e-05	4.47109e-05	5.29699e-05	9.30999e-05	4.87251e-05	6.78347e-05	5.61204e-05	5.4104e-05	5.44057e-05	3.47014e-05	9.92974e-05
161	AF053356	217450_at																																	AF053356	217450_at	1.99035e-05	2.79052e-05	0.000106536	9.15316e-05	8.21143e-05	0.000126355	3.9176e-05	0.000102851	2.10857e-05	0.000104996	1.92369e-05	1.96138e-05	0.000139693
162	OR52A1	221329_at																																	OR52A1	221329_at	2.34718e-05	2.0359e-05	8.00571e-05	8.13885e-05	0.000146232	0.000157071	5.22347e-05	0.000128917	3.89275e-05	9.33294e-05	7.28799e-05	8.68865e-05	0.000121938
163	SFRS7	211439_at																																	SFRS7	211439_at	0.000108319	2.2953e-05	8.55543e-05	6.51595e-05	9.3262e-05	0.000178739	0.000132219	0.000114157	8.92088e-05	0.000163495	0.000129743	7.72127e-05	0.000186476
164	PRDM2	216445_at																																	PRDM2	216445_at	1.27668e-05	1.5957e-05	1.31622e-05	1.51741e-05	1.97453e-05	2.53981e-05	1.34667e-05	2.34752e-05	1.19215e-05	5.58793e-05	1.83895e-05	2.03238e-05	7.23358e-05
165	IL12B	207901_at																																	IL12B	207901_at	1.53836e-05	6.68152e-06	1.30848e-05	2.07731e-05	2.49184e-05	2.52393e-05	3.16673e-05	1.9157e-05	1.26514e-05	3.30542e-05	3.62704e-05	3.37251e-06	5.03533e-05
166	APBB3	204650_s_at																																	APBB3	204650_s_at	0.000621527	0.000529569	0.000497686	0.000555438	0.000527878	0.000824089	0.000731775	0.000562148	0.000833778	0.000773095	0.000713375	0.000522473	0.000882873
167	HOXA9	214651_s_at																																	HOXA9	214651_s_at	2.66437e-05	7.54619e-06	1.70334e-06	4.78756e-06	8.37901e-06	5.84156e-05	4.24407e-06	3.41529e-05	3.06554e-05	3.74501e-05	2.94909e-05	2.87551e-05	4.63137e-05
168	CRP	205753_at																																	CRP	205753_at	4.05999e-05	1.17909e-05	1.33945e-05	8.35794e-06	1.32607e-05	2.71442e-05	3.19937e-05	9.13099e-05	7.27457e-05	8.70736e-05	0.000111523	2.71576e-05	6.83903e-05
169	EDC4	202496_at																																	EDC4	202496_at	0.00019848	0.000174348	0.000164682	0.000270538	0.000236069	0.000193105	0.000230567	0.000343413	0.000395844	0.000248371	0.000244148	0.000219923	0.000382159
170	VIPR2	205947_s_at																																	VIPR2	205947_s_at	8.32615e-06	5.73825e-06	8.59414e-06	4.30069e-06	6.77607e-06	4.12719e-06	1.16712e-05	2.15124e-05	1.83283e-05	6.59392e-06	4.49143e-06	9.23003e-06	2.71494e-05
171	ADAM30	221446_at																																	ADAM30	221446_at	7.7235e-05	5.43168e-05	5.02486e-05	9.16127e-05	8.83075e-05	0.000132626	0.000126914	9.89256e-05	6.34193e-05	9.07087e-05	3.59315e-05	1.75726e-05	0.0001613
172	LUZP4	220665_at																																	LUZP4	220665_at	0.000152805	5.98193e-05	0.000153069	0.000174868	0.000123354	0.000129451	0.000158744	0.000143835	0.000162279	0.000106771	0.000135506	7.37515e-05	0.000218417
173	RIBC2	206526_at																																	RIBC2	206526_at	8.08826e-06	4.32334e-06	5.41973e-06	9.57511e-06	1.39164e-05	1.32546e-05	5.95802e-06	1.08347e-05	1.12727e-05	7.4393e-06	1.67793e-05	4.70376e-06	1.33399e-05
174	KCND1	206842_at																																	KCND1	206842_at	3.32253e-05	1.43849e-05	1.01426e-05	1.70405e-05	2.50642e-05	4.34149e-05	1.8527e-05	2.2219e-05	1.71119e-05	1.919e-05	2.65249e-05	1.6685e-05	2.81828e-05
175	POMZP3	210910_s_at																																	POMZP3	210910_s_at	0.000336456	0.000124905	0.000330449	0.000167483	0.000338512	0.000283427	0.000270396	0.000253673	0.000464616	0.000175162	0.000339569	0.00030681	0.000225275
176	MTSS1	210360_s_at																																	MTSS1	210360_s_at	8.0724e-05	7.39684e-05	3.53831e-05	7.74124e-05	6.73235e-05	0.000104926	7.28021e-05	7.019e-05	7.16103e-05	4.13388e-05	0.000145082	0.000120967	6.18143e-05
177	RPL28	213223_at																																	RPL28	213223_at	0.000451674	0.000333054	0.000334088	0.000406374	0.000518843	0.000418989	0.000484885	0.000402611	0.000449369	0.000267138	0.000467702	0.000422007	0.000444067
178	PPIE	202494_at																																	PPIE	202494_at	0.000154946	0.000169239	9.80197e-05	8.1713e-05	0.000139237	0.000237631	0.000172211	0.000234124	0.000215236	0.000138388	0.000232538	0.000138273	0.000268676
179	RFX2	208031_s_at																																	RFX2	208031_s_at	9.5156e-06	2.16953e-05	8.05217e-06	5.43672e-06	1.36979e-05	1.03973e-05	7.18227e-06	1.62521e-05	1.3949e-05	1.34415e-05	1.24574e-05	8.25377e-06	7.03631e-05
180	XYLB	208318_s_at																																	XYLB	208318_s_at	6.02655e-06	6.60291e-06	5.41973e-06	4.30069e-06	5.9746e-06	1.03973e-05	5.71317e-06	6.83057e-06	7.4611e-06	4.90317e-06	5.67785e-06	7.27752e-06	2.14189e-05
181	UBE2I	213536_s_at																																	UBE2I	213536_s_at	1.13394e-05	1.83152e-05	4.87776e-06	4.05725e-06	1.56651e-05	8.49249e-06	1.28954e-05	9.02892e-06	6.69877e-05	6.25577e-06	9.91505e-06	3.81626e-06	2.69615e-05
182	FCGR2C	210992_x_at																																	FCGR2C	210992_x_at	7.69178e-06	1.91799e-05	1.65689e-05	5.03099e-06	1.52279e-05	2.65886e-05	2.11387e-05	1.5624e-05	2.1329e-05	9.13005e-06	3.82196e-05	1.57975e-05	3.30678e-05
183	S80491	216974_at																																	S80491	216974_at	1.98242e-06	2.75121e-06	1.00652e-06	7.30305e-07	3.06016e-06	4.12719e-06	8.16167e-07	2.98347e-06	1.37868e-06	7.60837e-07	6.10157e-06	1.68625e-06	4.79108e-06
184	BTN2A2	205298_s_at																																	BTN2A2	205298_s_at	0.00020744	0.000196044	0.000137429	0.000144276	0.000161533	0.000253505	0.000212775	0.000192198	0.000211668	0.000194605	0.000197454	0.000195073	0.000218229
185	PURA	213806_at																																	PURA	213806_at	1.12601e-05	6.68152e-06	9.75551e-06	1.14414e-05	1.36979e-05	1.95248e-05	6.52933e-06	1.42107e-05	8.19099e-06	1.45404e-05	1.30506e-05	1.25138e-05	2.09492e-05
186	FLJ39739	217136_at																																	FLJ39739	217136_at	3.97276e-05	1.97301e-05	3.42991e-05	2.71836e-05	2.73957e-05	1.43658e-05	1.73027e-05	3.17975e-05	2.52218e-05	4.31141e-05	6.81342e-05	1.26025e-05	4.0959e-05
187	TNKS	217121_at																																	TNKS	217121_at	1.11015e-05	5.7068e-05	7.63408e-05	6.83241e-05	0.000103827	9.44491e-05	2.33424e-05	5.09545e-05	2.55462e-05	7.4393e-05	8.06763e-05	2.68913e-05	0.000144202
188	PLXNB2	211472_at																																	PLXNB2	211472_at	7.75522e-05	1.54068e-05	5.141e-05	3.83005e-05	1.1512e-05	0.00012826	6.17838e-05	7.40371e-05	2.91956e-05	9.84016e-05	0.000110167	8.02302e-05	7.95694e-05
189	AW851559	216056_at																																	AW851559	216056_at	3.84589e-05	4.55915e-06	6.34883e-06	1.04677e-05	5.46457e-05	7.39719e-05	0.000115079	9.2095e-05	5.41741e-05	4.57348e-05	0.000149658	4.69489e-05	9.80761e-05
190	NENF	218406_x_at																																	NENF	218406_x_at	8.76228e-05	7.50688e-05	7.09984e-05	6.15891e-05	7.58482e-05	0.000146039	0.00013932	0.000124442	5.9851e-05	0.000220558	4.2033e-05	0.00011786	0.000189294
191	TRIM26	202702_at																																	TRIM26	202702_at	0.000340024	0.00030114	0.000343688	0.000283521	0.000314249	0.000402083	0.000449545	0.000365318	0.000502732	0.000448387	0.000368128	0.000465318	0.000536413
192	SMAD3	205398_s_at																																	SMAD3	205398_s_at	2.12515e-05	2.08306e-05	2.74083e-05	1.76896e-05	1.81424e-05	3.77003e-05	2.50563e-05	3.4938e-05	0.000161468	3.22088e-05	2.93214e-05	4.35764e-05	3.72952e-05
193	ULBP2	221291_at																																	ULBP2	221291_at	1.62558e-05	1.4778e-05	1.37816e-05	5.84244e-06	1.03463e-05	2.14296e-05	1.51807e-05	1.83719e-05	1.93826e-05	1.83446e-05	2.27114e-05	2.20101e-05	3.06253e-05
194	BF691447	221484_at																																	BF691447	221484_at	0.00072953	0.000527054	0.000578827	0.000998733	0.000506675	0.00089806	0.000571317	0.00105803	0.000680582	0.000937098	0.000761934	0.000724823	0.000895368
195	DIABLO	219350_s_at																																	DIABLO	219350_s_at	0.00143503	0.00100946	0.00098701	0.000795465	0.000819904	0.00106108	0.000782459	0.000865913	0.00119005	0.00145464	0.000734477	0.00158046	0.00132929
196	ALPP	211619_s_at																																	ALPP	211619_s_at	4.28202e-05	4.95219e-06	7.97474e-06	3.48924e-06	1.87981e-05	2.77792e-05	3.67275e-06	2.00992e-05	1.41112e-05	1.15816e-05	5.59311e-06	7.01127e-06	1.39035e-05
197	ING2	205981_s_at																																	ING2	205981_s_at	0.000325751	0.000210743	0.000172967	0.000271187	0.000156942	0.000222154	0.000194003	0.000188822	0.000219129	0.000322426	0.000231775	0.000185577	0.000358485
198	RRAD	204803_s_at																																	RRAD	204803_s_at	2.74367e-05	1.04546e-05	7.58762e-06	4.97419e-05	6.63035e-06	3.13508e-05	4.16245e-06	5.25248e-05	2.35998e-05	2.13034e-05	5.93208e-06	4.61501e-06	2.23584e-05
199	MRPS12	210008_s_at																																	MRPS12	210008_s_at	8.89709e-05	2.47609e-05	2.95762e-05	7.60329e-05	6.76878e-05	3.37318e-05	1.24873e-05	9.82189e-05	1.08673e-05	6.0867e-06	9.49133e-06	1.01175e-05	0.000152469
200	ITGB1	216178_x_at																																	ITGB1	216178_x_at	3.40183e-05	5.188e-06	4.3745e-05	3.14031e-05	4.0365e-05	1.60325e-05	4.1298e-05	3.06983e-05	3.67378e-05	5.91762e-06	3.10163e-05	9.14128e-06	7.88179e-05
201	HIST1H2AE	214469_at																																	HIST1H2AE	214469_at	1.11015e-05	2.67261e-06	7.66505e-06	3.08351e-05	1.17306e-05	9.52428e-06	3.4279e-06	9.97107e-06	2.42486e-05	4.7341e-06	1.11015e-05	2.75126e-06	3.41951e-05
202	POLDIP3	210583_at																																	POLDIP3	210583_at	3.48905e-05	2.60972e-05	5.69846e-05	1.11169e-05	1.69766e-05	0.000255171	5.68868e-05	9.5157e-05	0.000100319	3.82109e-05	4.10161e-05	1.55313e-05	8.87758e-05
203	WWP2	210200_at																																	WWP2	210200_at	0.000136945	0.000224578	0.000204246	0.000183225	0.000136177	0.000212868	0.000134178	0.000192355	0.000195773	0.000192407	0.000203386	0.000184068	0.000281452
204	AL110223	216534_at																																	AL110223	216534_at	1.35597e-05	3.22285e-05	2.45436e-05	1.25775e-05	1.38436e-05	2.76204e-05	1.38748e-05	3.62727e-05	3.97385e-05	2.28251e-05	2.05928e-05	1.81938e-05	7.00812e-05
205	TPD52	201691_s_at																																	TPD52	201691_s_at	0.000194753	0.000257828	0.00021888	0.000205784	0.000102151	0.000138578	0.000179393	0.000274401	0.00020737	0.000205426	0.000165929	0.000232082	0.000428379
206	CD72	215925_s_at																																	CD72	215925_s_at	3.60007e-05	1.13193e-05	4.97841e-05	1.59044e-05	7.6504e-06	7.54006e-06	4.81538e-06	7.27809e-05	1.75985e-05	2.64602e-05	2.00843e-05	2.76013e-05	4.72532e-05
207	CASP5	207500_at																																	CASP5	207500_at	2.18859e-05	1.38347e-05	3.56154e-05	1.21718e-05	1.30421e-05	2.46044e-05	6.8558e-06	9.40578e-05	9.97516e-06	3.80419e-05	7.26256e-05	1.05613e-05	6.14385e-05
208	NUBP1	203978_at																																	NUBP1	203978_at	0.000224648	0.000200603	0.000114666	0.000175922	0.000147033	0.000219217	0.000257174	0.000183326	0.000111998	0.00034542	0.000315078	0.000215574	0.000381783
209	PIGO	209998_at																																	PIGO	209998_at	0.000139959	0.000186061	0.000182877	0.000225421	0.000175595	0.000181993	0.00012724	0.000204682	0.000165766	0.000276522	0.000201945	0.000272996	0.000264824
210	CSE1L	210765_at																																	CSE1L	210765_at	1.03879e-05	3.40364e-05	2.91891e-05	1.89879e-05	3.48275e-05	2.70648e-05	1.91799e-05	8.79338e-06	2.60327e-05	8.45375e-05	2.46605e-05	4.05589e-05	5.22321e-05
211	ICAM1	202637_s_at																																	ICAM1	202637_s_at	0.000376263	0.00023519	0.000349263	0.000282953	0.000222955	0.000285967	0.000277252	0.000364847	0.000373055	0.000451853	0.000662783	0.000329175	0.000479389
212	CCL20	205476_at																																	CCL20	205476_at	1.32425e-05	7.23176e-06	5.49715e-06	4.94985e-06	7.14037e-06	1.00799e-05	7.26388e-06	7.53718e-06	8.19099e-06	1.2427e-05	3.16095e-05	8.16502e-06	1.29641e-05
213	NRIP2	215104_at																																	NRIP2	215104_at	2.13308e-05	6.09197e-05	6.67401e-05	5.39614e-05	0.000122989	0.00011945	8.65953e-05	7.67066e-05	0.000149546	6.31495e-05	0.000137624	0.000164188	0.000145705
214	PIK3R4	216752_at																																	PIK3R4	216752_at	1.98242e-06	5.65964e-06	2.55502e-06	1.86634e-06	4.37166e-06	2.85728e-05	6.03963e-06	4.31818e-06	2.15723e-05	1.77529e-06	3.22027e-05	2.92876e-05	8.45484e-06
215	AF202635	211435_at																																	AF202635	211435_at	5.48733e-05	1.4778e-05	7.18501e-05	6.36177e-05	6.67406e-05	0.000146674	4.85619e-05	2.28471e-05	8.96143e-05	2.62912e-05	0.000136268	0.000117594	9.45063e-05
216	NCAPD2	201774_s_at																																	NCAPD2	201774_s_at	9.17463e-05	8.85891e-05	5.55909e-05	0.000162128	9.42092e-05	0.000166913	0.000107408	0.000115099	0.000137868	7.49847e-05	0.000166353	0.000220101	0.000179806
217	NUP214	202155_s_at																																	NUP214	202155_s_at	0.000229723	0.000244779	0.000194259	0.000317115	0.000289112	0.000372479	0.000294963	0.000307533	0.00032618	0.000271534	0.000313722	0.000535874	0.000510578
218	CTDSPL	201905_s_at																																	CTDSPL	201905_s_at	1.63351e-05	1.74506e-05	1.71883e-05	1.54987e-05	2.48456e-05	3.19857e-05	2.04042e-05	1.32686e-05	2.66815e-05	1.95282e-05	2.42368e-05	5.36052e-05	7.81603e-05
219	RIPK5	211514_at																																	RIPK5	211514_at	2.18859e-05	1.91013e-05	6.15526e-05	8.19565e-06	3.3516e-06	3.91289e-05	8.08005e-06	1.70372e-05	8.02879e-06	1.10744e-05	3.9406e-05	2.25426e-05	6.16264e-05
220	CASP9	210775_x_at																																	CASP9	210775_x_at	0.000363179	0.000429425	0.00036227	0.000305673	0.000317237	0.000415814	0.000412001	0.000508681	0.000427797	0.000482709	0.000503719	0.000530372	0.000499869
221	TRPM3	216489_at																																	TRPM3	216489_at	8.81779e-05	6.90948e-05	8.56317e-05	6.63766e-05	8.16043e-05	9.75445e-05	4.6848e-05	7.82768e-05	8.52349e-05	0.00012613	0.000131438	8.75965e-05	0.000155569
222	RGN	210751_s_at																																	RGN	210751_s_at	0.000377056	0.000328023	0.000260534	0.000332451	0.000337783	0.000321524	0.00026705	0.000348359	0.000387734	0.000536475	0.00036406	0.000575279	0.000611285
223	AW408767	217608_at																																	AW408767	217608_at	5.25737e-05	5.59676e-05	6.65852e-05	7.00282e-05	5.7633e-05	3.37318e-05	4.60318e-05	7.99256e-05	4.49288e-05	8.03106e-05	2.70333e-05	6.39889e-05	9.20638e-05
224	UBE3B	213822_s_at																																	UBE3B	213822_s_at	0.000157959	0.000173405	0.000160269	0.000181197	0.000293411	0.000183819	0.000143237	0.000278797	0.000133164	0.000142699	0.000181776	0.000358995	0.000273937
225	KRT19P2	217350_at																																	KRT19P2	217350_at	3.88554e-06	4.06394e-05	1.33945e-05	1.02243e-05	8.23329e-06	8.41312e-06	6.03963e-06	3.34463e-05	1.56521e-05	1.12435e-05	7.62696e-06	1.09163e-05	1.48429e-05
226	GNRHR2	213852_at																																	GNRHR2	213852_at	0.0012199	0.00134189	0.00131374	0.000954184	0.00131434	0.00138856	0.00126596	0.00142712	0.00156286	0.00161374	0.00113735	0.00146234	0.00183855
227	AL520908	217833_at																																	AL520908	217833_at	0.000756411	0.000810586	0.000741419	0.000855918	0.000729775	0.000889171	0.000529284	0.000915061	0.000867272	0.00119468	0.00065397	0.000776298	0.00136968
228	PRDM12	220894_x_at																																	PRDM12	220894_x_at	8.96053e-06	1.04546e-05	7.35535e-06	1.26586e-05	8.45187e-06	1.40483e-05	8.48813e-06	1.10702e-05	1.20837e-05	2.14725e-05	1.19489e-05	1.278e-05	2.02916e-05
229	U82303	216702_x_at																																	U82303	216702_x_at	1.49871e-05	5.58103e-05	0.000109866	0.000145493	7.54111e-05	0.000251997	0.000101123	6.75206e-05	0.000138841	0.000191393	3.22027e-05	0.000184689	0.000231663
230	LOC646934	215572_at																																	LOC646934	215572_at	4.8371e-06	6.3671e-06	7.12307e-06	1.94748e-05	6.63035e-06	1.88105e-05	6.8558e-06	1.05992e-05	2.33565e-05	3.21242e-05	5.16939e-06	1.01175e-05	1.53127e-05
231	ATP11A	215842_s_at																																	ATP11A	215842_s_at	1.88726e-05	1.21053e-05	1.50204e-05	5.06345e-05	1.05648e-05	5.46853e-05	1.02837e-05	9.42933e-05	9.76431e-05	6.79681e-05	1.20337e-05	4.09139e-05	4.48106e-05
232	USP19	214674_at																																	USP19	214674_at	9.29357e-05	9.94367e-05	0.000117144	9.4534e-05	7.21323e-05	0.000214376	8.56159e-05	0.000152471	0.000187987	0.000159691	0.000110676	0.000157354	0.00023326
233	RAB14	200928_s_at																																	RAB14	200928_s_at	7.71557e-05	0.000112721	0.000127828	0.000130075	9.53021e-05	0.000193025	0.00010855	0.000172178	0.000175011	0.000127821	0.000146014	0.00015123	0.000179337
234	PLEKHO2	204436_at																																	PLEKHO2	204436_at	0.000331064	0.00039421	0.000472755	0.000400451	0.000261207	0.000821152	0.000473377	0.000552491	0.000764276	0.000443399	0.000754137	0.000754288	0.000858824
235	LOC441150	215492_x_at																																	LOC441150	215492_x_at	8.60369e-05	0.000268283	0.000369006	0.000327177	0.000180039	0.000866154	0.000359113	0.00037631	0.000412793	0.000237466	0.000540328	0.000525313	0.000477135
236	SFTPC	38691_s_at																																	SFTPC	38691_s_at	0.000206568	0.000245408	0.000232506	0.000289769	0.000219457	0.000562726	0.000425468	0.00050083	0.000442476	0.00038659	0.000445245	0.000697222	0.000509263
237	BC000265	209435_s_at																																	BC000265	209435_s_at	0.00140672	0.00117052	0.00104036	0.00143464	0.00126363	0.00197272	0.00158981	0.00154764	0.00192067	0.00158009	0.00163259	0.00240424	0.00185959
238	PPP2R3A	207749_s_at																																	PPP2R3A	207749_s_at	0.00024019	0.000235583	0.000248069	0.000272079	0.000224266	0.000371447	0.0004604	0.000317661	0.000298687	0.00034728	0.00028296	0.000594715	0.00037624
239	AVPR1A	206250_x_at																																	AVPR1A	206250_x_at	9.35701e-06	1.32844e-05	8.59414e-06	1.1766e-05	5.24599e-06	1.57151e-05	1.30587e-05	9.73553e-06	1.17593e-05	1.30188e-05	1.63556e-05	7.86327e-05	2.16068e-05
240	EMR2	207610_s_at																																	EMR2	207610_s_at	4.34546e-05	5.21945e-05	3.62348e-05	3.60284e-05	3.52647e-05	6.94479e-05	9.12474e-05	4.41239e-05	7.78549e-06	0.000106095	9.64387e-05	4.03814e-05	0.000120247
241	KLHL24	221985_at																																	KLHL24	221985_at	0.000129492	0.00017254	0.000177148	0.000233211	0.000175595	0.000278347	0.00028223	0.000180814	0.000207938	0.000224616	0.00023347	0.000255423	0.000274688
242	HLX	214438_at																																	HLX	214438_at	6.95432e-05	8.83533e-05	7.09984e-05	7.92787e-05	9.42092e-05	0.000137785	0.000106428	5.62933e-05	0.000105591	0.000123002	0.000157793	8.75078e-05	0.000165433
243	TPP1	214195_at																																	TPP1	214195_at	2.38683e-05	2.0359e-05	1.3317e-05	1.40381e-05	2.50642e-05	3.66685e-05	7.00271e-05	1.87644e-05	5.09301e-05	4.61575e-05	2.72028e-05	4.10914e-05	5.42049e-05
244	IL24	206569_at																																	IL24	206569_at	5.07499e-06	5.188e-06	5.03261e-06	5.19328e-06	6.92179e-06	7.54006e-06	8.24328e-06	5.80991e-06	1.38679e-05	9.13005e-06	5.16939e-06	1.39338e-05	1.87885e-05
245	USP13	205356_at																																	USP13	205356_at	0.000441365	0.000383362	0.000273464	0.000465854	0.000263975	0.00033462	0.000340668	0.000447049	0.000407765	0.000498179	0.000443974	0.000515373	0.000622652
246	PDE3A	206388_at																																	PDE3A	206388_at	8.84951e-05	0.000114686	6.46496e-05	0.000106381	9.29706e-05	0.000145166	0.000113121	0.000143521	0.000112484	9.05396e-05	7.61849e-05	0.000106234	0.000156978
247	LGALS9	203236_s_at																																	LGALS9	203236_s_at	0.000179369	0.000164916	0.000148036	0.000125856	0.000154101	0.000200486	0.00019082	0.000221012	0.00023097	0.000161128	0.000196352	0.000237407	0.000208365
248	MVK	36907_at																																	MVK	36907_at	0.000899304	0.000934077	0.000808314	0.000847398	0.000804021	0.00104839	0.000941938	0.000959264	0.00104536	0.00100321	0.000936845	0.00123114	0.00119645
249	FAF1	218080_x_at																																	FAF1	218080_x_at	0.000304499	0.000492546	0.000363122	0.000436966	0.000377711	0.000714877	0.000401227	0.000353463	0.000312231	0.000341362	0.000353637	0.000640511	0.000506351
250	X87344	215536_at																																	X87344	215536_at	8.231e-05	5.21945e-05	5.31133e-05	9.20185e-05	5.86531e-05	7.45275e-05	8.07189e-05	4.71859e-05	2.44108e-05	5.38504e-05	2.31351e-05	9.37203e-05	0.000109537
251	PHF20L1	219606_at																																	PHF20L1	219606_at	5.09085e-05	4.26831e-05	4.09577e-05	4.77133e-05	8.32801e-05	9.76239e-05	6.40691e-05	5.96694e-05	3.12231e-05	5.62174e-05	1.44065e-05	7.01127e-05	7.42147e-05
252	GPRC5C	219327_s_at																																	GPRC5C	219327_s_at	8.94467e-05	0.000121289	0.00012837	7.51403e-05	0.000192644	0.000143023	3.49319e-05	0.000181992	0.000100644	0.000126806	1.47455e-05	0.000136675	0.000128232
253	KCNJ5	208397_x_at																																	KCNJ5	208397_x_at	2.0855e-05	3.31718e-05	6.19398e-06	2.58853e-05	7.63583e-05	8.49249e-06	2.2363e-05	2.95206e-05	3.57646e-05	1.14971e-05	9.32184e-06	3.81626e-05	0.000112731
254	WT1	206067_s_at																																	WT1	206067_s_at	2.93398e-06	6.20988e-06	5.652e-06	3.40809e-06	8.67045e-06	4.76214e-06	9.95723e-06	1.20909e-05	6.56901e-06	4.56502e-06	3.64399e-06	7.54377e-06	1.01458e-05
255	SLC22A6	216599_x_at																																	SLC22A6	216599_x_at	6.18514e-06	4.71637e-06	3.56154e-06	4.1384e-06	7.86898e-06	7.54006e-06	1.01205e-05	1.51529e-05	1.3138e-05	7.35476e-06	6.27106e-06	1.69513e-05	1.1461e-05
256	TMBIM1	217730_at																																	TMBIM1	217730_at	0.000220128	0.000323543	0.000229564	0.000309487	0.000344632	0.000315095	0.000426039	0.00041588	0.00043177	0.000317523	0.000610581	0.000578474	0.000620679
257	TRIP6	209129_at																																	TRIP6	209129_at	0.00021307	0.000235268	0.000122718	0.000236051	0.000234612	0.000317714	0.000257337	0.000260268	0.000396979	0.000253951	0.000316349	0.000336008	0.000509075
258	ATP2A3	213036_x_at																																	ATP2A3	213036_x_at	1.22117e-05	1.61929e-05	1.56398e-05	1.07923e-05	1.53008e-05	2.42076e-05	1.51807e-05	1.63306e-05	1.49222e-05	3.6013e-05	3.51688e-05	2.52051e-05	2.73373e-05
259	SCYL2	221220_s_at																																	SCYL2	221220_s_at	8.81779e-05	7.60907e-05	7.04565e-05	8.76366e-05	8.48101e-05	0.000151674	6.92925e-05	6.40661e-05	7.35567e-05	0.000179304	0.000123303	0.000123629	0.000188825
260	RNASEH2A	203022_at																																	RNASEH2A	203022_at	0.000158356	0.000195965	0.000160889	0.000151579	0.00021443	0.000179453	0.000182985	0.000175946	0.00019188	0.000241016	0.000300079	0.000298023	0.000328236
261	SLC12A2	204404_at																																	SLC12A2	204404_at	0.000208788	0.000271034	0.000201459	0.000262098	0.00022514	0.000316127	0.000273824	0.000172099	0.000221157	0.000660069	0.000593124	0.000418369	0.000418139
262	DHFR	202534_x_at																																	DHFR	202534_x_at	0.000505041	0.000357815	0.000242417	0.000402236	0.000390098	0.000384702	0.00042359	0.00044752	0.000428445	0.000515087	0.000446516	0.00073716	0.000678266
263	TSPAN8	203824_at																																	TSPAN8	203824_at	0.000128302	0.000151081	8.05217e-05	0.000113116	1.39164e-05	0.000164929	0.000249665	8.17313e-05	0.00014687	0.000195958	0.000173132	0.000396891	0.000296295
264	DHFR	202532_s_at																																	DHFR	202532_s_at	0.000170409	0.000168296	0.000135338	0.000127479	0.000265505	0.000136753	0.000257582	0.000184818	0.000178255	0.000290893	0.000299655	0.000309472	0.000386292
265	DUSP10	221563_at																																	DUSP10	221563_at	0.000151615	0.000195022	0.00022097	0.000211951	0.000161606	0.00023779	0.000247707	0.000228942	0.000323828	0.000302391	0.000240165	0.000614951	0.000494608
266	CLCNKB	205985_x_at																																	CLCNKB	205985_x_at	1.30047e-05	1.06118e-05	1.42461e-05	9.7374e-06	8.0147e-06	1.11117e-05	1.43645e-05	8.08677e-06	2.34376e-05	3.47449e-05	1.27116e-05	2.06788e-05	3.04374e-05
267	LRRFIP1	201862_s_at																																	LRRFIP1	201862_s_at	0.000212912	0.000185903	0.000265567	0.000227044	0.000212244	0.000199851	0.00018527	0.000196281	0.000220102	0.000344744	0.000386094	0.000283823	0.000379998
268	CFLAR	211862_x_at																																	CFLAR	211862_x_at	0.000105227	0.000222377	0.000155237	0.000239946	0.000140694	0.000216439	0.000195554	0.000207351	0.000163171	0.000244482	0.000265673	0.000316128	0.000290471
269	CNOT6	217970_s_at																																	CNOT6	217970_s_at	0.000165968	0.000186218	0.000128912	0.000210247	0.000164374	0.00021001	0.000252848	0.000164091	0.000226266	0.000246342	0.000257368	0.000304058	0.000208647
270	YES1	202933_s_at																																	YES1	202933_s_at	0.000305609	0.000309236	0.000357625	0.000457983	0.000402484	0.000809802	0.000526427	0.000471545	0.000460885	0.000642062	0.000551938	0.000675123	0.000640971
271	C3orf63	209285_s_at																																	C3orf63	209285_s_at	0.000497111	0.000438072	0.000502796	0.000741909	0.000690285	0.000795754	0.000798129	0.000935318	0.000752192	0.000782563	0.00082261	0.00119502	0.000722513
272	AV712577	201305_x_at																																	AV712577	201305_x_at	0.000420193	0.000268047	0.000367303	0.000399639	0.000545291	0.000469071	0.000926431	0.00054621	0.000556419	0.000680019	0.00057126	0.000937114	0.0011197
273	ZBTB10	219312_s_at																																	ZBTB10	219312_s_at	3.70316e-05	2.42893e-05	1.88916e-05	5.60712e-05	4.93997e-05	5.00819e-05	4.15429e-05	5.09545e-05	5.70936e-05	4.72564e-05	3.99992e-05	6.99352e-05	7.84421e-05
274	PTPN11	212610_at																																	PTPN11	212610_at	0.00351617	0.00267056	0.00361999	0.00340639	0.00311328	0.00328183	0.00383264	0.00357553	0.00262193	0.00334109	0.00348688	0.00398196	0.00475425
275	STAG1	202293_at																																	STAG1	202293_at	0.000137104	0.000104939	5.62878e-05	0.000222743	0.000141642	0.000154611	0.000127893	7.23884e-05	0.00015352	0.000158761	0.000186522	0.000214332	0.000185819
276	CD68	203507_at																																	CD68	203507_at	6.14549e-05	5.67536e-05	6.03913e-05	8.70686e-05	7.0748e-05	2.20646e-05	4.96229e-05	5.81776e-05	0.000110457	7.60837e-05	9.95742e-05	7.7834e-05	0.000124662
277	TSPO	202096_s_at																																	TSPO	202096_s_at	0.000395691	0.000333604	0.00030064	0.000393635	0.000325543	0.000307793	0.000503493	0.000276128	0.000451559	0.000536137	0.000765578	0.000668201	0.00061354
[truncated: 1,096 more rows]
[truncated: 33 more columns]

## Sheet: Probe ID
Gene Symbol	Probe ID	MA Position
ZFP36L2	201367_s_at	1
ZFP36L2	201368_at	2
AL049435	213817_at	3
KRCC1	218303_x_at	4
NUP160	212709_at	5
BRD1	204520_x_at	6
[truncated: 1,366 more rows]
