# Supplementary material for: Uncovering Molecular Biomarkers That Correlate Cognitive Decline with the Changes of Hippocampus' Gene Expression Profiles in Alzheimer's Disease
Source: PLoS One. 2010 Apr 13;5(4):e10153. doi: 10.1371/journal.pone.0010153 (PMC2854141; doi:10.1371/journal.pone.0010153)
Supplement: File S3 — Supplementary Data 2. (1.26 MB XLS) [file pone.0010153.s003.xls]

## Sheet: transfac
Transfac information from GATHER, using the 1372 probes as input.
#	Annotation	Total Genes With Ann	Your Genes (With Ann)	Your Genes (No Ann)	Genome (With Ann)	Genome (No Ann)	ln(Bayes factor)	neg ln(p value)	FE: neg ln(p value)	FE: neg ln(FDR)	Genes
1	V$KROX_Q6	719	719	457	8950	7194	3.99	7.86	9.48	3.67	13CDNA73 AANAT ABAT ABLIM3 ACACA ACCN1 ACO2 ACTN1 ACTR8 ADAM22 ADAM30 ADCY2 ADD3 ADK ADORA2B AGXT AKAP12 AKR1B1 ALDH1A2 ALDH3A2 ALDOC AMFR ANK1 ANKHD1 ANKRD25 ANP32B AP2B1 AP3S1 APLP2 ARF3 ARF5 ARFRP2 ARG2 ARHGAP19 ARHGEF2 ARNT2 ARSD ASPH ATF5 ATP11A ATP2A3 ATP5H ATP6V0E ATP8A2 ATR ATRN B4GALT5 B4GALT6 BAHD1 BAI2 BAI3 BBS4 BCL11A BCL11B BCL2 BGR BHLHB2 BICD2 BTG3 BZRP C11orf9 C14orf1 C18orf1 C1QD…
2	V$MAZ_Q6	1003	1003	173	13091	3053	3.12	6.89	8.83	3.67	13CDNA73 AANAT ABAT ABLIM3 ACACA ACCN1 ACO2 ACSL6 ACTL7B ACTN1 ACTR8 ADAM18 ADAM22 ADAMTS6 ADARB2 ADCY2 ADD3 ADK ADORA2B AGTR1 AKAP12 AKR1B1 ALDH1A2 ALDH3A2 ALDH8A1 ALDOB ALDOC ALMS1 ALPP AMFR ANK1 ANKHD1 ANKRD25 ANP32B AP3S1 APBB3 APLP2 ARF3 ARF5 ARF6 ARG2 ARGBP2 ARHGAP19 ARHGEF2 ARMCX2 ARNT2 ARSD ASPH ASTN ATF5 ATP11A ATP2A3 ATP2B2 ATP2B4 ATP5C1 ATP5E ATP5H ATP6V1D ATP8A2 ATR ATRN B4GALT6 BAHD1…
3	V$E2F1_Q6_01	656	656	520	8175	7969	2.53	6.3	7.93	3.16	ABCE1 ACACA ACCN1 ACO2 ACTN1 ADAMTS6 ADARB2 ADCY2 ADD3 ADK ADORA2B AGTR1 AGXT AKAP12 AKR1B1 ALDH1A2 ALDH3A2 ALG8 ALMS1 ALPP AMFR ANKHD1 ANKRD25 ANP32B AP2B1 ARF3 ARF5 ARF6 ARFRP2 ARG2 ARGBP2 ARHGAP19 ARHGEF2 ARNT2 ASPH ASTN ATF5 ATP2A3 ATP2B2 ATP2B4 ATP5C1 ATP5E ATP6V0E ATP6V1D ATP8A2 ATR ATRN B4GALT5 B4GALT6 BAI2 BBS4 BHLHB2 BICD2 BIRC2 BMX BTG3 BTN2A2 BZRP C10orf76 C11orf9 C14orf1 C17orf25 C18o…
4	V$NFY_Q6_01	539	539	637	6654	9490	1.48	5.13	6.81	2.33	ABAT ACACA ACCN1 ACO2 ACTN1 ACTR8 ACYP2 ADAMDEC1 ADARB2 ADH1A ADK ADORA2B AGTR1 AGXT AKAP12 AKR1B1 AKR1C4 ALDH3A2 ALDH8A1 ALDOB ALMS1 ALPP ANKHD1 AP2B1 AP3S1 APBB3 APOH ARF3 ARFRP2 ARG2 ARGBP2 ARHGAP19 ASPH ASTN ATP2B1 ATP5E ATP5H AVPR1A BAHD1 BAI3 BCAP29 BCL11A BICD2 BPESC1 BPI BTG3 BTN2A2 C14orf1 C16orf33 C17orf25 C18orf1 C21orf2 C21orf62 C22orf3 C3orf14 C5orf4 C6orf109 C6orf162 C6orf32 C6orf62…
5	V$E2F1_Q3_01	603	603	573	7554	8590	1.14	4.72	6.42	2.17	ABCE1 ABLIM3 ACACA ACAD8 ACCN1 ACO2 ADAM22 ADARB2 ADCY2 ADD3 ADK ADORA2B AFM AKAP12 AKR1B1 ALDH1A2 AMFR ANK1 ANKHD1 ANP32B AP3S2 APLP2 ARF3 ARF5 ARF6 ARG2 ARNT2 ARSD ASPH ATF5 ATP11A ATP2A3 ATP5C1 ATP5E ATP6V0E ATP6V1D ATP8A2 B4GALT6 BAHD1 BAI2 BCAP29 BCL11B BICD2 BIRC2 BMP4 BRAP BTG3 BZRAP1 C16orf33 C17orf25 C18orf1 C1QDC1 C20orf111 C20orf67 C21orf2 C22orf3 C3orf14 C4orf8 C4orf9 C6orf106 C6orf10…
6	V$MAZR_01: MAZ related factor	610	610	566	7704	8440	0.5	3.95	5.72	1.78	AANAT ABAT ABLIM3 ACACA ACO2 ACSL6 ACTN1 ACTR8 ADAM18 ADAMTS6 ADD3 ADK AGTR1 AGXT AKAP12 ALMS1 ALPP AMFR ANKRD25 ANP32B AP3S1 APLP2 ARF5 ARF6 ARFRP2 ARHGEF2 ARNT2 ARSD ASPH ATP2A3 ATP2B2 ATP2B4 ATP5E ATP5H ATP6V1D ATP8A2 ATR ATRN B3GALT2 B4GALT6 BAHD1 BCAP29 BCL11A BCL11B BCL2 BHLHB2 BMP4 BMX BRD1 BTG3 BZRAP1 BZRP C14orf1 C18orf1 C1QDC1 C1orf21 C1orf41 C20orf111 C20orf18 C20orf19 C20orf67 C21orf2…
7	V$E2F1_Q6: E2F-1	862	862	314	11225	4919	0.37	3.84	5.69	1.78	ABAT ABCE1 ABLIM3 ACACA ACAD8 ACCN1 ACO2 ACSL6 ACTN1 ACYP2 ADAM22 ADAMTS6 ADARB2 ADCY2 ADD3 ADK ADORA2B AFM AKAP12 AKAP4 AKR1B1 ALDH1A2 ALDH3A2 ALG8 ALMS1 ALPP AMFR ANK1 ANKHD1 ANKRD25 ANP32B AP2B1 AP3S1 AP3S2 APBB3 APLP2 ARF3 ARF5 ARF6 ARFRP2 ARG2 ARGBP2 ARHGAP19 ARHGEF2 ARNT2 ASPH ASTN ATF5 ATP11A ATP2A3 ATP2B1 ATP2B2 ATP2B4 ATP5C1 ATP5E ATP5H ATP6V0E ATP6V1D ATP8A2 ATR ATRN B4GALT5 B4GALT6 BAH…
8	V$NFY_01: nuclear factor Y (Y-box binding factor)	296	296	880	3532	12612	-0.08	0	5.25	1.47	ABAT ACACA ACO2 ADARB2 ADH1A ADK ADORA2B AKAP12 AKR1B1 AKR1C4 ALDH8A1 ALDOB APLP2 APOH ARFRP2 ARGBP2 ARHGAP19 ATP2B1 ATP5E BAHD1 BAI3 BICD2 BTG3 C14orf1 C16orf33 C21orf2 C6orf162 C6orf32 C7orf28A CALM3 CAMKK2 CAP350 CASP8AP2 CAST CDC14B CDC2L6 CDH1 CDH10 CDH11 CDKN2D CGI-12 CHAF1A CHKB CLTA CMKLR1 CNAP1 CNOT1 CNOT6 COG2 COLQ CR1 CRIM1 CSE1L CSF2 CSF2RA CYP19A1 DDC DHRS9 DIO2 DKFZP434A0131 DLX2 DM…
9	V$E2F1DP1_01: E2F-1:DP-1 heterodimer	525	525	651	6641	9503	-0.53	0	4.59	1.03	ACACA ACCN1 ACO2 ACTN1 ADAMTS6 ADARB2 ADCY2 ADK ADORA2B AKAP12 AKAP4 AKR1B1 ALDH3A2 ALG8 ALMS1 ALPP AMFR ANK1 ANKHD1 ANKRD25 ANP32B ARF3 ARF5 ARF6 ARFRP2 ARHGAP19 ARHGEF2 ARNT2 ASPH ASTN ATF5 ATP11A ATP2A3 ATP2B4 ATP5C1 ATP5E ATP6V1D ATR ATRN B4GALT6 BAI2 BBS4 BICD2 BIRC2 BMX BRAP BTG3 BTN2A2 BZRP C10orf76 C11orf9 C14orf1 C16orf33 C17orf25 C18orf1 C1QDC1 C1orf21 C1orf41 C20orf111 C20orf18 C20orf6…
10	V$NFY_Q6: nuclear factor Y (Y-box binding factor)	425	425	751	5307	10837	-0.73	0	4.42	0.95	ABAT ACACA ACCN1 ACO2 ACTR8 ACYP2 ADARB2 ADH1A ADK AGTR1 AGXT AKAP12 AKR1B1 AKR1C4 ALDH8A1 ALDOB ALG8 ALMS1 ANKHD1 AP3S1 APLP2 APOH ARFRP2 ARGBP2 ARHGAP19 ASTN ATP2B1 ATP5E AVPR1A BAHD1 BAI3 BCL11A BICD2 BMX BPESC1 BPI BTG3 BTN2A2 C14orf1 C16orf33 C20orf18 C20orf67 C21orf62 C22orf3 C5orf4 C6orf106 C6orf162 C6orf32 C6orf62 C7orf28A C9orf36 CA1 CACNG3 CALM1 CALM3 CAMKK2 CASP8AP2 CAST CD200 CD40 CD7…
11	V$HEB_Q6	327	327	849	4983	11161	-0.94	0	0.01	0.01	ABCE1 ABLIM3 ACACA ADAMTS6 ADK ADORA2B AKAP4 ALMS1 ALPP ANK1 ANKHD1 AP3S1 ARFRP2 ASTN ATF5 ATP2A3 ATP2B2 ATP2B4 ATP6V1D ATP8A2 B4GALT5 B4GALT6 BATF BPESC1 BRD1 C11orf9 C18orf1 C1QDC1 C1orf21 C20orf18 C20orf67 C21orf62 C4orf9 C5orf4 CABP1 CADPS2 CALM3 CAPZA1 CASP4 CCDC6 CCIN CDC14B CDC27 CDC42EP4 CDH11 CDIPT CENPE CESK1 CLDN10 CLIPR-59 CNNM1 COAS2 COL21A1 COMT COX4I1 CRYM CSE1L CSF1 CSF2 CSF2RA CS…
12	V$NKX25_01: homeo domain factor Nkx-2.5/Csx, tinman homolog	613	613	563	7900	8244	-1.04	0	3.98	0.61	13CDNA73 AANAT ABCB1 ABCE1 ABLIM3 ACACA ACO2 ACSL6 ACTL7B ACTR8 ADAM22 ADAMTS6 ADD3 ADH1A AFM AGTR1 AKAP12 AKAP4 AKR1B1 AKR1C4 ALDH1A2 ALDH3A2 ALDOB ALDOC ALMS1 AMFR ANK1 AP2B1 AP3S2 APBB3 ARF3 ARF5 ARF6 ARFRP2 ARGBP2 ARHGAP19 ASPH ATF5 ATP11A ATP2B1 ATP2B4 ATP5E ATP6V0E ATP6V1D ATP8A2 ATRN AVPR1A B3GALT2 BAI2 BATF BBS7 BCAP29 BCL11A BCL11B BCL2 BGR BIRC2 BMX BPESC1 BTG3 BZRP C16orf33 C18orf1 C1S…
13	V$HNF4_01: hepatic nuclear factor 4	1135	1135	41	15329	815	-1.14	0	4.83	1.16	13CDNA73 AANAT ABAT ABCB1 ABCE1 ABLIM3 ACACA ACAD8 ACCN1 ACO2 ACSL6 ACTL7B ACTN1 ACTR8 ACYP2 ADAM18 ADAM22 ADAM30 ADAMDEC1 ADAMTS6 ADARB2 ADCY2 ADD3 ADH1A ADK ADORA2B AFM AGTR1 AGXT AKAP12 AKAP4 AKR1B1 AKR1C4 ALDH1A2 ALDH3A2 ALDH8A1 ALDOB ALDOC ALG8 ALMS1 ALPP AMFR ANK1 ANKHD1 ANKRD25 ANP32B AP2B1 AP3S1 AP3S2 APBB3 APLP2 APOH ARF3 ARF5 ARF6 ARFRP2 ARG2 ARGBP2 ARHGAP19 ARHGEF2 ARMCX2 ARNT2 ARSD AS…
14	V$CAAT_01: cellular and viral CCAAT box	685	685	491	8931	7213	-1.39	0	3.6	0.5	AANAT ABAT ACACA ACAD8 ACCN1 ACO2 ACSL6 ACTL7B ACTN1 ACTR8 ACYP2 ADAMDEC1 ADAMTS6 ADARB2 ADH1A ADK ADORA2B AFM AGTR1 AGXT AKAP12 AKR1B1 AKR1C4 ALDH1A2 ALDH3A2 ALDH8A1 ALDOB ALDOC ALPP AMFR ANK1 ANKHD1 AP2B1 AP3S1 AP3S2 APBB3 APLP2 APOH ARF3 ARF5 ARFRP2 ARGBP2 ARHGAP19 ASPH ASTN ATP2B1 ATP2B4 ATP5E ATP5H ATP6V0E ATR AVPR1A BAHD1 BAI3 BBS7 BCAP29 BCL11A BCL2 BGR BHLHB2 BICD2 BMX BPESC1 BPI BRAP BRD…
15	V$ELF1_Q6	581	581	595	7505	8639	-1.41	0	3.56	0.5	13CDNA73 ABAT ACACA ACO2 ACSL6 ACTL7B ACTN1 ADAM18 ADAM30 ADAMTS6 ADARB2 ADCY2 ADD3 ADH1A ADK ADORA2B AFM AKAP12 AKAP4 AKR1C4 ALDH1A2 ALDH8A1 ALDOB ALMS1 ALPP AMFR ANK1 ANKHD1 ANKRD25 ANP32B AP2B1 APLP2 ARF3 ARF5 ARGBP2 ARHGEF2 ARMCX2 ASTN ATF5 ATP11A ATP2A3 ATP2B1 ATP2B4 ATRN AVPR1A B3GALT2 B4GALT5 B4GALT6 BAHD1 BAI3 BCL11B BCL2 BHLHB2 BMP4 BPESC1 BPI BTN2A2 BZRP C10orf76 C14orf114 C16orf33 C18o…
16	V$COMP1_01: COMP1	684	684	492	8925	7219	-1.45	0	3.53	0.5	ABAT ABCB1 ACACA ACCN1 ACTN1 ACTR8 ACYP2 ADAMDEC1 ADAMTS6 ADARB2 ADD3 ADK AFM AGTR1 AGXT AKAP12 AKAP4 AKR1B1 AKR1C4 ALDH8A1 ALDOB ALMS1 AMFR ANK1 ANKHD1 ANKRD25 APBB3 ARFRP2 ARG2 ARGBP2 ARHGAP19 ARHGEF2 ARSD ASPH ASTN ATP2B1 ATP2B4 ATP5C1 ATP5E ATP6V0E ATP8A2 ATR ATRN AVPR1A B4GALT5 BAHD1 BAI3 BATF BCAP29 BCL11A BCL2 BHLHB2 BICD2 BIRC2 BMP4 BMX BPI BRD1 BTG3 BTN2A2 BZRAP1 C14orf1 C14orf114 C18orf…
17	V$E2F_Q3_01	605	605	571	7858	8286	-1.6	0	3.34	0.5	ABCE1 ABLIM3 ACACA ACCN1 ACO2 ACSL6 ACTN1 ADAM22 ADAM30 ADARB2 ADCY2 ADD3 ADK ADORA2B AFM AKAP12 AKR1B1 ALDH1A2 ALG8 ALMS1 ALPP AMFR ANK1 ANKHD1 ANP32B AP2B1 AP3S2 APBB3 APLP2 ARF5 ARF6 ARFRP2 ARG2 ARGBP2 ARHGAP19 ARHGEF2 ARNT2 ATF5 ATP11A ATP2A3 ATP2B2 ATP2B4 ATP5C1 ATP6V0E ATP6V1D ATP8A2 ATRN B4GALT5 B4GALT6 BAHD1 BAI2 BBS4 BCAP29 BCL11A BHLHB2 BIRC2 BMX BPI BRAP BRD1 BTG3 C10orf76 C14orf1 C14o…
18	V$POU1F1_Q6	455	455	721	5819	10325	-1.66	0	3.3	0.5	13CDNA73 ABAT ABCB1 ABCE1 ACACA ACAD8 ACYP2 ADAM18 ADAM22 ADAM30 ADAMDEC1 ADAMTS6 ADD3 ADH1A AFM AGTR1 AGXT AKAP4 AKR1B1 AKR1C4 ALDH1A2 ALDH8A1 ALDOB ALPP AMFR AP2B1 APLP2 APOH ARGBP2 ARHGAP19 ARMCX2 ASPH ASTN ATP2B1 ATP2B4 ATP5C1 ATP5E ATP8A2 AVPR1A B3GALT2 B4GALT5 BAI3 BCL2 BGR BIRC2 BMX BPI BTG3 C14orf114 C1S C20orf18 C20orf67 C21orf62 C5orf4 C6orf210 C6orf32 C9orf36 CA1 CACNG3 CADPS2 CALM1 CA…
19	V$PAX6_Q2	53	53	1123	974	15170	-1.68	0	0.01	0.01	AKAP12 AKR1B1 ALG8 AP2B1 BGR C17orf25 C6orf210 CALM3 CDH1 CRYM CSF2 CSF2RA CSGlcA-T CTBP2 DKFZP434A0131 EFS FAF1 FLJ11767 FLJ12716 FLT3LG FZD5 GJB5 GRAP HLA-DQB2 ITM2A KIF17 MAPBPIP MKKS NOTCH2 NOTCH2NL PAX8 PBX1 PCP4 PCSK1 PPP1R12B PPP2R2B PRP19 PTPN11 RAB14 RAB35 RGS3 RNPS1 RRAD SEC63 SGK2 SLC33A1 SNAPC2 SPTB TEAD1 TIMM23 TNKS TNS ZA20D3
20	V$E2F_03	198	198	978	2378	13766	-1.72	0	3.54	0.5	ACACA ADARB2 ADORA2B AKAP12 AKR1B1 ALDH1A2 ALG8 AMFR ANKHD1 AP2B1 ARF6 ARHGEF2 ATP2A3 ATP2B2 ATP2B4 ATP5C1 ATP6V0E ATP8A2 B4GALT6 BIRC2 BMX BTG3 C10orf76 C1orf41 C20orf111 C3orf14 C4orf9 C6orf145 C7orf28A CA1 CALM3 CASP8AP2 CCL22 CD44 CDC14B CDC2L6 CDC34 CDH10 CHAF1A CMKLR1 CNOT1 COBLL1 COL21A1 COL4A1 COX4I1 COX7C CRIM1 CTAGE5 CTTN CUTL1 D2LIC DAPK3 DCLRE1A DDAH2 DHX9 DJ462O23.2 DLEC1 DOCK4 DRD4 …
21	V$AFP1_Q6	154	154	1022	2445	13699	-1.8	0	0.02	0.02	ACCN1 ADAM30 ADK AGTR1 ALDH1A2 ALDOB ALDOC AMFR ATP11A ATP5C1 ATP5E ATR B4GALT5 BBS4 BBS7 BCL2 BMP4 BMX BPESC1 C21orf62 C6orf109 C6orf145 CA1 CASP5 CCDC6 CD1B CDK7 CEPT1 CFHL2 CGA CHRNB3 CLDN10 CLEC7A CRYM CSF2RB CSNK1A1 D2LIC DDX18 DDX52 DHRS9 DHX9 DMD DNAI2 ENSA F9 FBXW7 FKBP3 FLJ10521 FLJ13197 FLJ13955 FLJ36754 FRG1 GABRA5 GJA5 GLRA3 GPM6A GRM5 GSTA3 HIST1H1C HPCA HS322B1A HTN3 IGF2 IL15 KCNAB…
22	V$ELK1_01: Elk-1	284	284	892	4282	11862	-1.81	0	0.03	0.02	AANAT ABAT ACACA ACCN1 ADAM22 ADK AGTR1 AKAP12 ALDH8A1 ANKHD1 AP3S2 APBB3 ARHGEF2 ARMCX2 ATP2B4 ATP6V1D B3GALT2 B4GALT6 BATF BCAP29 BICD2 BPESC1 BRAP BRD1 C10orf76 C14orf1 C16orf33 C18orf1 C20orf67 C21orf2 C7orf28A C9orf36 CALM1 CAMK1G CASP4 CAST CCL20 CCND3 CD40 CD68 CD72 CDC27 CDH10 CFHL2 CGI-30 CHD2 CHD3 CHRDL1 CLIC5 CLTA CNAP1 COL21A1 COL4A1 COMT CPT2 CRYZ CSE1L CSF2 CSNK1A1 CST1 CTAG1B CTTN …
23	V$SP3_Q3	922	922	254	12285	3859	-1.84	0	3.26	0.5	13CDNA73 AANAT ABAT ABCE1 ABLIM3 ACACA ACAD8 ACCN1 ACO2 ACSL6 ACTN1 ACTR8 ADAM18 ADAM22 ADAM30 ADAMTS6 ADARB2 ADCY2 ADD3 ADK ADORA2B AGTR1 AKAP12 AKR1B1 AKR1C4 ALDH1A2 ALDH3A2 ALDH8A1 ALDOC ALMS1 ALPP ANK1 ANKRD25 ANP32B AP2B1 AP3S1 APBB3 APOH ARF5 ARF6 ARFRP2 ARG2 ARHGAP19 ARHGEF2 ARNT2 ARSD ASTN ATF5 ATP11A ATP2A3 ATP2B2 ATP2B4 ATP5E ATP5H ATP6V0E ATP6V1D ATP8A2 ATRN B3GALT2 B4GALT5 B4GALT6 BAH…
24	V$VMAF_01: v-Maf	766	766	410	10112	6032	-1.85	0	3.08	0.5	AANAT ABCE1 ABLIM3 ACACA ACCN1 ACO2 ACSL6 ACTL7B ACYP2 ADAM30 ADAMDEC1 ADARB2 ADCY2 ADD3 ADH1A ADK ADORA2B AFM AGTR1 AGXT AKAP12 AKAP4 ALDH1A2 ALDH3A2 ALDH8A1 ALG8 ALMS1 ALPP ANK1 ANKHD1 ANKRD25 AP2B1 APLP2 ARF5 ARFRP2 ARG2 ARGBP2 ARHGAP19 ARMCX2 ARNT2 ARSD ASPH ATF5 ATP11A ATP2A3 ATP2B1 ATP2B2 ATP2B4 ATP6V0E ATR B3GALT2 B4GALT6 BAHD1 BAI2 BATF BBS7 BCAP29 BGR BICD2 BIRC2 BMP4 BMX BPESC1 BRAP BRD…
25	V$DEAF1_01	378	378	798	4803	11341	-1.88	0	3.09	0.5	ABAT ACACA ACAD8 ACO2 ACSL6 ACTN1 ACTR8 ADAM18 ADAM22 ADCY2 ADD3 ADK ADORA2B AKAP12 ALDH1A2 ALDH3A2 ALDOC ALG8 ALMS1 ANK1 ANKRD25 AP3S1 APBB3 ARHGAP19 ATF5 ATP11A ATP2A3 ATP5E ATR BHLHB2 BICD2 BIRC2 BMP4 BMX BPI C14orf1 C16orf33 C17orf25 C1QDC1 C20orf19 C20orf67 C22orf3 C3orf14 C4orf9 C6orf145 C7orf28A CA11 CADPS2 CAMKK2 CAPZA1 CASP9 CAST CD40 CD72 CDC14B CDC27 CDC34 CDH10 CDK5R1 CEPT1 CGI-12 CGI…
26	V$NFKB_Q6_01	867	867	309	11536	4608	-2	0	2.98	0.5	13CDNA73 AANAT ABAT ABCB1 ABLIM3 ACACA ACAD8 ACCN1 ACO2 ACSL6 ACTL7B ACTN1 ACTR8 ADAM18 ADAM30 ADAMTS6 ADARB2 ADCY2 ADK ADORA2B AFM AGTR1 AGXT AKAP12 AKAP4 AKR1B1 ALDH1A2 ALDH3A2 ALDOC ALMS1 ALPP ANK1 ANKHD1 ANKRD25 ANP32B AP2B1 AP3S1 APBB3 APLP2 ARFRP2 ARG2 ARGBP2 ARHGEF2 ARMCX2 ARNT2 ARSD ASPH ASTN ATF5 ATP11A ATP2A3 ATP2B2 ATP5E ATP8A2 ATR ATRN B3GALT2 B4GALT5 B4GALT6 BAI2 BATF BBS4 BBS7 BCAP2…
27	V$HFH3_01: HFH-3 (HNF3/fork head homolog 3)	455	455	721	5870	10274	-2.04	0	2.84	0.5	13CDNA73 ABAT ABCB1 ABLIM3 ACACA ACCN1 ADAM22 ADAM30 ADAMTS6 ADARB2 ADH1A ADK AFM AGTR1 AKAP12 AKR1C4 ALDH1A2 ALDH8A1 ALG8 ALPP ARF3 ARF6 ARHGAP19 ARMCX2 ARSD ATP11A ATP2B1 ATP2B4 ATR AVPR1A B3GALT2 BAI2 BAI3 BATF BBS4 BBS7 BCAP29 BCL11B BGR BIRC2 BMX BPI BRAP BRD1 BTG3 BZRAP1 BZRP C14orf1 C14orf114 C1S C20orf111 C20orf18 C21orf62 C5orf4 C6orf106 C9orf36 CA1 CABP1 CACNG3 CAMK1G CAMKK2 CASP4 CASP8…
28	V$NFKAPPAB65_01: NF-kappaB (p65)	100	100	1076	1127	15017	-2.05	0	3.48	0.5	13CDNA73 ALDH1A2 ANKRD25 APLP2 B4GALT6 C6orf62 CABP1 CAP350 CAPZA1 CCL20 CD40 CDIPT CEPT1 CGA CHD3 COBLL1 COPZ2 CPT2 CSF1 CSF2RB CUTL1 DAZAP2 DIABLO DKFZP434H132 DLG5 DOK4 DUSP10 DUSP6 E2F3 EHD1 FBN2 FCAR FCGR2C FETUB FLJ20323 FPGS GJA5 GPR125 HMGN4 HPCA ICAM1 IFIH1 IRF8 ITSN2 KIAA0992 LPHN1 LTF MAPBPIP MAPKAPK2 MARS MICAL-L2 MINPP1 MSX1 MT1F MYB MYCPBP NDUFV2 NFATC1 NUCKS OR2J2 PAK4 PARP1 PCSK2 …
29	V$CP2_01: CP2	835	835	341	11097	5047	-2.05	0	2.89	0.5	13CDNA73 AANAT ABLIM3 ACACA ACCN1 ACO2 ACSL6 ACTN1 ACTR8 ACYP2 ADAM18 ADAM22 ADAM30 ADARB2 ADCY2 ADD3 ADH1A ADORA2B AGTR1 AGXT AKAP12 AKAP4 AKR1B1 AKR1C4 ALDH1A2 ALDH8A1 ALDOB ALMS1 ALPP ANK1 ANKHD1 ANP32B AP2B1 AP3S1 APLP2 ARF3 ARF6 ARFRP2 ARG2 ARGBP2 ARHGEF2 ARMCX2 ARNT2 ARSD ASPH ATF5 ATP11A ATP2A3 ATP2B2 ATP5H ATP6V0E ATP6V1D ATP8A2 ATR AVPR1A B3GALT2 B4GALT5 B4GALT6 BAHD1 BAI2 BATF BBS7 BCAP…
30	V$IRF_Q6	324	324	852	4099	12045	-2.07	0	2.9	0.5	ABCB1 ACCN1 ACTN1 ADAM18 ADAM30 ADAMDEC1 ADAMTS6 ADH1A ADK AFM AGTR1 AKAP12 AKAP4 ALDOC ALG8 ANK1 ARHGEF2 ARSD ASPH ATF5 ATP2B4 ATP5C1 ATP5E ATP6V1D AVPR1A BAI3 BATF BCL11A BCL2 BIRC2 BMP4 BMX BTG3 BTN2A2 BZRP C10orf76 C14orf114 C18orf1 C1S C20orf18 C21orf2 C21orf62 C5orf4 C6orf145 C6orf62 CA11 CACNG3 CALM1 CALM3 CAMK1G CASP4 CAST CCDC6 CCL20 CD1B CD44 CD68 CDIPT CDK7 CDKN2D CENPE CFLAR CGA CHD2 …
31	V$NRF1_Q6	58	58	1118	1026	15118	-2.09	0	0.02	0.01	ALG8 ATP5C1 ATP6V1D ATRN BRAP C1orf41 C20orf67 C3orf14 C6orf106 CADPS2 CASK CHD3 CHKB CLIPR-59 CLN8 COX6A1 DHX9 DNCH1 EIF3S12 EIF5B FLJ13154 FXR2 GRIA2 GTSE1 LEREPO4 MCTP1 MKL2 MTHFD1 MYB N4BP1 NDUFA3 NEUROD1 NUBP1 OPA1 PDCD4 PIN4 PIP5K1A PPIA PSCD1 PSD3 QKI RAB14 RAB35 RENT1 RSU1 SAFB2 SAP30 SAV1 SFRS7 SGTA SLC19A1 SPATA5L1 SRD5A1 ST3GAL4 STAG1 TFDP1 TXNDC9 YWHAE
32	V$PPARG_03: PPAR (peroxisome proliferator-activated receptor gamma)	478	478	698	6195	9949	-2.11	0	2.73	0.48	ABAT ABCB1 ABCE1 ABLIM3 ACACA ACAD8 ACO2 ACSL6 ACTL7B ACTR8 ACYP2 ADAM22 ADAMDEC1 ADCY2 ADH1A ADK ADORA2B AFM AGTR1 AGXT AKAP12 AKR1B1 ALDH3A2 ALDH8A1 ALPP AMFR ANK1 ANP32B AP2B1 APOH ARF3 ARG2 ARHGEF2 ARMCX2 ASTN ATF5 ATP11A ATP2B1 ATP2B2 ATP6V1D ATR AVPR1A B4GALT5 BAHD1 BAI3 BATF BBS4 BBS7 BCL11A BMP4 BPESC1 BRAP C14orf1 C14orf114 C1S C1orf21 C20orf111 C20orf19 C21orf2 C4orf9 C6orf162 C7orf28A …
33	V$FOXO4_01: fork head box O4	678	678	498	9673	6471	-2.13	0	0.06	0.04	13CDNA73 ABAT ABCB1 ABCE1 ABLIM3 ACACA ACAD8 ACCN1 ACO2 ACSL6 ACYP2 ADAM18 ADAM22 ADAMDEC1 ADAMTS6 ADD3 ADH1A ADK AFM AGTR1 AGXT AKAP12 AKR1C4 ALDH1A2 ALDH8A1 ALDOB ALG8 ALMS1 AMFR AP2B1 APBB3 APOH ARF5 ARF6 ARFRP2 ARGBP2 ARMCX2 ARSD ASPH ASTN ATP2B1 ATP2B2 ATP2B4 ATP5E ATP8A2 ATR AVPR1A B3GALT2 BAI3 BATF BBS4 BBS7 BCAP29 BCL11B BCL2 BGR BIRC2 BMP4 BMX BPESC1 BPI BRAP BZRP C14orf1 C14orf114 C16or…
34	V$TEF_Q6	388	388	788	4973	11171	-2.14	0	2.77	0.49	13CDNA73 AANAT ABCB1 ABLIM3 ACACA ACAD8 ACCN1 ACTR8 ADAM18 ADARB2 ADD3 AKAP12 ALDH8A1 ALDOB ALG8 ANK1 AP3S2 APOH ARG2 ARGBP2 ARNT2 ASPH ATP2B1 ATP2B2 ATP5E ATP8A2 AVPR1A B3GALT2 BAI3 BATF BBS7 BCL11B BIRC2 BMX BPESC1 C10orf76 C14orf1 C14orf114 C17orf25 C1QDC1 C20orf19 C3orf14 C4orf8 C6orf32 C6orf62 C7orf28A CA1 CAMK1G CASP5 CASP8AP2 CAST CCDC6 CCL20 CDC27 CDC2L6 CDH10 CDKN2D CENPE CENTG1 CEPT1 CF…
35	V$FOXD3_01: fork head box D3	969	969	207	12982	3162	-2.14	0	2.97	0.5	13CDNA73 AANAT ABAT ABCB1 ABCE1 ABLIM3 ACACA ACAD8 ACCN1 ACYP2 ADAM18 ADAM22 ADAMDEC1 ADAMTS6 ADARB2 ADD3 ADH1A ADK AFM AGTR1 AGXT AKAP12 AKAP4 AKR1B1 AKR1C4 ALDH1A2 ALDH3A2 ALDH8A1 ALDOB ALG8 ALMS1 AMFR ANK1 ANKRD25 ANP32B AP2B1 AP3S1 AP3S2 APBB3 APLP2 APOH ARF3 ARF6 ARFRP2 ARG2 ARGBP2 ARHGAP19 ARMCX2 ARNT2 ARSD ASPH ASTN ATF5 ATP11A ATP2B1 ATP2B4 ATP5E ATP6V0E ATR AVPR1A B3GALT2 B4GALT5 BAI3 BA…
36	V$IRF7_01: interferon regulatory factor 7	662	662	514	8721	7423	-2.15	0	2.67	0.45	ABCB1 ABLIM3 ACACA ACCN1 ACTN1 ACTR8 ADAM18 ADAM30 ADAMDEC1 ADAMTS6 ADARB2 ADK AFM AGTR1 AKAP12 AKAP4 AKR1B1 AKR1C4 ALDH1A2 ALDH8A1 ALDOB ALDOC ALG8 ANK1 ANKHD1 ANKRD25 AP3S2 APOH ARF3 ARFRP2 ARGBP2 ARSD ASPH ATF5 ATP2A3 ATP2B4 ATP5C1 ATP5E ATR AVPR1A B3GALT2 BAI3 BCL2 BGR BIRC2 BMP4 BMX BPESC1 BPI BRAP BTG3 BTN2A2 C10orf76 C14orf114 C17orf25 C18orf1 C1S C1orf21 C20orf111 C20orf18 C20orf67 C21orf…
37	V$CHOP_01: heterodimers of CHOP and C/EBPalpha	422	422	754	5456	10688	-2.27	0	2.56	0.39	AANAT ABAT ABCE1 ACACA ACTN1 ACYP2 ADAM30 ADARB2 ADD3 ADH1A ADK AGTR1 AKAP12 AKAP4 AKR1B1 ALDH1A2 ALDH8A1 ALDOC ALG8 ANKHD1 ANKRD25 ANP32B AP2B1 AP3S1 APOH ARF3 ASPH ASTN ATP5C1 ATP5E ATP6V1D AVPR1A B4GALT5 BAI2 BAI3 BBS7 BGR BHLHB2 BIRC2 BMX BRAP BRD1 BZRAP1 C10orf76 C16orf33 C17orf25 C1S C5orf4 C6orf106 C6orf162 C6orf62 C7orf28A C9orf36 CA1 CABP1 CACNG3 CALM3 CASP4 CASP8AP2 CASP9 CAST CCDC6 CD1…
38	V$CDC5_01: cell division control protein 5	928	928	248	13039	3105	-2.3	0	0.06	0.04	13CDNA73 AANAT ABAT ABCB1 ABLIM3 ACACA ACCN1 ACO2 ACSL6 ACTL7B ACTN1 ACTR8 ACYP2 ADAM18 ADAM22 ADAM30 ADAMDEC1 ADAMTS6 ADARB2 ADD3 ADH1A ADK ADORA2B AFM AGTR1 AGXT AKAP12 AKAP4 AKR1B1 AKR1C4 ALDH1A2 ALDH8A1 ALDOB ALDOC ALG8 ALMS1 ALPP ANK1 ANKHD1 ANP32B AP2B1 AP3S1 AP3S2 APBB3 APLP2 APOH ARF5 ARF6 ARFRP2 ARG2 ARGBP2 ARHGAP19 ARHGEF2 ARMCX2 ARNT2 ARSD ASPH ASTN ATP11A ATP2A3 ATP2B1 ATP2B4 ATP5C1 A…
39	V$OSF2_Q6	680	680	496	9672	6472	-2.31	0	0.08	0.04	13CDNA73 AANAT ABCE1 ABLIM3 ACACA ACCN1 ACO2 ACSL6 ACYP2 ADAM18 ADAM22 ADAMDEC1 ADK ADORA2B AFM AGTR1 AGXT AKAP12 AKAP4 AKR1B1 AKR1C4 ALDH1A2 ALDH3A2 ALDOC ALPP AMFR ANK1 ANKHD1 ANKRD25 ANP32B AP2B1 AP3S2 APOH ARF3 ARF5 ARG2 ARGBP2 ARMCX2 ARSD ASPH ATP11A ATP5C1 ATP5E ATP6V0E ATP8A2 AVPR1A B3GALT2 BAI2 BATF BCAP29 BCL2 BGR BICD2 BIRC2 BMP4 BMX BPESC1 BPI BRD1 BTN2A2 BZRAP1 C10orf76 C14orf114 C17o…
40	V$SREBP1_Q6	519	519	657	6788	9356	-2.31	0	2.46	0.35	AANAT ACACA ACAD8 ACCN1 ACSL6 ACTL7B ACTN1 ACYP2 ADAM30 ADCY2 ADD3 ADK ADORA2B AGXT AKAP4 AKR1B1 ALDH1A2 ALDH8A1 ALPP AMFR APBB3 ARG2 ARGBP2 ARHGEF2 ARMCX2 ATF5 ATP11A ATP2A3 ATP5H ATP6V0E ATR BAHD1 BATF BCL11A BCL2 BGR BHLHB2 BICD2 BPI BRAP BZRAP1 BZRP C11orf9 C14orf1 C14orf114 C16orf33 C18orf1 C1QDC1 C1S C1orf21 C20orf111 C20orf19 C20orf67 C21orf2 C5orf4 C6orf109 C6orf162 C6orf32 CA1 CA11 CABP1…
41	V$TCF11MAFG_01: TCF11:MafG heterodimers	108	108	1068	1253	14891	-2.38	0	3.05	0.5	AANAT ABAT ABLIM3 ADAMDEC1 ADD3 AMFR ARGBP2 ARHGAP19 B3GALT2 BAHD1 BAI3 BGR C14orf114 C16orf33 C20orf111 C5orf4 C6orf32 CABP1 CAMKK2 CASP4 CD44 CDK7 CENPE COAS2 CSF1 CSGlcA-T DCLRE1A DMD DNAI2 DNCI2 EIF3S9 EIF4E2 ENSA FKBP3 FLJ10618 FLJ11767 FXR2 FZR1 GALGT GATA3 GCLC GNAS GPATC3 GRIA2 GRM5 HBLD2 HTN3 IDS IFI27 IL12B IL24 INA KCNAB1 KIR2DL5 KL KLRA1 LCE2B LIR9 LRP1B MAN1A1 MAPK1 MARCH6 MBTD1 MGC2…
42	V$LDSPOLYA_B: Lentiviral Poly A downstream element	802	802	374	11323	4821	-2.39	0	0.08	0.04	13CDNA73 AANAT ABAT ABCB1 ABCE1 ABLIM3 ACACA ACAD8 ACCN1 ACO2 ACSL6 ACTL7B ACTR8 ACYP2 ADAM18 ADAM22 ADAM30 ADAMDEC1 ADAMTS6 ADARB2 ADCY2 ADD3 ADH1A ADORA2B AGTR1 AKAP12 AKAP4 AKR1B1 AKR1C4 ALDH1A2 ALDH8A1 ALDOB ALG8 ALPP AMFR ANK1 ANKRD25 AP3S1 AP3S2 APLP2 APOH ARF3 ARF6 ARFRP2 ARGBP2 ARHGAP19 ARMCX2 ASPH ASTN ATF5 ATP11A ATP2B1 ATP2B2 ATP2B4 ATP5H ATRN AVPR1A B3GALT2 B4GALT5 BAI3 BATF BCAP29 BC…
43	V$E2F_Q4_01	345	345	831	4429	11715	-2.4	0	2.46	0.35	ABLIM3 ACACA ACCN1 ADARB2 ADD3 ADK AFM AKAP12 AKR1B1 ALDH1A2 ALG8 AMFR ANKHD1 ANP32B AP2B1 AP3S2 APLP2 ARF5 ARF6 ARFRP2 ARG2 ARGBP2 ARHGAP19 ARHGEF2 ATP2A3 ATP2B2 ATP2B4 ATP5C1 ATP6V0E ATP6V1D ATP8A2 B4GALT5 B4GALT6 BCL11A BIRC2 BMX BRD1 BTG3 C10orf76 C16orf33 C1orf41 C20orf111 C3orf14 C4orf9 C6orf145 C7orf28A CA1 CALM3 CASK CASP8AP2 CCL22 CD44 CD79B CDC14B CDC2L6 CDC34 CDC42EP4 CDH10 CDIPT CDK7 …
44	V$EVI1_05: ectopic viral integration site 1 encoded factor	76	76	1100	845	15299	-2.45	0	3.14	0.5	ABCB1 ADAM18 AKAP12 ALDH8A1 APOH ATP6V1D BAI3 C6orf106 C6orf162 C6orf32 CASP4 CD1B CDC27 CEPT1 CESK1 CHRNA9 CLCN3 CLDN10 CLTA COAS2 COG2 COL21A1 CSF2RA CSNK1G3 CST1 CYP19A1 DDX28 DHRS9 DIO2 DNCI2 ENTPD3 EPHA2 FETUB FKBP8 GNB1L GRM5 GTSE1 HLA-DPA1 ILT7 KCNC3 KIF13B KIF2 KLRA1 KRTAP5-9 LILRB6 LRRN3 MACF1 MAT1A MKKS NEBL NEUROD4 NRXN1 PDC PHF20L1 PIN4 PPP1R12B PRKAR2B PRL PRP19 RAP140 RGS5 SECP43 SI…
45	V$PIT1_Q6	773	773	403	10913	5231	-2.47	0	0.09	0.04	13CDNA73 AANAT ABAT ABCB1 ABCE1 ABLIM3 ACACA ACAD8 ACTL7B ACTR8 ACYP2 ADAM18 ADAM22 ADAM30 ADAMDEC1 ADAMTS6 ADARB2 ADD3 ADH1A ADK AFM AGTR1 AKAP12 AKAP4 AKR1B1 AKR1C4 ALDH1A2 ALDOB ALDOC ALG8 ALMS1 ALPP AMFR ANK1 ANP32B AP2B1 AP3S2 APBB3 APLP2 APOH ARF3 ARF5 ARF6 ARG2 ARGBP2 ARHGAP19 ARNT2 ASPH ASTN ATP2A3 ATP2B1 ATP5C1 ATP5E ATP6V1D ATP8A2 ATR ATRN AVPR1A B3GALT2 B4GALT5 B4GALT6 BAI2 BAI3 BATF B…
46	V$WHN_B: winged-helix factor nude	413	413	763	5369	10775	-2.48	0	2.29	0.34	13CDNA73 ACAD8 ACTN1 ADARB2 ADCY2 ADD3 ADK AKAP12 ALDH1A2 ALMS1 AMFR ANKHD1 ANP32B AP3S1 ARF5 ARF6 ARFRP2 ATF5 ATP11A ATP5H ATR B4GALT6 BBS4 BHLHB2 BICD2 BIRC2 BMP4 BPI BRAP BRD1 BZRAP1 C11orf9 C17orf25 C18orf1 C1S C1orf21 C1orf41 C20orf111 C21orf2 C4orf8 C4orf9 C6orf106 CA11 CALM3 CAMKK2 CAP350 CAPZA1 CASK CASP8AP2 CD200 CD40 CD44 CDH1 CDH11 CDIPT CDK7 CDKN2D CEPT1 CGGBP1 CHD3 CHKB CLCN3 CLCNKB …
47	V$PAX5_01: B-cell-specific activating protein	181	181	995	2228	13916	-2.49	0	2.64	0.45	ABAT ACCN1 ACTN1 ADAM30 ADARB2 ADCY2 AKR1C4 ANKHD1 ANKRD25 APLP2 ASPH ATP5C1 B4GALT6 BBS4 BBS7 BCAP29 BMX BZRP C14orf114 C1S C1orf21 C20orf111 C6orf145 C6orf210 CA1 CALM1 CAMP CAPZA1 CCL20 CD40 CDC14B CDK5R1 CDKN2D CHRNA1 CLTA CNOT6 COBLL1 CRIM1 CSPG5 CST1 CTAGE5 CTBP2 CUTL1 CYP19A1 DALRD3 DET1 DHX9 DIABLO DKFZP564J0123 DKFZp547K1113 DMD DMN DOCK4 DSP EIF5 ELF3 ENSA ESRRA FCGR2C FKBP8 FLJ10521 FL…
48	V$GATA2_02: GATA-binding factor 2	371	371	805	4799	11345	-2.5	0	2.3	0.34	ABCB1 ABCE1 ACACA ACAD8 ACCN1 ACTR8 ACYP2 ADAM30 ADAMDEC1 ADD3 AFM AGTR1 AGXT AKAP4 AKR1C4 ALDH1A2 ALDH8A1 ALDOB ALG8 AP2B1 APLP2 APOH ARF6 ARFRP2 ARGBP2 ARHGAP19 ARMCX2 ARSD ASPH ASTN ATP2A3 ATP2B1 ATP5C1 ATP5H ATP8A2 B4GALT5 BAHD1 BAI3 BATF BBS7 BMP4 BMX BPI BRAP C11orf9 C1QDC1 C20orf67 C21orf2 C21orf62 C6orf106 C6orf162 C6orf210 C6orf32 C9orf36 CACNG3 CADPS2 CAMK1G CAMKK2 CAMP CAP350 CAPZA1 CA…
49	V$CREBP1_Q2: CRE-binding protein 1	108	108	1068	1264	14880	-2.52	0	2.87	0.5	ACO2 ADAMTS6 ADK AP2B1 APOH ARF5 ARG2 BBS7 BCL11A BIRC2 C16orf33 C17orf25 C18orf1 C20orf111 C20orf67 C3orf14 C6orf106 CAPZA1 CASP9 CDC14B CENPE CGA CHAF1A CLCN3 CNDP2 CTAGE5 DDX18 DIO2 DKFZP434A0131 DLX2 DMD DNAJA4 EGR1 ENSA EPHA2 ERF FADS1 FAM50A FLJ10618 FLJ13646 FLJ38984 FN1 FRAT1 GABBR1 HBLD2 HCNGP HMGCR HS3ST2 IL10RA IL9R INA ING3 KCNA5 KCTD15 KIR2DL5 LDHA LTBP1 MCAM MGC10471 MTF1 MVK N4BP1 …
50	V$VMYB_01: v-Myb	896	896	280	12017	4127	-2.54	0	2.34	0.35	13CDNA73 ABAT ABCB1 ABCE1 ACACA ACAD8 ACCN1 ACSL6 ACTN1 ACTR8 ACYP2 ADAM18 ADAM22 ADAM30 ADAMTS6 ADARB2 ADCY2 ADD3 ADH1A ADK AFM AGTR1 AKAP12 AKAP4 AKR1B1 AKR1C4 ALDH1A2 ALDH3A2 ALDH8A1 ALDOB ALG8 ALMS1 AMFR ANK1 ANKHD1 ANKRD25 AP2B1 AP3S1 AP3S2 APBB3 APOH ARF3 ARF5 ARF6 ARFRP2 ARG2 ARGBP2 ARHGAP19 ARHGEF2 ARMCX2 ARNT2 ASPH ASTN ATP11A ATP2B1 ATP2B4 ATP5C1 ATP5E ATP5H ATP8A2 ATR AVPR1A B3GALT2 B4…
51	V$ATF4_Q2: activating transcription factor 4	368	368	808	5344	10800	-2.54	0	0.1	0.04	13CDNA73 AANAT ABAT ABCE1 ACCN1 ACTL7B ACTN1 ACYP2 ADAM30 ADAMDEC1 ADAMTS6 ADARB2 ADD3 ADK ALDOC ALG8 ANKHD1 ANKRD25 AP2B1 AP3S1 APOH ARF3 ARF5 ARF6 ARG2 ARGBP2 ARHGAP19 ARSD ATF5 ATP11A ATR ATRN B4GALT6 BAHD1 BBS7 BICD2 BIRC2 BPESC1 BRD1 BZRP C10orf76 C11orf9 C17orf25 C18orf1 C1S C1orf41 C20orf111 C20orf19 C20orf67 C21orf62 C22orf3 C3orf14 C4orf8 C6orf106 C6orf162 C6orf62 CA11 CAP350 CASP8AP2 CA…
52	V$HAND1E47_01: Hand1:E47 heterodimer	663	663	513	9397	6747	-2.55	0	0.11	0.04	13CDNA73 AANAT ABCB1 ABCE1 ABLIM3 ACACA ACAD8 ACCN1 ACSL6 ACTN1 ACTR8 ACYP2 ADAM18 ADAM22 ADAMTS6 ADARB2 ADK ADORA2B AGXT AKAP12 AKR1B1 AKR1C4 ALDH8A1 ALDOB ALDOC ALMS1 ANKRD25 AP2B1 AP3S2 APBB3 APLP2 ARF3 ARF6 ARFRP2 ARG2 ARMCX2 ARNT2 ASPH ATF5 ATP2A3 ATP2B1 ATP2B2 ATP2B4 ATP5C1 ATP5H ATP6V1D ATR ATRN AVPR1A B4GALT5 B4GALT6 BAHD1 BAI2 BAI3 BATF BBS4 BBS7 BCL11A BCL11B BCL2 BGR BHLHB2 BICD2 BMP4 …
53	V$HNF3B_01: Hepatocyte Nuclear Factor 3beta	821	821	355	10981	5163	-2.55	0	2.24	0.33	13CDNA73 AANAT ABAT ABCB1 ABCE1 ABLIM3 ACACA ACAD8 ACCN1 ACTR8 ACYP2 ADAM18 ADAM22 ADAMDEC1 ADAMTS6 ADARB2 ADD3 ADH1A ADK AFM AGTR1 AGXT AKAP12 AKAP4 AKR1C4 ALDH1A2 ALDH3A2 ALDH8A1 ALDOB ALG8 ALMS1 ANK1 ANP32B AP2B1 AP3S1 AP3S2 APLP2 APOH ARF3 ARF6 ARFRP2 ARG2 ARGBP2 ARHGAP19 ARMCX2 ARSD ASPH ASTN ATF5 ATP2B1 ATP5C1 ATP5E ATP6V0E ATR AVPR1A B3GALT2 B4GALT5 BAI3 BATF BBS7 BCAP29 BCL11A BCL11B BCL2…
54	V$GATA3_03: GATA-binding factor 3	654	654	522	9265	6879	-2.59	0	0.12	0.04	13CDNA73 ABAT ABCB1 ABCE1 ACACA ACAD8 ACO2 ACTL7B ACTR8 ACYP2 ADAM18 ADAM22 ADAM30 ADAMDEC1 ADAMTS6 ADARB2 ADD3 ADH1A AFM AGTR1 AGXT AKAP12 AKAP4 AKR1C4 ALDH1A2 ALDOC ALG8 ALMS1 AP2B1 AP3S1 APOH ARF5 ARF6 ARFRP2 ARG2 ARGBP2 ARMCX2 ARSD ASPH ASTN ATP2B1 ATP2B4 ATP5E ATP5H ATP6V1D ATP8A2 AVPR1A B3GALT2 B4GALT5 BAI3 BATF BBS4 BBS7 BCL11A BCL11B BCL2 BIRC2 BMP4 BMX BPESC1 BPI BRD1 C10orf76 C11orf9 C1…
55	V$HNF1_01: hepatic nuclear factor 1	228	228	948	2874	13270	-2.6	0	2.38	0.35	13CDNA73 AANAT ABAT ABCB1 ADAM18 ADD3 AFM AKR1C4 ALDOB AP3S1 APOH ARG2 ARHGAP19 ARMCX2 ASTN ATP2B1 ATP2B4 ATP6V1D ATR BAI3 BBS4 BCAP29 BMX C17orf25 C20orf19 C20orf67 C5orf4 C6orf109 C6orf62 CA1 CA11 CAMK1G CASP4 CASP5 CAST CCND3 CD40 CD44 CDIPT CDK7 CDKN2D CENTG1 CEPT1 CFLAR CHD2 CHKB CHRNA1 CLDN10 CLTA CNDP2 COX4I1 CRP CSF2RA D2LIC DAZAP2 DEC1 DHX9 DJ462O23.2 DKFZp547K1113 DLG1 DMD DNCI2 DNTT DU…
56	V$CEBPGAMMA_Q6	802	802	374	10734	5410	-2.62	0	2.11	0.33	13CDNA73 AANAT ABAT ABCB1 ABCE1 ABLIM3 ACACA ACAD8 ACCN1 ACO2 ACSL6 ACTL7B ACTR8 ACYP2 ADAM18 ADAM22 ADAM30 ADAMDEC1 ADAMTS6 ADARB2 ADD3 ADH1A ADK ADORA2B AFM AGTR1 AGXT AKAP12 AKAP4 AKR1B1 AKR1C4 ALDH1A2 ALDH8A1 ALDOB ALG8 ALMS1 ANK1 AP2B1 AP3S1 APLP2 APOH ARF3 ARF5 ARFRP2 ARG2 ARGBP2 ARHGAP19 ARMCX2 ARNT2 ARSD ASPH ASTN ATF5 ATP2B1 ATP5C1 ATP5E ATP5H ATP8A2 ATR AVPR1A B3GALT2 B4GALT5 BAI3 BATF …
57	V$CETS168_Q6	753	753	423	10612	5532	-2.63	0	0.12	0.04	13CDNA73 AANAT ABAT ABCB1 ABLIM3 ACACA ACCN1 ACO2 ACSL6 ACTL7B ACYP2 ADAMTS6 ADARB2 ADD3 ADK ADORA2B AGTR1 AGXT AKAP12 AKAP4 AKR1B1 ALDH1A2 ALDH3A2 ALDOB ALDOC ALG8 ALPP ANK1 ANKHD1 AP3S1 AP3S2 APBB3 APLP2 ARF3 ARFRP2 ARGBP2 ARHGEF2 ARSD ATP11A ATP2A3 ATP2B1 ATP2B2 ATP2B4 ATP5E ATP5H ATP6V0E ATP6V1D ATR B3GALT2 B4GALT6 BAHD1 BATF BBS4 BCAP29 BGR BIRC2 BMP4 BMX BPESC1 BRAP BRD1 BZRP C10orf76 C11or…
58	V$E2F_Q6_01	214	214	962	2691	13453	-2.64	0	2.35	0.35	ACACA AKAP12 AKR1B1 ALDH1A2 ALG8 AMFR APLP2 ARF6 ARG2 ARGBP2 ARHGEF2 ATP2A3 ATP2B4 ATP5C1 ATP8A2 B4GALT6 BCL11A BIRC2 BMX BTG3 C1orf41 C20orf111 C3orf14 C6orf145 C7orf28A CA1 CALM3 CASK CASP8AP2 CCL22 CD44 CD79B CDC14B CDC2L6 CDC34 CDH10 CDIPT CGI-12 CHAF1A CLCN3 CLN8 CMKLR1 CNOT1 COBLL1 COL21A1 COL4A1 COX4I1 COX7C CRIM1 CTTN CUTL1 D2LIC DAPK3 DCLRE1A DDAH2 DHX9 DJ462O23.2 DLGAP4 DMD DOCK4 DZIP1 …
59	V$HNF1_C: Hepatic nuclear factor 1	401	401	775	5235	10909	-2.64	0	2.08	0.33	13CDNA73 ABAT ABCB1 ABCE1 ACACA ACTN1 ACYP2 ADAM18 ADAM22 ADAMDEC1 ADARB2 ADD3 ADH1A AFM AGXT AKAP12 AKAP4 AKR1C4 ALDH1A2 ALDH8A1 ALDOB ALPP AP2B1 AP3S1 APOH ARF3 ARF5 ARG2 ARGBP2 ARHGAP19 ARMCX2 ASPH ASTN ATP2B1 ATP5C1 ATP5E ATP6V0E ATR AVPR1A B3GALT2 BAI3 BBS4 BBS7 BCAP29 BICD2 BMX BPI C10orf76 C14orf114 C17orf25 C1S C1orf21 C3orf14 C5orf4 C6orf109 C6orf145 C6orf162 C6orf32 C6orf62 CA1 CADPS2 C…
60	V$BARBIE_01: barbiturate-inducible element	585	585	591	7759	8385	-2.67	0	1.97	0.33	ABAT ACAD8 ACO2 ACSL6 ACTN1 ACTR8 ACYP2 ADAMDEC1 ADAMTS6 ADD3 ADH1A ADK ADORA2B AGXT AKR1B1 ALDH1A2 ALDOB ALG8 ANK1 ANKRD25 ANP32B AP2B1 AP3S1 APBB3 APLP2 APOH ARF3 ARGBP2 ARHGAP19 ARHGEF2 ARMCX2 ASPH ASTN ATP11A ATP2A3 ATP2B1 ATP2B2 ATP2B4 ATP5E ATR ATRN AVPR1A B3GALT2 BAI3 BBS7 BCL11A BCL2 BIRC2 BMP4 BMX BPESC1 BPI BRD1 BTG3 BTN2A2 BZRP C16orf33 C1QDC1 C1S C1orf21 C20orf19 C22orf3 C5orf4 C6orf1…
61	V$DR4_Q2: direct repeat 4	1030	1030	146	14363	1781	-2.67	0	0.07	0.04	13CDNA73 AANAT ABAT ABCB1 ABCE1 ABLIM3 ACACA ACAD8 ACCN1 ACO2 ACSL6 ACTL7B ACTR8 ACYP2 ADAM18 ADAM22 ADAM30 ADAMDEC1 ADAMTS6 ADD3 ADH1A ADK ADORA2B AGTR1 AGXT AKAP12 AKAP4 AKR1C4 ALDH1A2 ALDH3A2 ALDH8A1 ALDOB ALDOC ALG8 ALMS1 ALPP AMFR ANK1 ANKHD1 ANKRD25 AP2B1 AP3S1 AP3S2 APBB3 ARF3 ARF5 ARF6 ARFRP2 ARG2 ARGBP2 ARHGAP19 ARHGEF2 ARMCX2 ARNT2 ARSD ASPH ASTN ATP11A ATP2A3 ATP2B1 ATP2B2 ATP2B4 ATP5C…
62	V$CDX2_Q5	661	661	515	9340	6804	-2.69	0	0.14	0.04	13CDNA73 ABAT ABCB1 ABLIM3 ACACA ACAD8 ACCN1 ACSL6 ACYP2 ADAM18 ADAM22 ADAM30 ADAMDEC1 ADARB2 ADD3 ADK ADORA2B AFM AGTR1 AGXT AKAP12 AKAP4 AKR1C4 ALDH1A2 ALDH8A1 ALDOB ALG8 ALMS1 AMFR ANP32B AP2B1 AP3S1 AP3S2 APBB3 APLP2 APOH ARF3 ARF5 ARF6 ARFRP2 ARG2 ARGBP2 ARHGAP19 ARMCX2 ARNT2 ARSD ASPH ASTN ATP2B1 ATP2B4 ATP5C1 ATP5E ATP8A2 ATRN AVPR1A B3GALT2 B4GALT5 BAHD1 BAI3 BATF BBS4 BBS7 BCAP29 BCL11B …
63	V$CREBP1CJUN_01: CRE-binding protein 1:c-Jun heterodimer	71	71	1105	797	15347	-2.72	0	2.86	0.5	ABCE1 ADAMTS6 ADK ANP32B AP2B1 ARG2 B3GALT2 BBS7 BIRC2 C17orf25 C18orf1 C3orf14 CDC14B CDIPT CENPE CGA CLCN3 CNDP2 DDX18 DIO2 DKFZP434A0131 EPHA2 FADS1 FAM50A FLJ10618 FN1 FRAT1 GABBR1 HRBL HS3ST2 IL10RA KCNA5 LDHA LTBP1 MCAM MTF1 MVK N4BP1 NDUFA10 NEK9 NEUROD6 NFX1 NID NOLC1 NUP214 NUP98 P2RY10 PCSK1 PDHA1 PEG3 PPP2CA PRC1 PSD3 RENT1 RIPK5 RNASE2 RNPS1 SAV1 SCYL2 SEC63 SLC6A2 SMU1 SNRK SPAG6 SST…
64	V$E2F4DP2_01: E2F-4:DP-2 heterodimer	216	216	960	2729	13415	-2.73	0	2.24	0.33	ACACA ACCN1 ACO2 ACTN1 ADCY2 ADK AKAP12 ALG8 ALPP AMFR ANK1 ARHGEF2 ARNT2 ATP6V1D BBS4 BTN2A2 C10orf76 C16orf33 C17orf25 C1orf41 C20orf111 C20orf67 C22orf3 C3orf14 C6orf62 CA11 CALM3 CAMKK2 CASP8AP2 CCDC6 CD44 CDC14B CDC2L6 CDKN2D CFLAR CLCNKB CLTA COBLL1 COG2 COX7C CPT2 CTDSPL CUTL1 D2LIC DCLRE1A DET1 DJ462O23.2 DLGAP4 DOCK4 DUSP10 E2F3 EDF1 EFS EGR1 EIF2AK1 EIF3S12 EIF4E2 ELOVL2 ENSA EVI1 EWSR1…
65	V$E2F1_Q4: E2F-1	483	483	693	6377	9767	-2.74	0	1.89	0.33	ABAT ABLIM3 ACACA ACAD8 ACCN1 ACSL6 ADAM22 ADD3 ADK AFM AKAP12 AKR1B1 ALDH1A2 ALDOC ALG8 AMFR ANK1 ANKHD1 ANP32B AP2B1 APLP2 ARF5 ARFRP2 ARG2 ARGBP2 ARHGAP19 ARHGEF2 ATP2A3 ATP2B1 ATP2B2 ATP2B4 ATP5E ATP6V0E ATP8A2 ATRN B4GALT5 B4GALT6 BAHD1 BAI2 BCAP29 BCL11A BMP4 BMX BPI BTG3 C10orf76 C14orf1 C16orf33 C18orf1 C1QDC1 C1orf41 C20orf67 C21orf2 C22orf3 C3orf14 C4orf9 C6orf145 C6orf62 C9orf36 CA1 CA…
66	V$FOXJ2_02: fork head box J 2	456	456	720	6010	10134	-2.75	0	1.88	0.33	ABCB1 ACACA ACTR8 ADAM18 ADAM22 ADAMDEC1 ADD3 ADH1A ADK AFM AGTR1 AGXT AKAP4 AKR1C4 ALDH1A2 ALDOB ALG8 ALMS1 ALPP ANK1 ANKRD25 AP2B1 ARFRP2 ARG2 ARGBP2 ARHGAP19 ARSD ASPH ASTN ATP2B1 ATP5C1 ATP5E ATP6V0E ATR AVPR1A BBS4 BBS7 BCL2 BMP4 BMX BPESC1 BRD1 C14orf114 C16orf33 C18orf1 C21orf2 C21orf62 C3orf14 C6orf109 C6orf162 C6orf32 C9orf36 CA1 CACNG3 CALM1 CALM3 CASP4 CASP5 CAST CCIN CCL20 CCND3 CD1B …
67	V$DEAF1_02	50	50	1126	532	15612	-2.76	0	2.98	0.5	ACACA ACO2 AKAP4 APLP2 ARFRP2 BBS4 BCL11B BMX C4orf9 CDC27 CEPT1 CGI-12 CHKB CREBBP CTBP2 DALRD3 DNCH1 DUSP10 EFS ELOVL2 FBN2 GBA GCH1 GNAS IMP4 INADL MAP2K3 MINPP1 MTHFD1 N4BP1 NDUFA10 NDUFA3 NOLC1 NRG1 NUFIP1 PEX11A PRP19 PTPRN2 RAB35 RPL28 SDC1 SKIP SLC12A9 SMAD3 SPAG6 TCF7L1 TM4SF6 TRIO VSNL1 ZF
68	V$MAF_Q6	44	44	1132	457	15687	-2.77	0	3.04	0.5	ACTN1 BMP4 CAST CCL22 CDK7 CHRNA9 CLEC7A COX4I1 CRYM CSNK2A2 DDC EHD1 EPHA2 ETFA ETV1 GPRC5C ICAM1 MCM3AP MGC23401 MGC5297 NDUFB8 NDUFV2 NPAS1 NUP214 PRKAR2A R3HDM RASGRP3 REM1 RIMS2 RIPK5 RNF11 RSU1 SAV1 SCGB1D2 SFN SGTA SOX2 SPTLC2 SYK TLR1 TNNC2 TP53I3 TTC17 ZNF305
69	V$TAXCREB_01: Tax/CREB complex	70	70	1106	788	15356	-2.78	0	2.79	0.49	ADAM22 ADK ALDH3A2 ARG2 ATP2A3 BPI C11orf9 CAP350 CASK CASP9 CDIPT CHAF1A CREBBP CSF2RB DKFZp547K1113 DLG1 DLGAP2 ETFA FDFT1 FGFR1OP FLJ38984 FOXO3A GABRA5 GALNT10 HBLD2 HNRPDL IL10RA IRAK4 ITGB1 KIAA0528 KIR2DL5 KPNA1 LRRFIP1 LUC7L2 MCAM MGAT2 MGC23401 MRCL3 NDUFV2 NEK9 NRP2 NT5E NUFIP1 PAK3 PEG3 PER2 POLDIP3 PRC1 PRKD2 PSMB2 PTCRA QP-C RENBP RNASEH2A RNPS1 RPL28 RRAD RTN1 SCFD1 SHANK2 SHREW1 SL…
70	V$E2F1DP2_01: E2F-1:DP-2 heterodimer	140	140	1036	1713	14431	-2.78	0	2.39	0.35	ACACA ACO2 ADCY2 ADK AKAP12 ALG8 ALPP AMFR ARHGEF2 C16orf33 C1orf41 C20orf111 C20orf67 C22orf3 C3orf14 CA11 CALM3 CAMKK2 CASP8AP2 CCDC6 CD44 CDC2L6 CDKN2D CFLAR CLCNKB COBLL1 COX7C CPT2 CUTL1 D2LIC DCLRE1A DET1 DJ462O23.2 DOCK4 DUSP10 E2F3 EDF1 EIF2AK1 EIF4E2 ELOVL2 ENSA FAM32A FCAR FGFR1 FGFR3 FLJ10618 FLJ10986 FLJ12716 FN1 FSD1 FXYD6 GAPD GBA GLRA3 HBLD2 HNRPA3 IDS IFIH1 IGSF4C ING3 INSR IQSEC1…
71	V$USF_Q6: upstream stimulating factor	851	851	325	11443	4701	-2.8	0	1.92	0.33	13CDNA73 ABAT ABCB1 ABCE1 ABLIM3 ACACA ACAD8 ACO2 ACSL6 ACTN1 ADAM22 ADAM30 ADAMTS6 ADCY2 ADD3 ADK ADORA2B AGTR1 AKAP12 AKR1B1 AKR1C4 ALDH1A2 ALDH3A2 ALDH8A1 ALDOC ALG8 ALMS1 ALPP AMFR ANK1 ANKHD1 ANKRD25 ANP32B AP2B1 AP3S1 AP3S2 APBB3 APLP2 ARF5 ARF6 ARFRP2 ARG2 ARHGEF2 ARMCX2 ARSD ASPH ATF5 ATP11A ATP2A3 ATP2B1 ATP2B2 ATP5C1 ATP5H ATP6V0E ATP6V1D ATP8A2 B3GALT2 B4GALT6 BAI2 BATF BBS4 BCAP29 BCL…
72	V$E2A_Q2	787	787	389	10564	5580	-2.8	0	1.85	0.33	13CDNA73 AANAT ABAT ABCE1 ACACA ACAD8 ACCN1 ACO2 ACSL6 ACTL7B ACTN1 ACTR8 ACYP2 ADAM22 ADCY2 ADD3 ADH1A ADK ADORA2B AFM AGTR1 AGXT AKAP12 AKAP4 ALDH1A2 ALDH3A2 ALDH8A1 ALDOB ALDOC ALMS1 ALPP AMFR ANK1 ANKHD1 ANKRD25 ANP32B AP2B1 AP3S2 APOH ARF3 ARF6 ARG2 ARGBP2 ARMCX2 ARNT2 ARSD ASPH ATP11A ATP2B2 ATP5C1 ATP5H ATP6V1D AVPR1A B4GALT5 B4GALT6 BAI2 BATF BBS4 BCL11B BCL2 BGR BHLHB2 BIRC2 BMP4 BMX BPE…
73	V$BACH2_01: BTB and CNC homolog 2	794	794	382	11136	5008	-2.8	0	0.15	0.05	ABAT ABCE1 ABLIM3 ACACA ACO2 ACSL6 ACTL7B ACTR8 ADAM18 ADAM30 ADAMDEC1 ADARB2 ADCY2 ADD3 ADH1A ADK AFM AGTR1 AGXT AKAP12 AKAP4 AKR1B1 AKR1C4 ALDH1A2 ALDH3A2 ALDH8A1 ALDOB ALG8 ALMS1 ALPP AMFR ANK1 ANP32B AP2B1 AP3S1 AP3S2 APBB3 APLP2 APOH ARF3 ARF5 ARF6 ARFRP2 ARGBP2 ARHGAP19 ARMCX2 ARSD ASPH ASTN ATF5 ATP2B2 ATP2B4 ATP5C1 ATP5H ATP6V0E ATP6V1D ATP8A2 ATRN AVPR1A B3GALT2 B4GALT5 B4GALT6 BAHD1 BAI…
74	V$HIF1_Q5: hypoxia-inducible factor 1	201	201	975	2539	13605	-2.82	0	2.15	0.33	AGXT ALDH1A2 ALDH3A2 ALDOC ALPP ANK1 ANKRD25 ANP32B AP2B1 ARGBP2 ATP2A3 ATP8A2 ATRN B4GALT6 BCL11A BCL11B BPESC1 BTG3 BTN2A2 C18orf1 C20orf111 C4orf9 C6orf162 CASK CAST CDC34 CDK5R1 CDK7 CEPT1 CGI-12 CHAF1A CHD2 CLCN3 CLCNKB CLIPR-59 CNOT1 CNR1 COL4A1 COL8A2 COMT COX7C CR1 CSF2RA CSGlcA-T CSPG5 CTBP1 CTTN CUTL1 DAPK3 DDX18 DET1 DIO2 DLX2 DNCH1 DRD4 EDF1 EHD1 EIF3S9 ENSA ERF F8A1 FBN2 FKBP3 FLJ109…
75	V$SOX5_01: Sox-5	492	492	684	6521	9623	-2.82	0	1.76	0.33	13CDNA73 ABAT ABCB1 ABCE1 ABLIM3 ACACA ACAD8 ACO2 ADAM22 ADAM30 ADAMDEC1 ADARB2 ADD3 ADORA2B AGTR1 AKAP4 AKR1C4 ALDH1A2 ALDH8A1 ALDOB ALDOC ALG8 AMFR ANKHD1 ANP32B AP2B1 APOH ARF3 ARF5 ARG2 ARHGEF2 ARMCX2 ASTN ATP2B1 ATP2B4 ATP6V0E ATR AVPR1A B3GALT2 B4GALT5 BBS4 BCAP29 BCL2 BGR BICD2 BIRC2 BMX BPESC1 BPI C10orf76 C14orf114 C16orf33 C18orf1 C1S C1orf21 C20orf19 C21orf62 C4orf8 C5orf4 C6orf109 C6o…
76	V$NRF2_01: nuclear respiratory factor 2	238	238	938	3499	12645	-2.82	0	0.12	0.04	ACAD8 ACO2 ADAM22 ADK AGXT ALDH1A2 ALDH3A2 ALG8 ALMS1 ANKHD1 AP3S1 AP3S2 APBB3 ARF3 ARHGAP19 ASPH ATP11A ATP2A3 ATP5E ATP5H ATP6V1D ATR B4GALT6 BBS4 BCL11A BCL2 BMP4 BMX BPI BRAP BTG3 C14orf1 C1QDC1 C20orf18 C21orf2 C22orf3 C3orf14 C7orf28A CAP350 CASP9 CCDC6 CCND3 CDC27 CDC34 CDC42EP4 CDIPT CDK5R1 CEPT1 CHKB CLTA CNAP1 COG2 COMT COX4I1 COX6A1 CRYZ CSGlcA-T CSNK1A1 CTBP1 CTTN CYBRD1 DALRD3 DDAH2 …
77	V$CACCCBINDINGFACTOR_Q6	138	138	1038	1690	14454	-2.82	0	2.35	0.35	ABAT ANKRD25 ARHGEF2 BAI2 BZRAP1 C1S C21orf2 C6orf106 C6orf109 CAST CCL22 CD72 CDH1 CDK7 CHD3 CLCNKB COX4I1 CSF1 CSF2RB CSNK2A2 CSPG5 CTBP1 CTBP2 CUTL1 DAZAP2 DDC DLX2 DNAJA4 DR1 EHD1 ENTPD3 FADS1 FAM50A FAM53B FBXO3 FCN1 FLJ10521 FLJ10986 FLJ11767 FLJ13197 FLJ13725 FLJ23420 FLNC FLT3LG FRG1 FTH1 FYCO1 GCAT GCLC GLUD1 GLUL GPR17 GRPEL1 GTSE1 HBB HBG1 HERC1 HIC HS3ST2 ICA1 IGSF4B IGSF4C ITGA6 ITGB…
78	V$SF1_Q6	153	153	1023	2319	13825	-2.84	0	0.1	0.04	AANAT ACAD8 ACSL6 ADAMDEC1 ADCY2 ADD3 AKAP4 ALDH1A2 ALDH8A1 ALDOC ALPP ARF6 ATP2B4 ATP6V0E ATRN BATF BGR BPESC1 BTN2A2 C10orf76 C5orf4 C6orf106 CASP9 CAST CCDC6 CCIN CEPT1 CGA CHD2 CLCNKB CLDN10 COX6A1 CRYM CSGlcA-T CTTN Cep192 DAZAP2 DDX1 DDX52 DEC1 DET1 DKFZP434H132 DLG1 DMD DNCI2 DNTT DUSP10 ESRRA FAM53B FCN1 FLJ00060 FLJ10847 FLJ10986 FXR2 FZR1 GABRQ GDAP1L1 GPM6A HBB HBG1 HLA-DPA1 HMGCR HPGD…
79	V$CHX10_01	42	42	1134	438	15706	-2.9	0	2.91	0.5	ACAD8 AP3S1 ATR BMX CASP5 CENTG1 CGA CSNK1A1 D2LIC ETV1 FLJ20618 GNAS GPM6A GPRC5C GRAP H2AFX IFIH1 IMP4 IQSEC1 KCNAB1 KIAA0992 KLHL20 MAB21L1 PARP1 PDC PIK3R1 PIN4 PPARD RFXAP RTN1 SASH1 SEC63 SKIP SLC35A1 SPTLC2 TAC1 TAGLN3 TNKS WDFY3 YIF1 ZA20D3 ZNF267
80	V$IK1_01: Ikaros 1	667	667	509	8945	7199	-2.91	0	1.61	0.33	13CDNA73 AANAT ABAT ABCB1 ACACA ACAD8 ACTL7B ACTN1 ACTR8 ADAM30 ADAMDEC1 ADAMTS6 ADARB2 ADCY2 ADH1A ADK AFM AGTR1 AKAP4 AKR1B1 ALDH1A2 ALDH8A1 ALDOB AMFR ANK1 ANKHD1 ANP32B AP3S2 APBB3 APOH ARF5 ARF6 ARG2 ARGBP2 ARHGAP19 ARMCX2 ARNT2 ARSD ASPH ASTN ATP2A3 ATP2B4 ATP5C1 ATP6V0E ATP6V1D ATP8A2 ATRN B4GALT5 BAI2 BATF BBS4 BBS7 BCAP29 BCL2 BICD2 BIRC2 BMP4 BMX BPI BRD1 BTG3 BTN2A2 C10orf76 C14orf1 C1…
81	V$E2F_Q4: E2F	559	559	617	7466	8678	-2.92	0	1.59	0.33	ABLIM3 ACACA ACAD8 ACO2 ADAM22 ADAMTS6 ADARB2 ADCY2 ADD3 ADK ADORA2B AFM AKAP12 AKR1B1 ALDH1A2 ALDH3A2 ALDH8A1 ALG8 ALPP AMFR ANK1 ANKHD1 ANKRD25 AP2B1 AP3S2 APLP2 ARF5 ARF6 ARFRP2 ARG2 ARGBP2 ARHGEF2 ASTN ATP2A3 ATP2B2 ATP2B4 ATP5C1 ATP5E ATP6V0E ATP6V1D ATP8A2 ATR B4GALT5 B4GALT6 BATF BIRC2 BMP4 BMX BPESC1 BRD1 BTG3 C10orf76 C16orf33 C1QDC1 C1orf41 C20orf111 C20orf18 C20orf67 C22orf3 C3orf14 C4…
82	V$PITX2_Q2: pituitary homeobox factor 2	604	604	572	8496	7648	-2.93	0	0.21	0.07	13CDNA73 AANAT ABAT ACACA ACAD8 ACTL7B ACTR8 ACYP2 ADAMDEC1 ADD3 ADK AFM AGTR1 AKR1C4 ALDH1A2 ALDH3A2 ALDH8A1 ALDOC ALG8 ALMS1 ANKRD25 ANP32B AP2B1 AP3S1 AP3S2 APOH ARF3 ARF5 ARFRP2 ARG2 ARGBP2 ARHGAP19 ARMCX2 ARSD ATF5 ATP2B1 ATP2B4 ATP5C1 ATP6V0E ATP6V1D ATP8A2 ATR ATRN AVPR1A B3GALT2 B4GALT5 B4GALT6 BCAP29 BCL2 BGR BMP4 BRAP BTN2A2 BZRP C10orf76 C11orf9 C14orf1 C14orf114 C16orf33 C17orf25 C18o…
83	V$FREAC7_01: Fork head RElated ACtivator-7	417	417	759	5517	10627	-2.93	0	1.64	0.33	13CDNA73 ABAT ABCB1 ABCE1 ABLIM3 ACACA ACAD8 ACCN1 ACYP2 ADAM22 ADAMDEC1 ADAMTS6 ADH1A AFM AGTR1 AKR1B1 AKR1C4 ALDH1A2 ALDOB ALG8 ALMS1 APOH ARF5 ARHGAP19 ARMCX2 ARSD ASPH ASTN ATP2B1 ATP2B4 ATP6V0E AVPR1A B3GALT2 B4GALT5 BAI3 BBS4 BBS7 BMX BPI BRAP C10orf76 C14orf114 C18orf1 C20orf18 C20orf19 C21orf62 C5orf4 C6orf109 C9orf36 CA1 CA11 CACNG3 CALM1 CALM3 CAMK1G CASP4 CAST CCL20 CD1B CD200 CD40 CD4…
84	V$VMW65_Q6	414	414	762	5892	10252	-2.93	0	0.2	0.06	13CDNA73 AANAT ABAT ABCB1 ACACA ACO2 ACTN1 ADAM22 ADAMTS6 ADARB2 ADH1A AFM AGTR1 AKAP12 AKR1B1 AKR1C4 ALDOB ALG8 ALMS1 ALPP APBB3 APOH ARGBP2 ARSD ASPH ATP2B1 ATP2B4 ATP5E ATP6V0E ATP6V1D ATRN AVPR1A B3GALT2 B4GALT5 BAI3 BCL2 BICD2 BIRC2 BMP4 BMX C14orf114 C17orf25 C1S C1orf21 C1orf41 C21orf2 C21orf62 C3orf14 C4orf8 C5orf4 C6orf162 C6orf210 C6orf32 C7orf28A C9orf36 CADPS2 CALM1 CALM3 CAMK1G CAMKK…
85	V$ZTA_Q2	353	353	823	5054	11090	-2.94	0	0.19	0.06	ABAT ABLIM3 ACACA ADAM18 ADAM30 ADAMDEC1 ADAMTS6 ADARB2 ADCY2 ADD3 AGTR1 AKR1C4 ALDH8A1 ALDOC ANK1 APOH ARF3 ARF5 ARG2 ARGBP2 ARHGAP19 ARSD ASPH ATP5C1 ATP6V0E ATP8A2 ATRN B4GALT5 BAI3 BRAP BRD1 BZRAP1 BZRP C10orf76 C18orf1 C1QDC1 C1S C20orf111 C3orf14 C4orf8 C5orf4 C6orf145 C6orf32 CA1 CADPS2 CALM1 CAMK1G CAMKK2 CAMP CAST CD200 CD40 CD44 CD68 CDH10 CDK7 CDKN2D CENTG1 CGGBP1 CHKB CLDN10 CLIPR-59 …
86	V$ER_Q6: estrogen receptor	590	590	586	8295	7849	-2.96	0	0.23	0.07	13CDNA73 ABAT ABCB1 ABLIM3 ACACA ACAD8 ACCN1 ACSL6 ACTL7B ACTR8 ADAM30 ADARB2 ADCY2 ADK AFM AGXT AKAP12 AKAP4 AKR1C4 ALDH1A2 ALDH8A1 ALMS1 ALPP AMFR ANKHD1 ANKRD25 AP3S2 APBB3 APOH ARF6 ARFRP2 ARG2 ARHGAP19 ARHGEF2 ARSD ASTN ATP11A ATP2A3 ATP2B2 ATP2B4 ATP5C1 ATP5H ATP6V0E ATP6V1D ATP8A2 ATR B4GALT5 BATF BBS4 BGR BMX BPESC1 BPI BRAP BRD1 BTN2A2 BZRAP1 C11orf9 C14orf1 C14orf114 C1QDC1 C1S C20orf18…
87	V$MTATA_B: Muscle TATA box	531	531	645	7092	9052	-2.96	0	1.53	0.33	ABAT ABLIM3 ACACA ACAD8 ACCN1 ACO2 ACTR8 ACYP2 ADAM18 ADAM22 ADAMTS6 ADARB2 ADD3 ADK AFM AGTR1 AGXT AKAP12 AKAP4 AKR1B1 AKR1C4 ALDH1A2 ALDH8A1 ALDOB ALG8 ALMS1 ALPP AP3S1 AP3S2 APBB3 APLP2 APOH ARFRP2 ARG2 ARGBP2 ARHGEF2 ASPH ATP2B4 ATP5C1 ATP5E AVPR1A B3GALT2 B4GALT5 BATF BBS7 BCAP29 BMP4 BMX BPESC1 BPI BZRP C14orf114 C18orf1 C1S C20orf19 C21orf2 C21orf62 C22orf3 C3orf14 C4orf8 C5orf4 C6orf109 C…
88	V$HNF4_DR1_Q3	920	920	256	12424	3720	-2.97	0	1.79	0.33	13CDNA73 AANAT ABAT ABCB1 ABCE1 ABLIM3 ACACA ACAD8 ACO2 ACSL6 ACTL7B ACTN1 ACTR8 ACYP2 ADAM18 ADAM22 ADAM30 ADAMDEC1 ADAMTS6 ADCY2 ADD3 ADH1A ADK ADORA2B AFM AGTR1 AKAP12 AKAP4 AKR1B1 AKR1C4 ALDH1A2 ALDH8A1 ALDOB ALDOC ALG8 ALPP AMFR ANK1 ANKHD1 AP2B1 AP3S1 AP3S2 APOH ARF3 ARF5 ARF6 ARFRP2 ARG2 ARGBP2 ARHGAP19 ARHGEF2 ARSD ASPH ASTN ATF5 ATP11A ATP2A3 ATP2B1 ATP2B2 ATP2B4 ATP5C1 ATP5E ATP5H ATP6V…
89	V$NMYC_01: N-Myc	310	310	866	4057	12087	-2.97	0	1.7	0.33	ACO2 ACSL6 ADAM30 ADAMTS6 ADK ADORA2B AKAP12 AKR1B1 ALDH3A2 ALDOC ALPP AMFR ANP32B APBB3 ARF5 ARF6 ARFRP2 ARMCX2 ASPH ATP6V0E B3GALT2 BAI2 BCL11B BHLHB2 BICD2 BMP4 BPESC1 BRD1 C18orf1 C20orf111 C20orf19 C22orf3 C4orf9 C5orf4 C6orf162 C6orf210 C7orf28A C9orf36 CACNG3 CADPS2 CALM1 CAST CCDC6 CDC34 CDK5R1 CDK7 CDKN2D CENPE CGI-12 CGI-30 CHAF1A CLCN3 CLCNKB CLDN10 CLIPR-59 CNDP2 CNNM1 COLQ COMT COX7C…
90	V$CREB_Q2_01	456	456	720	6071	10073	-2.99	0	1.51	0.33	AANAT ABCE1 ACCN1 ACO2 ACSL6 ACTL7B ACTN1 ACTR8 ADAM22 ADAM30 ADAMTS6 ADCY2 ADK ALDH8A1 ANK1 ANKHD1 ANP32B AP2B1 APOH ARF5 ARF6 ARG2 ARGBP2 ARMCX2 ARNT2 ATP11A ATP2B2 ATP6V1D ATR ATRN B3GALT2 B4GALT6 BAHD1 BBS7 BCAP29 BCL11A BCL11B BGR BICD2 BIRC2 BMX BPESC1 BRD1 BTG3 BZRP C11orf9 C14orf1 C16orf33 C17orf25 C18orf1 C1orf21 C20orf111 C20orf67 C21orf2 C3orf14 C4orf8 C6orf106 C9orf36 CABP1 CAP350 CAP…
91	V$EFC_Q6	642	642	534	8627	7517	-2.99	0	1.47	0.32	13CDNA73 ABAT ABCB1 ABCE1 ACACA ACCN1 ACO2 ACSL6 ACTL7B ACTN1 ADAM30 ADAMDEC1 ADAMTS6 ADARB2 ADD3 ADK ADORA2B AFM AGTR1 AGXT AKAP4 AKR1B1 ALDH1A2 ALDH8A1 ALDOB ALMS1 AMFR ANP32B AP2B1 AP3S1 AP3S2 APOH ARF3 ARF5 ARF6 ARFRP2 ARG2 ARGBP2 ARHGAP19 ARHGEF2 ARSD ASPH ASTN ATP2B1 ATP6V0E ATP6V1D ATP8A2 ATR ATRN AVPR1A B3GALT2 B4GALT6 BBS4 BCAP29 BCL2 BGR BICD2 BMX BPESC1 BPI BTN2A2 BZRAP1 BZRP C14orf1 C…
92	V$E2F1_Q4_01	366	366	810	4831	11313	-2.99	0	1.6	0.33	ABLIM3 ACACA ACCN1 ACSL6 ADARB2 ADD3 ADK AFM AKAP12 AKR1B1 ALDH1A2 ALG8 AMFR ANKHD1 ANP32B AP2B1 AP3S2 APLP2 ARF5 ARF6 ARFRP2 ARG2 ARGBP2 ARHGAP19 ARHGEF2 ATP2A3 ATP2B2 ATP2B4 ATP5C1 ATP6V0E ATP6V1D ATP8A2 ATRN B4GALT5 B4GALT6 BCL11A BIRC2 BMX BRD1 BTG3 C16orf33 C1orf41 C20orf111 C3orf14 C4orf9 C6orf145 C7orf28A CA1 CALM3 CAMKK2 CASK CASP8AP2 CCL22 CD44 CD79B CDC14B CDC2L6 CDC34 CDC42EP4 CDH10 CD…
93	V$HFH1_01: HNF-3/Fkh Homolog 1	137	137	1039	1697	14447	-2.99	0	2.11	0.33	13CDNA73 ABLIM3 ACACA ACCN1 ACYP2 ADAMTS6 AGTR1 ARGBP2 ARMCX2 ATP2B1 ATP2B4 AVPR1A BBS7 BIRC2 C14orf114 C4orf8 C5orf4 CASP4 CAST CD1B CD200 CDH10 CENPE CHD3 CLIC5 CLN8 COL5A2 CRYZ CSGlcA-T CTAGE5 CYP26B1 CYP3A4 CYP3A7 Cep192 DET1 DHFR DHRS9 DMD EDF1 EVI1 F9 FCAR FDFT1 FLJ13197 FLJ20618 FOXO3A FRAT1 FRG1 GBA GDAP1L1 GIT2 GLRA3 GLUD2 GLUL GNAS GPM6A GTSE1 H2AFX HLA-DPA1 HLA-E HPCA HS322B1A HTN3 ING…
94	V$CREB_Q4_01	433	433	743	5757	10387	-3	0	1.51	0.33	AANAT ABCE1 ACCN1 ACO2 ACSL6 ACTL7B ACTN1 ADAM22 ADAM30 ADAMTS6 ADARB2 ADK AKAP12 ANK1 ANKHD1 ANP32B AP2B1 AP3S2 APOH ARF5 ARF6 ARG2 ARMCX2 ARNT2 ATP11A ATP2B2 ATR ATRN B3GALT2 B4GALT6 BAHD1 BBS7 BCAP29 BCL11A BCL11B BGR BICD2 BIRC2 BPESC1 BRD1 BTG3 C11orf9 C14orf1 C16orf33 C17orf25 C18orf1 C1orf21 C20orf111 C20orf67 C21orf2 C3orf14 C4orf8 C6orf106 C6orf62 C9orf36 CABP1 CAP350 CAPZA1 CASK CASP4 C…
95	V$MEF2_Q6_01	725	725	451	9766	6378	-3.01	0	1.49	0.33	13CDNA73 ABAT ABCB1 ABCE1 ACACA ACAD8 ACCN1 ACSL6 ACTL7B ACYP2 ADAM18 ADAM22 ADAM30 ADAMTS6 ADARB2 ADD3 ADH1A ADK AFM AGTR1 AGXT AKAP12 AKAP4 AKR1B1 AKR1C4 ALDH1A2 ALDOB ALDOC ALG8 ANK1 ANKRD25 ANP32B AP2B1 AP3S1 AP3S2 APBB3 APLP2 APOH ARF3 ARF5 ARF6 ARFRP2 ARG2 ARGBP2 ARHGAP19 ARMCX2 ARSD ASPH ASTN ATF5 ATP2A3 ATP2B1 ATP2B4 ATP5E ATP6V0E ATP8A2 ATRN AVPR1A B3GALT2 B4GALT5 BAI3 BBS4 BBS7 BCAP29 B…
96	V$OCT1_02: octamer factor 1	314	314	862	4501	11643	-3.02	0	0.2	0.06	AANAT ACYP2 ADAM18 ADAMDEC1 ADD3 ADH1A ADK AFM AGTR1 AKR1C4 ALDH8A1 ALDOC ARF3 ARG2 ARGBP2 ASPH ASTN ATP2B1 ATP6V1D ATP8A2 B3GALT2 BAI2 BAI3 BCL11A BIRC2 BMX BPI BRAP C18orf1 C1orf21 C3orf14 C4orf8 C6orf162 C6orf62 C9orf36 CACNG3 CALM1 CAMKK2 CASP5 CAST CD1B CDH10 CEPT1 CFHL2 CFLAR CGA CHD2 CLCN3 CLDN10 CNOT6 COAS2 COL21A1 COL5A2 COX6B1 COX7C CPT2 CR1 CRYM CSF2RA CSF2RB CSGlcA-T CSNK2A2 CTAG1B CT…
97	V$NKX25_02: homeo domain factor Nkx-2.5/Csx, tinman homolog	468	468	708	6245	9899	-3.02	0	1.45	0.32	ABAT ABCB1 ABLIM3 ACACA ACAD8 ADAMDEC1 ADARB2 ADD3 ADK AFM AGXT AKAP4 AKR1B1 AKR1C4 ALDH1A2 ALDH3A2 ALDH8A1 ALDOB ALG8 ALMS1 ALPP AP2B1 AP3S1 AP3S2 APBB3 APLP2 ARF5 ARF6 ARFRP2 ARGBP2 ARHGAP19 ATP11A ATP5C1 ATP5E ATP6V1D ATRN AVPR1A B3GALT2 BAHD1 BAI3 BATF BBS7 BCAP29 BCL2 BIRC2 BMX BRAP C18orf1 C1QDC1 C1S C1orf21 C20orf111 C20orf19 C21orf2 C22orf3 C5orf4 C6orf109 C6orf162 C6orf32 C6orf62 C7orf28…
98	V$DEC_Q1	878	878	298	11865	4279	-3.03	0	1.61	0.33	13CDNA73 AANAT ABAT ABCB1 ABCE1 ABLIM3 ACACA ACAD8 ACO2 ACTL7B ACTN1 ACTR8 ACYP2 ADAM22 ADAM30 ADAMTS6 ADARB2 ADD3 ADH1A ADK AFM AGTR1 AGXT AKAP12 AKAP4 AKR1B1 AKR1C4 ALDH1A2 ALDH3A2 ALDH8A1 ALG8 ALPP AMFR ANK1 ANKHD1 ANKRD25 ANP32B AP2B1 AP3S2 APBB3 APOH ARF5 ARF6 ARFRP2 ARG2 ARGBP2 ARHGAP19 ARMCX2 ARNT2 ARSD ASPH ASTN ATP11A ATP2B1 ATP2B2 ATP2B4 ATP5C1 ATP5E ATP6V0E ATP6V1D ATP8A2 ATRN B3GALT2 …
99	V$FOXP3_Q4	586	586	590	8216	7928	-3.03	0	0.26	0.07	13CDNA73 ABCB1 ABCE1 ACAD8 ACO2 ACTL7B ACYP2 ADAM18 ADAM22 ADAMDEC1 ADARB2 ADD3 ADK AGTR1 AGXT AKAP12 AKAP4 AKR1C4 ALDH1A2 ALDH8A1 ALDOB ALDOC ANK1 ANP32B AP2B1 AP3S2 APOH ARF6 ARG2 ARGBP2 ARHGAP19 ARMCX2 ARNT2 ARSD ASPH ASTN ATF5 ATP2A3 ATP2B1 ATP5C1 ATP5E ATP5H ATP6V0E ATP6V1D ATP8A2 AVPR1A B3GALT2 B4GALT5 BAI3 BBS4 BCAP29 BCL11B BCL2 BICD2 BIRC2 BMX BPESC1 BRD1 BTG3 BZRAP1 BZRP C10orf76 C11orf…
100	V$ZID_01: zinc finger with interaction domain	206	206	970	2643	13501	-3.04	0	1.81	0.33	ADK AKAP12 AKR1B1 ALMS1 ALPP ANKHD1 ANKRD25 ARF6 ATP2A3 ATP2B2 ATP5H BBS7 BCL2 BZRAP1 C17orf25 C20orf111 C20orf18 C21orf62 C6orf106 CACNG3 CASP8AP2 CAST CCL20 CD68 CDC34 CENPE CHD2 CHKB CHRNA1 CLIPR-59 CMKLR1 CNOT1 COBLL1 COLQ CPT2 CSF1 CSF2 CSH2 CTBP2 CTPS2 DALRD3 DAPK3 DELGEF DHRS9 DKFZP564J0123 DLX2 DMD DMN DSP EFHC2 EIF3S12 ERF ESRRA EVI1 FBXW7 FCGR2C FDFT1 FETUB FKBP3 FLJ10521 FLJ13154 FLJ13…
101	V$RORA1_01: RAR-related orphan receptor alpha1	107	107	1069	1298	14846	-3.04	0	2.2	0.33	ABAT AGXT APBB3 ATP2B4 B4GALT5 BATF BRAP BTN2A2 CAST CDK5R1 CGI-30 CMKLR1 CNOT6 COAS2 COBLL1 COLQ CRYM CSF2RA CSPG3 CYP3A7 DAZAP2 DDX1 DDX52 DHRS9 DHX32 DKFZP586M1120 DLGAP4 DUSP10 ENSA ESRRA FLJ10847 FOXO1A GCLC GPM6A GSTA3 HLA-DQB2 HRMT1L1 ICA1 ICAM4 IGSF6 IL9R ITGB4 JMJD2B KDELR3 KIAA0992 LDHA LTF MAB21L1 MASP1 MGC2749 MKL2 MT1X NCAM1 NDUFB8 NETO2 NPAS2 NUCKS NUP214 OSBPL10 OTUB2 PCDHGA10 PDCD…
102	V$GATA_C: GATA binding site	501	501	675	6714	9430	-3.06	0	1.36	0.31	13CDNA73 ABCB1 ABCE1 ACACA ACCN1 ACTR8 ACYP2 ADAM30 ADAMDEC1 ADAMTS6 ADARB2 ADD3 ADH1A ADORA2B AGTR1 AGXT AKR1B1 AKR1C4 ALDH1A2 ALDH8A1 ALDOB ALDOC ALG8 ANK1 ANKRD25 AP2B1 APOH ARFRP2 ARGBP2 ARHGAP19 ARMCX2 ARNT2 ARSD ASPH ASTN ATP2A3 ATP2B1 ATP2B2 ATP5C1 ATP5E ATP5H ATP6V0E ATP8A2 B4GALT5 BAHD1 BAI3 BATF BBS4 BBS7 BICD2 BMP4 BMX BPESC1 BPI BRAP BTN2A2 BZRAP1 C11orf9 C17orf25 C1QDC1 C1S C20orf111…
103	V$EBF_Q6	400	400	776	5323	10821	-3.07	0	1.42	0.32	AANAT ABAT ACACA ACO2 ACTL7B ACTN1 ADD3 ADH1A AGTR1 AKAP12 ALDH3A2 ALPP ANK1 ANKRD25 AP3S1 APBB3 ARF5 ARGBP2 ATP11A ATP2A3 ATP5C1 ATP5H ATP6V1D ATR B3GALT2 BATF BBS4 BHLHB2 BICD2 BIRC2 BMP4 BRD1 BZRAP1 C14orf1 C18orf1 C1S C1orf41 C20orf67 C22orf3 C3orf14 C4orf9 C6orf109 C6orf32 C6orf62 C7orf28A CA11 CADPS2 CALM3 CAMKK2 CAMP CASP4 CASP9 CAST CCL22 CD200 CD40 CD68 CD79B CDC34 CDC42EP4 CDH1 CDK5R1 C…
104	V$GCM_Q2	268	268	908	3861	12283	-3.07	0	0.2	0.06	ABLIM3 ACACA ACCN1 ACTN1 ACTR8 ADAMTS6 ADD3 ADK ALDH3A2 ALDH8A1 ALDOC ALG8 ANKHD1 APBB3 ARF5 ARHGAP19 ARMCX2 ATP2B4 ATP5C1 ATP5H B3GALT2 B4GALT5 BAHD1 BCL2 BMP4 BMX BZRAP1 BZRP C18orf1 C1orf41 C20orf111 C21orf2 C3orf14 C6orf62 C9orf36 CA11 CASK CASP9 CAST CDC14B CDC42EP4 CDIPT CEPT1 CHKB CHRNA1 CHRNB3 CLDN10 CLEC7A CNDP2 COL21A1 COL4A1 COL5A2 COLQ COPZ2 COX4I1 CSE1L CSF2RB CSGlcA-T CSH2 CTBP2 CUT…
105	V$HLF_01: hepatic leukemia factor	335	335	841	4424	11720	-3.07	0	1.51	0.33	ABAT ABCE1 ACACA ADAM22 ADK AGTR1 AGXT AKAP12 AKR1C4 ALDH1A2 ALDH8A1 ALDOB ALDOC ALG8 ALPP APOH ARF6 ARFRP2 ARGBP2 ARMCX2 ASPH ATP2B1 ATP2B4 ATP5E ATP5H ATP6V0E AVPR1A B3GALT2 BAI3 BCL2 BHLHB2 BMX C10orf76 C14orf114 C16orf33 C1QDC1 C1S C20orf111 C20orf18 C21orf2 C21orf62 C6orf106 C7orf28A CALM1 CAMKK2 CASP4 CAST CCDC6 CCL20 CD1B CD200 CENPE CEPT1 CFHL2 CGI-30 CHAF1A CHD2 CHKB CHRNA1 CLDN10 CLEC7A…
106	V$AREB6_03: AREB6 (Atp1a1 regulatory element binding factor 6)	278	278	898	3641	12503	-3.08	0	1.59	0.33	AANAT ACCN1 ACSL6 ACTL7B ACTR8 ADAM22 ADD3 ADK AKAP12 ALDH1A2 ALPP AP3S2 ARF3 ARSD ASPH ATP2B2 ATP6V0E ATP8A2 BAI2 BATF BBS4 BGR BPESC1 C10orf76 C17orf25 C20orf19 C5orf4 C6orf162 C6orf32 CAMP CASP9 CCL22 CD40 CD79B CDC14B CDC34 CDH1 CDIPT CESK1 CFLAR CGA CHRDL1 CLCNKB CLST11240 CNAP1 CNDP2 CNNM1 CNOT1 CNR1 COAS2 COBLL1 COMT COPZ2 CR1 CSF1 CSF2 CSPG3 CTAG1B CUTL1 DALRD3 DAZAP2 DDAH2 DELGEF DHFR DH…
107	V$MYOGNF1_01: myogenin / nuclear factor 1 or related factors	264	264	912	3803	12341	-3.08	0	0.2	0.06	AANAT ABAT ABCB1 ABCE1 ACCN1 ACTL7B ADAM22 ADAMTS6 AGTR1 AKAP12 ALDOC ANK1 ANP32B AP3S2 APOH ARF3 ARF5 ARF6 ARHGAP19 ASPH ATP2B4 ATP5C1 ATP6V1D BAI2 BATF BICD2 BIRC2 BPI BRD1 C10orf76 C17orf25 C18orf1 C20orf111 C20orf18 C21orf2 C4orf8 C4orf9 CAMK1G CAMP CAPZA1 CASP9 CCIN CCL22 CD79B CDC27 CDIPT CDK5R1 CDKN2D CHD3 CLCNKB CLDN10 CLEC7A CMKLR1 CNNM1 CNOT6 COL21A1 COL8A2 COLQ COPZ2 COX7C CR1 CSF2 CSH…
108	V$HNF3ALPHA_Q6	901	901	275	12191	3953	-3.08	0	1.57	0.33	13CDNA73 AANAT ABAT ABCB1 ABCE1 ABLIM3 ACACA ACAD8 ACCN1 ACTL7B ACYP2 ADAM18 ADAM22 ADAM30 ADAMDEC1 ADAMTS6 ADARB2 ADD3 ADH1A ADK ADORA2B AFM AGTR1 AGXT AKAP12 AKAP4 AKR1C4 ALDH1A2 ALDH3A2 ALDH8A1 ALDOB ALG8 ALMS1 ALPP AMFR ANK1 ANKRD25 ANP32B AP2B1 AP3S1 AP3S2 APBB3 APLP2 APOH ARF3 ARF6 ARG2 ARGBP2 ARHGAP19 ARMCX2 ARNT2 ARSD ASPH ASTN ATF5 ATP11A ATP2A3 ATP2B1 ATP2B4 ATP5C1 ATP5E ATR AVPR1A B3GA…
109	V$GATA1_03: GATA-binding factor 1	579	579	597	7796	8348	-3.09	0	1.29	0.31	AANAT ABAT ABCB1 ABCE1 ACACA ACAD8 ACTL7B ACTN1 ACYP2 ADAM18 ADARB2 ADD3 AFM AGTR1 AKR1B1 AKR1C4 ALDH1A2 ALDH3A2 ALDH8A1 ALG8 AMFR ANK1 ANKHD1 ANKRD25 AP2B1 AP3S1 AP3S2 APOH ARF3 ARGBP2 ARHGAP19 ASPH ATF5 ATP2B1 ATP6V0E ATP8A2 ATRN B3GALT2 B4GALT6 BATF BBS4 BCAP29 BCL2 BGR BMP4 BMX BPESC1 BRAP BTN2A2 BZRP C10orf76 C14orf114 C16orf33 C17orf25 C18orf1 C1QDC1 C1orf21 C20orf19 C21orf62 C22orf3 C4orf8…
110	V$IPF1_Q4	230	230	946	2980	13164	-3.09	0	1.69	0.33	ABAT ABCB1 ACTR8 ADAM18 ADAMTS6 ADARB2 ADH1A AGTR1 AKAP12 AKAP4 ALDOC AP3S2 APOH ARG2 ARNT2 ASPH AVPR1A B3GALT2 B4GALT6 BBS4 BIRC2 BMP4 BMX BPI C16orf33 C17orf25 C18orf1 C6orf162 C6orf32 CADPS2 CAMK1G CASK CASP5 CAST CCL20 CCND3 CD200 CD68 CDK7 CEPT1 CHAF1A CLCN3 CLEC7A CLST11240 COAS2 COL5A2 COLQ COX6A1 COX7C CPT2 CRP CTAGE5 CTTN CYP3A4 CYP3A7 DHRS9 DHX9 DIO2 DLG5 DMD DNTT DUSP6 EFS EIF4E2 ELK3 …
111	V$FOXJ2_01: fork head box J 2	486	486	690	6517	9627	-3.09	0	1.31	0.31	13CDNA73 ABAT ABCB1 ABCE1 ABLIM3 ACACA ACAD8 ACCN1 ADAM22 ADAM30 ADAMTS6 ADH1A ADK AFM AGTR1 AKAP12 AKR1C4 ALDOB ALG8 ALPP ARF3 ARF5 ARF6 ARHGAP19 ARMCX2 ARSD ASTN ATF5 ATP11A ATP2B1 ATP2B4 ATP6V0E AVPR1A B3GALT2 BAI2 BAI3 BATF BBS4 BBS7 BCAP29 BCL11B BGR BIRC2 BMX BPI BRAP BRD1 BZRAP1 BZRP C14orf1 C14orf114 C16orf33 C17orf25 C18orf1 C1S C20orf111 C20orf18 C20orf19 C21orf62 C5orf4 C6orf106 C7orf2…
112	V$ATF_01: activating transcription factor	151	151	1025	1899	14245	-3.09	0	1.93	0.33	AANAT ABCE1 ACCN1 ADAMTS6 ADK ANK1 ANP32B AP2B1 ARF5 ARG2 ARMCX2 ARNT2 ATP11A ATRN B3GALT2 BBS7 BIRC2 BRD1 C11orf9 C17orf25 C18orf1 C20orf111 C20orf67 C3orf14 C4orf8 C6orf106 CAPZA1 CASP8AP2 CASP9 CDC14B CDC42EP4 CENPE CGA CLCN3 CNDP2 COPZ2 CTAGE5 CTBP1 D2LIC DKFZP434A0131 DLGAP2 DLX2 DNAJA4 ENSA EPHA2 ERF FADS1 FAF1 FAM50A FLJ10618 FLJ38984 FLNC FN1 FRAT1 GABBR1 GALNT10 GOT2 HIST2H4 HMGCR HNRPA3…
113	V$HNF6_Q6	94	94	1082	1462	14682	-3.1	0	0.1	0.04	13CDNA73 ACACA ADH1A AGTR1 APOH ARGBP2 ASTN ATP6V0E ATR BMX C14orf114 C6orf62 CA1 CASP4 CASP9 CCL20 CD68 CDC2L6 CGI-12 CHRNB3 CLST11240 CPNE3 CRP DLGAP2 DLX2 DMD FAM50A FBXW7 FLJ10847 FLJ12606 FLJ13197 FLJ20618 FOLH1 FYCO1 GCH1 HBB HLA-DPB1 HP HTN3 IL15 IL24 KCNAB1 KIAA0774 KIF2 KLRA1 LSM5 MKKS MTSS1 MYO5C NRIP2 NRXN1 NUCKS P2RY10 PAPSS1 PBOV1 PCDH11X PDE4D PEG3 PFDN1 PHF20L1 PIK3R1 PPP1R3A PPP2R…
114	V$NRF2_Q4: heterodimer containing Nrf2	304	304	872	4005	12139	-3.11	0	1.51	0.33	AANAT ABAT ABCB1 ABLIM3 ACO2 ADAM30 ADD3 ADH1A AGTR1 AKAP4 ALDH3A2 ALMS1 AMFR ANK1 ANKHD1 APOH ARFRP2 ARG2 ARGBP2 ARHGAP19 ARSD ASTN B3GALT2 B4GALT5 BAHD1 BBS7 BGR BMP4 C10orf76 C11orf9 C14orf114 C18orf1 C1QDC1 C1S C1orf21 C20orf111 C22orf3 C5orf4 C6orf145 C6orf32 C6orf62 CAMKK2 CAST CCND3 CD44 CD68 CDC27 CDH1 CDK7 CENPE CENTG1 CHRNA9 CLCNKB CLDN10 CLEC7A CLIC5 CNOT6 COAS2 COG2 COPZ2 COX6A1 CSF1 …
115	V$MYCMAX_B: c-Myc:Max binding sites	592	592	584	7980	8164	-3.11	0	1.26	0.31	ABAT ABCE1 ABLIM3 ACACA ACCN1 ACO2 ACTN1 ACYP2 ADAM30 ADAMTS6 ADARB2 ADCY2 ADK ADORA2B AFM AKAP12 AKR1B1 AKR1C4 ALDH1A2 ALDH3A2 ALDOC ALPP AMFR ANKHD1 ANP32B AP2B1 APBB3 APLP2 ARF3 ARF5 ARF6 ARFRP2 ARNT2 ARSD ASPH ATP11A ATP2A3 ATP6V0E ATP6V1D ATP8A2 ATRN B3GALT2 B4GALT5 B4GALT6 BAHD1 BAI2 BCL11A BHLHB2 BICD2 BMP4 BMX BPESC1 BRD1 BTG3 BZRP C17orf25 C18orf1 C1QDC1 C1orf21 C1orf41 C20orf19 C20orf67…
116	V$PAX6_01: Pax-6	552	552	624	7435	8709	-3.11	0	1.24	0.31	13CDNA73 ABCB1 ABCE1 ACACA ACO2 ACTL7B ACTN1 ACTR8 ACYP2 ADAM18 ADAM30 ADAMTS6 ADARB2 ADCY2 ADD3 ADH1A ADORA2B AFM AGTR1 AGXT AKAP12 ALDH1A2 ALDH3A2 ALDH8A1 ALDOB ALG8 ALMS1 ANK1 AP2B1 AP3S1 APBB3 ARF3 ARF5 ARF6 ARG2 ARGBP2 ARMCX2 ARSD ASPH ASTN ATP2B1 ATP2B4 ATR B3GALT2 BAHD1 BBS4 BBS7 BCL11B BCL2 BGR BHLHB2 BICD2 BIRC2 BMX BRAP BTN2A2 C14orf114 C16orf33 C18orf1 C1QDC1 C1S C21orf62 C4orf8 C5orf4…
117	V$PAX9_B: zebrafish Pax-9 binding sites	325	325	851	4625	11519	-3.12	0	0.25	0.07	13CDNA73 ABAT ABLIM3 ACACA ACCN1 ACO2 ACTR8 ADCY2 ADD3 ADK AKR1B1 ALDOC ANKRD25 AP3S2 APLP2 APOH ARG2 ARGBP2 ARMCX2 ARSD B4GALT6 BAHD1 BATF BCL11A BCL2 BICD2 BIRC2 BMP4 BRD1 BTG3 C14orf1 C18orf1 C1S C20orf111 C20orf19 C20orf67 C22orf3 C6orf106 C6orf210 C6orf32 CA11 CABP1 CALM1 CALM3 CAMKK2 CAST CCDC6 CCIN CD40 CD79B CDC14B CDC42EP4 CDK5R1 CESK1 CFLAR CHD2 CHD3 CLCNKB CLEC7A CLIPR-59 CNDP2 CNNM1 C…
118	V$GATA1_06: GATA-binding factor 1	312	312	864	4127	12017	-3.14	0	1.42	0.32	ABCB1 ABCE1 ACACA ACTR8 ACYP2 ADAM22 ADAMDEC1 ADD3 AGTR1 AGXT AKAP4 ALDH1A2 ALDH8A1 ALDOB ALG8 AP2B1 APOH ARF6 ARFRP2 ARGBP2 ARHGAP19 ARSD ASPH ASTN ATP2A3 ATP2B1 ATP5H B4GALT5 BAHD1 BATF BBS7 BMP4 BMX BPI BRAP C11orf9 C20orf67 C21orf2 C21orf62 C6orf106 C6orf162 C6orf210 C6orf32 C9orf36 CACNG3 CADPS2 CAMK1G CAMKK2 CAMP CAP350 CASP5 CAST CCIN CD1B CDC14B CDC27 CDH10 CDIPT CDK7 CENPE CGA CHD3 CLDN1…
119	V$IRF_Q6_01	561	561	615	7571	8573	-3.14	0	1.18	0.3	13CDNA73 ABAT ABCB1 ACCN1 ACTN1 ADAM18 ADAM30 ADAMDEC1 ADAMTS6 ADARB2 ADH1A ADK AFM AGTR1 AKAP12 AKAP4 AKR1C4 ALDOB ALDOC ALG8 ANK1 ANKRD25 APOH ARF6 ARFRP2 ARGBP2 ARHGAP19 ARHGEF2 ARSD ASPH ASTN ATF5 ATP2B4 ATP5C1 ATP5E ATP6V1D ATP8A2 AVPR1A BAI3 BATF BCAP29 BCL11A BCL2 BGR BIRC2 BMP4 BMX BPESC1 BTG3 BTN2A2 BZRP C10orf76 C14orf114 C18orf1 C1S C1orf21 C20orf18 C20orf19 C21orf2 C3orf14 C4orf8 C5or…
120	V$HP1SITEFACTOR_Q6	265	265	911	3474	12670	-3.14	0	1.53	0.33	ABLIM3 ACACA ACYP2 ADAM18 ADCY2 ADH1A ADORA2B AFM AGXT AKR1B1 AKR1C4 ALDH8A1 ALG8 ANK1 ANKHD1 AP3S2 ARG2 ARGBP2 ASPH ATP2B1 ATP5C1 ATP8A2 ATR B3GALT2 BAHD1 BAI3 BBS4 BCAP29 BCL11B BTG3 C17orf25 C20orf111 C20orf19 CASP4 CASP5 CAST CCDC6 CCND3 CD44 CDC14B CDC27 CDC42EP4 CENPE CENTG1 CESK1 CFHL2 CFLAR CHD2 CHD3 CHRNA1 CLIPR-59 CLST11240 CNOT6 COAS2 COG2 COL5A2 COLQ COX7C CSF2RA CSH2 CTAGE5 DAZAP2 DC…
121	V$MYCMAX_02: c-Myc:Max heterodimer	378	378	798	5043	11101	-3.15	0	1.31	0.31	AANAT ACACA ACCN1 ACO2 ADAM30 ADAMTS6 ADARB2 ADD3 ADK ADORA2B AFM AGTR1 AKAP12 ALDH3A2 ALDH8A1 ALDOB ALDOC ALPP AMFR ANKRD25 ANP32B AP3S1 APBB3 APOH ARF3 ARF5 ARF6 ARFRP2 ARMCX2 ASPH ATP6V0E ATRN B3GALT2 BAI2 BCAP29 BCL11B BHLHB2 BICD2 BMP4 BMX BPESC1 BRD1 BZRAP1 C18orf1 C20orf111 C4orf8 C4orf9 C5orf4 C6orf162 C7orf28A C9orf36 CACNG3 CADPS2 CAMP CASP5 CASP8AP2 CAST CCDC6 CCL20 CD1B CD44 CD72 CDC3…
122	V$PADS_C: Retroviral Poly A downstream element	302	302	874	4302	11842	-3.15	0	0.25	0.07	ACACA ADAM22 ADAMDEC1 ADD3 AFM AGTR1 AGXT AKAP12 AKAP4 ALDOC ALMS1 AP2B1 AP3S2 APBB3 APLP2 ARGBP2 ATP2A3 ATP5C1 ATP5E ATRN AVPR1A BATF BBS4 BGR BICD2 BMX BPESC1 BRD1 C10orf76 C16orf33 C18orf1 C1QDC1 C1orf41 C20orf19 C20orf67 C21orf2 C21orf62 C5orf4 C6orf109 C6orf210 C6orf32 C6orf62 C7orf28A CA11 CALM3 CAMKK2 CAMP CAP350 CASP4 CAST CHD2 CHD3 CHRNA1 CHRNA9 CLCN3 CLEC7A CLIPR-59 CLTA CMKLR1 CNDP2 CN…
123	V$AP1_Q2: activator protein 1	737	737	439	9982	6162	-3.15	0	1.22	0.3	AANAT ABAT ABCB1 ABCE1 ABLIM3 ACACA ACO2 ACTN1 ACTR8 ACYP2 ADAM18 ADAM30 ADAMDEC1 ADAMTS6 ADD3 ADH1A ADK ADORA2B AFM AGTR1 AGXT AKAP12 AKR1B1 AKR1C4 ALDH1A2 ALG8 ALMS1 ALPP ANK1 ANKHD1 ANKRD25 AP2B1 AP3S1 AP3S2 APBB3 APLP2 ARF6 ARFRP2 ARG2 ARGBP2 ARHGAP19 ARMCX2 ARSD ASPH ASTN ATF5 ATP2A3 ATP2B1 ATP2B2 ATP2B4 ATP5H ATP6V0E ATP6V1D ATP8A2 ATR AVPR1A B4GALT6 BAHD1 BBS7 BCL2 BGR BIRC2 BMX BPESC1 BPI…
124	V$E47_01: E47	230	230	946	2994	13150	-3.16	0	1.59	0.33	ABLIM3 ACTL7B ACYP2 ADAM30 ADH1A ADK AFM AGXT AKAP12 ALDH1A2 ANKRD25 AP2B1 ARF3 ARG2 ARMCX2 ATF5 ATP2B2 ATP5H B4GALT5 B4GALT6 BMX C11orf9 C17orf25 C18orf1 C1orf21 C20orf67 C21orf2 C6orf145 C6orf62 CADPS2 CASP9 CCL20 CD72 CDC42EP4 CESK1 CHRDL1 CHRNA9 CLST11240 CNOT1 CNR1 COBLL1 COL4A1 COMT CREBBP CRP CSF2RA CSNK1A1 CST1 CUTL1 DALRD3 DDX18 DET1 DJ462O23.2 DKFZP434H132 DLG1 DMN DNAI2 DOCK4 DSP DUSP1…
125	V$ETS1_B: c-ETS-1 binding site	519	519	657	7247	8897	-3.16	0	0.35	0.09	AANAT ABAT ABCE1 ABLIM3 ACACA ACCN1 ACYP2 ADAMTS6 ADARB2 ADD3 ADK AFM AGTR1 AKAP4 AKR1C4 ALDH8A1 ALDOC ALMS1 ALPP ANKHD1 ANP32B APBB3 ARF3 ARFRP2 ARGBP2 ARHGEF2 ARSD ASPH ATF5 ATP11A ATP2A3 ATP2B4 ATP5H ATP6V0E B3GALT2 B4GALT6 BAHD1 BATF BBS4 BCAP29 BCL2 BHLHB2 BIRC2 BMP4 BRAP BRD1 C10orf76 C16orf33 C18orf1 C20orf111 C20orf19 C21orf62 C3orf14 C4orf9 C5orf4 C6orf109 CACNG3 CALM3 CAMK1G CAMKK2 CAMP…
126	V$TATA_C: Retroviral TATA box	318	318	858	4220	11924	-3.17	0	1.35	0.31	ABAT ABCB1 ACACA ACSL6 ADAM18 ADAM22 ADAM30 ADAMTS6 ADD3 ADH1A ADK AFM AGXT AKAP12 AKR1B1 AKR1C4 ALDH1A2 ALDH8A1 ALDOB ALMS1 AMFR ANP32B AP3S1 AP3S2 APBB3 ARF6 ARFRP2 ARG2 ARGBP2 ARMCX2 ASPH ATP2B1 ATR ATRN B3GALT2 BBS7 BCL11B BMP4 BPESC1 BPI BZRP C1QDC1 C1S C3orf14 C6orf162 C6orf32 C9orf36 CACNG3 CAMKK2 CASP4 CASP5 CAST CCDC6 CD1B CD200 CD72 CDC2L6 CDC42EP4 CDH10 CDIPT CENPE CENTG1 CFHL2 CGA CHD…
127	V$XBP1_01: X-box-binding protein 1	125	125	1051	1558	14586	-3.19	0	1.91	0.33	AANAT ACCN1 AKAP12 ALDH8A1 APBB3 ARMCX2 ARNT2 ATP2B2 ATRN BCL11B BCL2 BHLHB2 C1orf41 C20orf111 C22orf3 CASP4 CASP9 CENTG1 CLCN3 COX7C CTBP1 D2LIC DAPK3 DKFZP564J0123 DKFZp547K1113 DLGAP2 DNCH1 DNCI2 DZIP1 EIF5B FBXW7 FCAR FGFR1 FKBP3 FKBP8 FLJ00060 FLJ10618 FLJ14146 GABRA5 GALNT10 GATA2 GNB1L HBEGF HLX1 HYOU1 ICAM1 IFNGR2 IL9R IMP4 INADL ING3 IRAK4 KCNAB1 KDELR3 KIAA0040 KIAA0143 KIF17 KIR2DL5 LO…
128	V$MYOD_01: myoblast determination gene product	839	839	337	11654	4490	-3.19	0	0.29	0.07	13CDNA73 AANAT ABAT ABLIM3 ACACA ACAD8 ACCN1 ACSL6 ACTL7B ACTN1 ACTR8 ACYP2 ADAM22 ADAM30 ADCY2 ADD3 ADH1A ADK ADORA2B AFM AGTR1 AGXT AKAP12 AKAP4 AKR1B1 ALDH1A2 ALDH3A2 ALDH8A1 ALDOB ALG8 ALMS1 ALPP AMFR ANK1 ANKHD1 ANKRD25 ANP32B AP2B1 AP3S1 AP3S2 ARF3 ARF6 ARFRP2 ARG2 ARGBP2 ARMCX2 ARNT2 ARSD ASPH ATF5 ATP11A ATP2A3 ATP2B2 ATP2B4 ATP5C1 ATP6V0E ATP6V1D ATR AVPR1A B3GALT2 B4GALT5 B4GALT6 BAI2 B…
129	V$NFE2_01: NF-E2 p45	123	123	1053	1852	14292	-3.19	0	0.14	0.05	ABLIM3 ADAMDEC1 ADD3 AGTR1 ALDH3A2 ALMS1 ANK1 AP3S1 ARFRP2 ARHGAP19 ASPH ATP5H BPI C10orf76 C16orf33 C21orf62 C6orf145 C6orf162 C6orf32 CADPS2 CAMP CDH1 CGI-12 CHD3 CLEC7A CNOT6 CREBBP CSF1 CSF2RA CSH2 CTAGE5 CYP19A1 CYP3A4 CYP3A7 DIO2 DKFZP434H132 DRE1 EIF5 ENTPD3 ESRRA FADS1 FLJ00060 FLJ14146 FLJ20619 FLNC FRG1 FTH1 GALNT10 GJB5 GNAS GPATC3 HLA-DPA1 HPGD HS3ST2 HTN3 IGSF6 IL12B ILT7 KCND1 KIAA0…
130	V$ETS2_B: c-Ets-2 binding sites	310	310	866	4114	12030	-3.19	0	1.34	0.31	AANAT ABAT ABLIM3 ACACA ACCN1 ACYP2 ADK AGTR1 ALDH8A1 ALDOC ALMS1 ANP32B AP2B1 APBB3 ARFRP2 ARHGEF2 ASPH ATF5 ATP2A3 ATP2B1 ATP2B4 ATP5H ATP6V0E B3GALT2 B4GALT6 BATF BCAP29 BCL2 BIRC2 BMP4 BMX BRAP BRD1 C16orf33 C18orf1 C20orf19 C3orf14 CALM3 CAMK1G CAMP CAPZA1 CASP4 CASP8AP2 CAST CCDC6 CCL20 CD1B CD68 CDH11 CDIPT CENTG1 CGA CHAF1A CHD2 CHD3 CLCNKB CLEC7A CLIC5 CMKLR1 CNR1 COL21A1 COLQ COPZ2 COX4…
131	V$CREBATF_Q6	433	433	743	5827	10317	-3.2	0	1.14	0.3	AANAT ABCE1 ACCN1 ACO2 ACSL6 ACTL7B ACTN1 ADAM22 ADAM30 ADAMTS6 ADARB2 ADK AKAP12 ANK1 ANKHD1 ANP32B AP2B1 AP3S2 APOH ARF5 ARF6 ARG2 ARMCX2 ARNT2 ATP11A ATP2B2 ATR ATRN B3GALT2 B4GALT6 BAHD1 BBS7 BCAP29 BCL11A BCL11B BGR BICD2 BIRC2 BPESC1 BRD1 C11orf9 C14orf1 C16orf33 C17orf25 C18orf1 C20orf111 C20orf67 C21orf2 C3orf14 C4orf8 C6orf106 C6orf62 C9orf36 CABP1 CALM3 CAP350 CAPZA1 CASK CASP4 CASP8AP2…
132	V$COUP_DR1_Q6	21	21	1155	410	15734	-3.2	0	0.04	0.02	ATP11A ATP2B1 CDC34 DKFZP434H132 DRD4 GPRC5C HS322B1A HSPC016 IER2 MAP2K3 MAPKAPK2 MGC10471 MMP11 MXD4 PAX8 PDC PPIE SLC25A6 SSH3 TNFRSF11B ZC3HDC1
133	V$FOX_Q2	825	825	351	11192	4952	-3.2	0	1.24	0.31	13CDNA73 AANAT ABAT ABCB1 ABCE1 ABLIM3 ACACA ACAD8 ACCN1 ACYP2 ADAM18 ADAMDEC1 ADAMTS6 ADD3 ADH1A ADK AFM AGTR1 AGXT AKAP12 AKAP4 AKR1C4 ALDH1A2 ALDH8A1 ALDOB ALG8 ALMS1 ANK1 ANP32B AP2B1 AP3S2 APLP2 APOH ARF3 ARF6 ARFRP2 ARG2 ARGBP2 ARHGAP19 ARMCX2 ARNT2 ARSD ASPH ASTN ATF5 ATP11A ATP2B1 ATP2B4 ATP5C1 ATP5E ATP6V0E ATP8A2 ATR AVPR1A B3GALT2 B4GALT5 BAI3 BATF BBS7 BCAP29 BCL11A BCL11B BCL2 BGR BI…
134	V$TFIIA_Q6	1037	1037	139	14073	2071	-3.21	0	1.77	0.33	13CDNA73 AANAT ABAT ABCB1 ABLIM3 ACACA ACAD8 ACCN1 ACO2 ACTL7B ACTN1 ACTR8 ACYP2 ADAM18 ADAM22 ADAM30 ADAMDEC1 ADARB2 ADD3 ADH1A ADK ADORA2B AFM AGTR1 AGXT AKAP12 AKAP4 AKR1B1 AKR1C4 ALDH1A2 ALDH8A1 ALDOB ALDOC ALG8 ALMS1 ALPP AMFR ANK1 ANKHD1 ANKRD25 ANP32B AP2B1 AP3S1 AP3S2 APBB3 APLP2 APOH ARF5 ARF6 ARFRP2 ARG2 ARGBP2 ARHGEF2 ARMCX2 ARNT2 ARSD ASPH ASTN ATF5 ATP11A ATP2A3 ATP2B1 ATP2B2 ATP2B4 …
135	V$GFI1_01: growth factor independence 1	309	309	867	4381	11763	-3.21	0	0.29	0.07	ABAT ACACA ACO2 ACTR8 ACYP2 ADAM22 ADD3 ADH1A AGTR1 AKAP12 AKR1B1 ALDH1A2 ALDOB ALPP APOH ARGBP2 ARHGAP19 ARHGEF2 ATF5 ATP5C1 ATP5E ATR B3GALT2 B4GALT5 BCL11B BICD2 BMP4 BPI BRAP BRD1 C10orf76 C14orf114 C16orf33 C18orf1 C1S C20orf111 C5orf4 C6orf109 CA1 CAMK1G CAST CCL20 CD1B CDH10 CDIPT CDK7 CENPE CENTG1 CEPT1 CESK1 CFHL2 CGGBP1 CGI-30 CHKB CHRDL1 CHRNA1 CHRNB3 CLDN10 CLEC7A CLST11240 CLTA CNAP1…
136	V$MINI20_B: Muscle initiator sequence-20	853	853	323	11577	4567	-3.21	0	1.26	0.31	13CDNA73 AANAT ABCE1 ABLIM3 ACACA ACAD8 ACSL6 ACTL7B ACTN1 ADAM18 ADAM22 ADARB2 ADCY2 ADD3 ADK ADORA2B AGTR1 AGXT AKAP12 AKAP4 AKR1B1 ALDH1A2 ALDH3A2 ALDOC ALG8 ALPP AMFR ANK1 ANKHD1 ANKRD25 ANP32B AP3S1 AP3S2 APBB3 APLP2 ARF6 ARFRP2 ARG2 ARHGEF2 ARMCX2 ARNT2 ARSD ASPH ATF5 ATP11A ATP2A3 ATP2B2 ATP2B4 ATP5C1 ATP5E ATP5H ATP6V0E ATP8A2 ATRN B4GALT5 B4GALT6 BAHD1 BAI2 BATF BBS7 BCAP29 BCL11A BCL2 B…
137	V$TAL1_Q6	518	518	658	7213	8931	-3.21	0	0.39	0.1	ABCE1 ABLIM3 ACACA ACAD8 ACCN1 ACTL7B ACTN1 ACYP2 ADAM22 ADAM30 ADCY2 ADK ADORA2B AFM AGXT AKAP4 AKR1B1 ALDH3A2 ALDOC ALMS1 ALPP ANK1 ANKHD1 ANP32B APBB3 APOH ARF3 ARF6 ARFRP2 ARG2 ARGBP2 ARMCX2 ASTN ATF5 ATP2B2 ATP2B4 ATP6V1D ATP8A2 ATRN AVPR1A B4GALT6 BAHD1 BAI2 BATF BICD2 BMX BPESC1 BZRAP1 BZRP C11orf9 C14orf114 C18orf1 C1QDC1 C20orf19 C20orf67 C21orf62 C4orf9 C5orf4 C6orf106 C6orf145 C6orf62 …
138	V$CMYB_01: c-Myb	262	262	914	3745	12399	-3.21	0	0.26	0.07	ACACA ACSL6 ADAM18 ADAM22 ADAM30 AGTR1 AKAP12 AKAP4 ALDH1A2 ALMS1 ANK1 APBB3 ARGBP2 ATP8A2 B4GALT5 BAI2 BBS4 BPESC1 BTG3 C14orf1 C14orf114 C17orf25 C18orf1 C21orf62 C5orf4 C6orf162 C6orf210 CACNG3 CALM3 CAP350 CASP4 CASP9 CCIN CD1B CD68 CDC2L6 CDC42EP4 CDK5R1 CDK7 CGA CGGBP1 CHD3 CHRNA9 CLCN3 CNAP1 CNOT6 COL11A2 COL5A2 COX4I1 CR1 CREBBP CRP CRYZ CSF2RB CSH2 CSNK2A2 CTAGE5 CTDSPL CYP3A4 CYP3A7 Cep…
139	V$VMYB_02: v-Myb	237	237	939	3405	12739	-3.21	0	0.24	0.07	ABCE1 ACAD8 ACTN1 ADAM18 ADAM22 ADAM30 ADCY2 ADD3 ADK AKAP12 ALDH3A2 ALDOB APOH ARMCX2 ASPH ASTN ATP5C1 ATP5H ATR BBS7 BCL2 BMP4 BMX BPESC1 BZRP C17orf25 C1orf41 C20orf18 C4orf9 C6orf106 C7orf28A CALM1 CALM3 CAP350 CAPZA1 CDC27 CDK5R1 CGGBP1 CHD3 CLIPR-59 CLTA CNAP1 CNDP2 CNOT6 COG2 COL11A2 COL4A1 COL5A2 COLQ CPT2 CRYM CSNK2A2 CUTL1 CYBRD1 DALRD3 DCLRE1A DDAH2 DIABLO DIO2 DKFZP434A0131 DKFZP564J0…
140	V$MRF2_01: modulator recognition factor 2	741	741	435	10276	5868	-3.22	0	0.38	0.1	13CDNA73 AANAT ABAT ABCB1 ABCE1 ABLIM3 ACACA ACCN1 ACO2 ACTL7B ACYP2 ADAM22 ADAMDEC1 ADARB2 ADD3 ADH1A ADK ADORA2B AFM AGTR1 AKAP12 AKR1B1 AKR1C4 ALDH8A1 ALDOB ALDOC ALG8 ALMS1 ALPP AMFR ANK1 ANKRD25 AP2B1 AP3S2 APOH ARF6 ARG2 ARGBP2 ARHGAP19 ARHGEF2 ARSD ASPH ASTN ATF5 ATP2B1 ATP5C1 ATP6V0E ATP6V1D ATR ATRN AVPR1A B3GALT2 BATF BBS4 BBS7 BCAP29 BCL11A BCL2 BGR BICD2 BIRC2 BMP4 BMX BPESC1 BPI BTG3…
141	V$STAT_01: signal transducers and activators of transcription	227	227	949	2967	13177	-3.22	0	1.49	0.33	ACAD8 ADAMTS6 ADARB2 AKAP12 AKR1B1 ALDH8A1 ALDOB ALPP ARF3 ARGBP2 ASPH ATP2B1 ATP5E B4GALT5 BBS7 BHLHB2 C11orf9 C1S C20orf111 C21orf2 C21orf62 C3orf14 CCL20 CCND3 CD40 CDC14B CDC27 CDC2L6 CDH10 CDIPT CHRNA1 CLIC5 CMKLR1 COLQ COX7C CRYM CSF1 CSH2 CSNK2A2 CST1 CYP3A4 D2LIC DELGEF DHRS9 DHX9 DMD DNCI2 DSP DUSP10 EGR1 EIF2AK1 EIF4E2 EPB49 ESR1 F9 FAM32A FAM53B FBXW7 FCGR2C FCN1 FKBP3 FLJ10521 FLJ1061…
142	V$CDPCR3HD_01: cut-like homeodomain protein	311	311	865	4140	12004	-3.22	0	1.26	0.31	ABLIM3 ACACA ACAD8 ACCN1 ACTR8 ACYP2 ADAM18 ADARB2 ADD3 ADH1A ADK AGTR1 AGXT AKAP12 AKR1B1 AKR1C4 ALDOC ANKHD1 ANKRD25 AP3S2 APOH ARF5 ARF6 ARGBP2 ARMCX2 ASPH ASTN ATP2B4 ATP5E ATR BAI3 BATF BBS4 BBS7 BCL2 BICD2 BMX BRD1 BZRP C1S C1orf21 C20orf18 C21orf62 C4orf8 CA1 CAMK1G CAMP CAPZA1 CASP4 CASP9 CCL22 CD1B CD200 CD40 CD44 CD68 CDC2L6 CDH1 CDH10 CESK1 CGI-30 CHAF1A CHRNB3 CLN8 CLST11240 CNAP1 COL…
143	V$CEBP_C: C/EBP binding site	288	288	888	3817	12327	-3.22	0	1.33	0.31	ABAT ACTN1 ACTR8 ACYP2 ADARB2 ADK ADORA2B AFM AGXT AKR1B1 AKR1C4 ALDH3A2 ALDH8A1 ALDOB AMFR ANK1 ANP32B APBB3 ARF3 ARSD ASPH ATP2B4 ATP5C1 ATP6V0E ATR AVPR1A B3GALT2 BBS4 BMX C14orf114 C16orf33 C20orf111 C20orf67 C21orf62 C22orf3 C4orf8 C6orf210 C7orf28A C9orf36 CAMK1G CAMKK2 CAST CCL22 CD1B CD200 CD68 CDC14B CDC27 CDC2L6 CENTG1 CFHL2 CFLAR CGA CHKB CLCNKB CLEC7A CMKLR1 CNAP1 CNOT1 COBLL1 COLQ CO…
144	V$GATA1_02: GATA-binding factor 1	392	392	784	5269	10875	-3.22	0	1.13	0.3	ABAT ABCE1 ACAD8 ACSL6 ACTR8 ACYP2 ADAM22 ADCY2 ADD3 ADH1A AGTR1 ALDOB ANK1 ANKRD25 APLP2 APOH ARFRP2 ARG2 ARHGAP19 ARSD ATF5 ATP11A ATP2A3 ATP2B1 ATP2B2 ATR AVPR1A BBS4 BBS7 BIRC2 BMP4 BPESC1 BRAP C11orf9 C14orf114 C1S C20orf111 C21orf62 C3orf14 C5orf4 C6orf109 C6orf162 C6orf210 C6orf32 C7orf28A CA1 CA11 CADPS2 CAMP CASP4 CASP8AP2 CASP9 CAST CCDC6 CCIN CD1B CD44 CDC14B CDC27 CDIPT CDKN2D CEPT1 C…
145	V$RFX1_01: X-box binding protein RFX1	525	525	651	7295	8849	-3.22	0	0.43	0.11	ABCE1 ABLIM3 ACAD8 ACTN1 ADAM22 ADAM30 ADAMTS6 ADARB2 ADD3 ADK ADORA2B AGXT AKR1B1 ALMS1 ANK1 ANKRD25 ANP32B AP3S1 AP3S2 ARF3 ARF5 ARFRP2 ARG2 ARMCX2 ASPH ATP2B1 ATP2B2 ATP6V1D ATP8A2 ATRN AVPR1A B3GALT2 B4GALT6 BAHD1 BAI2 BBS4 BCAP29 BCL11A BHLHB2 BMP4 BTG3 BZRP C17orf25 C18orf1 C1QDC1 C21orf2 C22orf3 C3orf14 C4orf8 C4orf9 C5orf4 C6orf109 C6orf162 C6orf62 C7orf28A CACNG3 CADPS2 CAMKK2 CAMP CAP35…
146	V$E47_02: E47	199	199	977	2883	13261	-3.23	0	0.22	0.07	ACCN1 ACSL6 ACTR8 ACYP2 ADH1A ADK ADORA2B AFM AGTR1 ALDH1A2 ALMS1 ANK1 ANKRD25 AP2B1 ARG2 ARMCX2 ARNT2 ATF5 ATP2B2 ATP6V0E ATR AVPR1A B4GALT5 BCAP29 BGR BTN2A2 C10orf76 C11orf9 C17orf25 C20orf19 C6orf162 C6orf210 C6orf32 C6orf62 CA11 CADPS2 CASP4 CD40 CDH1 CESK1 CGA CHRNA1 CHRNA9 CHRNB3 CLCNKB CNR1 COAS2 CPNE3 CSNK1A1 CSPG3 DALRD3 DAZAP2 DDX28 DEC1 DHRS9 DHX32 DJ462O23.2 DKFZP434H132 DKFZP564J012…
147	V$XFD1_01: Xenopus fork head domain factor 1	161	161	1015	2058	14086	-3.24	0	1.68	0.33	ACYP2 ADAM18 AFM AGTR1 AGXT AKAP4 ALDOB ANP32B ARGBP2 ARHGAP19 ARNT2 ATP2B1 ATP5C1 B3GALT2 BAI3 BBS7 BIRC2 BMX C14orf1 C14orf114 C9orf36 CASP4 CAST CD44 CDH10 CDKN2D CENTG1 CHD2 COAS2 CRP CSNK1G3 CST1 CTAGE5 CTBP2 CTTN DDC DDX18 DHRS9 DMD DNAI2 DPF3 DSP DUSP10 EIF3S9 F9 FCAR FDFT1 FLJ13955 FLJ20619 FXYD6 FZR1 GIT2 GLRA3 GLUD1 GLUD2 GPATC3 GRAP HBB HLA-DPB1 HMGN3 HOXA9 HRMT1L1 HTN3 IER2 IFNGR2 IL1…
148	V$OCT1_06: octamer-binding factor 1	565	565	611	7684	8460	-3.24	0	0.93	0.23	AANAT ABCB1 ABCE1 ACACA ACAD8 ACO2 ACTR8 ACYP2 ADAM18 ADAMDEC1 ADARB2 ADD3 ADH1A ADK AFM AGTR1 AKAP12 AKAP4 AKR1B1 AKR1C4 ALDH1A2 ALDOB ALDOC ALG8 ALMS1 ALPP AMFR AP2B1 AP3S1 APBB3 APOH ARF5 ARF6 ARFRP2 ARG2 ARGBP2 ARHGAP19 ARMCX2 ARNT2 ASPH ASTN ATP2B1 ATP2B2 ATP2B4 ATP5H ATP6V1D AVPR1A B3GALT2 B4GALT5 BAI2 BBS4 BBS7 BCAP29 BCL11A BCL2 BIRC2 BMP4 BMX BPESC1 BPI BRAP BTG3 BZRAP1 C10orf76 C18orf1 …
149	V$RFX1_02: X-box binding protein RFX1	445	445	731	6021	10123	-3.24	0	1.01	0.24	AANAT ACACA ACO2 ADAM22 ADARB2 ADD3 ADK AGXT AKAP12 ALMS1 ALPP AMFR ANK1 ANKHD1 AP3S1 APBB3 APOH ARF6 ARG2 ARGBP2 ARHGAP19 ARMCX2 ATP11A ATP5C1 ATP5E ATP6V0E ATP6V1D ATP8A2 ATR ATRN B3GALT2 B4GALT6 BAI2 BATF BBS7 BGR BIRC2 BPI BRAP BRD1 BZRAP1 C17orf25 C18orf1 C21orf2 C21orf62 C22orf3 C3orf14 C5orf4 C6orf109 C6orf145 C6orf162 C6orf32 C7orf28A CA11 CACNG3 CALM3 CAMP CASP8AP2 CAST CCND3 CD68 CD72 C…
150	V$AHR_Q5: aryl hydrocarbon / dioxin receptor	190	190	986	2462	13682	-3.25	0	1.54	0.33	ACACA ACCN1 ACO2 ACTN1 ADAMDEC1 ADAMTS6 ADD3 ANK1 AP3S1 ASPH B4GALT6 C16orf33 C1QDC1 C1S C1orf21 C1orf41 C20orf67 C6orf109 CAP350 CDC27 CDH11 CDIPT CDKN2D CGI-12 CLDN10 CNAP1 COLQ COX6B1 CPNE3 CREBBP CSNK2A2 CTAG1B CTAGE5 D2LIC DCLRE1A DKFZP434A0131 DKFZP586M1120 DLX2 DMN DNTT DRD4 EGR1 EIF3S9 ETV1 FAM50A FAM53B FDFT1 FGFR1OP FLJ10521 FLJ10925 FLJ11767 FLJ36754 FMR2 FOXO3A GALNT10 GCNT3 GLUD1 GLU…
151	V$PEBP_Q6	237	237	939	3394	12750	-3.25	0	0.26	0.07	ABCE1 ACYP2 ADAM18 ADAM22 ADAMDEC1 ADORA2B AGTR1 AGXT AKAP12 AKR1B1 ALDOC ANK1 ANKHD1 ATP11A ATP5C1 ATP8A2 BGR BIRC2 BMP4 BMX BPESC1 BPI BRD1 C18orf1 C4orf9 C5orf4 C6orf62 CA1 CAST CCIN CD1B CD72 CDC42EP4 CFHL2 CFLAR CHRNA1 CHRNB3 CLCNKB CLDN10 CLEC7A CLTA CMKLR1 CNR1 COG2 COLQ COMT COX7C CPNE3 CPT2 CR1 CSF2 CSF2RA CSNK1G3 CSPG3 CTAGE5 Cep192 D2LIC DAZAP2 DCLRE1A DDAH2 DDC DHRS9 DKFZP586M1120 DLE…
152	V$EVI1_04: ectopic viral integration site 1 encoded factor	795	795	381	11013	5131	-3.25	0	0.38	0.1	13CDNA73 ABAT ABCB1 ABCE1 ABLIM3 ACACA ACAD8 ACO2 ACSL6 ACTL7B ACTR8 ACYP2 ADAM18 ADAM22 ADAM30 ADAMDEC1 ADAMTS6 ADD3 ADH1A ADK ADORA2B AFM AGTR1 AGXT AKAP12 AKAP4 AKR1B1 AKR1C4 ALDH1A2 ALDH3A2 ALDH8A1 ALDOB ALG8 ALMS1 AMFR ANKHD1 ANKRD25 ANP32B AP2B1 AP3S2 APBB3 APOH ARF6 ARFRP2 ARG2 ARGBP2 ARHGAP19 ARHGEF2 ARMCX2 ARNT2 ARSD ASPH ASTN ATF5 ATP2A3 ATP2B1 ATP2B4 ATP5C1 ATP5E ATP8A2 ATR AVPR1A B3GA…
153	V$SMAD3_Q6	623	623	553	8487	7657	-3.25	0	0.9	0.23	13CDNA73 ABAT ABCB1 ABCE1 ABLIM3 ACACA ACAD8 ACO2 ACSL6 ACTL7B ACTN1 ADAM18 ADAM22 ADD3 ADH1A AGTR1 AKAP12 AKAP4 AKR1C4 ALDH1A2 ALDOC ALMS1 AMFR ANK1 ANKHD1 APBB3 APLP2 APOH ARF3 ARF6 ARFRP2 ARGBP2 ARHGEF2 ARNT2 ATF5 ATP11A ATP2A3 ATP2B4 ATP5E ATP5H ATP6V0E AVPR1A B3GALT2 B4GALT5 B4GALT6 BAHD1 BAI3 BATF BBS4 BCAP29 BGR BHLHB2 BIRC2 BMX BPESC1 BRD1 BTG3 BTN2A2 BZRAP1 BZRP C17orf25 C18orf1 C1QDC1 C…
154	V$TCF4_Q5	821	821	355	11376	4768	-3.26	0	0.36	0.09	13CDNA73 ABAT ABCB1 ABCE1 ACACA ACAD8 ACCN1 ACO2 ACSL6 ACTL7B ACTN1 ACTR8 ACYP2 ADAM22 ADAM30 ADAMDEC1 ADARB2 ADD3 ADH1A ADK AFM AGTR1 AGXT AKAP12 AKAP4 AKR1B1 AKR1C4 ALDH1A2 ALDOC ALG8 AMFR ANKHD1 ANP32B AP2B1 AP3S1 APBB3 APOH ARF3 ARF6 ARFRP2 ARG2 ARGBP2 ARHGAP19 ARHGEF2 ARMCX2 ARNT2 ARSD ASPH ASTN ATP11A ATP2B1 ATP2B2 ATP5E ATP6V0E ATP6V1D ATP8A2 ATR ATRN B3GALT2 B4GALT5 BAI3 BATF BBS4 BCAP29 …
155	V$SOX9_B1: SOX (SRY-related HMG box)	589	589	587	8031	8113	-3.26	0	0.86	0.23	13CDNA73 ABAT ABCB1 ABCE1 ABLIM3 ACACA ACAD8 ACCN1 ACO2 ADAM22 ADAM30 ADAMDEC1 ADARB2 ADD3 ADORA2B AFM AGTR1 AKAP4 AKR1C4 ALDH1A2 ALDH8A1 ALDOB ALDOC AMFR ANKHD1 ANP32B AP2B1 APBB3 APLP2 APOH ARF3 ARF5 ARG2 ARHGEF2 ARMCX2 ASTN ATP2B1 ATP2B4 ATP6V0E ATP8A2 ATR AVPR1A B3GALT2 B4GALT5 BATF BBS4 BCAP29 BCL11B BCL2 BGR BICD2 BIRC2 BMX BPESC1 BPI BZRP C10orf76 C14orf114 C16orf33 C17orf25 C18orf1 C1S C1…
156	V$CART1_01: Cart-1 (cartilage homeoprotein 1)	146	146	1030	1859	14285	-3.27	0	1.67	0.33	ABCB1 ACACA ADARB2 ADK AFM AKAP12 AKR1C4 ALDH1A2 ALG8 ALMS1 ARSD ATP2B1 ATP5E ATP6V0E BAI3 BPI C14orf114 C4orf8 C6orf32 CA1 CASP5 CDIPT CDKN2D CENPE CHAF1A CLCN3 CLDN10 CMKLR1 COAS2 COL5A2 COLQ CSH2 CSNK1A1 CTAGE5 DAPK3 DDX18 DIO2 DKFZP434A0131 DMD EMR2 ENSA ETFA EVI1 FCAR FLJ00060 FLJ10521 FLJ20323 FLJ22222 FOXO1A FSD1 GABRA5 GEMIN6 GNAS GPM6A GPR64 GRIA2 HBEGF HLA-DPA1 HRBL HS322B1A HTN3 IDS IG…
157	V$LEF1TCF1_Q4	477	477	699	6496	9648	-3.27	0	0.86	0.23	AANAT ABAT ABCB1 ACACA ACTR8 ADAM30 ADAMTS6 ADARB2 ADH1A ADK ADORA2B AFM AKAP12 AKR1B1 AKR1C4 ALDOB ALMS1 AP3S1 APOH ARG2 ARHGAP19 ARHGEF2 ARNT2 ARSD ATP11A ATP2B1 ATP5E ATP8A2 AVPR1A B3GALT2 B4GALT5 BAI3 BCAP29 BGR BMP4 BMX BPESC1 BTG3 BTN2A2 C10orf76 C14orf1 C14orf114 C16orf33 C17orf25 C18orf1 C1S C20orf67 C5orf4 C6orf210 C6orf32 C7orf28A C9orf36 CA1 CABP1 CACNG3 CADPS2 CALM3 CAMK1G CAMKK2 CASP…
158	V$LMO2COM_02: complex of Lmo2 bound to Tal-1, E2A proteins, and GATA-1, half-site 2	580	580	596	7994	8150	-3.27	0	0.57	0.16	ABAT ABCB1 ABCE1 ACAD8 ACCN1 ACO2 ACSL6 ACTR8 ACYP2 ADAM18 ADAM22 ADAM30 ADAMDEC1 ADCY2 ADD3 ADH1A ADK AFM AGTR1 AGXT AKAP12 AKAP4 AKR1B1 AKR1C4 ALDH1A2 ALDH8A1 ALDOB ALG8 ANK1 ANKHD1 ANKRD25 AP3S2 APLP2 APOH ARFRP2 ARGBP2 ARHGAP19 ARMCX2 ARNT2 ARSD ASPH ASTN ATF5 ATP2A3 ATP2B1 ATP2B2 ATP6V1D ATP8A2 ATR AVPR1A BATF BBS4 BBS7 BCL11A BCL2 BHLHB2 BICD2 BIRC2 BMP4 BMX BPESC1 BRAP BTN2A2 BZRAP1 C14orf…
159	V$USF_C: USF binding site	498	498	678	6781	9363	-3.27	0	0.87	0.23	AANAT ACCN1 ACO2 ACSL6 ACTN1 ADAM22 ADAM30 ADAMTS6 ADARB2 ADCY2 ADD3 ADK ADORA2B AGTR1 AKAP12 AKAP4 ALDH3A2 ALDH8A1 ALDOC ALMS1 ALPP AMFR ANP32B AP2B1 APBB3 ARF5 ARF6 ARFRP2 ARHGEF2 ARMCX2 ASPH ASTN ATP2B1 ATP2B2 ATP6V0E B3GALT2 B4GALT5 BAI2 BCAP29 BCL11B BHLHB2 BMP4 BMX BPESC1 BRD1 BTN2A2 BZRAP1 C11orf9 C14orf114 C18orf1 C1QDC1 C20orf111 C21orf62 C22orf3 C4orf9 C5orf4 C6orf162 C7orf28A C9orf36 C…
160	V$SMAD4_Q6	504	504	672	6878	9266	-3.28	0	0.81	0.23	13CDNA73 AANAT ABAT ACACA ACAD8 ACO2 ACSL6 ACTL7B ADAM22 ADAM30 ADH1A AGTR1 AKAP12 AKAP4 ALDH1A2 ALDH8A1 ALDOB ALDOC ALG8 ALMS1 AMFR ANK1 AP3S1 AP3S2 APLP2 APOH ARFRP2 ARGBP2 ARHGAP19 ARHGEF2 ASPH ASTN ATF5 ATP11A ATP2A3 ATP2B4 ATP5C1 ATP5H ATP6V1D ATRN B3GALT2 B4GALT6 BAHD1 BAI3 BBS4 BBS7 BHLHB2 BICD2 BMP4 BPI BZRAP1 C10orf76 C18orf1 C1QDC1 C20orf111 C20orf18 C20orf19 C20orf67 C21orf62 C22orf3 C…
161	V$CEBPDELTA_Q6	863	863	313	11741	4403	-3.28	0	1.12	0.3	13CDNA73 ABAT ABCB1 ABLIM3 ACACA ACAD8 ACO2 ACSL6 ACTL7B ACTN1 ACTR8 ACYP2 ADAM18 ADAM30 ADAMDEC1 ADAMTS6 ADARB2 ADD3 ADH1A ADK ADORA2B AFM AGTR1 AGXT AKAP12 AKAP4 AKR1B1 AKR1C4 ALDH1A2 ALDH8A1 ALDOB ALDOC ALG8 ALMS1 ALPP AMFR ANK1 AP2B1 AP3S1 AP3S2 APBB3 APLP2 APOH ARF3 ARF5 ARG2 ARGBP2 ARHGAP19 ARMCX2 ARNT2 ARSD ASPH ASTN ATF5 ATP2B1 ATP2B4 ATP5C1 ATP5E ATP6V0E ATP6V1D ATP8A2 ATR ATRN AVPR1A B3…
162	V$CDPCR1_01: cut-like homeodomain protein	814	814	362	11262	4882	-3.29	0	0.41	0.1	13CDNA73 ABAT ABCE1 ABLIM3 ACACA ACAD8 ACCN1 ACO2 ACTR8 ACYP2 ADAM18 ADAMDEC1 ADARB2 ADD3 ADH1A ADK AFM AGTR1 AGXT AKAP12 AKR1B1 AKR1C4 ALDH1A2 ALDH3A2 ALDH8A1 ALDOB ALDOC ALMS1 ALPP AMFR ANKHD1 ANKRD25 AP2B1 AP3S1 AP3S2 APOH ARF5 ARF6 ARFRP2 ARG2 ARGBP2 ARMCX2 ASPH ASTN ATF5 ATP2A3 ATP2B1 ATP2B2 ATP2B4 ATP5C1 ATP5E ATP6V0E ATR ATRN AVPR1A B3GALT2 BAHD1 BAI3 BATF BBS4 BBS7 BCAP29 BCL11B BCL2 BICD…
163	V$NERF_Q2: new ets-related factor 1a	55	55	1121	897	15247	-3.29	0	0.09	0.04	ACYP2 APBB3 ARHGEF2 ARSD C16orf33 CASP4 CCIN CD40 CD79B CDC14B CHKB CSE1L DIABLO DLGAP4 DOK4 FAM32A FLJ13955 FZR1 GABRA5 GJA5 GLUL INHBA ITGB3 KCNAB2 KCND1 LHCGR LYPDC1 MAP3K9 MET MGC3101 PAK3 PIK3R1 POLDIP3 PPIA PPP2R3A PRDM2 PRKAR2A PRKCBP1 PTMS RGS3 RGS4 SCYL2 SLC11A1 SLC35A3 SUPT4H1 TCTEL1 TEAD3 THY1 TNXB TRIP3 UBE3B WIG1 YWHAZ ZA20D3 ZNF350
164	V$AREB6_02: AREB6 (Atp1a1 regulatory element binding factor 6)	476	476	700	6510	9634	-3.3	0	0.75	0.22	ABAT ACACA ACAD8 ACCN1 ACSL6 ACTR8 ACYP2 ADAM18 ADAM22 ADD3 ADH1A ADK AFM AGTR1 AGXT ALDH1A2 ALDOB ALG8 ALMS1 ALPP ANK1 ANKHD1 ANP32B ARF3 ARF6 ARFRP2 ARG2 ARHGAP19 ARMCX2 ATP2B2 ATP5C1 ATP5E ATP6V0E ATP6V1D ATR BAI2 BATF BBS4 BCAP29 BGR BMP4 BPESC1 BTN2A2 C10orf76 C11orf9 C14orf114 C18orf1 C1QDC1 C1orf21 C20orf111 C20orf19 C4orf8 C5orf4 C6orf162 C6orf210 C6orf32 CACNG3 CADPS2 CALM1 CAMKK2 CAMP C…
165	V$USF_01: upstream stimulating factor	142	142	1034	2095	14049	-3.31	0	0.19	0.06	ADAMTS6 ADK ADORA2B AKAP12 ALDH3A2 ALDOC AMFR APBB3 ARF5 ARMCX2 ASPH ATP6V0E B3GALT2 BHLHB2 BPESC1 C22orf3 C4orf9 C5orf4 C7orf28A CAST CDK5R1 CDK7 CDKN2D CGI-30 CHAF1A CLCN3 CLCNKB CNDP2 COMT CTAG1B CTBP2 DDX52 DHX32 DIO2 DKFZP586M1120 DLX2 DZIP1 EIF3S12 EIF3S9 FAF1 FDFT1 FLJ10618 FLJ12716 FZR1 GABRA5 GNAS HERC1 HLX1 HMGN4 HNRPA3 HNRPDL HOXA9 HSA9761 HSPC016 ICA1 INSR IRAK4 ITGB1 JPH2 KCNAB1 KIAA…
166	V$SREBP_Q3	439	439	737	6002	10142	-3.31	0	0.75	0.22	AANAT ACAD8 ACSL6 ACTL7B ACTR8 ADAMDEC1 ADD3 ADK ADORA2B AGTR1 AGXT AKAP12 AKR1B1 ALDH1A2 ALDH3A2 ALDOC ALMS1 ALPP AMFR ANK1 AP3S2 APBB3 ARG2 ARGBP2 ARHGAP19 ARMCX2 ASTN ATF5 ATP11A ATP2A3 ATP2B2 ATP6V0E ATP6V1D ATP8A2 B4GALT5 BCL11A BGR BHLHB2 BPESC1 BTN2A2 BZRAP1 C10orf76 C11orf9 C14orf1 C14orf114 C16orf33 C18orf1 C1S C20orf111 C20orf18 C20orf19 C3orf14 C5orf4 C6orf145 C6orf162 CA1 CACNG3 CADPS…
167	V$BRN2_01: POU factor Brn-2	437	437	739	5985	10159	-3.31	0	0.72	0.21	13CDNA73 AANAT ABAT ABCB1 ACACA ACCN1 ACO2 ACYP2 ADAM18 ADAM30 ADAMDEC1 ADARB2 ADH1A ADK ADORA2B AFM AGTR1 AKAP12 AKAP4 AKR1B1 AKR1C4 ALDH1A2 ALDH8A1 ALDOB ALMS1 ANK1 ANP32B AP2B1 AP3S2 APOH ARF6 ARG2 ARGBP2 ARHGAP19 ARMCX2 ARNT2 ARSD ASPH ASTN ATF5 ATP2B1 ATRN AVPR1A B3GALT2 BAI3 BBS4 BBS7 BCAP29 BCL11A BCL11B BIRC2 BMX C14orf114 C18orf1 C1QDC1 C20orf111 C20orf18 C5orf4 C6orf106 C6orf162 C6orf32…
168	V$CETS1P54_01: c-Ets-1(p54)	836	836	340	11550	4594	-3.33	0	0.44	0.11	13CDNA73 ABAT ABCB1 ACACA ACAD8 ACCN1 ACO2 ACSL6 ACTL7B ACYP2 ADAM22 ADAM30 ADARB2 ADCY2 ADD3 ADK ADORA2B AGTR1 AGXT AKAP12 AKR1B1 ALDH1A2 ALDH3A2 ALDOB ALDOC ALG8 ALMS1 ALPP ANK1 ANKHD1 ANP32B AP2B1 AP3S1 AP3S2 APBB3 APLP2 APOH ARF3 ARF6 ARFRP2 ARG2 ARGBP2 ARHGAP19 ARHGEF2 ARMCX2 ARSD ASPH ATP11A ATP2A3 ATP2B1 ATP2B2 ATP2B4 ATP5C1 ATP5H ATP6V0E ATP6V1D ATR ATRN B4GALT6 BAHD1 BAI2 BATF BBS4 BBS7 …
169	V$HNF4ALPHA_Q6	371	371	805	5049	11095	-3.33	0	0.83	0.23	AANAT ABCE1 ABLIM3 ACACA ACAD8 ACO2 ACSL6 ACTR8 ADAM18 ADAM22 ADAM30 ADD3 ADH1A ADORA2B AGTR1 AKAP12 ALDH8A1 ALDOC ALG8 APBB3 ARG2 ARGBP2 ARHGEF2 ARSD ASPH ASTN ATP2B1 ATP6V0E ATR B3GALT2 BAI2 BAI3 BPESC1 BPI BRAP BTG3 C14orf1 C18orf1 C1S C1orf21 C20orf111 C4orf8 C5orf4 C6orf109 C6orf210 C6orf62 CA1 CABP1 CACNG3 CADPS2 CASP5 CAST CCDC6 CCL20 CCND3 CD1B CD72 CDC27 CDC34 CDC42EP4 CDK5R1 CDKN2D CFHL…
170	V$TCF1P_Q6	787	787	389	10774	5370	-3.33	0	0.77	0.22	13CDNA73 AANAT ABAT ABCB1 ABCE1 ABLIM3 ACACA ACAD8 ACCN1 ACO2 ACSL6 ACTL7B ACYP2 ADAM18 ADAM22 ADAM30 ADARB2 ADCY2 ADD3 ADK AFM AGTR1 AGXT AKAP12 AKAP4 AKR1B1 ALDH1A2 ALDH3A2 ALDOB ALDOC ALMS1 AMFR ANK1 ANKHD1 ANP32B AP2B1 AP3S2 APBB3 APOH ARF3 ARF6 ARFRP2 ARG2 ARGBP2 ARHGEF2 ASPH ASTN ATF5 ATP11A ATP2B4 ATP5C1 ATP5E ATP5H ATP6V0E ATP8A2 ATRN B4GALT6 BAHD1 BATF BBS4 BBS7 BCL11A BCL11B BGR BHLHB2 …
171	V$IK3_01: Ikaros 3	128	128	1048	1621	14523	-3.34	0	1.66	0.33	AANAT ABCB1 ACAD8 ACTN1 ALDH8A1 ALDOB ANKHD1 AP3S1 ASPH B4GALT5 BATF BBS7 C21orf2 C6orf32 CDC27 CLCNKB CNOT1 COBLL1 COLQ CREBBP CTBP2 D2LIC DAZAP2 DELGEF DLGAP4 DMD DUSP10 DUSP6 EMR2 FAM50A FCGR2C FLJ10925 FLJ11767 FLJ13646 FLJ22573 GALNT10 GATA3 GBA GCAT GCLC GJA5 GLRA3 GRIK3 HIC HMGCR HMGN3 HMGN4 HOXA9 HPCA HS322B1A IMP4 IRAK4 IRF8 ITGBL1 KCNA5 KIAA0143 LCE2B LDHA LETMD1 LMAN2 LRP10 MAOA MAPBPI…
172	V$MYC_Q2	261	261	915	3480	12664	-3.34	0	1.15	0.3	ACO2 ADAM30 ADAMTS6 ADK ADORA2B AKAP12 ALDH3A2 ALDOC ALPP AMFR ANP32B APBB3 ARF5 ARF6 ARFRP2 ASPH ATP6V0E B3GALT2 BAI2 BCL11B BHLHB2 BMP4 BPESC1 BRD1 C18orf1 C20orf111 C22orf3 C4orf9 C5orf4 C6orf162 C7orf28A C9orf36 CACNG3 CADPS2 CAST CCDC6 CDK5R1 CDKN2D CENPE CGI-12 CGI-30 CLCN3 CLCNKB CLDN10 CLIPR-59 CNDP2 CNNM1 COLQ COMT COX7C CPNE3 CRP CSF2 CSF2RA CSF2RB CTAG1B CTAGE5 CTBP2 CTTN CUTL1 CYP19A1…
173	V$SRF_Q5_01	357	357	819	4853	11291	-3.34	0	0.85	0.23	ABAT ACACA ACCN1 ACTN1 ADAM22 ADAM30 ADAMDEC1 ADD3 ADK AKAP12 AKR1C4 ALDH1A2 ALDH3A2 ALDOB ANKRD25 APBB3 APLP2 ARF6 ASPH ASTN ATP2A3 ATP2B2 ATP5C1 ATP8A2 ATRN BATF BBS4 BBS7 BCL2 BICD2 BMP4 BMX BPESC1 BPI BRAP BTG3 C14orf1 C18orf1 C1S C20orf67 C21orf62 C22orf3 C5orf4 C6orf109 C6orf162 CA1 CA11 CABP1 CACNG3 CAMKK2 CAMP CAP350 CASP4 CASP5 CAST CCIN CCL22 CD40 CD44 CD68 CD79B CDC42EP4 CDIPT CDK7 CDK…
174	V$LEF1_Q6	1034	1034	142	14056	2088	-3.35	0	1.55	0.33	13CDNA73 AANAT ABAT ABCB1 ABCE1 ABLIM3 ACACA ACAD8 ACCN1 ACO2 ACTL7B ACTN1 ACTR8 ACYP2 ADAM18 ADAM22 ADAM30 ADAMDEC1 ADAMTS6 ADARB2 ADCY2 ADD3 ADH1A ADK ADORA2B AFM AGTR1 AKAP12 AKAP4 AKR1B1 AKR1C4 ALDH1A2 ALDH3A2 ALDH8A1 ALDOB ALMS1 ALPP AMFR ANK1 ANKHD1 ANKRD25 ANP32B AP2B1 AP3S1 AP3S2 APBB3 APOH ARF5 ARF6 ARG2 ARGBP2 ARHGAP19 ARHGEF2 ARMCX2 ARNT2 ARSD ASPH ASTN ATF5 ATP11A ATP2A3 ATP2B1 ATP2B2…
175	V$E12_Q6	361	361	815	4927	11217	-3.35	0	0.78	0.22	AANAT ABAT ABLIM3 ACCN1 ACO2 ACSL6 ACTL7B ACTN1 ACTR8 ACYP2 ADAM30 ADK ADORA2B AFM AGXT AKAP4 ALDH1A2 ALDH3A2 ALPP AMFR ANK1 ANKHD1 ANKRD25 AP3S2 ARF3 ARGBP2 ARNT2 ATF5 ATP2B2 AVPR1A B4GALT5 BAI2 BMX C11orf9 C18orf1 C20orf18 C20orf67 C21orf2 C6orf145 C6orf32 C6orf62 C9orf36 CA11 CACNG3 CADPS2 CAMKK2 CASP4 CASP9 CCDC6 CCL20 CCL22 CD200 CD68 CD72 CD79B CDC42EP4 CDH1 CDK7 CGA CHRDL1 CHRNA1 CHRNB3 CL…
176	V$MMEF2_Q6: myocyte enhancer factor	365	365	811	4985	11159	-3.35	0	0.76	0.22	ABCB1 ACAD8 ACCN1 ACSL6 ACYP2 ADAM18 ADAM30 ADARB2 ADD3 ADK ADORA2B AGTR1 ALDH8A1 ALDOB ALG8 AMFR ANP32B AP3S1 AP3S2 APOH ARF5 ARG2 ARGBP2 ARNT2 ASPH ASTN ATP5E ATRN AVPR1A B3GALT2 BAI3 BATF BCL11A BCL11B BCL2 BICD2 BIRC2 BMX BPI BTN2A2 C14orf114 C1S C21orf2 C21orf62 C4orf8 C5orf4 C6orf210 C6orf32 C9orf36 CA1 CAMK1G CAMKK2 CASP4 CASP5 CAST CCL20 CD1B CD200 CD72 CDH1 CDH10 CDIPT CENPE CFHL2 CGGBP1…
177	V$TITF1_Q3: TTF-1, TITF1 (thyroid transcription factor 1)	369	369	807	5062	11082	-3.36	0	0.68	0.21	ACACA ACCN1 ACTL7B ACTR8 ADAM22 ADAM30 ADAMDEC1 ADAMTS6 ADD3 ADK AFM AGTR1 AGXT AKAP12 AKAP4 AKR1C4 ALDH1A2 ALDOB AMFR ANK1 ANP32B APOH ARSD ASPH ASTN ATP11A ATP5C1 ATP6V1D ATP8A2 ATRN AVPR1A BATF BBS7 BCAP29 BCL2 BHLHB2 BMX BPESC1 BRAP C10orf76 C11orf9 C14orf114 C18orf1 C1QDC1 C1S C20orf18 C20orf67 C6orf106 CA1 CABP1 CASP4 CCL22 CD200 CD40 CD79B CDC34 CDIPT CENPE CESK1 CFHL2 CGI-30 CHD2 CHD3 CLD…
178	V$MEF2_02: myogenic MADS factor MEF-2	93	93	1083	1144	15000	-3.36	0	1.84	0.33	AFM AGTR1 AKR1B1 ARSD ASPH BICD2 C5orf4 C6orf210 CA1 CAMKK2 CCL20 CD200 CLCN3 CLDN10 COL5A2 CTAGE5 CYBRD1 DET1 DMD DMN DNCI2 EDF1 FAF1 FBXO3 FLJ14146 FYCO1 GJA5 GPATC3 HBB HBEGF HERC1 HIST2H4 HLX1 HTN3 IL20RA ING3 ITM2A KCNC3 KIAA0143 KLF9 KPNA3 LTBP1 MEOX2 MGC2749 MKKS MKL2 MLLT2 MPHOSPH10 NDRG2 NDUFV2 NEBL NFX1 NRP2 NRXN1 NUCKS NUP160 OSBPL7 P53AIP1 PEX16 PHF20L1 PIK3R1 PPP1R3A PPP2R3A PRC1 PRL…
179	V$HIF1_Q3: hypoxia induced factor	148	148	1028	1902	14242	-3.36	0	1.53	0.33	ABLIM3 ACO2 AGXT AKAP12 ANK1 ANKRD25 AP2B1 ATP11A ATP2A3 ATP8A2 BCL11A BMP4 BPESC1 BTG3 C18orf1 C20orf111 C20orf67 C6orf106 CASK CAST CDKN2D CEPT1 CGI-12 CLCN3 COL4A1 COL8A2 CSF2RA CSPG5 CTAG1B CTTN CUTL1 DAPK3 DDX18 DELGEF DET1 DIABLO DLX2 DRD4 DRE1 EHD1 EIF3S12 ERF ESRRA F8A1 FBXO31 FCGR2C FLJ10986 FLJ12716 FLJ20618 FMR2 FOXO3A FPGS FYCO1 GAPD GATA3 GEMIN6 GJA5 GPR51 HAPLN2 HBEGF HMG20B HNRPDL …
180	V$AP1_Q4: activator protein 1	897	897	279	12395	3749	-3.36	0	0.4	0.1	AANAT ABAT ABCB1 ABCE1 ABLIM3 ACACA ACO2 ACTL7B ACTN1 ACTR8 ACYP2 ADAM18 ADAM22 ADAM30 ADAMDEC1 ADAMTS6 ADCY2 ADD3 ADH1A ADK ADORA2B AFM AGTR1 AGXT AKAP12 AKAP4 AKR1B1 AKR1C4 ALDH1A2 ALDH3A2 ALDH8A1 ALDOB ALDOC ALG8 ALMS1 AMFR ANK1 ANKHD1 ANKRD25 AP2B1 AP3S1 AP3S2 APBB3 APLP2 APOH ARFRP2 ARG2 ARGBP2 ARHGAP19 ARMCX2 ARNT2 ARSD ASPH ASTN ATF5 ATP11A ATP2A3 ATP2B1 ATP2B2 ATP2B4 ATP5H ATP6V0E ATP6V1D…
181	V$NFKB_Q6: NF-kappaB	198	198	978	2604	13540	-3.38	0	1.29	0.31	13CDNA73 ABAT ACCN1 ACO2 ADAM18 ADAM22 ADAM30 ADARB2 ALPP APLP2 ARG2 ARHGEF2 ATP5H B4GALT6 BHLHB2 BIRC2 BMP4 BZRP C1orf21 C20orf67 C3orf14 C6orf145 C6orf210 C6orf62 C7orf28A C9orf36 CASP4 CAST CD40 CDIPT CHD3 CNR1 COBLL1 CPT2 CREBBP CSF1 CSF2 CSF2RB CSNK2A2 CTBP1 CTPS2 CYP19A1 DDC DDX28 DHFR DIABLO DKFZP586M1120 DLG1 DLGAP4 DNCH1 DOCK4 DPF3 DUSP10 ECM2 EHD1 F8A1 F9 FBN2 FCAR FCGR2C FLJ10986 FLJ12…
182	V$PAX3_B: Pax-3 binding sites	837	837	339	11486	4658	-3.39	0	0.68	0.21	ABAT ABCE1 ABLIM3 ACACA ACAD8 ACCN1 ACO2 ACSL6 ACTL7B ADAM18 ADAM22 ADAM30 ADAMDEC1 ADAMTS6 ADD3 ADK ADORA2B AFM AGTR1 AGXT AKAP12 AKAP4 ALDH3A2 ALDH8A1 ALDOB ALDOC ALG8 ALMS1 AMFR ANK1 ANKHD1 ANP32B AP2B1 AP3S1 AP3S2 APBB3 APLP2 ARF5 ARG2 ARHGAP19 ARMCX2 ARSD ASPH ATP11A ATP2A3 ATP5C1 ATP5E ATP5H ATP6V0E ATP6V1D ATP8A2 ATR ATRN B3GALT2 B4GALT6 BATF BBS4 BBS7 BCAP29 BCL11A BCL11B BCL2 BGR BHLHB2 …
183	V$MTF1_Q4	141	141	1035	1809	14335	-3.39	0	1.52	0.33	ADAM22 ANKRD25 ARF6 ARHGAP19 ATF5 ATP11A ATP2A3 BAI2 BMP4 C11orf9 C16orf33 C1orf21 C1orf41 C20orf18 C20orf19 C4orf8 C6orf106 CA11 CASP5 CD200 CD72 CDC42EP4 CDH1 CDKN2D CGI-30 CLN8 CNNM1 COBLL1 CRIM1 CRYZ CSF2 CSF2RA CSNK2A2 CTDSPL CTPS2 DALRD3 DKFZP564J0123 DKFZp547K1113 DLX2 DOK4 DSP EFHC2 EFNB2 ELK3 FAF1 FAM53B FBXO31 FLJ14146 FLJ20323 FLJ23420 FXYD6 FZR1 GAN GAPD GATA2 GLUL GNB1L GOT2 GPATC3 H…
184	V$AMEF2_Q6: myocyte enhancer factor	126	126	1050	1602	14542	-3.4	0	1.59	0.33	ACAD8 ACSL6 ADARB2 ADD3 ADK AP3S2 ARF5 ARFRP2 ARSD ASPH AVPR1A B3GALT2 BAI3 BCAP29 BPI C21orf2 C5orf4 C6orf210 CA1 CAMK1G CAST CCL20 CDIPT CFLAR CHAF1A CHD2 CHD3 CLEC7A COL11A2 COLQ DEC1 DHRS9 DJ462O23.2 DKFZP564J0123 DMD DNTT ECH1 EFHC2 EIF5B ELK3 EVI1 F9 FAM53B FCN1 FETUB FLJ11767 FLJ13955 FPGS GADD45GIP1 GCNT3 GEMIN6 GLRA3 GLUD2 HBEGF HBG1 HIST1H1C HMGN3 HNRPA3 HNRPDL IFNAR2 IL12B ING3 INSL5 K…
185	V$EVI1_02: ectopic viral integration site 1 encoded factor	32	32	1144	335	15809	-3.4	0	2.44	0.35	ADAM18 ADAMDEC1 ALDH8A1 APOH BAI3 BMP4 BPI C6orf106 C6orf162 CD1B CDC27 CHRNA9 CLDN10 COL21A1 CSNK1G3 DDX28 ENTPD3 FKBP8 GNB1L GRM5 KLHL20 KLRA1 NPAT NRXN1 PTMS RAB38 RAP140 RGS5 RGS7 SYNCRIP TIA1 ZNF305
186	V$COREBINDINGFACTOR_Q6	303	303	873	4152	11992	-3.41	0	0.7	0.21	13CDNA73 ABCE1 ACACA ACCN1 ACYP2 ADAM18 ADAM22 ADAMDEC1 AFM AGTR1 AGXT AKAP12 AKR1B1 ALDOC ALPP ANKHD1 AP3S2 ARF3 ARG2 ASPH ATP11A ATP5C1 ATP5E ATP8A2 AVPR1A B3GALT2 BATF BGR BIRC2 BMP4 BMX BPESC1 BPI BRD1 C18orf1 C21orf62 C3orf14 C4orf9 C5orf4 C6orf109 C6orf210 C6orf32 C6orf62 C7orf28A C9orf36 CA11 CAMP CASP5 CAST CCDC6 CCIN CCL22 CD1B CD44 CDC34 CDH10 CENTG1 CFHL2 CFLAR CGI-30 CHRNA1 CHRNB3 CLC…
187	V$AP4_01: activator protein 4	126	126	1050	1606	14538	-3.42	0	1.55	0.33	ACTR8 ANK1 ARFRP2 ARG2 ASTN ATP2B2 B4GALT6 BIRC2 C14orf1 C1QDC1 CAP350 CASP4 CD40 CDC34 CHKB CHRNA9 CMKLR1 CNOT6 COAS2 COL5A2 COX6A1 CSE1L CTBP1 CTPS2 CTTN CYP19A1 CYP3A4 CYP3A7 DIABLO DKFZP564J0123 DNAI2 DOK4 DR1 DRE1 E2F3 ECM2 EIF5 EMR2 ERF EWSR1 F8A1 FAM50A FBXW7 FCGR2C FKBP3 FLJ12716 FLJ13646 FLJ13725 FN1 FPGS FXYD6 FZR1 GNAS GNB1L GPRC5C HAPLN2 HMGN4 HPCA HRMT1L1 HTR2A ICAM4 IGSF4C ITM2A JMJ…
188	V$GATA2_03: GATA-binding factor 2	298	298	878	4099	12045	-3.42	0	0.64	0.2	13CDNA73 ABCB1 ABCE1 ACACA ACTR8 ADAM22 ADAM30 ADAMDEC1 ADAMTS6 ADD3 ADORA2B AFM AGTR1 AGXT AKAP12 AKAP4 ALDH1A2 ALG8 AP2B1 APOH ARF6 ARG2 ARGBP2 ARHGAP19 ARSD ASPH ASTN ATP2B1 ATP5H B3GALT2 B4GALT5 BAHD1 BATF BCL11B BMP4 BMX BPI BRAP C11orf9 C20orf111 C20orf67 C21orf2 C6orf106 C6orf162 C6orf210 C9orf36 CACNG3 CAMK1G CAMKK2 CAP350 CASP5 CAST CD1B CDC27 CDH10 CDIPT CDK7 CENPE CESK1 CGA CLCN3 CLTA …
189	V$TGIF_01: TGIF (5'TG3' interacting factor)	260	260	916	3632	12512	-3.42	0	0.46	0.11	13CDNA73 ABCB1 ABCE1 ACTR8 ADAMDEC1 ADD3 ADH1A AFM AKAP4 ALDH1A2 ALMS1 ANK1 ANKRD25 ARHGAP19 ARMCX2 ASPH ATP5E ATP8A2 BAI3 BPESC1 BTN2A2 C14orf114 C18orf1 C21orf62 C4orf9 CACNG3 CASP4 CAST CCL20 CCND3 CDC14B CDH10 CDK7 CESK1 CFLAR CGI-30 CHAF1A CHRDL1 CHRNA1 CHRNB3 CLCNKB CLDN10 CLIC5 COAS2 COL11A2 COLQ COPZ2 COX7C CRP CSF2 CSF2RB CSH2 CSNK2A2 CTBP1 CTBP2 CYP19A1 CYP3A4 CYP3A7 D2LIC DCLRE1A DDC D…
190	V$E2_Q6: papilloma virus regulator E2	142	142	1034	1831	14313	-3.42	0	1.45	0.32	ACO2 ADD3 AGTR1 AKAP12 ALMS1 APBB3 ARHGAP19 ARSD BBS4 BBS7 BHLHB2 C20orf111 C21orf2 C4orf9 CD40 CDC14B CDC34 CDH11 CGGBP1 CLIPR-59 COL4A1 COMT CSF2RB CTBP2 DALRD3 DHFR DKFZP434A0131 DLG1 DMD DR1 DSP DUSP10 E2F3 EFS FAM50A FKBP3 FLJ22222 FN1 FOXO3A FRAT1 GCH1 GEMIN6 GNAZ GPC4 GPM6A GPRC5C GRAP HCNGP HLA-B IGF2 ILT7 INADL IRF8 ITGB4 ITPR2 JMJD2B KCNA5 KCNAB1 KCND1 KIAA1012 KPNA1 KPNA3 KRTAP5-9 LERE…
191	V$CREL_01: c-Rel	910	910	266	12529	3615	-3.45	0	0.53	0.14	13CDNA73 AANAT ABAT ABCE1 ABLIM3 ACACA ACCN1 ACO2 ACSL6 ACTL7B ACTN1 ACTR8 ADAM18 ADAM30 ADAMTS6 ADARB2 ADCY2 ADD3 ADK AGTR1 AGXT AKAP12 AKR1B1 ALDH1A2 ALDH3A2 ALDOB ALDOC ALMS1 ALPP AMFR ANK1 ANKHD1 ANKRD25 ANP32B AP3S1 AP3S2 APBB3 APLP2 ARF3 ARF6 ARFRP2 ARGBP2 ARHGAP19 ARHGEF2 ARMCX2 ARNT2 ASPH ASTN ATP11A ATP2A3 ATP2B1 ATP2B2 ATP2B4 ATP5E ATP5H ATP6V1D ATP8A2 ATR ATRN B4GALT5 B4GALT6 BAHD1 BAI…
192	V$ELK1_02: Elk-1	994	994	182	13546	2598	-3.45	0	1.19	0.3	13CDNA73 AANAT ABAT ABCB1 ABCE1 ABLIM3 ACACA ACAD8 ACCN1 ACO2 ACSL6 ACTL7B ACTN1 ACTR8 ACYP2 ADAM18 ADAM22 ADAM30 ADAMTS6 ADARB2 ADCY2 ADD3 ADK ADORA2B AGTR1 AGXT AKAP12 AKAP4 AKR1B1 ALDH1A2 ALDH3A2 ALDH8A1 ALDOB ALDOC ALG8 ALMS1 ALPP AMFR ANK1 ANKHD1 ANKRD25 ANP32B AP3S1 AP3S2 APBB3 APLP2 APOH ARF3 ARF5 ARF6 ARFRP2 ARG2 ARGBP2 ARHGAP19 ARHGEF2 ARSD ASPH ASTN ATF5 ATP11A ATP2A3 ATP2B1 ATP2B2 ATP2…
193	V$LPOLYA_B: Lentiviral Poly A signal	222	222	954	3121	13023	-3.45	0	0.41	0.1	ABCE1 ACCN1 ACYP2 ADAM18 ADAM22 ADARB2 ADD3 ADH1A AGTR1 AGXT AKR1C4 ALDH1A2 ALDOC AP3S1 ARF3 ARHGAP19 ARMCX2 ASPH ATP5E B3GALT2 BAI3 BATF BBS7 BCAP29 BCL11B BCL2 BGR BMX BTN2A2 C10orf76 C16orf33 C17orf25 C20orf18 C22orf3 C6orf106 C6orf210 C6orf62 CD1B CD40 CDC34 CDIPT CDK7 CDKN2D CFLAR CGA CHD3 CHRDL1 CHRNA9 CLEC7A CLIC5 COX6A1 COX7C CRYM CSE1L CSF1 CSNK1G3 CTAGE5 CTBP2 Cep192 DELGEF DET1 DHRS9 D…
194	V$STAF_02: Se-Cys tRNA gene transcription activating factor	243	243	933	3396	12748	-3.45	0	0.46	0.11	ACAD8 ACCN1 ADAM18 ADAM30 ADAMTS6 ADCY2 AGTR1 ALPP AMFR AP3S2 ARFRP2 ARGBP2 ATP2B2 ATRN BAI2 BCAP29 BGR BIRC2 BPI BTN2A2 C11orf9 C14orf1 C1orf41 C20orf19 C20orf67 C4orf8 C4orf9 C7orf28A CACNG3 CAPZA1 CASP4 CASP8AP2 CAST CCND3 CD40 CD44 CD79B CDC2L6 CDIPT CHD3 CHRDL1 CHRNA9 CHRNB3 CLDN10 CLST11240 CNOT1 COMT COX7C CSF1 CSNK1A1 CTAG1B CTTN Cep192 D2LIC DALRD3 DDX1 DHFR DKFZP434H132 DKFZP564J0123 DK…
195	V$AP1_C: AP-1 binding site	191	191	985	2713	13431	-3.46	0	0.35	0.09	ADAM18 ADAM30 ADAMDEC1 ADD3 AGTR1 AKR1B1 ALDH3A2 ALMS1 ANK1 AP2B1 AP3S1 APOH ARFRP2 ARHGAP19 ARSD ATF5 ATP6V1D ATRN AVPR1A B4GALT5 BAHD1 BHLHB2 C10orf76 C14orf114 C6orf145 C6orf162 C6orf32 CADPS2 CAMKK2 CCND3 CD68 CDC14B CDH1 CDK7 CDKN2D CHKB CLCNKB CLEC7A CLIC5 COL5A2 COLQ COPZ2 COX6A1 CREBBP CSF1 CSF2RA CSH2 CSPG3 CST1 CTAGE5 CTPS2 CTTN CYP19A1 CYP26B1 DCLRE1A DIO2 DKFZP434H132 DLG5 DMD DOK4 DR…
196	V$AREB6_01: AREB6 (Atp1a1 regulatory element binding factor 6)	233	233	943	3254	12890	-3.46	0	0.47	0.11	13CDNA73 ABAT ABCB1 ACACA ACO2 ACTL7B ADAM22 ADD3 ADH1A ADK AGTR1 AKAP12 ALDOC ANKRD25 AP2B1 ARF5 ARG2 ATP5E ATP6V1D BZRAP1 C14orf1 C18orf1 C1orf41 C20orf19 C20orf67 C4orf8 CACNG3 CALM1 CAST CD79B CGI-12 CHRDL1 CHRNA1 CHRNB3 CLCNKB CLN8 CNAP1 CNOT1 COL21A1 COL5A2 CPT2 CREBBP CRP CRYM CSF2 CSGlcA-T CSH2 CTAGE5 DDAH2 DDX1 DDX18 DDX28 DET1 DHX9 DMD DNCI2 DOK4 ECH1 EIF2AK1 EIF3S12 EIF5B ELF3 ENTPD3 E…
197	V$AR_Q2: androgen receptor	33	33	1143	571	15573	-3.47	0	0.08	0.04	ACACA ANK1 ARF3 ATP2A3 BMX CAMKK2 CAST CD72 CNR1 DDC FBXW7 FLJ13646 FLJ20345 FYCO1 GJB5 GSTA3 HLA-DQA1 HLA-DQB2 HTR2A INHBA JPH2 KLK3 MRPS11 PCDHGA10 PHF20L1 PIK3R1 PPARD PPP1R3A PUM2 SCYL2 SMOX SPATA5L1 VNN2
198	V$STAT5A_02	174	174	1002	2485	13659	-3.47	0	0.33	0.08	ABAT ACAD8 ACO2 ACTN1 ACTR8 ADAMTS6 AKAP12 AKR1B1 AP2B1 ARFRP2 ARNT2 ASPH ASTN AVPR1A BBS7 BCAP29 BCL2 BZRP C3orf14 C6orf62 C9orf36 CASP5 CAST CD40 CD68 CHRNA9 CLCN3 CLDN10 CLEC7A CNOT1 CRYM CSF2RA CSH2 CTAGE5 CTPS2 D2LIC DAZAP2 DHRS9 DHX9 DMD DR1 DSP DUSP10 EIF2AK1 EMR2 F8A1 F9 FADS1 FAM50A FBXW7 FLJ00060 FLJ10618 FLJ12716 FLJ14146 FLJ22573 FLJ36754 FLNC FN1 FOLH1 FSD1 GABRA5 GALGT GJA5 GLUD1 GN…
199	V$DR3_Q4: direct repeat 3	168	168	1008	2402	13742	-3.48	0	0.33	0.08	AANAT ACAD8 ADAMTS6 ADH1A ALDOC ANKRD25 ARF6 ARGBP2 ARHGEF2 ATP2B2 BAI2 BRD1 C11orf9 C17orf25 C20orf111 C3orf14 C4orf8 C6orf109 C6orf145 CAMP CCL22 CD68 CDH1 CDK5R1 CESK1 CGI-12 CHRNA1 CLCNKB CLN8 COMT COX4I1 COX6A1 CR1 CSE1L CSF2RA CSF2RB CTAG1B CTBP1 CTDSPL CTPS2 CUTL1 CYP19A1 DDAH2 DDX1 DEC1 DKFZP434A0131 DLEC1 DNAI2 DUSP10 E2F3 ECH1 EDF1 ENTPD3 EPHA2 ETFA FAM32A FBXW7 FCGR2C FETUB FLJ00060 FL…
200	V$E2F_Q6: E2F	994	994	182	13558	2586	-3.49	0	1.11	0.3	ABAT ABCB1 ABCE1 ABLIM3 ACACA ACAD8 ACCN1 ACO2 ACSL6 ACTN1 ACTR8 ACYP2 ADAM22 ADAM30 ADAMDEC1 ADAMTS6 ADARB2 ADCY2 ADD3 ADK ADORA2B AFM AGTR1 AKAP12 AKAP4 AKR1B1 ALDH1A2 ALDH3A2 ALDH8A1 ALDOC ALG8 ALMS1 ALPP AMFR ANK1 ANKHD1 ANKRD25 ANP32B AP2B1 AP3S2 APLP2 ARF3 ARF5 ARF6 ARFRP2 ARG2 ARGBP2 ARHGAP19 ARHGEF2 ARNT2 ASPH ASTN ATF5 ATP11A ATP2A3 ATP2B1 ATP2B2 ATP2B4 ATP5C1 ATP5E ATP5H ATP6V0E ATP6V1D…
201	V$NFKAPPAB_01: NF-kappaB	211	211	965	2961	13183	-3.49	0	0.44	0.11	13CDNA73 ACCN1 ACO2 ADAM18 ADAM30 ADAMDEC1 ADARB2 ALPP ANP32B APLP2 ATP5H BAI2 BATF BHLHB2 BIRC2 BMP4 BZRP C11orf9 C1orf21 C3orf14 C4orf8 C6orf145 C6orf62 C7orf28A CAPZA1 CASP4 CAST CCL20 CD40 CDC27 CDIPT CEPT1 CHD3 CHRNA1 CNOT1 CNR1 COL11A2 COMT COPZ2 CPT2 CSF1 CSF2RB CTBP1 CTPS2 CYP19A1 DIABLO DKFZP434H132 DKFZP586M1120 DLG5 DLGAP4 DNAI2 DNAJA4 DNCH1 DOCK4 DOK4 DPF3 DUSP10 EGR1 EHD1 ELF3 FBN2 F…
202	V$TANTIGEN_B: Major T-antigen binding sites	62	62	1114	737	15407	-3.49	0	1.91	0.33	ACTL7B ACYP2 ADD3 ATR C4orf8 C7orf28A CAMKK2 CD40 CDKN2D CLST11240 CNR1 CSF2RA DALRD3 DDX1 DDX28 DHX32 DKFZP564J0123 DNAI2 DNCI2 DR1 ECH1 EFHC2 ELF3 ELOVL2 EMR2 FLJ13646 FLJ23420 FLT3LG FRAT1 FXR2 GMPR H2AFX HAPLN2 HIC HSA9761 IER2 INSL5 ITGB1 ITSN2 LOC152185 LSM5 MAPK1 MMP11 MYT1L NET-5 NFATC2IP PI4KII PIK3R4 PPP1R12B PSCD1 PTK6 PTPN11 RBM5 RBX1 RENBP RGN SLC12A9 SLC8A2 SPFH2 ST6GALNAC4 TP53I3 T…
203	V$XFD2_01: Xenopus fork head domain factor 2	228	228	948	3148	12996	-3.51	0	0.6	0.18	ABAT ABCE1 ABLIM3 ACACA ACAD8 ACCN1 ADAMDEC1 ADAMTS6 AFM AGTR1 AKR1C4 ALDH1A2 ALDOB ALMS1 ARF5 ARMCX2 ASPH ASTN ATP2B1 ATP2B4 ATR AVPR1A BBS7 BPI C14orf114 C18orf1 C20orf19 C5orf4 C6orf109 C9orf36 CALM3 CASP4 CAST CD200 CD44 CDH10 CDKN2D CENPE CEPT1 CGA CHAF1A CHD3 CHRDL1 CLDN10 CLEC7A CLIC5 CLN8 COL5A2 COX7C CRYZ CSGlcA-T CTAGE5 CTBP2 CYP26B1 CYP3A4 CYP3A7 Cep192 DDC DET1 DHFR DHRS9 DLEC1 DMD DN…
204	V$NKX3A_01: NK class homeobox factor 3A	187	187	989	2499	13645	-3.52	0	1.01	0.24	13CDNA73 ABCB1 ABCE1 ACAD8 ADARB2 ADD3 AFM AKAP12 ALDH1A2 ANP32B APBB3 ARG2 ARGBP2 ASTN ATP2B1 ATP2B4 ATP5C1 ATP6V0E B3GALT2 BBS4 BCL2 BMX BTN2A2 C20orf18 C6orf106 C6orf162 C6orf210 C9orf36 CAP350 CASP4 CASP5 CDC27 CDH10 CDK5R1 CEPT1 CHD2 CLIC5 CLTA CNAP1 COAS2 COLQ CSE1L CSF2RA CSNK1G3 CTAGE5 Cep192 DDAH2 DDX18 DDX28 DEC1 DHFR DHRS9 DLG1 DLG5 DLX2 DMD DNCI2 ENSA FCGR2C FETUB FLJ10618 FLJ11767 FL…
205	V$AML_Q6	210	210	966	2842	13302	-3.53	0	0.85	0.23	13CDNA73 ABCE1 ACYP2 ADAM22 ADAMDEC1 AGTR1 AGXT AKR1B1 ALDOC ARF3 ASPH ATP5C1 ATP5E ATP8A2 B3GALT2 BATF BGR BIRC2 BMP4 BMX BPESC1 BPI BRD1 C21orf62 C5orf4 C6orf210 C6orf32 C6orf62 C7orf28A CASP5 CCIN CD44 CFHL2 CFLAR CGI-30 CHRNA1 CHRNB3 CLCN3 CLCNKB CLDN10 CMKLR1 CNR1 COG2 COLQ COMT CPNE3 CPT2 CR1 CREBBP CSF1 CSF2 CSF2RA CSPG3 CTAGE5 CTTN Cep192 D2LIC DAZAP2 DCLRE1A DDC DHRS9 DLEC1 DLG5 DLGAP2 D…
206	V$ATF_B: ATF binding site	52	52	1124	607	15537	-3.54	0	1.94	0.33	ABCE1 ADAMTS6 ADK AP2B1 ARG2 BBS7 BIRC2 C17orf25 C18orf1 C3orf14 CDC14B CDIPT CENPE CGA CLCN3 CNDP2 DIO2 DKFZP434A0131 EPHA2 FADS1 FAM50A FLJ10618 FN1 FRAT1 GABBR1 HS3ST2 IL10RA KCNA5 LDHA LTBP1 MCAM N4BP1 NDUFA10 NEUROD6 NID NOLC1 NUP214 NUP98 PEG3 PPP2CA PRC1 RNASE2 RNPS1 SCYL2 SNRK SPAG6 SST THADA TRIP6 YWHAZ ZDHHC17 ZF
207	V$AIRE_01	198	198	978	2729	13415	-3.57	0	0.62	0.2	ABAT ACACA ADAM18 ADK AKAP12 ALDOB ALMS1 AP3S1 ASPH ASTN ATF5 ATP6V1D ATP8A2 ATR AVPR1A BCAP29 BCL11B C10orf76 C1S C6orf162 C6orf62 CA1 CAPZA1 CAST CCDC6 CCIN CDC42EP4 CDH10 CEPT1 CFHL2 CFLAR CGI-30 CLCNKB CLDN10 CLEC7A CMKLR1 CNAP1 CNR1 COPZ2 CRYM CRYZ CSNK1G3 CSPG3 DEC1 DHFR DHRS9 DHX9 DKFZP434A0131 DLEC1 DLG1 DMD DMN DNAJA4 DOCK4 EFHC2 EIF3S9 ELK3 ENSA ENTPD3 F9 FBXO3 FCGR2C FCN1 FGFR1 FKBP3 F…
208	V$SREBP1_01: sterol regulatory element-binding protein 1	134	134	1042	1930	14214	-3.58	0	0.31	0.07	ACYP2 ALG8 ANKRD25 AP2B1 ARF5 ARFRP2 ARGBP2 ARMCX2 ATP6V0E C16orf33 C17orf25 C18orf1 C20orf67 C4orf8 C5orf4 CAMKK2 CAMP CASP8AP2 CAST CDH1 CDK7 CENPE CGA CHAF1A CHD2 CNOT1 CNR1 COL8A2 COX6B1 CTBP2 CTPS2 DALRD3 DDX28 DHX32 DKFZP564J0123 DKFZP586M1120 DLX2 DMN DNAI2 DNCI2 ECH1 EDF1 EIF2AK1 EIF5 ENSA FDFT1 FLJ10618 FLJ10925 FLJ20345 FLJ23420 FLT3LG FMO5 FRAT1 FXR2 GADD45GIP1 GBA GLUD2 GPATC3 HIC HLA…
209	V$CREB_02: cAMP-responsive element binding protein	173	173	1003	2321	13823	-3.58	0	0.94	0.23	AANAT ACCN1 AP2B1 ARF5 ARG2 ARMCX2 ARNT2 ATP11A ATP2B2 B4GALT6 BIRC2 BPESC1 BZRP C11orf9 C18orf1 C20orf67 C3orf14 CABP1 CASP9 CD200 CDC14B CDIPT CENPE CHAF1A CLCN3 CNDP2 CREBBP CSNK1A1 CSPG5 CTAGE5 CTBP1 CTDSPL CUTL1 DALRD3 DAZAP2 DDX18 DKFZP564J0123 DKFZp547K1113 DLGAP2 DLGAP4 DLX2 DMD DPF3 DZIP1 EIF5B EPHA2 ERF FAM50A FBXW7 FGFR1 FGFR1OP FLJ00060 FLJ11767 FLJ13646 FLJ38984 FN1 FOXO1A FRAT1 G6PD…
210	V$GABP_B: GA binding protein	131	131	1045	1889	14255	-3.58	0	0.31	0.07	ACAD8 ACO2 ADAMTS6 ALDH1A2 ALDH3A2 ALG8 AP3S2 APBB3 ATP2A3 ATP6V1D ATR B4GALT6 BCL11A BMX BPI BRAP BTG3 BZRP C16orf33 C20orf18 C21orf2 C3orf14 C7orf28A CASP9 CCDC6 CDK5R1 CEPT1 CHKB COMT COX4I1 COX6A1 CRYZ CSNK1A1 CTDSPL CYBRD1 CYP19A1 DDX18 DELGEF DIABLO DLX2 DOCK4 EDF1 EGR1 EIF2AK1 ELK3 ENTPD3 EPHA2 FAM32A FBXO31 FLJ13154 FLJ20323 FRG1 FZR1 G6PD GLRA3 GPRC5C HMGN4 HRMT1L1 HSPC016 IGF2 IGSF4B IT…
211	V$CREB_01: cAMP-responsive element binding protein	137	137	1039	1801	14343	-3.59	0	1.15	0.3	ABCE1 ACO2 ADAMTS6 ADK ANKHD1 AP2B1 APOH ARF5 ARG2 BBS7 BCAP29 BCL11A BIRC2 C16orf33 C17orf25 C18orf1 C20orf67 C3orf14 C6orf106 CAPZA1 CASP8AP2 CDC14B CDC2L6 CDIPT CENPE CGA CHAF1A CLCN3 CNAP1 CNDP2 CNOT1 COPZ2 CR1 CTAGE5 DIO2 DKFZP434A0131 DLGAP2 DLX2 DMD DNAJA4 EIF5 ENSA EPHA2 ERF FADS1 FAF1 FAM50A FLJ10618 FLJ38984 FN1 FRAT1 GABBR1 GALNT10 GOT2 HBLD2 HCNGP HIST2H4 HMGCR HNRPA3 HS3ST2 HSA9761 I…
212	V$YY1_02: Yin and Yang 1	122	122	1054	1767	14377	-3.6	0	0.3	0.07	ABCE1 ACTR8 ADK AP3S1 APBB3 ASPH ATP5H BAI2 BCL11B C17orf25 C20orf67 C5orf4 C6orf109 CABP1 CAP350 CAPZA1 CD79B CDK7 CGGBP1 CHD3 CLIC5 CLST11240 CNAP1 CNNM1 CNOT6 CNR1 COG2 COL8A2 CREBBP CSNK1A1 CUTL1 CYP3A7 DET1 DHFR ECH1 EIF5 ENSA EPB49 FBXO3 FGFR1OP FLJ11767 FLJ13646 FLJ20323 FOXO3A GADD45GIP1 GCAT GIT2 GPATC3 HCNGP HLA-DPA1 HLA-DQB2 HRMT1L1 IER2 ITGB1 KPNA3 LGALS9 LTBP1 LUZP4 MAP2K3 MAT2A MKKS…
213	V$GATA1_05: GATA-binding factor 1	169	169	1007	2272	13872	-3.6	0	0.91	0.23	ABAT ABCB1 ACACA ACAD8 ACTR8 ADAM30 AGTR1 AKAP4 AKR1C4 ALDH1A2 ALG8 AP2B1 APLP2 ARGBP2 ARHGAP19 ASTN ATP5H ATRN B4GALT5 BAI3 BRAP C1S C21orf2 C9orf36 CACNG3 CAMK1G CASP4 CAST CD72 CDH10 CDK7 CESK1 CMKLR1 CNOT1 COX7C CPT2 CREBBP CRYM CSNK1G3 CTAGE5 CTTN CYP3A4 DDX18 DEC1 DET1 DHX32 DHX9 DIO2 DLG5 DMD DPF3 EHD1 ENTPD3 ERF ETFA EVI1 FDFT1 FETUB FGFR1 FLJ10521 FLJ13646 FLJ20618 FLJ22222 FLJ38984 FMO5…
214	V$COUP_01: COUP:HNF-4 heterodimer	149	149	1027	1978	14166	-3.6	0	1.05	0.26	ABCE1 ADAM22 ADD3 AKAP12 AKR1C4 ALDOB ARG2 ASTN ATP11A ATP2B1 ATP5E B3GALT2 BAI2 BRAP C5orf4 C6orf109 C6orf210 CACNG3 CCDC6 CCL20 CCND3 CD79B CDC34 CDKN2D CFHL2 CGI-30 CNR1 COL8A2 COMT CRP CSF2 CSNK1A1 DDX52 DIO2 DKFZP434H132 DPF3 DRD4 ECM2 EIF4E2 EPB49 ETFA FLJ10521 FLJ38984 FTL GABRA5 GCH1 GLUL GNB1L GPR17 GPRC5C HLA-B HLA-DPA1 HLA-DQB2 HRMT1L1 HS322B1A HSPC016 HTR2A ICA1 IER2 IFI27 IL9R ITGB1 …
215	V$PAX_Q6	1123	1123	53	15518	626	-3.62	0	0.13	0.04	13CDNA73 AANAT ABAT ABCB1 ABCE1 ABLIM3 ACACA ACAD8 ACCN1 ACO2 ACSL6 ACTN1 ACTR8 ACYP2 ADAM18 ADAM22 ADAM30 ADAMDEC1 ADAMTS6 ADARB2 ADD3 ADH1A ADK ADORA2B AFM AGTR1 AGXT AKAP12 AKAP4 AKR1B1 AKR1C4 ALDH1A2 ALDH3A2 ALDH8A1 ALDOB ALDOC ALG8 ALPP AMFR ANK1 ANKHD1 ANKRD25 AP2B1 AP3S1 AP3S2 APBB3 APLP2 APOH ARF3 ARF5 ARF6 ARFRP2 ARG2 ARGBP2 ARHGAP19 ARHGEF2 ARMCX2 ARNT2 ARSD ASPH ASTN ATF5 ATP11A ATP2A3…
216	V$ARP1_01: apolipoprotein AI regulatory protein 1	166	166	1010	2252	13892	-3.63	0	0.8	0.22	ABAT ACTL7B ACYP2 ADORA2B AFM ANKRD25 ARF6 ARHGAP19 ARMCX2 ATP6V1D ATRN BAHD1 BCAP29 BGR C18orf1 C1orf21 C20orf67 C4orf8 C7orf28A CAMKK2 CCL22 CCND3 CD200 CD44 CDC34 CDC42EP4 CDKN2D CHRDL1 CHRNA9 CHRNB3 CLCNKB CLIPR-59 CLST11240 COL21A1 COX6B1 CPNE3 CSNK1A1 CSNK1G3 CTDSPL DEC1 DHFR DKFZP434A0131 DNAI2 DOK4 ECH1 ELF3 ELOVL2 EMR2 FAM32A FCAR FCN1 FLJ00060 FLJ10925 FLJ13197 FLJ13725 FLJ22573 FXR2 FX…
217	V$HFH8_01: HNF-3/Fkh Homolog-8	147	147	1029	1961	14183	-3.63	0	0.98	0.24	13CDNA73 ABCE1 ACACA ACAD8 ACCN1 ADAMTS6 AGTR1 ALDH1A2 ALDOB ARMCX2 ASPH ATP2B1 ATP2B4 AVPR1A BBS7 BRAP C14orf114 C20orf19 C5orf4 C6orf109 CALM3 CASP4 CAST CD1B CD200 CDH10 CENPE CEPT1 CGA CHD3 CHRDL1 CLEC7A CLIC5 CLN8 CRYZ CTAGE5 CYP26B1 CYP3A4 CYP3A7 Cep192 DDC DET1 DHFR DHRS9 DMD EDF1 ESR1 EVI1 F9 FCAR FLJ10618 FLJ13197 FLJ22222 FMO5 FOXO3A FRAT1 FRG1 GBA GDAP1L1 GLRA3 GLUL GNAS GPM6A GRIK3 GT…
218	V$SRF_Q4	89	89	1087	1319	14825	-3.64	0	0.25	0.07	ADAM22 ADD3 ADK AKAP12 ANKRD25 ATP2A3 ATP5C1 ATRN BICD2 C18orf1 C1S C6orf162 CAST CD40 CDIPT CLTA CNR1 COMT COX4I1 COX7C CPT2 CSF2RA CTBP2 CYP19A1 DDX18 DET1 DKFZP434H132 DNAJA4 EGR1 EHD1 ENTPD3 FLJ12606 GABRQ GCH1 GCLC GJA5 GOT2 GPRC5C GRIA2 HBB HS322B1A IFI27 IGSF6 IL15 IQSEC1 KCNAB1 KDELR3 KPNA3 LEREPO4 LHCGR LRP10 MACF1 MCAM MCL1 MCM3AP MED6 MLLT2 MMP11 MYO5C NT5E PFDN1 POLR1D PP1201 PPP2CA P…
219	V$AHRARNT_01: aryl hydrocarbon receptor:Arnt heterodimers	107	107	1069	1385	14759	-3.66	0	1.26	0.31	ACCN1 ACO2 ADAMTS6 ANK1 AP3S1 APLP2 ATP11A ATP6V1D BZRP C17orf25 C6orf109 CDC14B CDC27 CDIPT CDKN2D CLDN10 CNAP1 CNOT6 COLQ COX6B1 CRYM CSNK2A2 CST1 CTAGE5 DLGAP4 EIF3S9 FGFR1OP FLJ11767 FLT3LG FPGS GATA3 GNAS GPRC5C GRIA2 HLX1 HMGN3 HRMT1L1 IFIH1 IL10RA KCNAB2 KIF13B LEREPO4 LPHN1 LPHN3 LUC7L2 LYPDC1 MARCH6 MBTD1 MCTP1 MED25 MEOX2 MET MGC23401 MGC24381 MT1H NFATC2IP NPAS1 NPAS2 NRG1 NTRK3 NUFIP1…
220	V$OCT_C: Octamer binding site	77	77	1099	962	15182	-3.67	0	1.5	0.33	ADAMTS6 ALMS1 APBB3 ARGBP2 ARHGAP19 CA1 CAMP CENTG1 CGA CLST11240 CSF2RA DET1 DLGAP2 DLGAP4 DMD DNTT E2F3 EIF3S12 ESRRA ETV1 F8A1 FAF1 FOLH1 GALNT10 GPC5 GPM6A HLA-DPA1 HP ICA1 IL15 ITGB5 KIAA0774 KIR2DL5 KYNU LPPR2 MAPK1 MGC10471 MGC5297 MLSTD1 MT1F MT1H MT1X MYCN MYT1L NEBL NRIP2 NRXN1 NT5E PAK3 PAX6 PIP5K2C PPP1R12B PPP2R3A PRDM2 PRKCB1 RANBP9 RBL1 RFXAP RTN1 SCIRP10 SCN3A SFRS7 SHB SLC25A12 S…
221	V$ATF1_Q6	85	85	1091	1261	14883	-3.67	0	0.25	0.07	ABCE1 ACTL7B ADAMTS6 ADK AP2B1 APOH ARG2 BCL11A BICD2 BIRC2 C14orf1 C17orf25 C18orf1 C20orf111 C3orf14 C6orf106 CAMKK2 CDC14B CDC2L6 CENPE CGA CHAF1A CLCN3 CNOT1 DIO2 DKFZP434A0131 DKFZp547K1113 ERF FAM50A FLJ13955 FN1 FPGS GABBR1 GALNT10 HBLD2 HIST2H4 HNRPA3 HSA9761 IFNAR2 IL10RA KCNA5 KCTD15 KIAA0143 KIAA1012 KIF13B LDHA LILRB6 LOC152185 LTBP1 MAOA MASP2 MCAM MTF1 NDUFA10 NEBL NEUROD6 NID NOLC1…
222	V$OCT1_Q6: octamer factor 1	1037	1037	139	14285	1859	-3.68	0	0.44	0.11	13CDNA73 ABAT ABCB1 ABCE1 ABLIM3 ACACA ACAD8 ACCN1 ACO2 ACSL6 ACTL7B ACTN1 ACTR8 ACYP2 ADAM18 ADAM30 ADAMDEC1 ADAMTS6 ADARB2 ADD3 ADH1A ADK ADORA2B AFM AGTR1 AGXT AKAP12 AKAP4 AKR1B1 AKR1C4 ALDH1A2 ALDH3A2 ALDH8A1 ALDOB ALDOC ALG8 ALMS1 ANK1 ANKRD25 ANP32B AP2B1 AP3S1 AP3S2 APBB3 APOH ARF3 ARF5 ARF6 ARFRP2 ARG2 ARGBP2 ARHGAP19 ARMCX2 ARNT2 ARSD ASPH ASTN ATF5 ATP11A ATP2B1 ATP2B2 ATP2B4 ATP5C1 AT…
223	V$OLF1_01: olfactory neuron-specific factor	151	151	1025	2064	14080	-3.68	0	0.71	0.21	AANAT ACACA ADD3 AKAP12 ALDH3A2 ANKRD25 ARGBP2 ATP2A3 BHLHB2 BMP4 BRD1 BTN2A2 BZRAP1 C18orf1 C1orf21 C1orf41 C6orf106 CAMP CASP4 CASP8AP2 CCIN CCL22 CD40 CD79B CDK5R1 CHAF1A CHD3 CLTA COLQ COMT CPNE3 CSF1 CSF2 CSPG5 CTAGE5 CTBP2 CUTL1 CYP26B1 DALRD3 DKFZP564J0123 DKFZP586M1120 DLGAP2 DLGAP4 DNAJA4 ECH1 EIF5 ELK3 ETFA FBXW7 FCN1 FGFR3 FLJ38984 FMR2 FTH1 FXYD6 G6PD GALNT10 GATA2 GBA GJA5 GLUL GPR51…
224	V$ISRE_01: interferon-stimulated response element	14	14	1162	282	15862	-3.68	0	0.06	0.04	ALG8 C14orf114 CHRNA1 IFI27 ITGB1 KIAA0276 MAP2K3 PPP2R2B PPP2R3A PTPRR SLC7A11 TRIM26 WT1 ZNF305
225	V$ARNT_01: AhR nuclear translocator homodimers	107	107	1069	1546	14598	-3.69	0	0.33	0.08	ADAM30 ADK AKAP12 ALDOC AMFR ANP32B APBB3 ARF5 ARFRP2 ARMCX2 ASPH BCL11B BHLHB2 BPESC1 C4orf9 C7orf28A CAST CCDC6 CDKN2D CGI-30 CHAF1A CNDP2 CNNM1 COLQ CRP CSF2 CSF2RA CTAGE5 DDX52 DHX32 DKFZP586M1120 DMD EIF3S12 ESRRA FAF1 FLJ10618 FLJ12606 FZR1 HBEGF HERC1 HMG20B HMGN4 HSA9761 HSPC016 KCNAB1 KIAA0179 LOC138046 MAPK1 MARS MAT1A MCL1 MDH2 MGC24381 MKKS NEUROD1 OTUB2 P53AIP1 PADI4 PAK4 PAX6 PCGF2 …
226	V$NKX22_01: NK2 class homeobox factor 2	143	143	1033	1933	14211	-3.69	0	0.82	0.23	13CDNA73 ABCE1 ACTL7B ADAM18 ADAM22 ADD3 ADK AFM AKAP12 AKAP4 ALG8 APOH ARG2 ARGBP2 ASPH ATF5 BCAP29 BICD2 BMX BTG3 C1S CAMKK2 CAP350 CASP4 CASP5 CAST CD44 CEPT1 CGI-30 CLDN10 CLEC7A CLTA COX4I1 CPNE3 CRIM1 CRYZ CSF2RA CSNK1G3 CTAGE5 CTBP2 CYP19A1 CYP3A4 DAZAP2 DCLRE1A DDAH2 DHFR DHRS9 DHX9 DMD DNCI2 DUSP10 ELF3 EMR2 ETFA FADS1 FETUB FKBP3 GABRA5 GALGT GCAT GCLC GIT2 GJB5 GLUD2 GPC5 GPM6A HBLD2 H…
227	V$CDP_01: cut-like homeodomain protein	5	5	1171	141	16003	-3.71	0	0.03	0.02	ALMS1 ARHGAP19 CA1 DNTT PLA2G5
228	V$HNF1_Q6	1085	1085	91	14814	1330	-3.72	0	1.22	0.3	13CDNA73 AANAT ABAT ABCB1 ABCE1 ABLIM3 ACACA ACAD8 ACCN1 ACO2 ACSL6 ACTL7B ACTR8 ACYP2 ADAM18 ADAM22 ADAM30 ADAMDEC1 ADAMTS6 ADARB2 ADD3 ADH1A ADK ADORA2B AFM AGTR1 AGXT AKAP12 AKAP4 AKR1B1 AKR1C4 ALDH1A2 ALDH3A2 ALDH8A1 ALDOB ALDOC ALG8 ALMS1 ALPP AMFR ANK1 ANKHD1 ANKRD25 ANP32B AP2B1 AP3S1 AP3S2 APBB3 APOH ARF3 ARF5 ARF6 ARFRP2 ARG2 ARGBP2 ARHGAP19 ARHGEF2 ARMCX2 ARNT2 ARSD ASPH ASTN ATF5 ATP11…
229	V$CREB_Q4: cAMP-response element binding protein	123	123	1053	1640	14504	-3.72	0	0.95	0.23	ABCE1 ACTN1 ADAMTS6 ADK AP2B1 APOH ARF5 ARG2 B3GALT2 BBS7 BIRC2 BPESC1 C16orf33 C17orf25 C18orf1 C20orf111 C20orf67 C3orf14 C6orf106 CAPZA1 CASP9 CDC14B CENPE CGA CHAF1A CLCN3 CNDP2 CTAGE5 DDX18 DIO2 DKFZP434A0131 DKFZp547K1113 DLX2 DNAJA4 DPF3 EGR1 ENSA EPHA2 ERF FADS1 FAM50A FLJ10618 FLJ13646 FN1 FRAT1 GABBR1 GNAS HBLD2 HMGCR HS3ST2 ICA1 IL10RA IL9R INA KCNA5 KCTD15 KIAA0179 KIF17 KIR2DL5 LDHA …
230	V$NFKAPPAB50_01: NF-kappaB (p50)	91	91	1085	1172	14972	-3.72	0	1.25	0.31	ANP32B ARGBP2 ATP2A3 C18orf1 C4orf8 C6orf62 C9orf36 CA11 CADPS2 CAMKK2 CASP4 CDC2L6 CHKB CHRNA1 CNOT1 COL11A2 COMT CREBBP CSH2 CTBP1 CUTL1 DALRD3 DDAH2 DKFZP564J0123 DNAI2 DRD4 EGR1 ELF3 EPB49 FLJ13646 FLJ20618 FLJ23420 FZD5 HAPLN2 HDGFRP3 HLA-B HLA-DQB2 HLC-8 HS322B1A HSA9761 ICA1 IGFBP5 IGSF4B IL15 IMP4 INADL ING2 KL LTF LYPDC1 MAL MCAM MGC24381 MLLT2 MSX1 MYCPBP NOTCH2 NOTCH2NL NUP160 PADI4 PE…
231	V$NFKB_C: NF-kappaB binding site	56	56	1120	678	15466	-3.73	0	1.63	0.33	APLP2 ARHGEF2 C6orf62 CD40 CHD3 CSF1 DDC DIABLO DLGAP4 EHD1 FBN2 FCAR FLJ20323 GOT2 GPR125 HS322B1A IFIH1 ITSN2 KIAA0992 MAB21L2 MAPBPIP MAT1A MICAL-L2 MSX1 MT1H MYB MYCPBP NFATC1 NOLC1 PCSK2 PPARD PTK6 RAP2C RBL1 RBMS1 RCD-8 RPRM SBLF SKIP SLC35F2 SLC7A11 SORCS3 STAG1 STARD3 STS TEAD1 TNFRSF9 TPMT TRIM31 TRPM3 TSC2 UBE2I USP19 USP46 VCAM1 ZNF305
232	V$ATF3_Q6: activating transcription factor 3	132	132	1044	1808	14336	-3.73	0	0.68	0.21	ABCE1 ADAMTS6 ADARB2 ADK AGTR1 AKAP12 AKAP4 ANK1 AP2B1 ARG2 AVPR1A BBS7 BCAP29 BGR BIRC2 C17orf25 C18orf1 C3orf14 C6orf106 C9orf36 CASP8AP2 CCIN CDC14B CDC2L6 CDC34 CDC42EP4 CENPE CGA CGI-30 CHD3 CLCN3 CNDP2 COAS2 CYBRD1 DEC1 DIO2 DKFZP434A0131 DLGAP2 DNAJA4 DUSP10 ECM2 EHD1 EPHA2 ERF FADS1 FAF1 FAM50A FLJ10521 FLJ10618 FLJ12606 FLJ38984 FN1 FRAT1 FXR2 GABBR1 GALNT10 GATA2 HBLD2 HIST2H4 HOMER3 HS…
233	V$CREB_Q2: cAMP-response element-binding protein	131	131	1045	1807	14337	-3.73	0	0.62	0.2	ANKHD1 AP2B1 APOH ARF5 ARG2 B4GALT6 BAHD1 BBS7 BICD2 BIRC2 BPESC1 C11orf9 C16orf33 C17orf25 C20orf67 C3orf14 C9orf36 CASP9 CDC14B CDIPT CENPE CHAF1A CLCN3 CNDP2 COPZ2 CREBBP CTAGE5 DIABLO DKFZP434A0131 DLX2 DMD EFHC2 EGR1 ENSA EPHA2 ERF FADS1 FAM50A FLJ10618 FLJ13646 FLJ22573 FN1 FPGS FRAT1 FXR2 GABBR1 GNAS GOT2 HCNGP HIC HMGCR HS322B1A HS3ST2 ICA1 IL10RA INA INADL ING3 ITGA6 KCNA5 KIAA1012 KIR2D…
234	V$RREB1_01: Ras-responsive element binding protein 1	109	109	1067	1435	14709	-3.74	0	1.06	0.27	13CDNA73 ACACA ACTN1 ADD3 ANKRD25 ARHGEF2 ATP2A3 BAHD1 C6orf109 CA11 CASK CD40 CDC42EP4 CEPT1 CGGBP1 CHD2 CHD3 CHKB CHRDL1 COBLL1 COL11A2 CSF2RA CSNK2A2 CSPG5 CUTL1 CYP26B1 CYP3A7 DAPK3 DCLRE1A DKFZP564J0123 DMD EFS ERF F8A1 FLJ10847 FLJ20618 FLJ22573 FN1 FPGS FTL GABBR1 GLRA3 GNAS GPC4 GPRC5C HLX1 IGFBP5 IGSF4B IGSF6 IRF2BP1 KCTD15 KIAA0276 LOC51333 LPHN1 LRAT LRP10 LYPDC1 MED6 MGLL MTHFD1 MTSS1…
235	V$E2F1DP1RB_01: Rb:E2F-1:DP-1 trimeric complex	96	96	1080	1249	14895	-3.74	0	1.16	0.3	ACACA ADARB2 ALG8 ANKHD1 AP2B1 ARF6 ARHGEF2 BIRC2 C10orf76 C1orf41 C20orf111 C3orf14 CASP8AP2 CDC14B CHAF1A COBLL1 COL4A1 COX7C CUTL1 DDAH2 DHX9 DJ462O23.2 DRD4 DUSP6 DZIP1 EIF3S12 EIF4E2 ELOVL2 EMR2 ENSA EPHA2 FAM32A FGFR1 FLJ10618 FLJ12716 FLJ13646 FRG1 GALGT GNAZ GPRC5C HIC IDS IFI27 IGF1R IGF2 ING3 IQSEC1 JRK KCND2 KIR2DL5 LPHN1 LUC7L2 MAT2A MEOX2 MKKS MYCN MYCPBP NEFL NEUROD1 NFATC2IP NOTCH2…
236	V$XFD3_01: Xenopus fork head domain factor 3	126	126	1050	1700	14444	-3.74	0	0.83	0.23	ABCB1 ABLIM3 ACYP2 ADAM18 ADH1A AFM ALDOB ARMCX2 ATP2B2 ATP2B4 ATR AVPR1A B3GALT2 BAI3 BBS4 BGR BIRC2 BMX BPI BRAP C6orf32 CASP5 CAST CCL20 CD44 CHAF1A CLDN10 CNOT1 CNR1 COL5A2 CSGlcA-T CSNK1G3 CTTN CYP19A1 DCLRE1A DDX18 DDX52 DMD ELK3 ENTPD3 F9 FAM53B FLJ11767 FLJ12606 FLJ12716 FLJ13955 FLJ36754 FOLH1 FOXO1A FRAT1 GJA5 GLUD2 GPM6A GPR17 HLA-DQB2 HMGCR HSA9761 ICA1 IFI27 IFNAR2 IGSF6 IL15 INSL5 I…
237	V$T3R_01: viral homolog of thyroid hormone receptor alpha1	26	26	1150	451	15693	-3.74	0	0.1	0.04	BCAP29 BPESC1 C6orf106 C6orf145 CESK1 CGI-30 DKFZP434H132 FLJ10521 FLJ20618 GALNT10 HOMER3 KCNQ2 LOC51315 MASP1 MGC10731 MSX1 MVK NCAM1 PCGF2 PSD3 REM1 RGR SERPINA5 SLC4A3 TREX1 WFDC1
238	V$PBX_Q3	1098	1098	78	15149	995	-3.79	0	0.27	0.07	13CDNA73 ABAT ABCB1 ABCE1 ABLIM3 ACACA ACAD8 ACCN1 ACO2 ACTL7B ACTN1 ACTR8 ACYP2 ADAM18 ADAM22 ADAM30 ADAMDEC1 ADAMTS6 ADARB2 ADCY2 ADD3 ADH1A ADK ADORA2B AFM AGTR1 AGXT AKAP12 AKAP4 AKR1B1 AKR1C4 ALDH1A2 ALDH3A2 ALDH8A1 ALDOB ALDOC ALMS1 ALPP AMFR ANK1 ANKHD1 ANKRD25 ANP32B AP2B1 AP3S1 AP3S2 APBB3 APLP2 APOH ARF3 ARF5 ARF6 ARG2 ARGBP2 ARHGAP19 ARHGEF2 ARMCX2 ARNT2 ARSD ASPH ASTN ATF5 ATP11A ATP2…
239	V$TEL2_Q6	71	71	1105	1055	15089	-3.79	0	0.27	0.07	ABAT ALDOC ATP2B4 ATP5H ATP6V0E B4GALT6 C18orf1 CAPZA1 CASP4 CD68 CENTG1 CGGBP1 CHD2 COX4I1 CREBBP CTAG1B CTTN CYP19A1 DIABLO DKFZP564J0123 DLEC1 EIF2AK1 EIF4E2 ESRRA F9 FAM32A FAM53B FCAR FLJ13955 FLT3LG G6PD GABRA5 GBA GSTM4 HLC-8 ING2 ITGB1 ITGB3 KLHL20 LILRB6 LRP10 MASP2 MGC23401 NEUROD1 NME2 OPA1 PER1 PIK3R1 PIK3R4 POLDIP3 PRDM2 PRKCBP1 PTPN11 RBM19 RFXAP RNASE2 SCYL2 SLC12A5 SLC33A1 SNCG SP…
240	V$ICSBP_Q6	71	71	1105	898	15246	-3.79	0	1.33	0.31	ADAMTS6 ALG8 C14orf114 C1S C20orf18 C21orf62 C4orf8 CALM1 CALM3 CAMK1G CASP4 CCND3 CD44 CDC42EP4 CENTG1 CHRNA1 CLEC7A CSNK1A1 DMD FLJ12606 FLJ20345 FLJ22222 FLJ38984 GABRA5 GRIK3 HLA-B HNRPA3 ICA1 IER2 IFI27 IFIH1 IL10RA ING3 ITGB1 KIAA0276 KIF13B LCE2B LPHN3 LRP10 LTBP1 MAP2K3 MFHAS1 MLLT2 MYT1L N4BP1 NDUFA3 PCDH11X PCSK1 PPP1R3A PTPRR RFX2 RGS3 RNASE2 RUNX1 SLC11A1 SLC4A4 SLC7A11 SMOX SPAG1 SPA…
241	V$PTF1BETA_Q6	113	113	1063	1546	14598	-3.81	0	0.69	0.21	ADAMTS6 AKR1B1 ALDH3A2 ALDH8A1 ANP32B AP3S1 B4GALT5 BBS4 C14orf1 C18orf1 C6orf145 CALM1 CD68 CDC42EP4 CHRDL1 CNOT6 CR1 CSNK2A2 CST1 CUTL1 DHX9 DLX2 DMD DRD4 EFS EIF3S9 ELK3 ESR1 FADS1 FCAR FKBP3 FLJ10618 FLJ20323 FLJ22573 FMR2 FN1 FOXO3A FXR2 GABRA5 GCAT GJA5 GJB5 GPM6A GPR125 GRM5 HLA-DPB1 HSA9761 ITGB4 ITM2A ITPR2 ITSN2 JRK KCNAB2 LHCGR LITAF LOC152185 MAT2A MCAM MCM3AP MDS1 MED25 MGAT2 MRPS11 …
242	V$VBP_01: PAR-type chicken vitellogenin promoter-binding protein	96	96	1080	1284	14860	-3.84	0	0.88	0.23	ADAMDEC1 ADARB2 AGTR1 AKR1C4 ALDH1A2 APOH ARG2 B3GALT2 C14orf114 C16orf33 C1QDC1 C20orf111 CAST CD1B CHAF1A CLDN10 CLEC7A CRIM1 CTAGE5 CTPS2 DHRS9 DMD DNTT DZIP1 ECM2 EHD1 ENSA FAM53B FBXO3 FBXW7 FOLH1 GABRA5 GPR51 GSTA3 HBB HBG1 HOXA9 ICA1 IL15 INHBA IRF2BP1 KCTD15 KIF2 LRRN3 MBTD1 MCL1 MCTP1 NDUFV2 NEBL NFATC1 NOLC1 NUFIP1 NY-REN-7 PAK3 PAPSS2 PDC PDHA1 PER2 PIK3R1 PLCB1 PPP1CC PPP1R12B PPP2CA …
243	V$E2_01: papilloma virus regulator E2	89	89	1087	1173	14971	-3.85	0	1	0.24	ACO2 AGTR1 AKAP12 ALMS1 ARHGAP19 ARSD BBS7 BHLHB2 C20orf111 C21orf2 C4orf9 CD40 CGGBP1 COL4A1 COMT CSF2RB CTBP2 DKFZP434A0131 DMD DR1 DSP E2F3 EFS EMR2 FAM50A FLJ22222 FOXO3A GEMIN6 GPC4 GPRC5C GRAP HCNGP HLA-B IER2 INADL IRF8 ITGB4 ITPR2 KCNAB1 KPNA1 KPNA3 KRTAP5-9 LEREPO4 LILRB6 LITAF LOC51315 LSM5 LTF LUZP4 MAP2K3 MAPK1 MED25 MGC10731 MGC2749 MGLL MINPP1 NEBL NFATC2IP NID NOTCH1 NRG1 OSBPL7 P5…
244	V$SRF_Q6: serum response factor	78	78	1098	1010	15134	-3.85	0	1.14	0.3	ADAM22 ADD3 ADK AKAP12 ANKRD25 ATP2A3 ATP5C1 ATRN BBS7 BICD2 C18orf1 C1S C6orf162 CAP350 CAST CCL22 CD40 CESK1 CLTA COMT COX4I1 COX7C CTBP2 CYP19A1 DDX52 DHX9 DKFZP434H132 DNAJA4 DR1 EGR1 EHD1 ENTPD3 FBN2 FLJ12606 GABRQ GCH1 GCLC GJA5 GOT2 GRIA2 HBB HS322B1A IFI27 IL15 ITGB1 KCNAB1 KDELR3 LEREPO4 LHCGR LRP10 MACF1 MCAM MCL1 MCM3AP MED6 MLLT2 MMP11 MYO5C NT5E NUCKS PFDN1 PP1201 PRC1 PTN RGS3 RSU1 …
245	V$S8_01: S8	101	101	1075	1367	14777	-3.85	0	0.78	0.22	AANAT ADAMDEC1 AGTR1 ALDH8A1 ALG8 ALPP ATP6V1D AVPR1A BMX BTG3 C1QDC1 C22orf3 C6orf62 CAMK1G CAST CDK7 CEPT1 CGA CGI-30 CLDN10 CLEC7A COLQ CPT2 CSNK1G3 DAZAP2 DDX52 DELGEF DHRS9 DLX2 DNTT DRE1 DUSP6 EIF5 ETV1 F9 FAM53B FLJ12716 FLJ20619 FOXO1A GNA14 HBEGF HBG1 HLA-B HLC-8 HTN3 HTR2A IFIH1 IFNAR2 ILT7 ITGA6 ITGB1 KIF13B KL KLHL20 KYNU LDB2 MCM3AP MED6 MYCPBP NPY NRG1 NRIP2 NUBP1 PFDN1 PHF20L1 PIN4…
246	V$CREBP1_01: cAMP-responsive element binding protein 1	25	25	1151	267	15877	-3.86	0	1.98	0.33	APOH C20orf111 CHAF1A DMD ENSA FOLH1 GABRA5 HBB MCL1 NDUFV2 NEBL NOLC1 NUFIP1 PAK3 PDC PER2 REG1B RNMT RNPS1 SLC30A9 TRIB1 TRIM26 TSPYL4 USP25 ZNF395
247	V$POU6F1_01	89	89	1087	1267	14877	-3.86	0	0.43	0.11	ADAMTS6 ADH1A AKR1C4 ALDOB ATF5 B3GALT2 BMX C10orf76 C6orf109 C6orf62 CA1 CALM1 CCND3 CDH10 CLDN10 CNOT1 CYBRD1 DDX52 DHX32 DHX9 DMD DNAJA4 ETV1 FBXW7 FCAR FGFR1 FLJ20619 GPM6A GRM5 HBB HLA-DPA1 HNRPA3 HTN3 ING3 KCNAB1 KIAA1012 KIAA1117 KIF2 KITLG KLRA1 KPNA1 LCE2B LOC90355 LPHN3 NEBL NETO2 NPAT OSBPL10 PCDH11X PCDHGA10 PDC PFDN1 PHF20L1 PHLDB1 POLDIP3 PPT1 PRDM2 RAB38 RAB7 RAP140 RGS3 RNF19 RRAG…
248	V$NKX61_01: NKX6-1	63	63	1113	935	15209	-3.88	0	0.29	0.07	ACYP2 ADAMDEC1 ARHGAP19 BMX BPESC1 C22orf3 CAMK1G CCDC6 CD44 CHAF1A CHD3 COLQ CYBRD1 CYP3A4 DDX18 DMD EIF5 ESR1 FAF1 FAM32A FAM53B GEMIN6 GJA5 GLUD2 HLA-DPA1 HLA-DQB2 HRBL HTR2A IL15 KIAA0143 KPNA2 LRP1B MASP1 MED6 MGC23401 MINPP1 MMP12 MTSS1 NOTCH2 NOTCH2NL NUP214 PCSK1 PDC PEX16 PHF20L1 POMC PPIA PPP1R3A PUM2 RBX1 RIMS2 SASH1 SATB2 SCN3A SFTPB SLAC2-B SLCO1B3 SMOX THOP1 TNFSF11 TRIP4 VANGL1 VCA…
249	V$ATATA_B: Avian C-type TATA box	73	73	1103	946	15198	-3.9	0	1.11	0.3	ACTR8 ADAM18 AGTR1 ANK1 ARF6 ATP2B4 C10orf76 CA1 CAMKK2 CASP4 CCL22 CD200 CDC27 CGA CLEC7A CSE1L CSF2 CSGlcA-T DDX18 DEC1 DHRS9 ELF3 FLJ11767 FOLH1 GPR17 HCNGP HIST2H4 HS3ST2 ICA1 IL12B ING3 ITPR1 KIAA1117 KLF2 LRRN3 MFAP1 MINPP1 MKKS MMP12 MPHOSPH10 MYCPBP PDC PIK3R4 PIN4 POMC PPP2R3A PRC1 PRDM2 PRKAR2B RASGRP3 RGR RGS3 RGS7 RPL28 RPS6KB2 RRAD SERTAD2 SLC7A11 SNRK SOX3 TAC1 TLE3 TLR8 TMSB10 TNC …
250	V$LHX3_01: LIM homeobox transcription factor 3	77	77	1099	1108	15036	-3.9	0	0.39	0.1	AANAT ABCB1 ALG8 ALPP BIRC2 BMX CAST CD68 CEPT1 CGA CGGBP1 CLEC7A CR1 CRIM1 CRYM CTAGE5 DELGEF DET1 DHX32 DIO2 DLX2 ETV1 FLJ10521 FLJ20618 FOXO1A GRM5 HAPLN2 HBEGF HBG1 HLA-DPA1 HTN3 IDS IFIH1 IL15 ITGA6 ITGB1 KCND1 KIAA0528 KIAA0774 KIAA0992 MAB21L1 MAN1A1 MCM3AP NCAM1 NEBL NRG1 NRP2 PCDH11X PHF20L1 PIK3R1 POMC PPIA PRKAR2A PTPRR RANBP9 RNF19 RODH RTN1 SERPINA5 SI SLCO1B3 SNPH SPAG6 SPTLC2 SSPN …
251	V$E2_Q6_01	87	87	1089	1194	14950	-3.93	0	0.66	0.2	ACO2 AGTR1 AKAP12 ALMS1 ARHGAP19 ARSD BBS7 BHLHB2 C1S C21orf62 C4orf9 CD40 CGGBP1 COL4A1 COMT CSF2RB CTBP2 DKFZP434A0131 DMD DR1 DSP E2F3 EFS EMR2 FLJ10521 FLJ22222 FOXO3A GEMIN6 GPRC5C GRAP HCNGP HLA-B IER2 IRF8 ITGB4 ITPR2 KCNAB1 KPNA1 KPNA3 KRTAP5-9 LEREPO4 LITAF LOC51315 LRRFIP1 LSM5 LUZP4 MAP2K3 MAPK1 MGC10731 MGC2749 MGC5306 MGLL MINPP1 NEBL NFATC2IP NID NOTCH1 NRG1 OSBPL7 PAX3 PIP5K2C PLA2…
252	V$MEIS1BHOXA9_02: Meis-1b:HOXA9 heterodimeric binding	16	16	1160	155	15989	-3.94	0	2.12	0.33	ALDH1A2 ARMCX2 CLDN10 CSH2 EIF5B FLJ12606 GABBR1 HERC1 ICA1 NRXN1 PHF20L1 PPP3R1 RPRM SLC4A4 TXNDC9 UMOD
253	V$MAX_01: Max	43	43	1133	667	15477	-3.95	0	0.22	0.07	AKAP12 ALDOC AMFR ARF5 ASPH C5orf4 C7orf28A CAST CDK5R1 CLCNKB CNDP2 COMT CTAG1B DDX52 DHX32 DIO2 DZIP1 HERC1 HMGN4 HSPC016 ITGB1 LCE2B LYPDC1 MARCH3 MET MKKS MXD4 NEUROD1 NPAS1 OTUB2 PADI4 PER2 PIP5K1C PTBP1 QKI RBX1 RGS7 SGTA SLC8A2 SNN TOR1A TSC2 UBE2B
254	V$AR_01: androgen receptor	75	75	1101	1067	15077	-3.95	0	0.45	0.11	ACAD8 ACO2 ALPP AP3S2 ARF3 ARFRP2 ASPH BCL2 BMX C4orf9 CAST CNNM1 COL8A2 CSH2 CYP19A1 DDX1 DKFZP586M1120 DLG5 DMD DR1 FCGR2C FLJ10847 FLJ13646 FLJ38984 FN1 FSD1 GABRA5 GNB1L GRAP GSTA3 H2AFX HTR2A ICAM4 IL12B ITGB3 JPH2 KCNA5 KCNAB2 KLK3 MED25 MGC24381 MRPS12 MT1X NDRG2 OCA2 PAK4 PAX6 PCDHGA10 PDHA1 PER2 PRC1 PRKCBP1 PSME3 PTN RARRES2 SCGB1D2 SH3YL1 SIRT3 SLC11A1 SLC35F2 SMOX SPTB SRD5A1 STAF65(g…
255	V$FREAC2_01: Fork head RElated ACtivator-2	65	65	1111	946	15198	-3.96	0	0.36	0.09	ABAT ABCB1 ABCE1 ADH1A AP2B1 ATR BIRC2 CAST CCL20 CFLAR CLDN10 COL5A2 CSGlcA-T CTTN CUTL1 DDX18 DDX52 DLEC1 DMD FLJ12606 FLJ36754 GIT2 GLUD2 HMGCR HTN3 IFI27 IFNAR2 IGF1R IL15 INSL5 INSR ITPR2 KCNK5 KIAA0376 KRTAP5-8 LDB2 LRP10 MAB21L1 MRPL16 MVK NDUFB8 NEBL NEFL P53AIP1 PCDH11X PDC PI4KII PIP5K1A PLXNC1 PRKAR2B PTN RBM4 RBMS1 SLC22A14 SLCO1B3 SPACA1 SRPX2 TCF1 TM4SF3 TNFRSF11B TNXB TSC2 WWP2 ZBT…
256	V$BACH1_01: BTB and CNC homolog 1	8	8	1168	180	15964	-3.96	0	0.06	0.04	GATA3 HLA-DPB1 NY-REN-7 OTUB2 PIGO SLC12A7 SLC4A4 VCAM1
257	V$ACAAT_B: Avian C-type CCAAT box	80	80	1096	1087	15057	-3.97	0	0.73	0.21	AGXT AKR1B1 ATP2B2 BAHD1 BTN2A2 BZRAP1 C21orf2 C9orf36 CA1 CASP8AP2 CD72 CDC14B CDC2L6 CLTA CNDP2 COBLL1 COPZ2 CSF2 DMN DUSP10 E2F3 FETUB FLJ14146 FPGS FXR2 FYCO1 GALGT GMPR HLA-DPB1 HNRPA3 HRBL IMP4 INHBA KCNC3 KIAA0276 KPNA2 KRTAP5-8 MASP2 MGC24381 MGC5297 MT1F MT1H MTHFD1 NFATC2IP NPAT NUP98 P2RY10 PAX5 PDE4D PER2 PHF20L1 PIK3C3 POLG PPT1 PTPN4 ProSAPiP1 R3HDM RASL12 RBL1 RGN RGS4 RGS5 RPL28 S…
258	V$HEN1_01: HEN1	51	51	1125	639	15505	-3.98	0	1.27	0.31	ACTL7B ANKHD1 ATF5 ATP2A3 ATP2B2 C17orf25 C1QDC1 C4orf9 C6orf62 CD40 CHKB COL21A1 CSF1 DAPK3 DIABLO DOK4 FLJ11767 FLJ12716 FOXO3A GADD45GIP1 GATA2 GIT2 HIST2H4 HLA-DQB2 HMGN4 KCNA5 KCNQ2 LITAF LSM5 MGC10471 MGC3101 MTSS1 NOTCH1 PAX8 PDLIM4 PEX16 PIK3C3 PLXNC1 PRKCB1 PTK6 PURA ProSAPiP1 RGR RGS3 SEC14L2 SEPT6 SLC4A3 SNRK TBPIP UBE3B UMOD
259	V$RP58_01: 58 KDA repressor protein	18	18	1158	323	15821	-3.99	0	0.11	0.04	ADAMDEC1 AKR1C4 CASP4 DDX28 DLG5 GCH1 MRPS11 PDHA1 PHLDB1 PRDM2 REG1B SRPX2 TAC1 TEAD3 TNFSF11 TRIM31 VSNL1 WFDC1
260	V$STAT5A_01: signal transducer and activator of transcription 5a	65	65	1111	930	15214	-3.99	0	0.43	0.11	ACAD8 AKAP12 ALPP ASPH BBS7 CASP4 CDC14B CHRNA1 CSF2RA DELGEF DMD DNCI2 DPF3 DSP DUSP10 EFNB2 F9 FKBP3 FLJ10618 FLJ13955 FLJ14146 GALGT GPATC3 GRIA2 IGSF6 IL12B IL15 ING3 ITPK1 KCNJ5 KDELR3 KIAA0774 KIF2 KIR2DL5 KPNA1 LRRN3 LZTS1 MGAT2 MLSTD1 NDUFA3 NRG1 PIK4CB PPP2R3A PTK6 PUM2 RIP RPL31 RSU1 SATB2 SAV1 SCYL2 SLC22A14 SYNC1 TLR1 TNC TNXB TRPM3 UBE3B USP25 VANGL1 VCL WWTR1 ZHX3 ZNF20 ZNF423
261	V$OCT1_05: octamer-binding factor 1	74	74	1102	1009	15135	-4.01	0	0.7	0.21	ACYP2 ADAMTS6 ALMS1 ARGBP2 ARHGAP19 ASPH C21orf62 C6orf32 CA1 CAMP CASP4 CGA CLST11240 COLQ CRP DET1 DMD DOK4 E2F3 EIF3S12 ESRRA ETV1 FOLH1 GALNT10 GPM6A HLA-DPA1 HTN3 ICA1 IL15 ITGB5 KIAA0774 KIR2DL5 KYNU LPPR2 MAPK1 MLSTD1 MYCN MYT1L NEBL NRIP2 NT5E PAK3 PAX6 PDC PEG3 PHLDB1 PIP5K2C PLCL2 PPP1R12B RANBP9 RFXAP SATB2 SCIRP10 SCN3A SFRS7 SHB SLC22A6 SLC25A12 SLC35A1 SLC7A11 SLCO1B3 SMOX SORCS3 SP…
262	V$FREAC4_01: Fork head RElated ACtivator-4	15	15	1161	145	15999	-4.02	0	2.06	0.33	ATR BIRC2 CASP5 CAST FDFT1 GLUD2 HMGCR LRP10 SLC25A12 SP110 TCF1 TIA1 TM4SF3 WWP2 ZNF395
263	V$OCT1_B: Octamer binding factor 1	70	70	1106	966	15178	-4.04	0	0.62	0.2	ACYP2 ADAMTS6 ALMS1 ARGBP2 ASPH C21orf62 CA1 CD79B CDC14B CENTG1 CLST11240 CR1 DDX18 DET1 DLGAP2 DLGAP4 DMD DNTT DOK4 E2F3 ETV1 F8A1 FOXO3A GALNT10 GBA GPM6A HBG1 HTN3 IL15 KIAA0774 KYNU LOC90355 LPPR2 MAB21L1 MAPK1 MGC5297 MLSTD1 MYT1L NEBL NOTCH1 NRIP2 NRXN1 PAX6 PPP2R3A PRDM2 RFXAP RIPK5 RODH RPL28 RTN1 SATB2 SBLF SCIRP10 SFI1 SFRS7 SLC22A6 SLC25A12 SMAD3 SMOX SPATA5L1 SRF TIA1 TNC TNFRSF9 TNF…
264	V$HNF4_01_B: Hepatocyte nuclear factor 4	43	43	1133	651	15493	-4.04	0	0.28	0.07	ATP2B1 BRAP CDC34 CFHL2 CLST11240 CNOT1 COL8A2 COMT COX7C DALRD3 DDC DKFZP564J0123 DKFZP586M1120 ECM2 EPB49 FLJ13725 GPRC5C GSTM4 IGF1R ITGB1 KCNAB2 KIF2 MGC5297 PCDHGA10 PDE2A PPIE PPP2CA PRDM2 RAPGEFL1 RCD-8 RGS3 RIP SCML2 SHANK2 SLC12A7 SLCO1B3 TAGLN3 TBPIP TCF1 TNFRSF11B UBE1C UBE2I ZC3HDC1
265	V$GR_01: high affinity binding site for glucocorticoid receptor	59	59	1117	848	15296	-4.05	0	0.42	0.1	ACACA ANK1 APOH ARF3 ATP2A3 BBS7 BHLHB2 BPI C21orf62 C4orf9 CAMKK2 CAPZA1 CAST COL11A2 DLG5 EIF5B FBXW7 FGFR1OP FLJ20345 GJB5 GLUD2 GPATC3 GRPEL1 GSTA3 HCNGP HTR2A IL9R ITGA6 JPH2 KLK3 MAOA MAPKAPK2 MED25 NDUFV2 NEF3 PCDHGA10 PDLIM4 PHF20L1 PIK3C3 PIK3R1 PPP1CC PPP1R3A PPP2R2B PRKD2 PSD3 PSMB2 PUM2 RNASE2 SACS SCFD1 SCGB1D2 SLC11A1 SMOX SMU1 SRD5A1 THY1 TU3A TXNDC9 VprBP
266	V$FOXO1_02: fork head box O1	65	65	1111	909	15235	-4.06	0	0.55	0.14	ABCB1 ADH1A AP2B1 ATR BBS4 BIRC2 CCL20 CLDN10 COL5A2 CR1 CSGlcA-T CTTN CUTL1 DDX18 DDX52 DMD FLJ12606 FLJ13646 FLJ13955 FLJ36754 FOXO1A FRAT1 GIT2 GLUD2 HMGCR ICA1 IFI27 IFNAR2 IGF1R IGSF6 IL15 INSL5 INSR ITPR2 KCNK5 KRTAP5-8 LDB2 LOC152185 MAB21L1 MRPL16 MVK NDUFB8 NEBL PCDH11X PDC PI4KII PIP5K1A PLXNC1 PP1201 PTN RBM4 RBMS1 SEC63 SLC22A14 SLCO1B3 SP110 SRPX2 TCF1 TNFRSF11B TNFSF14 TNXB WT1 WWTR…
267	V$E4BP4_01: E4BP4	37	37	1139	573	15571	-4.06	0	0.24	0.07	AKR1C4 C16orf33 C1QDC1 CAST CLDN10 CLEC7A CRIM1 DMD DZIP1 ECM2 EHD1 FBXO3 FBXW7 GSTA3 HBG1 ICA1 IL15 IRF2BP1 KIF2 MCL1 MCTP1 NEBL NFATC1 PAK3 PPP1CC PPP2R3A RB1CC1 RGS4 SLC7A11 SMAD3 SP110 THRAP2 TLR8 TM4SF6 TP53I3 VANGL1 ZNF268
268	V$NFMUE1_Q6	57	57	1119	745	15399	-4.08	0	0.97	0.24	ACTR8 AP3S1 APBB3 ATP5H BCL11B C20orf67 C6orf109 CAPZA1 CHD2 CHD3 CREBBP CUTL1 ECH1 EIF5 FBXO3 FGFR1OP FLJ13646 FLJ20323 FTL GABRQ GADD45GIP1 GPATC3 HCNGP MAT2A MED25 MRPS11 NDUFB8 NEBL NME2 NPAS1 NUP160 PFDN1 PIAS4 PLCB1 POLDIP3 PPP1R12B PTBP1 RAB14 RAB38 RBM19 RBM8A RIP RNF121 SCFD1 SCN3A SLC25A6 STAG1 SUV39H1 TIA1 TNKS TOR1A TRIP4 TTC17 UBE3B USP15 USP46 ZDHHC17
269	V$E2F_02: E2F	43	43	1133	539	15605	-4.09	0	1.2	0.3	ACACA ALG8 ARHGEF2 C1orf41 C3orf14 CASP8AP2 COBLL1 COX7C CUTL1 DJ462O23.2 ELOVL2 ENSA FAM32A FGFR1 FLJ12716 IDS ING3 IQSEC1 JRK KIR2DL5 LUC7L2 MEOX2 MKKS MYCN MYCPBP NEUROD1 NFATC2IP NOTCH2 NOTCH2NL NUBP1 NUCKS PEG3 RBL1 RIPK5 SEC31L1 SHREW1 SLAC2-B SLC35A3 SOX3 TFDP1 TNXB TRIM26 ZF
270	V$E2F_Q3: E2F	43	43	1133	539	15605	-4.09	0	1.2	0.3	ACACA ALG8 ARHGEF2 C1orf41 C3orf14 CASP8AP2 COBLL1 COX7C CUTL1 DJ462O23.2 ELOVL2 ENSA FAM32A FGFR1 FLJ12716 IDS ING3 IQSEC1 JRK KIR2DL5 LUC7L2 MEOX2 MKKS MYCN MYCPBP NEUROD1 NFATC2IP NOTCH2 NOTCH2NL NUBP1 NUCKS PEG3 RBL1 RIPK5 SEC31L1 SHREW1 SLAC2-B SLC35A3 SOX3 TFDP1 TNXB TRIM26 ZF
271	V$E2F4DP1_01: E2F-4:DP-1 heterodimer	43	43	1133	539	15605	-4.09	0	1.2	0.3	ACACA ALG8 ARHGEF2 C1orf41 C3orf14 CASP8AP2 COBLL1 COX7C CUTL1 DJ462O23.2 ELOVL2 ENSA FAM32A FGFR1 FLJ12716 IDS ING3 IQSEC1 JRK KIR2DL5 LUC7L2 MEOX2 MKKS MYCN MYCPBP NEUROD1 NFATC2IP NOTCH2 NOTCH2NL NUBP1 NUCKS PEG3 RBL1 RIPK5 SEC31L1 SHREW1 SLAC2-B SLC35A3 SOX3 TFDP1 TNXB TRIM26 ZF
272	V$FOXO3_01: fork head box O3	30	30	1146	351	15793	-4.11	0	1.5	0.33	ABCB1 ADH1A BIRC2 COL5A2 CUTL1 DDX18 DDX52 FLJ13646 FLJ36754 GIT2 GLUD2 HMGCR IGSF6 IL15 INSL5 ITPR2 KRTAP5-8 LDB2 LOC152185 MVK NDUFB8 PDC PI4KII PIP5K1A PTN RBMS1 SLC22A14 SRPX2 WT1 ZNF395
273	V$NFY_C: NF-Y binding site	29	29	1147	338	15806	-4.11	0	1.5	0.33	APOH ARGBP2 BAHD1 C6orf32 C7orf28A CDKN2D CLTA DMN ENSA FCGR2C FXR2 HRBL IL24 MGAT2 MGC2749 MTHFD1 MVK PBX1 PEG3 PER1 PI4KII RBL1 RBM4 RGS4 SARG SUV39H1 ZBTB10 ZNF136 ZNF267
274	V$MIF1_01: MIBP-1 / RFX1 complex	16	16	1160	162	15982	-4.11	0	1.88	0.33	DKFZP586M1120 DLX2 FBXW7 GLRA3 HOMER3 ITGB8 KCNA5 KIF17 MED25 PIK3R4 RIBC2 RNF19 SIRT3 TMPRSS5 TRIM36 ZBTB16
275	V$CLOX_01: Clox	19	19	1157	328	15816	-4.13	0	0.15	0.05	ALDH1A2 CA1 CAMP COL5A2 CSE1L DDX18 FLJ13197 FYCO1 LEREPO4 PCDH11X PDE4D PER1 PIK3R1 RGS3 SAFB2 SLC7A11 SPATA5L1 VIPR2 VNN3
276	V$HEN1_02: HEN1	29	29	1147	341	15803	-4.14	0	1.45	0.32	ANKHD1 ATF5 ATP2A3 C4orf9 CHKB CSF1 DIABLO DOK4 GADD45GIP1 GIT2 HLA-DQB2 KCNA5 LSM5 MGC10471 MGC3101 MTSS1 NOTCH1 OSBPL7 PAX8 PEX16 PIK3C3 PLXNC1 PTPRT RGR RGS3 RNF11 SEPT6 UBE3B ZNF136
277	V$TAL1ALPHAE47_01: Tal-1alpha:E47 heterodimer	55	55	1121	773	15371	-4.14	0	0.53	0.14	AANAT AGTR1 AKAP12 BPI C20orf111 CABP1 CASP4 CD68 CFLAR CHRNA9 CLST11240 COL5A2 DLG5 DUSP10 EIF3S9 FLJ00060 FLJ22573 GDAP1L1 IFIH1 IFNAR2 IL12B INHBA ITGB3 ITGBL1 KCNJ5 KIAA1117 KIF17 LTBP1 MAP1A MGC5306 MGLL MRPS11 NUP214 PAK3 PDHA1 PRDM2 ProSAPiP1 RB1CC1 REG1B RPRM RTN1 SCML2 SEC63 SIGLEC8 SLC25A12 STAT5A SYNGR3 TBXA2R THOP1 TMEM16C TMEM4 TNFSF11 TRIM31 VNN3 ZPBP
278	V$TFIII_Q6	1138	1138	38	15571	573	-4.14	0	1.14	0.3	13CDNA73 AANAT ABAT ABCB1 ABCE1 ABLIM3 ACACA ACAD8 ACCN1 ACO2 ACSL6 ACTL7B ACTN1 ACYP2 ADAM18 ADAM22 ADAM30 ADAMDEC1 ADAMTS6 ADARB2 ADCY2 ADD3 ADH1A ADK ADORA2B AFM AGTR1 AGXT AKAP12 AKAP4 AKR1C4 ALDH1A2 ALDH3A2 ALDH8A1 ALDOB ALDOC ALG8 ALMS1 ALPP AMFR ANK1 ANKHD1 ANKRD25 ANP32B AP2B1 AP3S1 AP3S2 APBB3 APLP2 ARF3 ARF5 ARF6 ARG2 ARGBP2 ARHGAP19 ARHGEF2 ARMCX2 ARNT2 ARSD ASPH ASTN ATF5 ATP11A ATP2A…
279	V$PPARA_02: PPAR-alpha:RXR-alpha heterodimer (peroxisome proliferator activated factor alpha:retinoid X receptor alpha)	43	43	1133	548	15596	-4.15	0	1.08	0.28	AGTR1 AMFR C20orf111 C21orf62 C6orf145 CALM1 CLCNKB CMKLR1 COBLL1 CSH2 CTDSPL DDX1 DOCK4 ELF3 ENSA ERF ESRRA FGFR3 FLJ11767 FLJ36754 HNRPA3 INA KCNC3 KDELR3 KIF2 MGC2749 MGC35048 NOTCH2 NOTCH2NL OTUB2 PCGF2 PDCD4 PDHA1 PEX11A PFDN1 PSME4 SCYL2 SIRT6 SS18L1 SYNGR3 TNRC4 VCAM1 ZNF500
280	V$HTF_01	52	52	1124	724	15420	-4.17	0	0.58	0.16	ACCN1 ARMCX2 ARNT2 ATP2B2 B3GALT2 BCL2 CASP4 CENTG1 CLCN3 COMT CRYZ D2LIC DLGAP2 DZIP1 FBXW7 FCAR FKBP8 FLJ14146 FTL GALNT10 GATA2 HYOU1 IL9R ING3 IRAK4 KDELR3 KIAA0040 KIAA0143 LUZP4 MACF1 MARCH6 MGAT2 MLLT2 MPHOSPH10 NEUROD4 PEG3 PHF20L1 PTPRR RAB7 RANBP2 REG1B RGN RHEB RNF19 RRAD SCFD1 SH3YL1 SLCO1C1 SPAG6 SYNCRIP TCF7L2 TNNC2
281	V$ARNT_02: AhR nuclear translocator homodimers	51	51	1125	696	15448	-4.17	0	0.68	0.21	AKAP12 ARF6 ARMCX2 C5orf4 CAST CDK7 CHAF1A CTAG1B DKFZP586M1120 DLX2 DMD FAM32A FLJ10618 FLJ12606 GNAS HNRPA3 HOXA9 KIAA1012 KPNA3 LOC138046 LYPDC1 MAP2K3 MAPK1 MGC24381 MKKS NFX1 PHF20L1 PIAS4 PIP5K1A PIP5K2C POLR1D PTBP1 PURA RBL1 RBX1 RGS7 RRAGC SDFR1 SLC23A2 SLC33A1 SLC6A2 SNN SPRED2 SSH3 THRAP2 TREX1 TSC2 UBE2B UTX WWP2 YWHAZ
282	V$PR_02: is recognized by progesterone receptor	44	44	1132	630	15514	-4.21	0	0.46	0.11	AFM ANP32B ARF3 C21orf62 CAMKK2 CASP4 CAST CD72 CTAGE5 CTBP1 DLG5 DNCI2 FLJ13955 FLJ20345 FZD5 GJB5 GSTA3 HMGN3 HTR2A ITGBL1 JMJD2B JPH2 KCNAB1 KLK3 LRRN3 MRCL3 PADI4 PCDHGA10 PDHA1 PIK3R1 PPP2R2B RIP RNASE2 RTN1 SCFD1 SCGB1D2 SLC11A1 SLC35A1 SMOX SRD5A1 STAT5A UTS2 VprBP ZHX3
283	V$STRA13_01	47	47	1129	636	15508	-4.21	0	0.73	0.21	ACO2 ARF5 ARF6 ARMCX2 C5orf4 CAST CDK7 CHAF1A CTAG1B DKFZP586M1120 DLX2 DMD FAM32A FLJ10618 FLJ12606 HNRPA3 HOXA9 KIAA1012 KLK3 LYPDC1 MAP2K3 MEOX2 MGC24381 MKKS NFX1 PHF20L1 PIAS4 PIP5K1A PIP5K2C POLR1D PTBP1 PURA RBL1 RBX1 RRAGC SDFR1 SLC23A2 SLC33A1 SPRED2 THRAP2 TIMM23 TREX1 TSC2 UBE2B UTX WWP2 YWHAZ
284	V$GATA4_Q3	1132	1132	44	15560	584	-4.22	0	0.47	0.11	13CDNA73 AANAT ABAT ABCB1 ABCE1 ABLIM3 ACACA ACAD8 ACCN1 ACO2 ACSL6 ACTL7B ACTR8 ACYP2 ADAM18 ADAM22 ADAM30 ADAMDEC1 ADAMTS6 ADARB2 ADD3 ADH1A ADK ADORA2B AFM AGTR1 AGXT AKAP12 AKAP4 AKR1B1 AKR1C4 ALDH1A2 ALDH3A2 ALDH8A1 ALDOB ALDOC ALG8 ALPP AMFR ANK1 ANKHD1 ANKRD25 ANP32B AP2B1 AP3S1 AP3S2 APBB3 APLP2 APOH ARF3 ARF6 ARFRP2 ARG2 ARGBP2 ARHGAP19 ARHGEF2 ARMCX2 ARNT2 ARSD ASPH ASTN ATF5 ATP11A ATP…
285	V$E4F1_Q6	40	40	1136	515	15629	-4.22	0	0.99	0.24	ARNT2 C20orf67 CASP9 CDC34 CDIPT CHAF1A COLQ EGR1 ENSA FKBP8 FLJ13646 FPGS FXR2 GOT2 HCNGP HMGCR ICAM1 IL9R ING3 IRF2BP1 KDELR3 KIR2DL5 MVK MYCPBP NDUFV2 NOLC1 NUCKS PAK3 PCSK2 PEG3 PSME3 RAB14 RNMT SATB2 SHREW1 SLC30A9 SPACA1 TFDP1 TRIB1 TRIM26
286	V$R_01: Epstein-Barr virus transcription factor R	26	26	1150	413	15731	-4.23	0	0.23	0.07	CHRNB3 CLDN10 CLST11240 COBLL1 FLJ20323 FOXO3A GABBR1 GPR125 GPR64 KCNQ2 MYCPBP NDUFA3 NFX1 NRG1 PAX5 PPARD PPP2CA RAPGEF4 RNPS1 RUNX1 SAP30 SLC12A9 TMC7 WWP2 XYLB ZBTB10
287	V$TAL1BETAITF2_01: Tal-1beta:ITF-2 heterodimer	43	43	1133	605	15539	-4.25	0	0.53	0.14	AGTR1 AKAP12 ARF6 ATRN BPI C20orf111 CABP1 CD68 CD72 CFLAR CHRNA9 CLST11240 COL5A2 DLG5 DMD DUSP10 EIF3S9 FLJ00060 GDAP1L1 IFIH1 IL12B INHBA ITGBL1 MAP1A MGLL MYT1L PAK3 PDHA1 RNF19 RTN1 SEC63 SIGLEC8 SLC25A12 SLC35A3 SMAD3 SYNGR3 THOP1 TMEM16C TMEM4 TRIM31 VNN3 ZBTB16 ZPBP
288	V$TAL1BETAE47_01: Tal-1beta:E47 heterodimer	29	29	1147	444	15700	-4.28	0	0.3	0.07	AKAP12 CABP1 CD68 CFLAR CLST11240 COL5A2 DLG5 DUSP10 EIF3S9 FLJ00060 FLJ22573 GDAP1L1 IFIH1 IL12B INHBA ITGBL1 MAP1A MGLL PAK3 PDHA1 RTN1 SEC63 SLC25A12 SYNGR3 THOP1 TMEM16C TMEM4 VNN3 ZPBP
289	V$FXR_Q3	15	15	1161	262	15882	-4.31	0	0.16	0.05	AANAT ADAMDEC1 CPT2 CRYM CRYZ DDAH2 GRM5 IGSF4C LRP1B NDUFA3 PPP1R12B RASL12 SNN WDFY3 ZF
290	V$HOX13_01: Hox-1.3	21	21	1155	241	15903	-4.31	0	1.41	0.32	AFM C6orf32 CMKLR1 CSNK1G3 DDX52 FBXW7 GALGT GPM6A IL12B KIAA0143 MAT2A NDUFV2 NOTCH4 PEG3 ProSAPiP1 RIMS2 RPRM TNFRSF11B TOR1A YIF1 ZNF267
291	V$ALPHACP1_01	33	33	1143	424	15720	-4.33	0	0.96	0.23	ARFRP2 ARGBP2 BAHD1 BAI3 C14orf1 CAMKK2 CAST CDC2L6 CDH1 CDH11 CRIM1 DLX2 DMN DUSP6 FPGS GNAS GRPEL1 ITGB4 KCNC3 LMAN2 MAP3K9 MFAP1 MGC10471 MTHFD1 MVK PCP4 PEX16 RGS4 SLC25A6 THY1 VprBP ZBTB10 ZBTB20
292	V$SRF_C: serum response factor	34	34	1142	489	15655	-4.33	0	0.46	0.11	ADAM22 ADK AKAP12 ATP5C1 ATRN BICD2 C18orf1 C1S CLTA COMT CYP19A1 DHX9 DKFZP434H132 DNAJA4 EGR1 ETV1 GABRQ GOT2 HS322B1A KCNAB1 LHCGR MCL1 PFDN1 PPP2CA RAP2C RSU1 SLAC2-B SRF STOML1 TRIM31 UBE1C VCL WWTR1 YWHAZ
293	V$MEF3_B: MEF-3	34	34	1142	468	15676	-4.38	0	0.63	0.2	BGR C1S CCDC6 CCL22 CESK1 CGI-12 CSF2RA CSNK1A1 CTBP2 DALRD3 GJB5 GPRC5C IFI27 KIAA1012 LILRB6 MMP11 MTHFD1 MVK NDUFB8 NKX3-1 PAPSS2 PAX6 PAX8 PCDH9 PRL PTN SLC30A9 SLC4A3 SOX3 TSPYL4 UGT1A6 Ufm1 VSNL1 WIPI-2
294	V$E2F_01: E2F	8	8	1168	163	15981	-4.39	0	0.1	0.04	C20orf111 C3orf14 CLTA ENSA FGFR1 NRP2 ST3GAL4 TFDP1
295	V$FOXO4_02: fork head box O4	31	31	1145	440	15704	-4.4	0	0.51	0.13	ABCB1 ADH1A BIRC2 COL5A2 CUTL1 DDX18 DDX52 FLJ12606 FLJ13646 FLJ36754 FOXO1A GIT2 GLUD2 HMGCR IGSF6 INSL5 INSR ITPR2 KRTAP5-8 LDB2 LOC152185 MVK NDUFB8 PCDH11X PLXNC1 PTN RBMS1 TNXB WT1 WWTR1 ZNF395
296	V$OCT1_01: octamer factor 1	31	31	1145	406	15738	-4.4	0	0.85	0.23	ADAMTS6 CA1 CENTG1 E2F3 ETV1 F8A1 GALNT10 GNA14 HTN3 KIAA0774 LPPR2 MAPK1 NRIP2 NRXN1 PDC PPP2R3A PRDM2 RFXAP RTN1 SCIRP10 SLC25A12 SMOX SPATA5L1 SRF TNC TNFRSF9 USP9Y WDFY3 ZNF142 ZNF20 ZP3
297	V$EVI1_06: ectopic viral integration site 1 encoded factor	17	17	1159	190	15954	-4.4	0	1.42	0.32	ACACA ATP2B1 ATP6V0E ATP8A2 CAST CGA COL21A1 FADS1 FKBP8 HBG1 HTN3 MGC35048 NRXN1 PHF20L1 PSME4 RGS5 TBX19
298	V$CDPCR3_01: cut-like homeodomain protein	27	27	1149	345	15799	-4.41	0	0.95	0.23	ARHGAP19 ATP5C1 BBS7 CA1 GSTA3 IL12B IRF8 LOC51315 MAB21L1 MCL1 MGC35048 NETO2 PCDH11X PIP5K1A PPP2R3A PTPRR RRAGC SARG SCGB1D2 SGK2 SLIT2 SP110 TLR8 TMPRSS5 TPP1 TUBG2 ZNF268
299	V$NGFIC_01: nerve growth factor-induced protein C	30	30	1146	395	15749	-4.42	0	0.82	0.23	ADD3 AKAP12 ATP8A2 CDH11 CGGBP1 CGI-12 CUTL1 DDX28 HNRPDL ITGB8 KCNK5 KDELR3 LRRFIP1 MAN1A1 MXD4 OSBPL10 PIP5K1C PPP2R3A RAB38 RBX1 RFX2 RPL31 SCML2 SLC12A2 SLC12A5 SOX2 SSH3 THOP1 UBE2I UBP1
300	V$IRF1_01: interferon regulatory factor 1	28	28	1148	365	15779	-4.42	0	0.86	0.23	BATF BIRC2 CCDC6 CDKN2D COL5A2 DR1 E2F3 FLJ10618 FLJ12606 FLJ13197 FOXO3A HIC HIST2H4 HNRPA3 HTR2A IL15 MAT1A MLLT2 MVK PCSK1 PER1 PPP2R2B PSMB2 PTPRR SP110 TCF7L2 TRPM3 ZNF305
301	V$GRE_C: Glucocorticoid response element	30	30	1146	396	15748	-4.43	0	0.81	0.23	ANP32B ARF3 ASPH C21orf62 CAST CSH2 FLJ10847 FN1 GSTA3 HMGN3 HTR2A IL12B JPH2 KIAA0992 LCE2B MRPS12 NOTCH4 PAX6 PCDH11X PCDHGA10 PPIL2 PTN PUM2 SH3YL1 SLC11A1 SLC35A1 SMOX SRD5A1 WDFY3 WWTR1
302	V$RSRFC4_Q2	27	27	1149	398	15746	-4.43	0	0.4	0.1	AFM ARSD BICD2 CCL20 CTAGE5 DNCI2 FLJ14146 FYCO1 GPATC3 HBB IL20RA KIAA0143 MAL MEOX2 MLLT2 MPHOSPH10 NDRG2 NDUFV2 NFX1 PPP1R3A PPP2R3A RAP2C RASGRP3 RGS3 RIP SLC8A2 TAC1
303	V$ATF6_01: activating transcription factor 6	29	29	1147	380	15764	-4.44	0	0.84	0.23	ARMCX2 ATRN BRD1 C11orf9 CASP9 CENTG1 CTBP1 DZIP1 FLJ00060 FLNC GOT2 HYOU1 IRAK4 KDELR3 KLK3 LUZP4 MARCH6 MPHOSPH10 PHF20L1 RAB7 RANBP2 RNF19 SCFD1 SCML2 SOX3 TFDP1 TNKS ZBTB16 ZNF500
304	V$MEIS1AHOXA9_01: Meis-1a:HOXA9 heterodimeric binding	8	8	1168	160	15984	-4.45	0	0.12	0.04	ALDH1A2 FTH1 PPP1R3A PRKCBP1 RPRM RSU1 SLC22A14 TPMT
305	V$EGR2_01: Egr-2/Krox-20 early growth response gene product	22	22	1154	337	15807	-4.45	0	0.32	0.08	ADD3 ARNT2 ATP8A2 CDC14B CGI-12 ERF HNRPDL ITGB8 KDELR3 MAN1A1 NEUROD1 PIP5K1C PPP2R3A PPP3CA RAB38 RFX2 RPL31 SLC12A5 SSH3 THOP1 UBE2I UBP1
306	V$DTYPEPA_B: poly A signal of D-type LTRs	8	8	1168	70	16074	-4.45	0	1.84	0.33	DMD EPHA2 HNRPDL NUCKS NUP160 POMC SERTAD2 SPTLC2
307	V$CDP_02: transcriptional repressor CDP	9	9	1167	174	15970	-4.46	0	0.13	0.04	ALDH1A2 COL5A2 CSE1L PCDH11X PER1 PIK3R1 SAFB2 SLC7A11 VIPR2
308	V$RORA2_01: RAR-related orphan receptor alpha2	10	10	1166	186	15958	-4.47	0	0.15	0.05	CYP19A1 GPM6A MMP12 NDUFB8 NPAS2 PLCL2 PPP2CA TPD52 TRIM36 ZNF20
309	V$PR_01: high affinity binding sites for progesterone receptor	12	12	1164	212	15932	-4.47	0	0.17	0.05	ARF3 FLJ20345 GJB5 GSTA3 HTR2A JPH2 MKL2 PCDHGA10 PIK3R1 SCGB1D2 SMOX SRD5A1
310	V$MEF2_03: myogenic MADS factor MEF-2	26	26	1150	342	15802	-4.48	0	0.81	0.23	BICD2 C5orf4 CCL20 CTAGE5 FLJ14146 GPATC3 HBB HIST2H4 HLX1 ING3 MLLT2 MPHOSPH10 NDRG2 NDUFV2 NFX1 NRXN1 NUCKS PPP1R3A PPP2R3A RAP2C RASGRP3 RGS3 RIP SFRS7 SLC8A2 TAC1
311	V$RSRFC4_01: related to serum response factor, C4	10	10	1166	97	16047	-4.48	0	1.66	0.33	CCL20 HBB MLLT2 MPHOSPH10 NDRG2 PPP1R3A RAP2C RASGRP3 RGS3 RIP
312	V$HFH4_01	27	27	1149	371	15773	-4.49	0	0.63	0.2	ADAMTS6 ADH1A AKAP12 BAI3 C14orf1 CAST CDC14B CLIC5 COAS2 CUTL1 FLJ22222 FOXO3A FRAT1 GRAP HBB IL15 KIF17 LDHA MGC10731 NEUROD4 PFDN1 PTAFR PZP RASGRP3 TOX WWTR1 ZNF305
313	V$POU3F2_02	4	4	1172	101	16043	-4.52	0	0.07	0.04	HTN3 KIAA0774 PDC SHB
314	V$POLY_C: Retroviral Poly A signal	16	16	1160	258	15886	-4.53	0	0.26	0.07	BAI3 C20orf19 CDKN2D CYP3A4 FETUB HIST1H1C PEX16 PPP1R12B PRL RBMS1 REG1B SLCO1C1 SNAPC2 SUPT4H1 TEAD3 VSNL1
315	V$LXR_DR4_Q3	14	14	1162	155	15989	-4.53	0	1.35	0.31	ABAT AKR1C4 ARSD CDC42EP4 COX7C FCGR2C GBA GTSE1 PIP5K1A PLA2R1 POLR1D RAMP1 STS TNS
316	V$STAT5B_01: signal transducer and activator of transcription 5b	20	20	1156	299	15845	-4.56	0	0.39	0.1	DSP EIF2AK1 FLJ13955 FLJ36754 GRIA2 IFI27 IGSF6 KIR2DL5 LRRN3 LZTS1 MLSTD1 PUM2 SYNC1 TBC1D5 TBCE TMSB10 TNC UBE3B VANGL1 VCL
317	V$EVI1_03: ectopic viral integration site 1 encoded factor	4	4	1172	25	16119	-4.56	0	2.04	0.33	BAI3 CDC27 CLTA PRP19
318	V$HOGNESS_B: Imperfect Hogness /Goldberg Box	16	16	1160	188	15956	-4.57	0	1.17	0.3	ACACA ACYP2 ADD3 C16orf33 CENPE CFLAR FLJ22573 FOLH1 HP IL9R KPNA3 LMAN2 PPIL2 RANBP2 SGTA SLC35A1
319	V$STAF_01: Se-Cys tRNA gene transcription activating factor	22	22	1154	294	15850	-4.58	0	0.73	0.21	C20orf19 CNOT1 COX7C Cep192 EIF5B FSD1 IRF2BP1 LEREPO4 MARS MRPS11 NFATC2IP PRP19 R3HDM RPL31 SASH1 SIRT6 SPTLC2 SUPT4H1 TXNDC9 USP15 ZBTB10 ZNF500
320	V$EGR3_01: early growth response gene 3 product	20	20	1156	288	15856	-4.61	0	0.49	0.11	ADD3 ARNT2 ATP8A2 CGI-12 ERF HNRPDL IL20RA ITGB8 KDELR3 MAN1A1 NEUROD1 PIP5K1C PPP2R3A RAB38 RFX2 SCML2 SSH3 THOP1 UBE2I UBP1
321	V$OCT1_07: octamer factor 1	11	11	1165	187	15957	-4.66	0	0.23	0.07	GALGT GPM6A HTN3 KIAA0774 KPNA3 PLCL2 PRDM2 PRKAR2B SBLF TUBG2 ZP3
322	V$EGR1_01: Egr-1/Krox-24/NGFI-A immediate-early gene product	17	17	1159	230	15914	-4.7	0	0.67	0.2	C6orf210 CASP9 CDH11 CUTL1 GAN IGF2 KDELR3 LRRFIP1 MXD4 NEUROD1 PPP3CA RPL31 SLC12A5 SOX2 SSH3 THOP1 UBE2I
323	V$CAAT_C: Retroviral CCAAT box	14	14	1162	171	15973	-4.72	0	0.98	0.24	AVPR1A CR1 CTPS2 DNTT GABBR1 LRP10 NRP2 PEG3 RHEB TBPIP TNKS TRIB1 UBE3B WFDC1
324	V$MYCMAX_01: c-Myc:Max heterodimer	10	10	1166	108	16036	-4.74	0	1.27	0.31	CAST COMT DHX32 DIO2 HMGN4 HNRPDL ITGB1 PER2 SGTA YIF1
325	V$AR_03: is recognized by androgen reseptor	15	15	1161	194	15950	-4.75	0	0.8	0.22	ARF3 BHLHB2 C21orf62 CAST DLG5 FBXW7 GSTA3 HTR2A JPH2 KLK3 PCDHGA10 PIK3R1 SLC11A1 SMOX SRD5A1
326	V$HSF_Q6	13	13	1163	161	15983	-4.78	0	0.91	0.23	ACO2 C16orf33 C18orf1 DAPK3 DUSP10 FETUB FGFR1OP KCNA5 PIK4CB PPARD SARG SNN TMEM4
327	V$LXR_Q3	11	11	1165	128	16016	-4.8	0	1.07	0.27	ARSD BRD1 CDC42EP4 COX7C CYP3A4 CYP3A7 GJB5 PLA2R1 RPL28 TCTEL1 TRIM36
328	V$FXR_IR1_Q6	14	14	1162	190	15954	-4.81	0	0.65	0.2	DDX1 DHRS9 DUSP10 GNA14 GOT2 GPM6A MACF1 MAPKAPK2 PLA2R1 RGS3 SNN STS TM4SF3 ZNF20
329	V$FREAC3_01: Fork head RElated ACtivator-3	13	13	1163	168	15976	-4.83	0	0.78	0.22	ADAM18 BGR CRP ETV1 IL10RA ITPR1 MAPKAPK2 POMC PRDM2 RB1CC1 SLC11A1 TMSB10 UGT1A6
330	V$HMEF2_Q6: myocyte enhancer factor	7	7	1169	69	16075	-4.83	0	1.36	0.31	ASPH AVPR1A FETUB LTBP1 PAK3 SNN WFDC1
331	V$PBX1_02: homeo domain factor Pbx-1	12	12	1164	173	15971	-4.86	0	0.5	0.12	AGXT AKR1C4 CDC2L6 HMGN3 HRMT1L1 LILRB6 MGC5297 MKKS MRPL16 PTPRR SLCO1B3 THY1
332	V$IRF2_01: interferon regulatory factor 2	3	3	1173	20	16124	-5.01	0	1.6	0.33	FOXO3A MAT1A SP110
333	V$STAT1_01: signal transducer and activator of transcription 1	4	4	1172	84	16060	-5.01	0	0.15	0.05	GLRA3 LHCGR PCP4 SYNC1
334	V$SREBP1_02: sterol regulatory element-binding protein 1	5	5	1171	92	16052	-5.06	0	0.23	0.07	C11orf9 HS3ST2 MT1F RIBC2 RNASEH2A
335	V$AHR_01: aryl hydrocarbon / dioxin receptor	7	7	1169	85	16059	-5.09	0	0.83	0.23	CRYZ CTAG1B FLJ36754 MYCPBP POLG TTK UBE3B
336	V$PAX5_02: B-cell-specific activating protein	6	6	1170	72	16072	-5.19	0	0.83	0.23	ABCE1 ACAD8 C18orf1 FBXO3 ITM2A RBM8A
337	V$POU3F2_01	6	6	1170	78	16066	-5.22	0	0.67	0.21	ARHGAP19 ATP2B1 CLEC7A KLF9 MDH2 MRPS12
338	V$PAX3_01: Pax-3 binding sites	3	3	1173	28	16116	-5.38	0	1.04	0.26	CASP9 COLQ DDX28
339	V$APOLYA_B: Avian C-type PolyA signal	4	4	1172	58	16086	-5.41	0	0.49	0.11	COX7C SATB2 TU3A VCAM1
340	V$AR_02: high affinity binding sites for androgen receptor	3	3	1173	32	16112	-5.47	0	0.85	0.23	HTR2A SMOX SRD5A1
341	V$AHRARNT_02: aryl hydrocarbon receptor:Arnt heterodimers, fixed core	1	1	1175	31	16113	-5.61	0	0.11	0.04	CGI-12
342	V$SRF_01: serum response factor	2	2	1174	19	16125	-5.64	0	0.86	0.23	EGR1 VCL
343	V$GNCF_01: GCNF (germ cell nuclear factor)	2	2	1174	22	16122	-5.71	0	0.71	0.21	BTN2A2 ZNF20
344	V$NRSF_01: neuron-restrictive silencer factor	2	2	1174	22	16122	-5.71	0	0.71	0.21	C3orf14 GRIA2
345	V$HMX1_01: H6 homeobox 3	1	1	1175	27	16117	-5.75	0	0.15	0.05	HMGN4
346	V$TAXCREB_02: Tax/CREB complex	1	1	1175	25	16119	-5.82	0	0.17	0.05	PTPRT
347	V$BEL1_B: Bel-1 similar region	1	1	1175	22	16122	-5.9	0	0.22	0.07	RNF11
348	V$NRSE_B: neural-restrictive-silencer-element	1	1	1175	22	16122	-5.9	0	0.22	0.07	RPS6KB2
349	V$STAT3_01: signal transducer and activator of transcription 3	1	1	1175	10	16134	-6.01	0	0.62	0.2	SYNC1
350	V$VJUN_01: v-Jun	1	1	1175	17	16127	-6.02	0	0.33	0.08	ABCE1
351	V$PPARA_01: PPAR:RXR heterodimers	1	1	1175	12	16132	-6.05	0	0.51	0.13	CDC34

## Sheet: Synapse
		OBS: All the values presented here, are normalised considering the 1372 probe-signature.
				Sample 1	Sample 2	Sample 3	Sample 4	Sample 5	Sample 6	Sample 7	Sample 8	Sample 9	Sample 10	Sample 11	Sample 12	Sample 13	Sample 14	Sample 15	Sample 16	Sample 17	Sample 18	Sample 19	Sample 20	Sample 21	Sample 22	Sample 23	Sample 24	Sample 25	Sample 26	Sample 27	Sample 28	Sample 29	Sample 30	Sample 31
				GSM21215	GSM21221	GSM21216	GSM21218	GSM21217	GSM21233	GSM21220	GSM21214	GSM21210	GSM21222	GSM21231	GSM21225	GSM21229	GSM21219	GSM21204	GSM21224	GSM21226	GSM21232	GSM21228	GSM21208	GSM21223	GSM21209	GSM21211	GSM21227	GSM21206	GSM21205	GSM21203	GSM21230	GSM21213	GSM21212	GSM21207
	MA position	Probe	Gene Symbol	0	0	1	0	0	1	0	2	2	1	0	1	3	0	1	2	0	0	1	3	2	2	2	2	3	1	3	2	3	3	3
Upregulation trend	9	SSPN	204964_S_AT	8.54025e-05	0.000295402	0.000297543	0.000220471	0.000188346	0.000196041	0.000102511	0.000340037	0.00037419	0.000488288	0.000394314	0.000330417	0.000538104	0.000331998	0.000226638	0.000585238	0.000241305	0.000256787	0.000511678	0.000905516	0.000338746	0.000465979	0.000335979	0.000194866	0.000300088	9.26501e-05	0.000379357	0.00024417	0.000440945	0.000698486	0.000406486
	10	SYNC1	221276_S_AT	5.07499e-05	8.15932e-05	5.98493e-05	8.90972e-05	8.16771e-05	7.62736e-05	6.94558e-05	0.000109368	0.000113701	0.000118437	0.00010754	0.000144485	0.000159233	0.000108592	9.95934e-05	0.000340089	0.000153097	0.000144581	0.000199589	0.000215591	0.000136873	0.000197725	0.000216838	9.22769e-05	0.000129329	5.06804e-05	0.000144327	0.000109981	0.00015838	0.000221084	0.000248958
	26	PPP1CC	200726_AT	0.00214117	0.00166967	0.0012189	0.00159929	0.0019432	0.00239893	0.00190583	0.00176708	0.00161809	0.00216644	0.001737	0.00162253	0.00275139	0.001847	0.00358227	0.00270246	0.00275805	0.00210482	0.00186451	0.00252123	0.00227228	0.00199591	0.00209763	0.00250286	0.00317584	0.000739705	0.00322564	0.00330487	0.00316024	0.00263943	0.00203471
	76	USH1C	211184_S_AT	0.000176594	0.000235661	0.000165534	0.000125207	0.000143682	0.000189295	0.000192044	0.000131901	0.000348401	0.000344152	0.000205674	0.000453248	0.00038648	0.00030404	7.55738e-05	0.000250547	0.000290884	0.000372059	0.000434649	0.000100715	0.000402049	0.000570596	0.00025373	0.000258518	0.000384535	0.000389078	0.000393427	0.000292134	0.000688764	0.00068633	0.000766961
	121	ICA1	207949_S_AT	0.000109747	8.42658e-05	4.87001e-05	0.000134376	2.2514e-05	5.37328e-05	2.49747e-05	0.000169901	9.23716e-05	2.1388e-05	3.00841e-05	4.19789e-05	5.68353e-05	2.28435e-05	4.17623e-05	0.000123731	2.41216e-05	2.95637e-05	3.5559e-05	4.75088e-05	2.98694e-05	1.97028e-05	2.13633e-05	1.85798e-05	5.26274e-05	3.61626e-05	3.5573e-05	6.79107e-05	0.000110213	4.01712e-05	4.28453e-05
	125	HOMER3	215489_X_AT	0.000606461	0.000343666	0.000261928	0.000231588	0.000285979	0.000335493	0.000293249	0.000289711	0.000353591	0.00032716	0.000436093	0.000295538	0.00074365	0.000380157	0.000573708	0.000381818	0.000476647	0.000254145	0.000414443	0.000994165	0.000273831	0.00040504	0.000282078	0.000361729	0.000435202	0.000461579	0.000498023	0.000395496	0.000655948	0.000463346	0.000755186
	127	GABRA5	217280_X_AT	0.000364844	0.00014833	0.000176915	0.000185416	0.000137999	0.000130641	0.000167069	2.61446e-05	0.000102266	0.000114802	0.000225843	8.40465e-05	0.000199346	7.82476e-05	0.000254424	0.000132385	0.000148735	9.49105e-05	0.000121059	0.000345633	0.000248374	0.000130858	0.000132946	0.000105167	0.000219934	0.000315345	0.000181228	0.000259131	0.000279899	0.000199432	0.000550755
	159	CHRNA9	221107_AT	7.70764e-05	0.000136696	7.2005e-05	8.53646e-05	0.000102807	0.000202708	0.000133525	0.000178145	0.000128055	0.000175162	0.000113811	9.6649e-05	0.000158763	0.00017627	0.000130308	9.87963e-05	0.000129598	0.000104879	0.000118765	0.000315133	0.000137806	9.11035e-05	0.000121442	0.000145527	0.000156669	0.000310153	0.000131496	0.000117688	0.000214452	0.000220324	0.000265186
	200	ITGB1	216178_X_AT	3.40183e-05	5.188e-06	4.3745e-05	3.14031e-05	4.0365e-05	1.60325e-05	4.1298e-05	3.06983e-05	3.67378e-05	5.91762e-06	3.10163e-05	9.14128e-06	7.88179e-05	6.2223e-06	1.60689e-05	4.60136e-05	4.05884e-05	7.15663e-06	6.35297e-06	5.80663e-05	3.38576e-05	2.74618e-05	2.5143e-05	9.46772e-05	5.65465e-05	1.68055e-05	6.90223e-06	5.25878e-06	9.94585e-05	8.756e-05	5.60057e-05
	281	CASK	211208_S_AT	0.000477921	0.00044436	0.000449605	0.000446135	0.000307327	0.000349462	0.000478192	0.000388715	0.000467616	0.000434269	0.000510498	0.000515284	0.000576526	0.000520969	0.000575298	0.000669981	0.00076041	0.000709614	0.000768797	0.00055871	0.000705919	0.000439651	0.000653307	0.000670564	0.000946267	0.000580009	0.000548727	0.000858903	0.000683892	0.000782912	0.000964663
	327	GRIK3	207454_AT	5.94725e-06	8.41085e-06	9.91036e-06	9.41282e-06	7.35896e-06	8.09564e-06	1.16712e-05	1.07562e-05	1.43545e-05	1.3526e-05	7.37273e-06	7.10002e-06	1.55005e-05	8.94989e-06	2.10904e-05	2.69912e-05	1.39745e-05	1.35465e-05	6.79414e-06	1.36577e-05	1.31527e-05	1.91797e-05	9.28483e-06	3.38704e-05	5.9719e-06	1.45178e-05	2.2388e-05	9.33886e-06	2.27964e-05	2.22224e-05	7.61915e-05
	390	DLG1	217208_S_AT	0.000193484	7.98638e-05	9.61615e-05	0.000101594	6.6522e-05	7.00035e-05	9.07577e-05	6.87768e-05	9.60211e-05	0.000138811	0.00011254	0.000244862	0.000136217	0.000102625	0.000174247	0.000159034	0.000175883	4.48141e-05	0.000124589	0.00026863	0.000102591	0.0001945	0.000189558	0.000193888	0.000165907	0.000252346	0.000425461	0.00020745	0.000187519	0.000171511	0.000226101
	396	DLGAP2	216916_S_AT	1.25289e-05	9.35413e-06	9.21354e-06	9.98084e-06	7.21323e-06	2.65886e-05	8.3249e-06	2.77934e-05	1.45167e-05	1.5893e-05	1.13557e-05	1.37563e-05	2.2922e-05	1.27856e-05	1.19679e-05	2.0479e-05	1.51316e-05	1.84028e-05	1.76471e-05	1.96906e-05	1.4765e-05	2.33644e-05	2.35818e-05	3.28037e-05	1.41833e-05	4.85687e-05	5.10588e-05	4.15262e-05	2.06822e-05	1.60495e-05	6.28332e-05
	401	SNPH	215917_AT	1.74453e-06	1.39133e-05	3.48411e-06	5.51786e-06	3.71591e-06	1.97629e-05	3.4279e-06	3.06198e-06	1.40301e-05	2.25715e-05	4.74567e-06	2.43176e-05	4.5938e-05	8.18275e-06	6.69536e-06	2.74196e-06	2.13623e-06	4.68589e-06	5.91179e-06	7.22268e-05	3.69124e-05	3.0426e-05	8.46316e-06	6.13402e-06	4.2923e-06	1.9797e-05	3.76968e-05	1.81337e-06	6.41608e-05	5.45113e-05	0.000127547
	468	CTBP2	210835_S_AT	0.0013352	0.00131288	0.00149646	0.000992404	0.00180462	0.00134562	0.0017066	0.00166666	0.00184516	0.00105646	0.00139141	0.00230147	0.00127086	0.00205728	0.00209406	0.00220694	0.00287902	0.0018718	0.00196086	0.00304433	0.00254	0.00328574	0.00353481	0.00190448	0.00291018	0.00346061	0.00295123	0.00271679	0.00258868	0.00328378	0.0045802
	591	CHRNA1	211039_AT	8.72264e-06	1.04546e-05	8.98127e-06	9.08824e-06	9.18048e-06	2.26995e-05	1.81189e-05	5.30743e-05	1.84094e-05	2.60375e-05	1.51692e-05	9.14128e-06	1.25883e-05	1.2956e-05	3.8582e-05	1.07965e-05	2.03832e-05	3.19492e-05	1.61471e-05	0.000134818	1.02676e-05	2.85952e-05	1.05173e-05	4.59607e-05	3.81642e-05	3.22032e-05	0.000122559	3.91688e-05	2.9047e-05	4.27354e-05	2.70133e-05
	631	GABRQ	220886_AT	7.91381e-05	8.82747e-05	9.30645e-05	9.35602e-05	5.32614e-05	0.00018239	0.000127077	0.000141165	0.000167307	0.000207201	3.61857e-05	7.65027e-05	0.000126729	9.46983e-05	0.000131145	0.000125959	0.000251986	6.34725e-05	0.000249354	0.000167077	0.0001328	0.000109935	0.000111911	8.35649e-05	0.000118971	0.000173422	0.000258391	0.000177166	0.000279164	0.000129821	0.00023936
	668	CDK5R1	204996_S_AT	1.62558e-05	3.04206e-05	1.01426e-05	1.33078e-05	1.77052e-05	9.73064e-05	2.08122e-05	6.59504e-06	9.08308e-06	3.89718e-05	2.67791e-05	2.84001e-05	3.01556e-05	8.43846e-06	6.10114e-05	1.6109e-05	1.50426e-05	7.86377e-05	2.06471e-05	9.54365e-05	6.53393e-05	6.00673e-05	1.06817e-05	2.40916e-05	2.96729e-05	5.89511e-05	4.13249e-05	9.13939e-05	3.33673e-05	6.45779e-05	0.000100929
	775	GLRA3	216021_S_AT	1.53043e-05	3.72593e-05	6.49593e-05	4.22766e-05	8.35715e-05	6.63525e-05	8.40652e-06	9.65702e-05	4.85782e-05	6.06979e-05	1.23726e-05	1.88151e-05	8.07907e-05	9.6744e-05	5.94213e-05	5.17545e-05	6.08826e-05	0.000151397	1.96765e-05	0.000121579	1.31527e-05	5.49237e-05	0.000180684	4.96055e-05	6.94234e-05	1.42539e-05	0.000207244	8.05137e-05	0.000163344	8.39512e-05	0.000133681
	822	CHRNB3	217086_AT	3.33046e-06	2.594e-06	1.47107e-06	1.6229e-06	2.40441e-06	2.14296e-06	3.59113e-06	3.76859e-06	4.54154e-06	2.0289e-06	7.79645e-06	2.66251e-06	7.13964e-06	5.36993e-06	3.43137e-06	8.82569e-06	2.84831e-06	3.74871e-06	1.56177e-05	2.37125e-05	2.7154e-06	3.66158e-06	1.0353e-05	7.52973e-05	2.70602e-06	9.76653e-06	9.9109e-06	1.51416e-05	5.87375e-05	2.10828e-05	6.3328e-06
Dowregulation trend	875	MCTP1	220122_AT	0.00133211	0.00106936	0.00229177	0.000367993	0.0035358	0.000203343	0.00144045	0.00119849	0.000119134	0.000329189	0.00232588	0.00092247	0.00142023	0.00152267	0.0014944	0.000886168	0.00031545	0.00181676	0.000946062	0.000284466	0.00219616	0.000200951	0.00014675	0.00024705	0.000238036	0.000214952	0.00127868	0.00102664	0.000991827	0.00113325	0.000582914
	894	ELOVL2	213712_AT	0.000315204	0.00034571	0.000287323	0.000227693	0.000332756	0.000290729	0.00036099	0.000313578	0.000322449	0.000399101	0.000357789	0.000572972	0.000303717	0.000289209	0.000318699	0.000531941	0.000333608	0.000380409	0.00065762	0.00026444	0.000549698	0.000356742	0.000195064	0.000206334	0.000231225	0.000140339	9.72507e-05	0.000196025	0.000316484	0.000311208	4.00747e-05
	919	PPT1	200975_AT	0.00304087	0.00273368	0.00305626	0.00271252	0.0021639	0.00402782	0.0034119	0.00242006	0.00301104	0.00299043	0.00258283	0.00322581	0.00350547	0.00392218	0.00319728	0.00390832	0.00306665	0.00284195	0.00322925	0.00233011	0.00303904	0.00297529	0.00284083	0.00233457	0.00247293	0.00267902	0.00240003	0.00293059	0.00255255	0.00255386	0.00159725
	931	GABBR2	209990_S_AT	0.00459009	0.00435391	0.00474412	0.00592748	0.00558486	0.00395639	0.00372955	0.005328	0.00441851	0.00349655	0.00338807	0.00246699	0.00277798	0.00304543	0.00457142	0.00194285	0.00298165	0.00286342	0.0021871	0.00400984	0.00384398	0.00278794	0.00273278	0.00237804	0.00317257	0.00189585	0.00255621	0.000964351	0.00141659	0.000995259	0.00149147
	952	COLQ	206073_AT	1.67316e-05	0.000197537	0.000123802	0.000152877	6.47734e-05	0.000170405	0.000162091	0.000229492	0.000220508	9.09623e-05	0.000216775	0.000179009	0.000114328	0.000201159	7.09708e-05	0.000141897	0.000135918	0.000194081	0.000139589	9.49338e-05	8.25651e-05	0.000282116	0.000104845	0.000109434	0.000138287	0.000207033	2.44233e-05	0.000167737	0.000109386	0.000148434	5.90731e-05
	965	FAIM2	203619_S_AT	0.00148309	0.00215412	0.00270948	0.00264817	0.00205235	0.00206296	0.00204115	0.00210994	0.00223152	0.00221691	0.002278	0.00291731	0.00212874	0.00248713	0.0018624	0.00110441	0.00302651	0.00128691	0.00144733	0.00161002	0.00184876	0.00181213	0.00166552	0.00196306	0.00180949	0.00123217	0.00167025	0.00172143	0.00108807	0.00187209	0.00146357
	983	SHANK2	213308_AT	0.00076109	0.000907665	0.00100474	0.000840095	0.000940926	0.000996002	0.000869789	0.000841338	0.000749273	0.000887728	0.000664902	0.000449786	0.000664832	0.000802421	0.000841272	0.000505464	0.000910747	0.000596045	0.000534443	0.000847282	0.000889887	0.000652633	0.000690035	0.000859918	0.000583567	0.000775779	0.000539701	0.000483082	0.0004096	0.000425644	0.000350976
	999	ITPR1	203710_AT	0.00196933	0.00139321	0.00160741	0.00179193	0.00134173	0.00109632	0.00116973	0.00145248	0.00108973	0.00112858	0.00104074	0.000816769	0.000908895	0.00123372	0.00150252	0.000742129	0.000673447	0.000978498	0.0015938	0.000896047	0.00112494	0.000812696	0.00138558	0.0011267	0.000939175	0.00106042	0.000919147	0.000927539	0.000536083	0.000627735	0.000337419
	1000	NEFM	205113_AT	0.00524373	0.0051645	0.0041344	0.003433	0.00432765	0.00737989	0.00335534	0.0045304	0.00407441	0.00251795	0.00222284	0.00274806	0.00168834	0.00150554	0.0024808	0.0016283	0.00159096	0.00247602	0.0024188	0.00146289	0.0019029	0.00177578	0.00215005	0.00176713	0.0016265	0.00171002	0.00151194	0.000940958	0.000791715	0.00067047	0.000672563
	1005	NRXN1	209915_S_AT	0.000677987	0.000629163	0.000535624	0.000799684	0.000365106	0.000386368	0.00043567	0.000313892	0.000266491	0.000550508	0.000436601	0.000298378	0.000314238	0.000169622	0.000311501	0.000339918	0.000397339	0.000316681	0.000333619	0.000215088	0.000293433	0.000249772	8.93973e-05	0.000262429	0.000285718	5.68395e-05	4.59264e-05	3.88968e-05	0.0002139	3.66574e-05	7.37177e-05
	1042	KIAA0528	212943_AT	0.000639924	0.000960095	0.000858021	0.00121531	0.000749448	0.00105831	0.000956058	0.00121631	0.00082802	0.000795329	0.000833203	0.000714262	0.000770142	0.000688118	0.000904124	0.000882398	0.00080714	0.000806825	0.000723532	0.000398672	0.000811564	0.00048821	0.000657415	0.000875742	0.000629662	0.000417233	0.000497315	0.000578737	0.000569266	0.000696681	0.000474564
	1056	DMD	203881_S_AT	0.000991288	0.000768768	0.000756052	0.00120444	0.00122217	0.000757498	0.000789315	0.000733148	0.000483998	0.000888912	0.000802018	0.000642108	0.000581787	0.0006149	0.000806958	0.000873058	0.000615769	0.000856239	0.000813091	0.000797259	0.000714404	0.000495795	0.000694472	0.000685854	0.00075106	0.000267744	0.000562355	0.000495776	0.000696853	0.000724127	0.000369182
	1112	LZTS1	219042_AT	0.000352236	0.000454108	0.000244817	0.000235239	0.000157963	0.00033208	0.000262561	0.000571491	0.0003454	0.000209399	0.00040211	0.000200132	6.08748e-05	0.000299011	0.000159852	9.14273e-05	0.000140457	0.000270333	0.000196854	0.000139845	0.000189993	0.000347588	0.000127194	0.000290432	0.00016544	0.000211608	0.000103091	0.000119048	5.68991e-05	5.08076e-05	0.000180089
	1132	PSD3	203354_S_AT	0.000411312	0.000526347	0.00101403	0.000689814	0.000932183	0.000358034	0.00045942	0.000603995	0.000553257	0.000753398	0.000546175	0.000206522	0.000384038	0.000480822	0.000427415	0.000496124	0.000383988	0.000438514	0.000524914	0.000758213	0.00049556	0.000294408	0.000359068	0.00022927	0.000169919	0.00033391	0.000378738	0.000372738	0.00023541	0.000194493	0.00033267
	1137	SV2B	205551_AT	0.00405032	0.00410591	0.0032945	0.00446192	0.00419818	0.00390559	0.00316379	0.00364289	0.00331119	0.00289718	0.00218809	0.00203424	0.00347992	0.0024105	0.00318088	0.00126713	0.00181945	0.00272889	0.0021406	0.00214535	0.00222264	0.00269335	0.00227347	0.00183754	0.00215362	0.0023855	0.00159627	0.000865975	0.00126483	0.000592882	0.00132276
	1142	CABP1	208321_S_AT	0.00332769	0.00126045	0.000938233	0.00176117	0.000781798	0.000983938	0.000840733	0.00139006	0.00104553	0.000686951	0.000643716	0.000493008	0.000352755	0.000721105	0.00278	0.000306671	0.000597077	0.000879839	0.000717444	0.000947243	0.000409007	0.000724731	0.000905147	0.000533926	0.000230945	0.000630073	0.000448291	0.000247616	0.000862954	0.000189935	0.000618932
	1150	RIMS2	206137_AT	0.000491957	0.00060228	0.000424133	0.00100742	0.000641176	0.000470896	0.000673909	0.00075788	0.000617974	0.00056843	0.000391433	0.000485375	0.000599166	0.000608166	0.00099719	0.000330749	0.000716973	0.000673916	0.000424678	0.00013951	0.000349438	0.000411579	0.000523976	0.00028172	0.000425778	0.00056206	0.000272992	0.000383709	0.000315013	0.000349955	0.000104788
	1159	GRIA2	205358_AT	0.00681008	0.00617593	0.00720708	0.00639601	0.0115025	0.00567631	0.00610582	0.00699435	0.0059572	0.00537827	0.00544794	0.00523662	0.0045968	0.00624063	0.00709398	0.00466673	0.00505967	0.00695241	0.00584385	0.00848715	0.00748236	0.00733719	0.00851057	0.00644525	0.00694206	0.00634209	0.00480953	0.00368531	0.00366305	0.00430953	0.00380512
	1168	RAB3B	205924_AT	0.000293239	4.73209e-05	0.000261308	0.000168133	4.85983e-05	8.49249e-05	0.000149522	1.09132e-05	0.000100319	6.96589e-05	0.000164149	7.18877e-06	5.60838e-05	7.76509e-05	6.2769e-05	9.08275e-06	2.66139e-05	1.37169e-05	1.63236e-05	2.82371e-05	0.000158257	0.000193105	3.23736e-05	1.87576e-05	2.0715e-05	4.12658e-05	1.62822e-05	2.99206e-05	1.20416e-05	1.44351e-05	1.90973e-05
	1204	NRG1	206343_S_AT	0.000156611	0.000147701	0.000141532	0.000182171	0.000133918	0.000278109	0.000110509	0.000198087	0.000142815	6.62774e-05	0.00010271	0.000134368	4.45288e-05	8.43846e-05	0.000149976	8.93708e-05	6.04376e-05	2.73485e-05	6.36179e-05	1.80986e-05	6.78849e-05	8.50009e-05	2.7608e-05	1.45794e-05	1.62361e-05	0.000213544	1.54858e-05	1.71364e-05	3.06097e-05	7.46444e-05	4.3538e-05
	1206	NUFIP1	205136_S_AT	0.000427885	0.000612263	0.00043985	0.000378379	0.000376473	0.000459705	0.000423999	0.000453487	0.000405332	0.00050714	0.000399822	0.000447568	0.000428379	0.000421412	0.000472692	0.000442998	0.000506554	0.000526183	0.000384178	0.000493354	0.000399673	0.000395538	0.000340581	0.000437827	0.000422699	0.00043923	0.000373428	0.000379267	0.000361525	0.000444448	0.000427068
	1213	CADPS2	219572_AT	0.00154391	0.00126917	0.00134092	0.00147359	0.000888685	0.000510105	0.0007512	0.000813859	0.000406954	0.00146968	0.000840068	0.000776742	0.000800579	0.0007373	0.000490937	0.000387474	0.00065253	0.000778794	0.00082315	0.000708191	0.000664678	0.000357178	0.00043688	0.000593755	0.000486617	0.00104783	0.000576602	0.000881842	0.000575058	0.000595351	0.000492672

## Sheet: Calcium signalling pathway 
		OBS: All the values presented here, are normalised considering the 1372 probe-signature.
				Sample 1	Sample 2	Sample 3	Sample 4	Sample 5	Sample 6	Sample 7	Sample 8	Sample 9	Sample 10	Sample 11	Sample 12	Sample 13	Sample 14	Sample 15	Sample 16	Sample 17	Sample 18	Sample 19	Sample 20	Sample 21	Sample 22	Sample 23	Sample 24	Sample 25	Sample 26	Sample 27	Sample 28	Sample 29	Sample 30	Sample 31
				GSM21215	GSM21221	GSM21216	GSM21218	GSM21217	GSM21233	GSM21220	GSM21214	GSM21210	GSM21222	GSM21231	GSM21225	GSM21229	GSM21219	GSM21204	GSM21224	GSM21226	GSM21232	GSM21228	GSM21208	GSM21223	GSM21209	GSM21211	GSM21227	GSM21206	GSM21205	GSM21203	GSM21230	GSM21213	GSM21212	GSM21207
				0	0	1	0	0	1	0	2	2	1	0	1	3	0	1	2	0	0	1	3	2	2	2	2	3	1	3	2	3	3	3
Upregulation trend	239	AVPR1A	206250_x_at	9.35701e-06	1.32844e-05	8.59414e-06	1.1766e-05	5.24599e-06	1.57151e-05	1.30587e-05	9.73553e-06	1.17593e-05	1.30188e-05	1.63556e-05	7.86327e-05	2.16068e-05	1.24446e-05	1.68221e-05	8.31157e-06	1.36185e-05	1.16721e-05	1.09412e-05	8.89009e-05	6.61878e-06	2.00515e-05	1.61868e-05	1.19124e-05	8.86454e-06	2.76279e-05	2.74319e-05	1.6139e-05	3.04258e-05	1.69992e-05	2.46385e-05
	258	ATP2A3	213036_x_at	1.22117e-05	1.61929e-05	1.56398e-05	1.07923e-05	1.53008e-05	2.42076e-05	1.51807e-05	1.63306e-05	1.49222e-05	3.6013e-05	3.51688e-05	2.52051e-05	2.73373e-05	4.52609e-05	1.78264e-05	6.72638e-05	3.34676e-05	1.73804e-05	3.29119e-05	7.52432e-05	2.91905e-05	4.01902e-05	3.0073e-05	2.11579e-05	2.32344e-05	5.01525e-05	3.04406e-05	4.13449e-05	3.04258e-05	5.41314e-05	6.25364e-05
	299	ADCY2	217687_at	0.000126637	0.000108634	9.12837e-05	0.00014882	0.000123718	0.000158103	0.000116222	9.50784e-05	0.0001107	0.000113957	0.000157454	0.000134102	0.000178303	0.000112854	0.000173577	0.000131614	0.000154699	0.000193485	0.000122383	0.000276003	0.000153165	0.000181074	0.000185368	0.000199311	0.000229078	0.000236684	0.000200607	0.000138451	0.000157369	0.000301617	0.000252223
	309	PTAFR	206278_at	9.5156e-06	3.79668e-05	1.2388e-05	1.54987e-05	8.9619e-06	6.26222e-05	1.31403e-05	6.19462e-05	7.84226e-05	5.51184e-05	8.98287e-06	5.36939e-05	6.01233e-05	2.21616e-05	0.000122358	6.26367e-05	9.87117e-05	3.05861e-05	9.74121e-05	0.000177634	0.000103694	0.000206007	6.78696e-05	6.56073e-05	5.58e-05	7.75164e-05	0.000109462	3.46354e-05	0.000137422	0.000134094	0.000179594
	408	AGTR1	205357_s_at	7.84244e-05	6.97236e-05	6.0159e-05	4.14651e-05	4.94726e-05	0.00013834	6.5783e-05	8.48718e-05	9.56967e-05	0.000106855	7.7795e-05	6.54089e-05	9.24396e-05	5.34436e-05	8.75418e-05	0.000142839	8.2779e-05	0.000159661	9.50298e-05	9.83692e-05	8.46016e-05	0.00012955	6.46651e-05	0.000126414	0.00016656	6.31745e-05	0.00012247	0.000101095	0.000171341	0.000105224	0.000303578
	450	PHKA2	209439_s_at	9.15877e-05	0.000133945	0.000185742	0.000214791	0.000250059	0.000210328	0.000216203	0.000346553	0.000292443	0.000258431	0.000347535	0.000328731	0.000225556	0.000293727	0.000288737	0.000414465	0.000398229	0.000336532	0.000240972	0.000373367	0.000289784	0.000509046	0.000272218	0.000390977	0.000405436	0.000260881	0.00037803	0.000256864	0.000497476	0.000513584	0.0007068
	477	NFATC1	210162_s_at	0.000142813	0.000128128	0.00011846	0.00014809	0.000191333	0.000120403	0.000199553	0.000106306	0.000188879	0.00020568	0.000219233	0.000224183	0.000227529	0.000273867	0.000289993	0.000218843	0.000256793	0.000113143	0.000192883	0.000182159	0.000212734	0.000232685	0.000330885	0.00018002	0.000420086	0.000334526	0.000424841	0.000223226	0.000341119	0.000370468	0.000563916
	535	PLCE1	214159_at	3.49698e-05	1.72933e-06	3.46863e-05	3.87062e-05	2.71043e-05	8.09564e-06	2.29343e-05	4.1062e-05	5.70125e-05	6.39103e-05	5.24566e-05	3.97601e-05	6.49144e-05	5.34436e-05	3.01291e-05	6.9663e-05	5.66992e-05	3.5272e-05	1.95883e-05	0.000233522	5.29503e-05	8.13393e-05	6.6555e-05	9.07657e-05	4.57224e-05	8.37634e-05	0.000112206	4.66943e-05	0.000175018	0.000142831	9.99395e-05
	539	LHCGR *	215306_at	9.5156e-05	8.12001e-05	5.92299e-05	6.77561e-05	0.000121605	0.000130641	9.87562e-05	0.000128996	0.000284333	0.00022115	0.000231944	0.000114932	0.000414381	0.000192209	0.000487673	0.000137527	0.000254301	0.000268885	0.000132618	0.000531478	0.000231573	0.000481497	0.000222754	0.000275497	0.000679117	0.000111831	0.000626776	0.000549089	0.000418057	0.000692408	0.000633577
	544	TTN	208195_at	9.83279e-05	8.23006e-05	6.945e-05	0.000102567	0.000113736	0.000113815	0.000102347	0.000107012	8.75868e-05	0.000146757	7.99984e-05	0.000128777	0.000152845	6.29902e-05	0.0001673	0.000155349	0.000169296	0.000250226	0.000219089	0.000190622	9.42752e-05	0.000217079	0.000121196	0.000202511	0.000245128	0.000138491	0.000279275	0.000163657	0.000399856	0.000311398	0.00026578
	639	ITPR2	211360_s_at	9.76142e-05	7.2239e-05	8.05217e-05	0.000104109	7.14766e-05	8.62741e-05	0.000102592	0.00016731	0.000168037	9.72181e-05	2.43215e-05	0.000130995	2.56463e-05	0.000166724	0.000186298	0.000114306	4.84213e-05	0.000112632	6.35297e-05	0.000182578	0.000139334	0.000133822	0.000107967	0.000169886	0.000131475	0.000301531	0.000180343	0.000221594	0.000234307	0.000179014	0.00041836
	663	TBXA2R	207554_x_at	0.000176197	0.000102345	0.000136422	9.41282e-05	0.000155558	0.000193343	0.000104306	0.000192355	0.000110619	0.000146334	0.000134743	0.000166762	0.000233072	0.000143113	0.000103025	0.000161861	0.000107168	0.000236595	0.000219266	0.000246258	0.000196103	0.000188484	0.000125386	0.00010659	0.000193434	0.000238092	0.000390242	6.89081e-05	0.000346266	0.000189365	0.00021769
	742	SYK	207540_s_at	2.13308e-05	1.72147e-05	1.37042e-05	1.34701e-05	4.15307e-06	1.73024e-05	1.72211e-05	1.05207e-05	2.20589e-05	3.11098e-05	2.35588e-05	2.35188e-05	1.89764e-05	0.000107399	2.61119e-05	1.21675e-05	1.91371e-05	9.11618e-06	2.50589e-05	3.08346e-05	3.13119e-05	2.19695e-05	1.91448e-05	2.76475e-05	2.65936e-05	3.22032e-05	7.84908e-05	1.8315e-05	3.64926e-05	3.54229e-05	3.88873e-05
	828	CREBBP	211808_s_at	5.32874e-05	1.91799e-05	1.54075e-05	2.126e-05	1.01277e-05	3.23826e-05	3.12592e-05	7.76487e-05	6.86097e-05	1.48786e-05	1.4915e-05	4.05589e-05	5.09169e-05	1.89226e-05	0.00013215	4.5071e-05	2.25194e-05	2.54742e-05	3.15884e-05	3.29294e-05	3.10574e-05	2.61541e-05	3.38526e-05	8.91655e-05	7.9221e-05	5.05924e-05	0.000226977	4.46996e-05	2.94147e-05	6.9991e-05	6.76818e-05
Dwownregulation trend	913	ATP2B2	216120_s_at	0.00019388	0.000242185	0.000252714	0.000300723	0.000245396	0.000246361	0.00021555	0.000237971	0.000230726	0.000163495	0.000197115	0.000137829	0.000144766	0.000189993	0.000195086	0.000170259	0.000108236	0.000264966	0.000199148	0.000178472	0.000260678	0.000289788	0.000249458	0.000202423	0.000162268	0.000153977	7.75174e-05	0.000164835	0.000224747	0.000108358	0.000121412
	966	PPP3R1	204506_at	0.000774174	0.00146954	0.00165279	0.00125101	0.000971236	0.000633444	0.000944794	0.000646235	0.00110935	0.00102612	0.000845491	0.000809757	0.000962724	0.000813161	0.000379878	0.000555933	0.000798239	0.00117539	0.000814327	0.000634205	0.000842622	0.000775644	0.000587245	0.000840716	0.00065243	0.000633681	0.000743671	0.000521435	0.000555111	0.000589558	0.000801
	974	PPP3CA	202457_s_at	0.00720585	0.00699335	0.00836806	0.00561102	0.0113257	0.00442403	0.00910964	0.00599253	0.00519122	0.00703901	0.00621284	0.00479873	0.00511499	0.00724336	0.0044581	0.00446957	0.00464328	0.00637485	0.00500287	0.00681755	0.00503579	0.00379139	0.00417538	0.00540451	0.00520881	0.00481833	0.00380985	0.00290031	0.00213606	0.00263791	0.00209437
	986	ATP2B1	212930_at	0.00351364	0.0026469	0.00277343	0.00227936	0.00448146	0.00203883	0.00231538	0.00232522	0.00208546	0.00235733	0.001627	0.00103376	0.000978413	0.00158166	0.00280828	0.00143233	0.00120127	0.00213498	0.00225671	0.00205402	0.00259227	0.00170743	0.0015808	0.00198715	0.00122816	0.000568747	0.00187918	0.000679379	0.00122999	0.000686425	0.000523643
	990	PLCB1	213222_at	0.00536379	0.00505414	0.00438874	0.00494263	0.00491046	0.00437585	0.00437857	0.00398717	0.00395276	0.00410683	0.00455381	0.00303766	0.00254303	0.00362394	0.00317845	0.00226709	0.00338121	0.00368762	0.00331298	0.00449381	0.00386011	0.00241969	0.00295463	0.00318649	0.00351036	0.00229575	0.0022365	0.00156512	0.00183198	0.0015341	0.000836523
	999	ITPR1	203710_at	0.00196933	0.00139321	0.00160741	0.00179193	0.00134173	0.00109632	0.00116973	0.00145248	0.00108973	0.00112858	0.00104074	0.000816769	0.000908895	0.00123372	0.00150252	0.000742129	0.000673447	0.000978498	0.0015938	0.000896047	0.00112494	0.000812696	0.00138558	0.0011267	0.000939175	0.00106042	0.000919147	0.000927539	0.000536083	0.000627735	0.000337419
	1009	GNAS	211858_x_at	0.0121663	0.0099671	0.00807826	0.0121517	0.00727852	0.00990938	0.0117058	0.00698783	0.00818742	0.0112408	0.00865406	0.00887591	0.00758493	0.00893079	0.0087746	0.00635124	0.00884836	0.00662482	0.00496105	0.00935982	0.00480235	0.00579227	0.00905698	0.00462549	0.00919449	0.00271879	0.00772953	0.00575537	0.00509481	0.0038156	0.00139114
	1094	SLC8A2	215267_s_at	0.000469674	0.000795022	0.000857014	0.000653055	0.000622815	0.000427482	0.000638814	0.000807735	0.000921608	0.000937013	0.000304062	0.000328021	0.000343266	0.000708746	0.000579232	0.000580525	0.00035862	0.000691467	0.000565767	0.000557202	0.000967021	0.000739639	0.000469254	0.000628425	0.000581981	0.00107273	0.00045307	0.000608477	0.000479	0.000610071	0.0003769
	1115	GRM5	214217_at	0.0015826	0.0014998	0.00167067	0.00150078	0.0014562	0.00101973	0.000969198	0.00105214	0.000805555	0.00133003	0.000656766	0.000771772	0.000645762	0.00076074	0.00079273	0.00064916	0.000973677	0.000958562	0.000747973	0.000854739	0.000816656	0.000704069	0.000818051	0.000873342	0.000913235	0.00101968	0.000751812	0.000531862	0.000724889	0.000487278	0.000844835
	1124	PRKCB1	209685_s_at	0.005759	0.00469978	0.00585935	0.00452708	0.00853967	0.0036901	0.00412303	0.00369722	0.0048592	0.0039654	0.00301316	0.00337952	0.00143883	0.00545193	0.00385259	0.00176068	0.00378567	0.00435029	0.00425058	0.00550281	0.0040955	0.00447445	0.00510485	0.00391706	0.0017452	0.00500953	0.0043285	0.00315128	0.00274448	0.0023306	0.00265661
	1203	ATP2B4	212135_s_at	0.000945217	0.00126163	0.00201343	0.00173082	0.00107127	0.00132419	0.00115161	0.00144447	0.00110951	0.00128159	0.00106447	0.000919186	0.000604427	0.00107705	0.00102146	0.00130817	0.00129153	0.00095967	0.00109245	0.00102131	0.00121183	0.000955585	0.000956419	0.000819113	0.00100533	0.00106367	0.000493333	0.000935699	0.00109551	0.000951859	0.000900445
	1214	CALM3	200622_x_at	0.00172875	0.00177021	0.00183922	0.00110057	0.00106086	0.00174834	0.00082947	0.000987528	0.00117674	0.00134989	0.00106913	0.00118668	0.0012795	0.00107526	0.000587015	0.000880513	0.00120003	0.000947316	0.00132574	0.000847198	0.000980937	0.00103065	0.000830211	0.000985087	0.000646645	0.00134761	0.000618989	0.000905144	0.000860196	0.000647868	0.000938639
	1218	SLC25A6	212826_s_at	0.00169124	0.00193906	0.00159356	0.00144844	0.00143492	0.00124038	0.00157479	0.00168456	0.00197078	0.00165719	0.00183717	0.00124801	0.00181535	0.00171548	0.00119696	0.00136284	0.00182915	0.00130992	0.0014168	0.00106271	0.00131086	0.00172391	0.00146232	0.00153128	0.00100235	0.0017124	0.00124833	0.00187457	0.00146862	0.00181473	0.00141657
	1286	CALM1	213710_s_at	0.000737539	0.000470615	0.000460754	0.000412541	0.000153737	0.000414624	0.000535324	0.000361628	0.00039487	0.000682725	0.000911592	0.000419611	0.000432888	0.000405132	0.000129639	0.000412151	0.000404727	0.000376319	0.000544414	0.000361553	0.000585932	0.000114468	0.00045093	0.000406534	0.00036158	0.000342972	8.088e-05	0.000672579	0.000156817	0.000284902	0.000170095
	1337	TNNC2	205388_at	0.000109271	8.89035e-05	0.000104446	9.13693e-05	0.000117889	8.13532e-05	0.000100144	0.000134884	9.96705e-05	6.28113e-05	0.000136862	0.000119103	9.29093e-05	0.000118309	0.000125287	0.00012176	0.000151494	0.000143047	0.000106677	5.57202e-05	8.21408e-05	0.000133386	3.6975e-05	0.000197978	0.000140246	0.000177469	4.29177e-05	8.44124e-05	0.000103411	0.000106838	5.75889e-05
	1341	GNA14	220108_at	0.00018825	0.000212708	0.000266806	0.000202457	0.000237672	0.000282792	0.000286393	0.000238992	0.000161873	0.000343729	0.00027974	8.99928e-05	0.000176236	0.000290743	0.00031669	0.000233752	0.000315094	0.000388673	0.000282354	0.000463273	0.00032432	0.00034227	0.000343292	0.000320925	0.000124757	0.000238004	5.18552e-05	0.000277899	8.59461e-05	0.000271132	7.67852e-05
	1349	ADORA2B	205891_at	0.000340421	0.000312066	0.000285775	0.000350222	0.000305943	0.000270331	0.00030141	0.000284058	0.000257408	0.000465971	0.000613377	0.000228266	0.000178115	0.00035416	0.000272501	0.000215758	0.000395381	0.000408865	0.000340942	0.000298794	0.000505573	0.000281593	0.000212647	0.000279587	0.00025082	0.000478208	0.000355819	0.000172452	0.000460708	0.000284617	0.000115771
	1370	HTR2A	211616_s_at	0.00013195	0.000143142	0.000139442	0.000144925	0.000179019	0.000103577	0.000110917	0.00011557	0.000144113	0.000115055	0.000146183	9.04365e-05	9.31911e-05	0.000167491	0.000116583	9.27126e-05	0.000200272	0.00019783	0.000171089	2.40477e-05	9.6142e-05	0.000154658	0.000105913	0.000184643	8.98585e-05	0.000392333	0.000249985	9.10312e-05	0.000143213	0.000140457	0.000138629
NOTE:
LHCGR	215306_at	Using the affymetrix's Analysis centre, this probe was not recognized as LHCGR, as GATHER did.

## Sheet: Neuroactive ligand-receptor
		OBS: All the values presented here, are normalised considering the 1372 probe-signature.
				Sample 1	Sample 2	Sample 3	Sample 4	Sample 5	Sample 6	Sample 7	Sample 8	Sample 9	Sample 10	Sample 11	Sample 12	Sample 13	Sample 14	Sample 15	Sample 16	Sample 17	Sample 18	Sample 19	Sample 20	Sample 21	Sample 22	Sample 23	Sample 24	Sample 25	Sample 26	Sample 27	Sample 28	Sample 29	Sample 30	Sample 31
				GSM21215	GSM21221	GSM21216	GSM21218	GSM21217	GSM21233	GSM21220	GSM21214	GSM21210	GSM21222	GSM21231	GSM21225	GSM21229	GSM21219	GSM21204	GSM21224	GSM21226	GSM21232	GSM21228	GSM21208	GSM21223	GSM21209	GSM21211	GSM21227	GSM21206	GSM21205	GSM21203	GSM21230	GSM21213	GSM21212	GSM21207
	MA position	Gene Symbol	Probe ID	0	0	1	0	0	1	0	2	2	1	0	1	3	0	1	2	0	0	1	3	2	2	2	2	3	1	3	2	3	3	3
upregulation trend	239	AVPR1A	206250_x_at	9.35701e-06	1.32844e-05	8.59414e-06	1.1766e-05	5.24599e-06	1.57151e-05	1.30587e-05	9.73553e-06	1.17593e-05	1.30188e-05	1.63556e-05	7.86327e-05	2.16068e-05	1.24446e-05	1.68221e-05	8.31157e-06	1.36185e-05	1.16721e-05	1.09412e-05	8.89009e-05	6.61878e-06	2.00515e-05	1.61868e-05	1.19124e-05	8.86454e-06	2.76279e-05	2.74319e-05	1.6139e-05	3.04258e-05	1.69992e-05	2.46385e-05
	309	PTAFR	206278_at	9.5156e-06	3.79668e-05	1.2388e-05	1.54987e-05	8.9619e-06	6.26222e-05	1.31403e-05	6.19462e-05	7.84226e-05	5.51184e-05	8.98287e-06	5.36939e-05	6.01233e-05	2.21616e-05	0.000122358	6.26367e-05	9.87117e-05	3.05861e-05	9.74121e-05	0.000177634	0.000103694	0.000206007	6.78696e-05	6.56073e-05	5.58e-05	7.75164e-05	0.000109462	3.46354e-05	0.000137422	0.000134094	0.000179594
	408	AGTR1	205357_s_at	7.84244e-05	6.97236e-05	6.0159e-05	4.14651e-05	4.94726e-05	0.00013834	6.5783e-05	8.48718e-05	9.56967e-05	0.000106855	7.7795e-05	6.54089e-05	9.24396e-05	5.34436e-05	8.75418e-05	0.000142839	8.2779e-05	0.000159661	9.50298e-05	9.83692e-05	8.46016e-05	0.00012955	6.46651e-05	0.000126414	0.00016656	6.31745e-05	0.00012247	0.000101095	0.000171341	0.000105224	0.000303578
	539	LHCGR	215306_at	9.5156e-05	8.12001e-05	5.92299e-05	6.77561e-05	0.000121605	0.000130641	9.87562e-05	0.000128996	0.000284333	0.00022115	0.000231944	0.000114932	0.000414381	0.000192209	0.000487673	0.000137527	0.000254301	0.000268885	0.000132618	0.000531478	0.000231573	0.000481497	0.000222754	0.000275497	0.000679117	0.000111831	0.000626776	0.000549089	0.000418057	0.000692408	0.000633577
	663	TBXA2R	207554_x_at	0.000176197	0.000102345	0.000136422	9.41282e-05	0.000155558	0.000193343	0.000104306	0.000192355	0.000110619	0.000146334	0.000134743	0.000166762	0.000233072	0.000143113	0.000103025	0.000161861	0.000107168	0.000236595	0.000219266	0.000246258	0.000196103	0.000188484	0.000125386	0.00010659	0.000193434	0.000238092	0.000390242	6.89081e-05	0.000346266	0.000189365	0.00021769
Downregulation trend	1115	GRM5	214217_at	0.0015826	0.0014998	0.00167067	0.00150078	0.0014562	0.00101973	0.000969198	0.00105214	0.000805555	0.00133003	0.000656766	0.000771772	0.000645762	0.00076074	0.00079273	0.00064916	0.000973677	0.000958562	0.000747973	0.000854739	0.000816656	0.000704069	0.000818051	0.000873342	0.000913235	0.00101968	0.000751812	0.000531862	0.000724889	0.000487278	0.000844835
	1349	ADORA2B	205891_at	0.000340421	0.000312066	0.000285775	0.000350222	0.000305943	0.000270331	0.00030141	0.000284058	0.000257408	0.000465971	0.000613377	0.000228266	0.000178115	0.00035416	0.000272501	0.000215758	0.000395381	0.000408865	0.000340942	0.000298794	0.000505573	0.000281593	0.000212647	0.000279587	0.00025082	0.000478208	0.000355819	0.000172452	0.000460708	0.000284617	0.000115771
	1370	HTR2A	211616_s_at	0.00013195	0.000143142	0.000139442	0.000144925	0.000179019	0.000103577	0.000110917	0.00011557	0.000144113	0.000115055	0.000146183	9.04365e-05	9.31911e-05	0.000167491	0.000116583	9.27126e-05	0.000200272	0.00019783	0.000171089	2.40477e-05	9.6142e-05	0.000154658	0.000105913	0.000184643	8.98585e-05	0.000392333	0.000249985	9.10312e-05	0.000143213	0.000140457	0.000138629
NOTE:
LHCGR	215306_at	Using the affymetrix's Analysis centre, this probe was not recognized as LHCGR, as GATHER did.

## Sheet: Wnt Signalling
OBS: All the values presented here, are normalised considering the 1372 probe-signature.
				Sample 1	Sample 2	Sample 3	Sample 4	Sample 5	Sample 6	Sample 7	Sample 8	Sample 9	Sample 10	Sample 11	Sample 12	Sample 13	Sample 14	Sample 15	Sample 16	Sample 17	Sample 18	Sample 19	Sample 20	Sample 21	Sample 22	Sample 23	Sample 24	Sample 25	Sample 26	Sample 27	Sample 28	Sample 29	Sample 30	Sample 31
				GSM21215	GSM21221	GSM21216	GSM21218	GSM21217	GSM21233	GSM21220	GSM21214	GSM21210	GSM21222	GSM21231	GSM21225	GSM21229	GSM21219	GSM21204	GSM21224	GSM21226	GSM21232	GSM21228	GSM21208	GSM21223	GSM21209	GSM21211	GSM21227	GSM21206	GSM21205	GSM21203	GSM21230	GSM21213	GSM21212	GSM21207
	MA position	Gene Symbol	Probe ID	0	0	1	0	0	1	0	2	2	1	0	1	3	0	1	2	0	0	1	3	2	2	2	2	3	1	3	2	3	3	3
Upregulation trend	98	CSNK2A2	203575_at	0.000303151	0.000303262	0.000274238	0.000320929	0.000272791	0.000325492	0.000303206	0.000443045	0.000317583	0.000284722	0.000312706	0.000331305	0.000257967	0.000269264	0.000355272	0.000306329	0.000438818	0.000311995	0.000373854	0.000392304	0.000317192	0.000415328	0.000543696	0.000376131	0.000504346	0.000350627	0.000366969	0.000381624	0.000435797	0.000415293	0.00044577
	419	TCF7L2	212761_at	0.00104561	0.00125573	0.00104694	0.00143862	0.00181584	0.00144952	0.00157667	0.00206189	0.00158905	0.00178721	0.00132328	0.00158446	0.00160313	0.00162368	0.00221131	0.00162059	0.00182568	0.00180245	0.00192689	0.00155363	0.00204512	0.00243905	0.00324607	0.00176322	0.00243952	0.00267119	0.00228482	0.00221993	0.00378622	0.00422453	0.00282938
	434	TLE3	212769_at	7.23186e-05	3.6316e-05	5.29585e-05	6.81618e-05	8.10214e-05	6.94479e-05	6.84764e-05	6.97975e-05	9.88595e-05	6.47557e-05	9.98285e-05	7.09115e-05	9.507e-05	9.47836e-05	6.9548e-05	0.000103338	6.88045e-05	0.000166647	0.000106589	0.000122501	0.00013543	0.000178284	9.44094e-05	9.16546e-05	0.000166373	0.000189348	0.000137337	0.000147971	0.000279256	0.000138652	0.000116959
	464	SOX2	213721_at	0.000639211	0.000551972	0.00048375	0.000591547	0.000746242	0.000801945	0.000696925	0.00066971	0.000684961	0.000789834	0.000598208	0.000676721	0.000589772	0.000911098	0.00130032	0.00114246	0.00101008	0.000997157	0.000870621	0.00120942	0.000643974	0.00105741	0.00122494	0.00111426	0.00117152	0.0011609	0.00116657	0.000995269	0.00107538	0.00108453	0.00243803
	585	FZD5	206136_at	8.72264e-06	4.71637e-06	1.42461e-05	1.24963e-05	1.38436e-05	2.32551e-05	1.52623e-05	1.20909e-05	7.70439e-06	1.56394e-05	1.23726e-05	2.32526e-05	1.43732e-05	1.4746e-05	2.72836e-05	1.00253e-05	2.23414e-05	1.09053e-05	2.62942e-05	2.1115e-05	2.10443e-05	2.59798e-05	1.65155e-05	2.22247e-05	2.2208e-05	3.36989e-05	3.07946e-05	2.44805e-05	3.80553e-05	2.0323e-05	3.92831e-05
	595	TCF7L1	221016_s_at	0.000271988	0.000233224	0.00022848	0.000271106	0.000165904	0.000452483	0.000319448	0.000405438	0.000334209	0.000380334	0.00031796	0.000261725	0.000317432	0.00039388	0.000389335	0.000346944	0.000591291	0.000351953	0.000384354	0.000508939	0.000289444	0.000418815	0.000482893	0.000278964	0.000474206	0.000526425	0.00047882	0.000531227	0.000511356	0.000569995	0.000784376
	605	FRAT1	219889_at	0.000223934	0.00016806	0.000145326	0.000220309	0.000172462	0.00017731	0.000161438	0.000215202	0.000166496	0.000243722	0.000214063	0.000190636	0.000293101	0.000180788	0.000346485	0.000184054	0.000315005	0.000386713	0.000247677	0.000417105	0.000288256	0.000228674	0.000234175	0.000268385	0.000272841	0.000368401	0.000388029	0.000245258	0.000328342	0.000279204	0.000511373
	701	MDFIC	211675_s_at	0.000175087	0.000206577	0.000183109	0.000221039	0.000192426	0.000132943	0.000273824	0.000352206	0.000426256	0.000578574	0.000255164	0.000393962	0.000373892	0.000249403	0.000409923	0.000608973	0.000409534	0.000396682	0.000629649	0.000540276	0.000620977	0.000472082	0.000435072	0.000293722	0.00069414	0.000462898	0.000374756	0.000525878	0.000562924	0.000983008	0.000522357
	828	CREBBP	211808_s_at	5.32874e-05	1.91799e-05	1.54075e-05	2.126e-05	1.01277e-05	3.23826e-05	3.12592e-05	7.76487e-05	6.86097e-05	1.48786e-05	1.4915e-05	4.05589e-05	5.09169e-05	1.89226e-05	0.00013215	4.5071e-05	2.25194e-05	2.54742e-05	3.15884e-05	3.29294e-05	3.10574e-05	2.61541e-05	3.38526e-05	8.91655e-05	7.9221e-05	5.05924e-05	0.000226977	4.46996e-05	2.94147e-05	6.9991e-05	6.76818e-05
	843	PIAS4	212879_x_at	1.83175e-05	1.10049e-05	1.67237e-05	2.67779e-05	2.97273e-05	1.75406e-05	1.40381e-05	2.04917e-05	2.14912e-05	1.28497e-05	2.39826e-05	3.52339e-05	5.0823e-05	1.78145e-05	3.14682e-05	1.81655e-05	3.14204e-05	2.35998e-05	1.71177e-05	2.1534e-05	1.80744e-05	4.22825e-05	0.000153076	2.80031e-05	3.94705e-05	1.75974e-05	4.4599e-05	4.66943e-05	2.75763e-05	5.50811e-05	0.000258754
Downregulation trend	966	PPP3R1	204506_at	0.000774174	0.00146954	0.00165279	0.00125101	0.000971236	0.000633444	0.000944794	0.000646235	0.00110935	0.00102612	0.000845491	0.000809757	0.000962724	0.000813161	0.000379878	0.000555933	0.000798239	0.00117539	0.000814327	0.000634205	0.000842622	0.000775644	0.000587245	0.000840716	0.00065243	0.000633681	0.000743671	0.000521435	0.000555111	0.000589558	0.000801
	974	PPP3CA	202457_s_at	0.00720585	0.00699335	0.00836806	0.00561102	0.0113257	0.00442403	0.00910964	0.00599253	0.00519122	0.00703901	0.00621284	0.00479873	0.00511499	0.00724336	0.0044581	0.00446957	0.00464328	0.00637485	0.00500287	0.00681755	0.00503579	0.00379139	0.00417538	0.00540451	0.00520881	0.00481833	0.00380985	0.00290031	0.00213606	0.00263791	0.00209437
	990	PLCB1	213222_at	0.00536379	0.00505414	0.00438874	0.00494263	0.00491046	0.00437585	0.00437857	0.00398717	0.00395276	0.00410683	0.00455381	0.00303766	0.00254303	0.00362394	0.00317845	0.00226709	0.00338121	0.00368762	0.00331298	0.00449381	0.00386011	0.00241969	0.00295463	0.00318649	0.00351036	0.00229575	0.0022365	0.00156512	0.00183198	0.0015341	0.000836523
	1008	PPP2CA	208652_at	0.003842	0.0025995	0.00235425	0.00316693	0.00246343	0.00240361	0.0027979	0.00210994	0.00224701	0.00233061	0.00217445	0.00218317	0.00227867	0.0020462	0.00248381	0.00189795	0.00243949	0.00155299	0.0020858	0.00212415	0.00176348	0.00192067	0.0020402	0.0015928	0.00232764	0.00113925	0.00153424	0.001646	0.00168326	0.00127959	0.00051078
	1124	PRKCB1	209685_s_at	0.005759	0.00469978	0.00585935	0.00452708	0.00853967	0.0036901	0.00412303	0.00369722	0.0048592	0.0039654	0.00301316	0.00337952	0.00143883	0.00545193	0.00385259	0.00176068	0.00378567	0.00435029	0.00425058	0.00550281	0.0040955	0.00447445	0.00510485	0.00391706	0.0017452	0.00500953	0.0043285	0.00315128	0.00274448	0.0023306	0.00265661
	1282	CSNK1G3	220768_s_at	0.000251133	0.000360488	0.000210982	0.000361745	0.000205978	0.000190803	0.00032108	0.000219285	0.000245081	0.00033629	0.000320756	0.000326335	0.000355291	0.000326458	0.000190399	0.000291162	0.000345714	0.000227393	0.00022456	0.000244247	0.000258811	0.000218823	0.000239023	0.000254962	0.000307366	0.000279358	0.000202908	0.000336743	0.000126483	0.000279394	0.000230949

## Sheet: Phosphatidylinositol signalling
OBS: All the values presented here, are normalised considering the 1372 probe-signature.
				Sample 1	Sample 2	Sample 3	Sample 4	Sample 5	Sample 6	Sample 7	Sample 8	Sample 9	Sample 10	Sample 11	Sample 12	Sample 13	Sample 14	Sample 15	Sample 16	Sample 17	Sample 18	Sample 19	Sample 20	Sample 21	Sample 22	Sample 23	Sample 24	Sample 25	Sample 26	Sample 27	Sample 28	Sample 29	Sample 30	Sample 31
				GSM21215	GSM21221	GSM21216	GSM21218	GSM21217	GSM21233	GSM21220	GSM21214	GSM21210	GSM21222	GSM21231	GSM21225	GSM21229	GSM21219	GSM21204	GSM21224	GSM21226	GSM21232	GSM21228	GSM21208	GSM21223	GSM21209	GSM21211	GSM21227	GSM21206	GSM21205	GSM21203	GSM21230	GSM21213	GSM21212	GSM21207
	MA position	Gene Symbol	Probe ID	0	0	1	0	0	1	0	2	2	1	0	1	3	0	1	2	0	0	1	3	2	2	2	2	3	1	3	2	3	3	3
Upregulation trend	19	CSNK1A1	208865_at	0.00210009	0.00170709	0.00226614	0.00261279	0.00203843	0.00242941	0.00268804	0.00300765	0.00267067	0.00231776	0.00245953	0.00257367	0.00269089	0.00302779	0.00237292	0.00284984	0.00257799	0.00276714	0.00275145	0.0031086	0.0030785	0.00298079	0.00381623	0.00336766	0.00399446	0.0025012	0.00443619	0.00303023	0.00439014	0.00405369	0.00198988
	32	TBL1X	201869_s_at	2.11722e-05	2.16167e-05	2.2608e-05	2.20714e-05	1.55922e-05	3.76209e-05	2.59541e-05	7.91404e-05	2.79791e-05	3.12789e-05	1.07625e-05	2.66251e-05	1.38096e-05	2.76168e-05	2.33501e-05	0.000112849	2.65249e-05	7.18219e-05	5.0912e-05	5.55526e-05	2.99542e-05	4.11492e-05	4.85605e-05	3.13813e-05	0.00015359	4.6721e-05	4.31832e-05	1.91311e-05	3.81472e-05	5.09975e-05	4.20537e-05
	98	CSNK2A2	203575_at	0.000303151	0.000303262	0.000274238	0.000320929	0.000272791	0.000325492	0.000303206	0.000443045	0.000317583	0.000284722	0.000312706	0.000331305	0.000257967	0.000269264	0.000355272	0.000306329	0.000438818	0.000311995	0.000373854	0.000392304	0.000317192	0.000415328	0.000543696	0.000376131	0.000504346	0.000350627	0.000366969	0.000381624	0.000435797	0.000415293	0.00044577
	192	SMAD3	205398_s_at	2.12515e-05	2.08306e-05	2.74083e-05	1.76896e-05	1.81424e-05	3.77003e-05	2.50563e-05	3.4938e-05	0.000161468	3.22088e-05	2.93214e-05	4.35764e-05	3.72952e-05	2.36959e-05	3.21377e-05	3.39318e-05	3.51588e-05	2.46222e-05	2.61177e-05	5.00225e-05	3.3603e-05	3.06875e-05	1.64333e-05	1.53795e-05	3.3312e-05	6.29985e-05	5.68107e-05	4.66036e-05	4.66958e-05	3.76071e-05	4.90792e-05
	214	PIK3R4	216752_at	1.98242e-06	5.65964e-06	2.55502e-06	1.86634e-06	4.37166e-06	2.85728e-05	6.03963e-06	4.31818e-06	2.15723e-05	1.77529e-06	3.22027e-05	2.92876e-05	8.45484e-06	1.25298e-05	2.71162e-05	3.17039e-06	4.89553e-06	2.55594e-06	3.73237e-05	4.28166e-05	1.04373e-05	1.77848e-05	3.03195e-05	4.43605e-05	1.69826e-05	1.3022e-05	2.90248e-05	4.68756e-05	7.16983e-06	1.98482e-05	4.76939e-05
	296	PTEN	222176_at	1.25289e-05	1.01402e-05	7.12307e-06	3.48924e-06	1.39893e-05	1.39689e-05	2.59541e-05	5.7314e-06	1.13538e-05	5.29205e-05	6.69478e-06	3.79851e-05	8.06967e-05	1.63655e-05	1.62362e-05	4.35286e-05	1.41525e-05	1.22685e-05	1.16471e-05	0.000138588	1.51893e-05	5.45749e-05	1.78302e-05	1.97355e-05	6.21451e-05	1.39899e-05	1.47779e-05	2.73819e-05	3.54815e-05	3.15292e-05	1.91963e-05
	363	CDIPT	201253_s_at	0.00252052	0.00142458	0.00163931	0.00163645	0.00391708	0.0012599	0.00168604	0.00168872	0.00236914	0.00137238	0.00123726	0.00151994	0.00221423	0.0018106	0.0030309	0.00163661	0.00161864	0.00200743	0.00163977	0.00232114	0.00182449	0.0040368	0.00232679	0.00209401	0.0021915	0.00326343	0.00416691	0.00204693	0.00250549	0.00244266	0.00435884
	391	VANGL1	219330_at	6.37545e-05	6.52431e-05	5.79137e-05	5.79376e-05	3.14031e-05	1.13498e-05	5.42751e-05	2.47314e-05	8.39374e-05	0.000102798	0.000108896	9.33653e-05	7.00812e-05	4.9267e-05	8.74581e-05	8.76571e-05	7.73494e-05	4.48993e-05	4.61472e-05	0.000166825	4.38706e-05	8.59599e-05	0.000108378	8.98767e-05	9.02317e-05	0.000142891	0.000178308	0.000116872	0.000201491	8.62305e-05	0.000260436
	419	TCF7L2	212761_at	0.00104561	0.00125573	0.00104694	0.00143862	0.00181584	0.00144952	0.00157667	0.00206189	0.00158905	0.00178721	0.00132328	0.00158446	0.00160313	0.00162368	0.00221131	0.00162059	0.00182568	0.00180245	0.00192689	0.00155363	0.00204512	0.00243905	0.00324607	0.00176322	0.00243952	0.00267119	0.00228482	0.00221993	0.00378622	0.00422453	0.00282938
	468	CTBP2	210835_s_at	0.0013352	0.00131288	0.00149646	0.000992404	0.00180462	0.00134562	0.0017066	0.00166666	0.00184516	0.00105646	0.00139141	0.00230147	0.00127086	0.00205728	0.00209406	0.00220694	0.00287902	0.0018718	0.00196086	0.00304433	0.00254	0.00328574	0.00353481	0.00190448	0.00291018	0.00346061	0.00295123	0.00271679	0.00258868	0.00328378	0.0045802
	512	SKIP	202782_s_at	0.000400528	0.000521001	0.000408802	0.000455629	0.000366928	0.000482167	0.000384823	0.000591041	0.000448558	0.0004095	0.000472448	0.000527798	0.000612412	0.000571855	0.000394189	0.000438457	0.0005564	0.000474893	0.000636267	0.000583344	0.00037761	0.000492482	0.000393003	0.000561574	0.00061044	0.00108514	0.000653146	0.000603853	0.000756509	0.000720803	0.00102403
	574	PPARD	37152_at	0.00100199	0.000983441	0.0011239	0.00081356	0.00163784	0.00142523	0.00104959	0.00116112	0.00142945	0.00132504	0.00116082	0.000998618	0.00167829	0.00157876	0.0019727	0.00125993	0.00106776	0.00195896	0.0013928	0.0017802	0.00186938	0.00220392	0.00147678	0.00195853	0.00172467	0.00236623	0.00136531	0.00202055	0.00221419	0.00207789	0.00261287
	585	FZD5	206136_at	8.72264e-06	4.71637e-06	1.42461e-05	1.24963e-05	1.38436e-05	2.32551e-05	1.52623e-05	1.20909e-05	7.70439e-06	1.56394e-05	1.23726e-05	2.32526e-05	1.43732e-05	1.4746e-05	2.72836e-05	1.00253e-05	2.23414e-05	1.09053e-05	2.62942e-05	2.1115e-05	2.10443e-05	2.59798e-05	1.65155e-05	2.22247e-05	2.2208e-05	3.36989e-05	3.07946e-05	2.44805e-05	3.80553e-05	2.0323e-05	3.92831e-05
	595	TCF7L1	221016_s_at	0.000271988	0.000233224	0.00022848	0.000271106	0.000165904	0.000452483	0.000319448	0.000405438	0.000334209	0.000380334	0.00031796	0.000261725	0.000317432	0.00039388	0.000389335	0.000346944	0.000591291	0.000351953	0.000384354	0.000508939	0.000289444	0.000418815	0.000482893	0.000278964	0.000474206	0.000526425	0.00047882	0.000531227	0.000511356	0.000569995	0.000784376
	605	FRAT1	219889_at	0.000223934	0.00016806	0.000145326	0.000220309	0.000172462	0.00017731	0.000161438	0.000215202	0.000166496	0.000243722	0.000214063	0.000190636	0.000293101	0.000180788	0.000346485	0.000184054	0.000315005	0.000386713	0.000247677	0.000417105	0.000288256	0.000228674	0.000234175	0.000268385	0.000272841	0.000368401	0.000388029	0.000245258	0.000328342	0.000279204	0.000511373
	651	PIP5K1A	207391_s_at	0.000590681	0.000762165	0.000778815	0.000646158	0.000420553	0.000524867	0.000502269	0.000736995	0.000564367	0.00077766	0.000452957	0.000685773	0.00058733	0.000719741	0.000732305	0.000514032	0.00112579	0.000601753	0.000587738	0.00088926	0.000916022	0.00113361	0.000653471	0.000590999	0.00129282	0.00131672	0.00110613	0.000445817	0.00170955	0.00115423	0.00143567
	708	CCND3	201700_at	0.000765055	0.00111479	0.00118475	0.00114179	0.00101226	0.000898378	0.00121233	0.00141848	0.000914147	0.000849179	0.000863372	0.00104637	0.0011414	0.00121199	0.000829471	0.000845553	0.00115179	0.00108218	0.00125806	0.00132446	0.00112927	0.00111861	0.00141951	0.0010739	0.00196504	0.00123542	0.00165963	0.00088964	0.00142671	0.00151824	0.00156935
	716	PIK3R1	212249_at	0.000113077	0.000227486	0.000165999	0.000218605	0.000201679	0.000216201	0.00014136	0.000250297	0.000169172	0.000243468	0.000226182	0.000175282	0.000305032	0.000232356	0.000279447	0.000327493	0.00012043	0.000119192	0.000416296	0.000259748	0.000321181	0.000252736	0.000343621	0.000370797	0.000191008	0.000622331	0.000294053	0.000540929	0.000219783	0.000331152	0.000599538
	755	PIK3C3	204297_at	0.000209343	0.000218211	0.000196349	0.000233698	0.000272864	0.000215804	0.000304593	0.000193062	0.000289766	0.000317269	0.000290503	0.0004126	0.000344676	0.000212411	0.000299952	0.00043323	0.000298716	0.000324604	0.000331942	0.000323009	0.000367088	0.000285777	0.000209771	0.000421114	0.00051573	0.000400076	0.000474573	0.000271824	0.000549687	0.000421181	0.000384124
	844	PI4KB	206138_s_at	0.000719221	0.000811923	0.00102386	0.00122553	0.0011241	0.00109363	0.00105979	0.00137844	0.00121113	0.000861775	0.0011737	0.0014011	0.00134385	0.00137956	0.00121588	0.000873572	0.00117039	0.00116755	0.00119242	0.00094121	0.00135108	0.00151633	0.0013942	0.00119462	0.00160047	0.000822061	0.00163698	0.00123391	0.00149666	0.00167409	0.00286599
Downregulation trend	876	TTK	204822_at	4.69436e-05	2.56256e-05	3.86349e-05	2.90499e-05	6.92908e-05	3.04777e-05	3.40341e-05	4.60082e-05	3.26018e-05	2.72211e-05	6.28801e-05	1.88151e-05	4.13348e-05	5.20798e-05	2.17599e-05	4.65277e-05	5.98145e-05	9.13322e-05	3.17648e-05	1.69255e-05	3.72519e-05	1.20309e-05	2.96621e-05	4.99611e-05	2.84598e-05	3.05314e-05	3.81393e-05	3.60861e-05	4.37544e-05	4.57743e-05	1.10824e-05
	1008	PPP2CA	208652_at	0.003842	0.0025995	0.00235425	0.00316693	0.00246343	0.00240361	0.0027979	0.00210994	0.00224701	0.00233061	0.00217445	0.00218317	0.00227867	0.0020462	0.00248381	0.00189795	0.00243949	0.00155299	0.0020858	0.00212415	0.00176348	0.00192067	0.0020402	0.0015928	0.00232764	0.00113925	0.00153424	0.001646	0.00168326	0.00127959	0.00051078
	1152	PIP4K2C	218942_at	0.000926978	0.000941859	0.0012477	0.0011026	0.00113	0.00121808	0.00112802	0.0012025	0.00104626	0.00103051	0.000740409	0.00104566	0.000855254	0.000969656	0.00119755	0.000624996	0.00118908	0.000886996	0.000826768	0.000769274	0.000925611	0.000882876	0.000934892	0.000630648	0.000809006	0.00102223	0.000747299	0.000996085	0.000674332	0.000804849	0.000727084
	1157	PIP5K1C	212518_at	0.00237414	0.00165544	0.00209325	0.00165512	0.00215515	0.00157913	0.00169151	0.00192944	0.00185562	0.00156504	0.00177471	0.00159759	0.00121675	0.00205762	0.00207648	0.00100382	0.00193133	0.00188483	0.00155912	0.00210287	0.00202501	0.00218021	0.00203929	0.00180953	0.00178924	0.00217336	0.00194475	0.00151262	0.00173841	0.00179488	0.00121511
	1223	CTBP1	203392_s_at	0.00220366	0.00345034	0.00291976	0.00258828	0.00219406	0.00338017	0.00211697	0.00267217	0.00249712	0.00231227	0.00236427	0.00345159	0.00225838	0.00267141	0.0013343	0.00272542	0.00251524	0.00266482	0.00273028	0.00163139	0.00210282	0.00253111	0.00237305	0.00227714	0.00301133	0.00197266	0.00133257	0.00175734	0.00270018	0.00218416	0.00174528
	1240	PPP2R2B	213849_s_at	0.00217868	0.0020021	0.00185827	0.00182528	0.00210029	0.0014592	0.00172187	0.00147627	0.00150341	0.00151981	0.00125023	0.00159848	0.0018223	0.00115275	0.00119629	0.00202442	0.001163	0.0014896	0.00164648	0.00110242	0.00158299	0.00137379	0.00105559	0.00133722	0.00116881	0.000877492	0.00101357	0.00136103	0.000979326	0.000994119	0.00119908
	1282	CSNK1G3	220768_s_at	0.000251133	0.000360488	0.000210982	0.000361745	0.000205978	0.000190803	0.00032108	0.000219285	0.000245081	0.00033629	0.000320756	0.000326335	0.000355291	0.000326458	0.000190399	0.000291162	0.000345714	0.000227393	0.00022456	0.000244247	0.000258811	0.000218823	0.000239023	0.000254962	0.000307366	0.000279358	0.000202908	0.000336743	0.000126483	0.000279394	0.000230949
	1309	RBX1	218117_at	0.000859418	0.000900748	0.000846717	0.000835469	0.000671851	0.000878298	0.000848405	0.000825793	0.00101155	0.00117769	0.00115116	0.00138264	0.00149745	0.000961133	0.000720504	0.00109182	0.00116496	0.000849764	0.00103765	0.000586947	0.000907282	0.000713659	0.000708112	0.00102278	0.000763377	0.000375616	0.000610936	0.00100461	0.000480747	0.000827641	0.000852751

## Sheet: Insulin signalling
OBS: All the values presented here, are normalised considering the 1372 probe-signature.
				Sample 1	Sample 2	Sample 3	Sample 4	Sample 5	Sample 6	Sample 7	Sample 8	Sample 9	Sample 10	Sample 11	Sample 12	Sample 13	Sample 14	Sample 15	Sample 16	Sample 17	Sample 18	Sample 19	Sample 20	Sample 21	Sample 22	Sample 23	Sample 24	Sample 25	Sample 26	Sample 27	Sample 28	Sample 29	Sample 30	Sample 31
				GSM21215	GSM21221	GSM21216	GSM21218	GSM21217	GSM21233	GSM21220	GSM21214	GSM21210	GSM21222	GSM21231	GSM21225	GSM21229	GSM21219	GSM21204	GSM21224	GSM21226	GSM21232	GSM21228	GSM21208	GSM21223	GSM21209	GSM21211	GSM21227	GSM21206	GSM21205	GSM21203	GSM21230	GSM21213	GSM21212	GSM21207
	MA position	Gene Symbol	Probe ID	0	0	1	0	0	1	0	2	2	1	0	1	3	0	1	2	0	0	1	3	2	2	2	2	3	1	3	2	3	3	3
Upregulation trend	8	RHOQ	212122_at	0.000100231	8.81961e-05	0.00017436	0.000188743	9.58121e-05	0.000178501	0.000114018	0.000202326	0.000151331	0.000246427	9.59303e-05	0.000180962	0.000202634	0.00021045	0.000273171	0.000297332	0.000123812	0.000119533	0.000282442	0.00024852	0.000280195	0.000259972	0.000244199	0.000226603	0.000368952	0.000119222	0.000219013	0.000328039	0.000203145	0.000397344	0.000162179
	26	PPP1CC	200726_at	0.00214117	0.00166967	0.0012189	0.00159929	0.0019432	0.00239893	0.00190583	0.00176708	0.00161809	0.00216644	0.001737	0.00162253	0.00275139	0.001847	0.00358227	0.00270246	0.00275805	0.00210482	0.00186451	0.00252123	0.00227228	0.00199591	0.00209763	0.00250286	0.00317584	0.000739705	0.00322564	0.00330487	0.00316024	0.00263943	0.00203471
	57	MAPK1	208351_s_at	0.00016692	0.000167431	0.000166541	0.000171135	0.00011308	0.00015096	0.000134178	0.000149409	0.000202342	0.000181671	0.000207199	0.000146527	0.000276567	0.000197324	0.000155583	0.000216529	0.000166804	0.000249374	0.000108883	0.00020738	0.000229536	0.000177412	0.000156199	0.000152461	0.000292437	0.000170342	0.000159371	0.000250971	0.000249473	0.000241787	0.000338607
	107	RHEB	213409_s_at	0.000259538	0.000128128	0.000136422	6.61332e-05	0.000112716	0.000198026	8.93702e-05	0.000113372	0.000100644	7.07579e-05	0.000179149	0.000147769	0.000192864	8.36175e-05	0.00015391	0.000205904	0.000208372	0.00011178	0.000209913	0.000199336	0.000172343	0.00013853	0.000134918	0.000159573	0.000171692	9.45858e-05	0.000191316	0.000197657	0.000193953	0.000176924	0.000237084
	214	PIK3R4	216752_at	1.98242e-06	5.65964e-06	2.55502e-06	1.86634e-06	4.37166e-06	2.85728e-05	6.03963e-06	4.31818e-06	2.15723e-05	1.77529e-06	3.22027e-05	2.92876e-05	8.45484e-06	1.25298e-05	2.71162e-05	3.17039e-06	4.89553e-06	2.55594e-06	3.73237e-05	4.28166e-05	1.04373e-05	1.77848e-05	3.03195e-05	4.43605e-05	1.69826e-05	1.3022e-05	2.90248e-05	4.68756e-05	7.16983e-06	1.98482e-05	4.76939e-05
	246	PDE3A	206388_at	8.84951e-05	0.000114686	6.46496e-05	0.000106381	9.29706e-05	0.000145166	0.000113121	0.000143521	0.000112484	9.05396e-05	7.61849e-05	0.000106234	0.000156978	0.000127685	0.000102439	9.16844e-05	0.000150693	0.000350419	0.000156089	0.000148978	4.05613e-05	0.0002251	0.000189887	0.000104901	0.000144165	0.000168671	0.000146274	0.000212436	0.000340108	0.000222889	0.000363245
	328	EIF4E2	213570_at	9.4601e-05	4.38622e-05	0.000129919	8.80424e-05	5.2897e-05	0.000137785	0.000154745	0.000102066	0.000110294	0.000224701	9.85573e-05	0.000190014	0.000233354	0.000131265	0.000192743	0.000118076	0.000177129	0.000282431	0.000161559	0.000234611	0.000186429	0.00016172	9.22731e-05	0.000286343	0.000103575	6.6254e-05	0.000236623	7.42575e-05	0.000256	0.00033685	0.000314661
	389	PRKAR2A	204843_s_at	0.00011839	5.52601e-05	5.31133e-05	7.14076e-05	4.60481e-05	1.69056e-05	7.7291e-05	6.02975e-05	8.23154e-05	0.000121988	0.00012254	0.000153094	0.000147772	6.16264e-05	0.000173326	7.96883e-05	0.000121231	3.76575e-05	0.000128383	3.66999e-05	6.49998e-05	0.000142017	6.04746e-05	0.000167396	9.34976e-05	0.000384238	0.00033175	0.000250517	0.000138157	0.000155747	0.000385707
	421	FOXO1	202724_s_at	0.000260252	0.00023346	0.000249385	0.00037984	0.000298948	0.000295253	0.000354788	0.000482615	0.000406062	0.000512297	0.000409568	0.000460614	0.000510484	0.000461473	0.000533955	0.000422434	0.000413984	0.000643841	0.000462178	0.00053307	0.00051024	0.000562314	0.000690117	0.000547528	0.000560612	0.000545342	0.00075606	0.000721994	0.000859093	0.000800576	0.00079348
	450	PHKA2	209439_s_at	9.15877e-05	0.000133945	0.000185742	0.000214791	0.000250059	0.000210328	0.000216203	0.000346553	0.000292443	0.000258431	0.000347535	0.000328731	0.000225556	0.000293727	0.000288737	0.000414465	0.000398229	0.000336532	0.000240972	0.000373367	0.000289784	0.000509046	0.000272218	0.000390977	0.000405436	0.000260881	0.00037803	0.000256864	0.000497476	0.000513584	0.0007068
	473	INSR	213792_s_at	0.000384985	0.000440745	0.000451541	0.000442403	0.000859103	0.000394385	0.000638079	0.000595359	0.000519276	0.000378474	0.000389145	0.000622406	0.000508512	0.000733209	0.000781097	0.000397242	0.000722848	0.000453594	0.000579355	0.000915989	0.000546813	0.000911559	0.00115493	0.000701056	0.000934416	0.000960816	0.00159477	0.000927267	0.00103402	0.000862589	0.00273102
	512	SKIP	202782_s_at	0.000400528	0.000521001	0.000408802	0.000455629	0.000366928	0.000482167	0.000384823	0.000591041	0.000448558	0.0004095	0.000472448	0.000527798	0.000612412	0.000571855	0.000394189	0.000438457	0.0005564	0.000474893	0.000636267	0.000583344	0.00037761	0.000492482	0.000393003	0.000561574	0.00061044	0.00108514	0.000653146	0.000603853	0.000756509	0.000720803	0.00102403
	716	PIK3R1	212249_at	0.000113077	0.000227486	0.000165999	0.000218605	0.000201679	0.000216201	0.00014136	0.000250297	0.000169172	0.000243468	0.000226182	0.000175282	0.000305032	0.000232356	0.000279447	0.000327493	0.00012043	0.000119192	0.000416296	0.000259748	0.000321181	0.000252736	0.000343621	0.000370797	0.000191008	0.000622331	0.000294053	0.000540929	0.000219783	0.000331152	0.000599538
	738	RPS6KB2	203777_s_at	0.000100072	0.000149037	0.000126744	0.000124314	5.71958e-05	9.73858e-05	0.000157275	0.000212454	0.000160657	8.5721e-05	0.00012737	0.000139959	0.000275346	0.000215138	0.000168221	9.70826e-05	0.000151851	0.000192547	0.000228971	0.000225478	0.000119562	8.87497e-05	0.000145188	0.000116191	0.00012541	0.000254106	0.00024087	0.000246437	0.000264916	0.000318331	0.000665537
Downregulation trend	964	TSC2	215735_s_at	0.00012624	0.000357579	0.000503648	0.000416193	9.07847e-05	0.000234139	0.000310715	0.000374818	0.000419443	0.000311013	0.000312282	0.000524869	0.000328142	0.000322793	0.000101016	0.000309927	0.000313848	0.000298789	0.000179824	0.000247515	0.000202043	0.000282639	0.000299086	0.000296833	0.000310539	0.000209848	0.000116188	0.000351975	3.52057e-05	0.000228777	0.000139223
	987	PRKAR2B	203680_at	0.00209645	0.00182956	0.00176815	0.00202278	0.00183049	0.00130173	0.00112835	0.00178671	0.00111698	0.0013444	0.00137099	0.000852535	0.000767512	0.00115794	0.0012183	0.000899107	0.000923564	0.000994004	0.00103165	0.00117188	0.00114233	0.000960815	0.000914679	0.000938238	0.000629103	0.000705038	0.00126656	0.000832881	0.000584433	0.000659834	0.000456159
	1170	ACACA	212186_at	0.00245503	0.00152024	0.00154687	0.00166323	0.00166582	0.00205772	0.00205805	0.00211324	0.00223736	0.00183776	0.00157624	0.00226198	0.00108673	0.00175554	0.00238723	0.00131906	0.00177254	0.000636429	0.00123433	0.00104075	0.00144892	0.00220349	0.00157242	0.00136851	0.00163873	0.000994779	0.00156212	0.00135568	0.00216557	0.00156421	0.00150285
	1214	CALM3	200622_x_at	0.00172875	0.00177021	0.00183922	0.00110057	0.00106086	0.00174834	0.00082947	0.000987528	0.00117674	0.00134989	0.00106913	0.00118668	0.0012795	0.00107526	0.000587015	0.000880513	0.00120003	0.000947316	0.00132574	0.000847198	0.000980937	0.00103065	0.000830211	0.000985087	0.000646645	0.00134761	0.000618989	0.000905144	0.000860196	0.000647868	0.000938639
	1243	PRKCI	213518_at	0.000733891	0.000710442	0.000696203	0.000576698	0.000697644	0.000526852	0.000497454	0.000667512	0.000719834	0.000565556	0.000498125	0.000674946	0.000547874	0.000508524	0.000543663	0.000616941	0.000341174	0.000617344	0.000670944	0.000340438	0.000696075	0.000432851	0.000414202	0.000566019	0.000629103	0.000458587	0.000358562	0.000578375	0.000457307	0.000481865	0.000144665
	1286	CALM1	213710_s_at	0.000737539	0.000470615	0.000460754	0.000412541	0.000153737	0.000414624	0.000535324	0.000361628	0.00039487	0.000682725	0.000911592	0.000419611	0.000432888	0.000405132	0.000129639	0.000412151	0.000404727	0.000376319	0.000544414	0.000361553	0.000585932	0.000114468	0.00045093	0.000406534	0.00036158	0.000342972	8.088e-05	0.000672579	0.000156817	0.000284902	0.000170095

## Sheet: Probe ID
Gene Symbol	Probe ID	MA Position
ZFP36L2	201367_s_at	1
ZFP36L2	201368_at	2
AL049435	213817_at	3
KRCC1	218303_x_at	4
NUP160	212709_at	5
BRD1	204520_x_at	6
AU150728	219540_at	7
RHOQ	212122_at	8
SSPN	204964_s_at	9
SYNC1	221276_s_at	10
GMPR	204187_at	11
C1S	208747_s_at	12
DMN	212730_at	13
DYNLT1	201999_s_at	14
HIST1H1C	209398_at	15
MSX1	205932_s_at	16
AFF1	201924_at	17
SLC33A1	203164_at	18
CSNK1A1	208865_at	19
ALDH3A2	202054_s_at	20
FDFT1	208647_at	21
BIRC2	202076_at	22
SAP30	204900_x_at	23
TRIP4	203732_at	24
KPNA1	213741_s_at	25
PPP1CC	200726_at	26
MYCN	209757_s_at	27
HMGN3	209377_s_at	28
ARF6	214182_at	29
CPNE3	202118_s_at	30
MFAP1	203406_at	31
TBL1X	201869_s_at	32
CCDC121	220321_s_at	33
GPATCH3	218895_at	34
CYP2D6	217468_at	35
ALDOB	217238_s_at	36
SLC19A1	209777_s_at	37
AL110206	216465_at	38
AL109698	37590_g_at	39
FGFR3	204379_s_at	40
PLA2G2F	215870_s_at	41
FLJ22222	219254_at	42
U92992	217380_s_at	43
RAB7A	217268_at	44
FLJ20323	209672_s_at	45
GPC4	204984_at	46
DSP	200606_at	47
SLC47A1	219525_at	48
DLEC1	206798_x_at	49
P2RY10	214615_at	50
SPAG6	210033_s_at	51
EFCAB1	220156_at	52
TSPAN6	209108_at	53
COL21A1	208096_s_at	54
SLC7A11	209921_at	55
ALDH1A2	207016_s_at	56
MAPK1	208351_s_at	57
C20orf111	209020_at	58
TIMM44	203093_s_at	59
C14orf109	213246_at	60
ANKHD1	219081_at	61
SEC63	201914_s_at	62
MXRA8	213422_s_at	63
ITGB4	214292_at	64
PDLIM4	214175_x_at	65
SCML2	206147_x_at	66
F9	207218_at	67
PAX3	216059_at	68
AL042733	213473_at	69
PADI4	211412_at	70
NM_014403	220937_s_at	71
NUP98	210793_s_at	72
ABLIM3	205730_s_at	73
FLNC	207876_s_at	74
GALNT10	212256_at	75
USH1C	211184_s_at	76
SOX3	214633_at	77
PHLDB1	216019_x_at	78
ICAM4	207194_s_at	79
RGR	207070_at	80
PTBP1	211270_x_at	81
SP110	208392_x_at	82
LOC440434	215090_x_at	83
IER2	202081_at	84
AJ302559	216818_s_at	85
FLT3LG	206980_s_at	86
COBLL1	203642_s_at	87
ZPBP	207021_at	88
SAP30BP	217965_s_at	89
VCL	200930_s_at	90
GATA3	209603_at	91
CEP350	204373_s_at	92
AL049987	213605_s_at	93
NEK9	212299_at	94
SAFB2	32099_at	95
UTX	203991_s_at	96
ADAMDEC1	206134_at	97
CSNK2A2	203575_at	98
MST1R	205455_at	99
N4BP1	32069_at	100
DLG5	210469_at	101
AL080106	216121_at	102
CCDC52	215094_at	103
SIRT6	219613_s_at	104
RYBP	201846_s_at	105
LTBP1	202728_s_at	106
RHEB	213409_s_at	107
LMAN2	215656_at	108
POLR1D	218258_at	109
PDSS2	219307_at	110
C10orf76	218891_at	111
TRPC2	215288_at	112
IRF2BP1	213771_at	113
MED6	207078_at	114
ARHGAP19	212738_at	115
AP3S2	202398_at	116
PIN4	214224_s_at	117
HLA-DPA3	213870_at	118
CDC34	212540_at	119
PER2	205251_at	120
ICA1	207949_s_at	121
AKR1B1	201272_at	122
SPATA5L1	222163_s_at	123
PLA2G10	207222_at	124
HOMER3	215489_x_at	125
UTS2	220784_s_at	126
GABRA5	217280_x_at	127
RAB38	219412_at	128
TEAD1	214600_at	129
KCNC3	207600_at	130
MCAM	209086_x_at	131
NM_031269	208139_s_at	132
ZNF350	219266_at	133
GJC2	214302_x_at	134
ZNF20	213916_at	135
PAPSS2	203058_s_at	136
NM_012348	221382_at	137
OR7E12P	216698_x_at	138
IL15	205992_s_at	139
C7orf28A	201974_s_at	140
POMC	205720_at	141
CGA	204637_at	142
SFTPB	37004_at	143
GRAP	206620_at	144
NM_024934	220849_at	145
RUNX2	216994_s_at	146
CHD2	203461_at	147
H2AFB2	214412_at	148
SLC35F2	218826_at	149
PLA2R1	210194_at	150
KRTAP5-9	214517_at	151
CYP3A4	205998_x_at	152
PCGF2	203793_x_at	153
AI693193	213448_at	154
E2F3	203692_s_at	155
KRTAP5-8	208532_x_at	156
VNN2	205922_at	157
ATF5	204998_s_at	158
CHRNA9	221107_at	159
EFHC2	220523_at	160
AF053356	217450_at	161
OR52A1	221329_at	162
SFRS7	211439_at	163
PRDM2	216445_at	164
IL12B	207901_at	165
APBB3	204650_s_at	166
HOXA9	214651_s_at	167
CRP	205753_at	168
EDC4	202496_at	169
VIPR2	205947_s_at	170
ADAM30	221446_at	171
LUZP4	220665_at	172
RIBC2	206526_at	173
KCND1	206842_at	174
POMZP3	210910_s_at	175
MTSS1	210360_s_at	176
RPL28	213223_at	177
PPIE	202494_at	178
RFX2	208031_s_at	179
XYLB	208318_s_at	180
UBE2I	213536_s_at	181
FCGR2C	210992_x_at	182
S80491	216974_at	183
BTN2A2	205298_s_at	184
PURA	213806_at	185
FLJ39739	217136_at	186
TNKS	217121_at	187
PLXNB2	211472_at	188
AW851559	216056_at	189
NENF	218406_x_at	190
TRIM26	202702_at	191
SMAD3	205398_s_at	192
ULBP2	221291_at	193
BF691447	221484_at	194
DIABLO	219350_s_at	195
ALPP	211619_s_at	196
ING2	205981_s_at	197
RRAD	204803_s_at	198
MRPS12	210008_s_at	199
ITGB1	216178_x_at	200
HIST1H2AE	214469_at	201
POLDIP3	210583_at	202
WWP2	210200_at	203
AL110223	216534_at	204
TPD52	201691_s_at	205
CD72	215925_s_at	206
CASP5	207500_at	207
NUBP1	203978_at	208
PIGO	209998_at	209
CSE1L	210765_at	210
ICAM1	202637_s_at	211
CCL20	205476_at	212
NRIP2	215104_at	213
PIK3R4	216752_at	214
AF202635	211435_at	215
NCAPD2	201774_s_at	216
NUP214	202155_s_at	217
CTDSPL	201905_s_at	218
RIPK5	211514_at	219
CASP9	210775_x_at	220
TRPM3	216489_at	221
RGN	210751_s_at	222
AW408767	217608_at	223
UBE3B	213822_s_at	224
KRT19P2	217350_at	225
GNRHR2	213852_at	226
AL520908	217833_at	227
PRDM12	220894_x_at	228
U82303	216702_x_at	229
LOC646934	215572_at	230
ATP11A	215842_s_at	231
USP19	214674_at	232
RAB14	200928_s_at	233
PLEKHO2	204436_at	234
LOC441150	215492_x_at	235
SFTPC	38691_s_at	236
BC000265	209435_s_at	237
PPP2R3A	207749_s_at	238
AVPR1A	206250_x_at	239
EMR2	207610_s_at	240
KLHL24	221985_at	241
HLX	214438_at	242
TPP1	214195_at	243
IL24	206569_at	244
USP13	205356_at	245
PDE3A	206388_at	246
LGALS9	203236_s_at	247
MVK	36907_at	248
FAF1	218080_x_at	249
X87344	215536_at	250
PHF20L1	219606_at	251
GPRC5C	219327_s_at	252
KCNJ5	208397_x_at	253
WT1	206067_s_at	254
SLC22A6	216599_x_at	255
TMBIM1	217730_at	256
TRIP6	209129_at	257
ATP2A3	213036_x_at	258
SCYL2	221220_s_at	259
RNASEH2A	203022_at	260
SLC12A2	204404_at	261
DHFR	202534_x_at	262
TSPAN8	203824_at	263
DHFR	202532_s_at	264
DUSP10	221563_at	265
CLCNKB	205985_x_at	266
LRRFIP1	201862_s_at	267
CFLAR	211862_x_at	268
CNOT6	217970_s_at	269
YES1	202933_s_at	270
C3orf63	209285_s_at	271
AV712577	201305_x_at	272
ZBTB10	219312_s_at	273
PTPN11	212610_at	274
STAG1	202293_at	275
CD68	203507_at	276
TSPO	202096_s_at	277
FAM114A1	213455_at	278
CPT2	204264_at	279
FOLH1	217483_at	280
CASK	211208_s_at	281
FTH1	214211_at	282
ITGB8	205816_at	283
MBTD1	207115_x_at	284
AA554430	214964_at	285
KLHL20	204177_s_at	286
PBXIP1	214177_s_at	287
ERF	203643_at	288
X97875	217158_at	289
CSF2RA	211286_x_at	290
IRAK4	219618_at	291
AL050053	216093_at	292
LILRA4	210313_at	293
LOC643332	216667_at	294
AKAP4	207019_s_at	295
PTEN	222176_at	296
CYP3A4	210726_at	297
AK026856	216793_x_at	298
ADCY2	217687_at	299
TRH	206622_at	300
IL20RA	219115_s_at	301
PBOV1	208329_at	302
VPRBP	204376_at	303
ADAM3B	217237_at	304
MMP12	204580_at	305
UGT1A6	206094_x_at	306
MEOX2	206202_at	307
AFM	206840_at	308
PTAFR	206278_at	309
SDC1	201287_s_at	310
LOC100130958	215301_at	311
LRAT	220317_at	312
SLC6A2	217214_s_at	313
CYLC1	216778_s_at	314
DNAJA4	220395_at	315
GSTM4	210912_x_at	316
CSF1	209716_at	317
KLHL20	210635_s_at	318
SLCO2B1	203472_s_at	319
CTPS2	219080_s_at	320
AFF2	216364_s_at	321
C17orf80	221048_x_at	322
IGL@	215035_at	323
LOC647070	215467_x_at	324
PCIF1	89948_at	325
NPAL2	220128_s_at	326
GRIK3	207454_at	327
EIF4E2	213570_at	328
TTC17	218972_at	329
DHRS9	219799_s_at	330
BMX	206464_at	331
PPP1R3A	206895_at	332
SMG6	220347_at	333
SFTPC	211735_x_at	334
TNFRSF11B	204932_at	335
AF308291	216811_at	336
NM_016610	220832_at	337
IFNAR2	204785_x_at	338
PZP	207330_at	339
C21orf62	220543_at	340
X60592	35150_at	341
SLC11A1	217507_at	342
BATF	205965_at	343
YIF1A	202418_at	344
RENBP	206617_s_at	345
DDC	205311_at	346
RBCK1	221827_at	347
AK025552	216783_at	348
FPGS	202945_at	349
PAX5	206802_at	350
RUNX1	211180_x_at	351
ELF3	201510_at	352
HOMER3	204647_at	353
GCNT3	219508_at	354
TPMT	203671_at	355
LUC7L2	217842_at	356
NOTCH1	218902_at	357
EHD1	208112_x_at	358
ALMS1	214221_at	359
JMJD2B	216023_at	360
JMJD2B	212496_s_at	361
MRPS11	215919_s_at	362
CDIPT	201253_s_at	363
AI478300	217526_at	364
KLF2	219371_s_at	365
PRSS21	220051_at	366
C5orf4	48031_r_at	367
BTG3	215425_at	368
SLC12A9	220371_s_at	369
KIF13B	202962_at	370
CDC2L6	212899_at	371
QKI	212262_at	372
CLEC7A	221698_s_at	373
EFS	204400_at	374
CNDP2	217752_s_at	375
PSCD1	202880_s_at	376
ATP10B	220920_at	377
MAL	204777_s_at	378
C18orf1	209574_s_at	379
HAPLN2	220142_at	380
OR7E2P	215770_at	381
SPTLC2	203127_s_at	382
BF110411	221878_at	383
LITAF	200704_at	384
SAV1	218276_s_at	385
GCLC	202923_s_at	386
NM_015376	205801_s_at	387
AL138752	204656_at	388
PRKAR2A	204843_s_at	389
DLG1	217208_s_at	390
VANGL1	219330_at	391
FADS1	217462_at	392
CA1	205950_s_at	393
IL9R	214950_at	394
OSBPL7	210344_at	395
DLGAP2	216916_s_at	396
ACTR8	218658_s_at	397
AJ251844	216362_at	398
AU153477	202903_at	399
LOC286434	222196_at	400
SNPH	215917_at	401
HPR	208470_s_at	402
AW103265	203101_s_at	403
TRA@	209671_x_at	404
NUP98	203195_s_at	405
CDKN2D	213586_at	406
NOTCH2	202445_s_at	407
AGTR1	205357_s_at	408
TLR1	210176_at	409
MED13L	212207_at	410
KLF9	203542_s_at	411
PER1	36829_at	412
SMOX	210357_s_at	413
MAP2K3	215498_s_at	414
SPECC1L	212480_at	415
ITPK1	210197_at	416
SASH1	213236_at	417
NBPF12	213612_x_at	418
TCF7L2	212761_at	419
MTF1	205323_s_at	420
FOXO1	202724_s_at	421
SERTAD2	202656_s_at	422
FAM107A	209074_s_at	423
RND2	214393_at	424
FTL	212788_x_at	425
PAX6	205646_s_at	426
LRP10	201412_at	427
RASL12	219167_at	428
BCL2	203685_at	429
ATP6V0E1	214150_x_at	430
BG251521	213156_at	431
ZBTB20	205383_s_at	432
C6orf145	212923_s_at	433
TLE3	212769_at	434
FLJ23172	217016_x_at	435
C21orf2	203993_x_at	436
IL10RA	204912_at	437
GSTA3	222102_at	438
CTAG1A	211674_x_at	439
EPHA2	203499_at	440
LILRA5	215838_at	441
CFLAR	214486_x_at	442
NM_018612	220882_at	443
FAM50A	203262_s_at	444
FAM53B	203206_at	445
PCDHGA10	211875_x_at	446
KIR3DX1	216428_x_at	447
RGS16	209324_s_at	448
EHD1	209039_x_at	449
PHKA2	209439_s_at	450
CPT1B	210069_at	451
MXD4	210778_s_at	452
N25732	204131_s_at	453
ZBTB16	205883_at	454
JRK	37872_at	455
STAG3L1	221191_at	456
ZNF500	213639_s_at	457
PARP12	218543_s_at	458
NM_024723	219332_at	459
PISD	215699_x_at	460
AU155105	214782_at	461
BE503392	213637_at	462
H05812	203628_at	463
SOX2	213721_at	464
TUG1	222244_s_at	465
BE138647	214314_s_at	466
TNS1	221748_s_at	467
CTBP2	210835_s_at	468
TBL1X	213400_s_at	469
H2AFX	205436_s_at	470
UPF1	211168_s_at	471
CUX1	214743_at	472
AA485908	213792_s_at	473
RRAGC	218088_s_at	474
KIAA1648	213058_at	475
AI286226	54632_at	476
NFATC1	210162_s_at	477
RNF121	219021_at	478
LILRA6	208594_x_at	479
N58524	222332_at	480
DPH5	219590_x_at	481
TUBD1	210389_x_at	482
PTMS	218044_x_at	483
C1orf116	219476_at	484
U43279	211606_at	485
MMP11	203876_s_at	486
CASP4	213596_at	487
DHX32	218198_at	488
KIR2DL5A	211410_x_at	489
NKX3-1	209706_at	490
KDELR3	204017_at	491
GRM6	208035_at	492
PKP1	205724_at	493
CSF2RB	205159_at	494
MYO5C	218966_at	495
HMG20B	210719_s_at	496
STS	203768_s_at	497
CENPE	205046_at	498
MAB21L2	210302_s_at	499
AJAP1	215790_at	500
KLK3	204582_s_at	501
CAMP	210244_at	502
FCN1	205237_at	503
P53AIP1	220402_at	504
LRRC8E	220174_at	505
SPACA1	220982_s_at	506
NOTCH4	205247_at	507
ZNF669	220215_at	508
TSPAN2	214606_at	509
CSF1	211839_s_at	510
FKBP8	222007_s_at	511
SKIP	202782_s_at	512
AK026465	216790_at	513
R71245	217654_at	514
KCNJ10	206692_at	515
MAB21L1	206163_at	516
CGGBP1	214050_at	517
IGHG1	211641_x_at	518
DRD4	208215_x_at	519
AK024123	216158_at	520
SLC25A36	201917_s_at	521
INSL5	221091_at	522
TMC7	220021_at	523
REG1B	205886_at	524
C1orf46	216935_at	525
MLLT4	208512_s_at	526
TREX1	34689_at	527
CNOT1	200861_at	528
EXPH5	214734_at	529
NID1	202008_s_at	530
ESR1	205225_at	531
S67777	217190_x_at	532
CLN8	219340_s_at	533
SCGB2A1	205979_at	534
PLCE1	214159_at	535
FYCO1	218204_s_at	536
HBEGF	38037_at	537
ADARB2	220648_at	538
AL049443	215306_at	539
GTF2A1L	213413_at	540
ESRRA	203193_at	541
AL035603	217107_at	542
CYP3A4	205999_x_at	543
TTN	208195_at	544
SI	206664_at	545
NPAT	211584_s_at	546
JPH2	220385_at	547
TRBV6-4	216578_at	548
NEUROD4	221318_at	549
CD1B	206749_at	550
FBN2	203184_at	551
FETUB	214417_s_at	552
DALRD3	218808_at	553
IFIH1	216020_at	554
PTPRB	217177_s_at	555
MAPKAPK2	201461_s_at	556
COG2	203073_at	557
BTF3L3	217467_at	558
SLCO1B3	206354_at	559
C1orf116	219856_at	560
BG477502	203784_s_at	561
MCM3AP	214514_at	562
LOC645961	215320_at	563
CCIN	210642_at	564
AL049242	216101_at	565
M69039	216962_at	566
CFHR2	206910_x_at	567
BE466525	221884_at	568
TTC22	220309_at	569
CST1	206224_at	570
EIF5	208707_at	571
MED25	208110_x_at	572
IGF2	202410_x_at	573
PPARD	37152_at	574
ARHGEF10L	221656_s_at	575
SLC12A7	218066_at	576
ITGB5	201125_s_at	577
ARG2	203945_at	578
ADAM18	207597_at	579
PSMC3IP	205956_x_at	580
ATXN3L	216539_at	581
MCL1	214057_at	582
CYP3A7	211843_x_at	583
MMP11	203877_at	584
FZD5	206136_at	585
U62966	207560_at	586
FMO5	205776_at	587
CSF2	210229_s_at	588
UMOD	206716_at	589
WIPI2	214699_x_at	590
CHRNA1	211039_at	591
PHF17	218517_at	592
CGGBP1	206861_s_at	593
C4orf10	214661_s_at	594
TCF7L1	221016_s_at	595
PRL	205445_at	596
PRKD2	38269_at	597
RBM19	205115_s_at	598
FCAR	211307_s_at	599
DLG5	201681_s_at	600
NM_024849	220531_at	601
AL162044	216707_at	602
BMP4	211518_s_at	603
CYLC1	216809_at	604
FRAT1	219889_at	605
ZMYND8	214795_at	606
AJ225093	211835_at	607
TNFSF14	207907_at	608
AL359052	214927_at	609
ZNF500	213641_at	610
NM_014104	207743_at	611
NM_014163	220695_at	612
PAX8	209552_at	613
AGTR1	208016_s_at	614
CCDC130	208094_s_at	615
IGSF6	206420_at	616
X81636	216293_at	617
CNR1	208243_s_at	618
NM_017959	208145_at	619
ZNF771	221968_s_at	620
SPTB	208416_s_at	621
PI4K2A	209345_s_at	622
NTRK3	217033_x_at	623
LCE2B	207710_at	624
KIAA1659	215674_at	625
NM_021812	220772_at	626
HTN3	206786_at	627
AL050026	216626_at	628
NM_004908	208254_at	629
KIAA0415	209913_x_at	630
GABRQ	220886_at	631
C15orf39	204494_s_at	632
PSME4	212220_at	633
TEAD3	209454_s_at	634
PLXNC1	206471_s_at	635
STARD3	202991_at	636
G6PD	202275_at	637
ZNF276	213778_x_at	638
ITPR2	211360_s_at	639
DET1	219641_at	640
RIN3	222069_s_at	641
CADM4	222293_at	642
SERHL2	217276_x_at	643
AW873544	215769_at	644
CLIC5	217628_at	645
PSMB2	201404_x_at	646
CYP19A1	203475_at	647
HIST2H4A	207046_at	648
TRA@	210972_x_at	649
C16orf57	218060_s_at	650
PIP5K1A	207391_s_at	651
C4orf8	203600_s_at	652
ZNF136	206240_s_at	653
SUV39H1	218619_s_at	654
PTK6	206482_at	655
DAZAP2	214334_x_at	656
SFN	33322_i_at	657
TMPRSS5	221032_s_at	658
SLC35A3	209865_at	659
KYNU	210662_at	660
TRSPAP1	218977_s_at	661
RAMP1	204916_at	662
TBXA2R	207554_x_at	663
DNAI2	220636_at	664
POLG	217636_at	665
ITGB3	204626_s_at	666
CCL22	207861_at	667
CDK5R1	204996_s_at	668
CDH1	201130_s_at	669
PDE4D	211840_s_at	670
RNMT	202684_s_at	671
LOC90379	221851_at	672
U66059	216597_at	673
HLA-DQA1	203290_at	674
IGFBP5	211959_at	675
HRBL	222126_at	676
EWSR1	209214_s_at	677
COL8A2	52651_at	678
HLA-DPA1	213537_at	679
ERLIN2	221543_s_at	680
MATN2	202350_s_at	681
ECM2	206101_at	682
VCAM1	203868_s_at	683
WWTR1	202133_at	684
TNC	201645_at	685
MASP1	213749_at	686
USH1C	205137_x_at	687
TGFB2	209909_s_at	688
GPR64	206002_at	689
INHBA	210511_s_at	690
KCNA5	206762_at	691
LTF	202018_s_at	692
SERPINA5	209443_at	693
AV700298	217523_at	694
TGFBR3	204731_at	695
NEBL	203961_at	696
M37712	210473_s_at	697
37681	213256_at	698
TSPAN9	205665_at	699
ADD3	201753_s_at	700
MDFIC	211675_s_at	701
PTTG1IP	200677_at	702
DDAH2	202262_x_at	703
RARRES2	209496_at	704
COPZ2	219561_at	705
SCGB1D2	206799_at	706
TNKS	216695_s_at	707
CCND3	201700_at	708
BG482805	214777_at	709
DGCR11	215725_at	710
CD79B	205297_s_at	711
DPF3	219746_at	712
GEMIN6	219539_at	713
TTC22	215107_s_at	714
TRIM31	215444_s_at	715
PIK3R1	212249_at	716
FZR1	209414_at	717
GNAZ	204993_at	718
AANAT	207225_at	719
ACTL7B	220498_at	720
HNF1A	216930_at	721
DEC1	220781_at	722
TSPAN9	220968_s_at	723
CSH2	208342_x_at	724
AF043586	216394_x_at	725
KCNK5	219615_s_at	726
ARSD	206831_s_at	727
AF319573	211788_s_at	728
TMEM149	219690_at	729
C19orf50	200076_s_at	730
PPP1R12B	201958_s_at	731
SNAPC2	204104_at	732
TRIM24	204391_x_at	733
GJB5	206156_at	734
GIT2	204982_at	735
MDS1	208434_at	736
EGR1	201693_s_at	737
RPS6KB2	203777_s_at	738
MAT1A	205813_s_at	739
THOP1	203235_at	740
CHAF1A	203975_s_at	741
SYK	207540_s_at	742
CREBZF	202977_s_at	743
GTSE1	204318_s_at	744
BPI	205557_at	745
TBX4	220634_at	746
Z84723	217212_s_at	747
ZDHHC17	217486_s_at	748
PTCRA	211252_x_at	749
NM_016415	208185_x_at	750
ACSBG2	221716_s_at	751
SGK2	220357_s_at	752
SGTA	201396_s_at	753
NM_014724	206507_at	754
PIK3C3	204297_at	755
SLC22A14	207408_at	756
CDC42EP4	218063_s_at	757
IQCK	213392_at	758
MYBL1	213906_at	759
CYBRD1	217889_s_at	760
ZBTB7C	217675_at	761
M11722	210487_at	762
SPDEF	214403_x_at	763
AK024860	215406_at	764
SPAG1	210117_at	765
REM1	210300_at	766
NM_015371	207215_at	767
KCTD15	218553_s_at	768
ZNF34	219801_at	769
AL050204	213929_at	770
TNFRSF9	207536_s_at	771
CR1	206244_at	772
AKR1C4	210558_at	773
ELK3	206127_at	774
GLRA3	216021_s_at	775
NM_018546	207478_at	776
HPGD	211549_s_at	777
TBC1D5	201813_s_at	778
ADH1C	206262_at	779
GJA5	214466_at	780
TNFSF11	210643_at	781
ZNF506	221626_at	782
TNXB	216333_x_at	783
PAX8	207924_x_at	784
GATA2	210358_x_at	785
NM_025100	220726_at	786
BF431965	213567_at	787
RGS3	220300_at	788
BF510692	221969_at	789
CAPZA1P	217392_at	790
PPIL2	209299_x_at	791
ING3	205070_at	792
M78162	217536_x_at	793
RNF19A	220483_s_at	794
ZNF268	209989_at	795
ZNF395	218149_s_at	796
MKS1	218630_at	797
SEC14L2	204541_at	798
FADS1	208962_s_at	799
ST3GAL4	203759_at	800
RHBDD3	217622_at	801
NFX1	210268_at	802
C1orf89	220963_s_at	803
SAMHD1	205296_at	804
NM_018276	219919_s_at	805
AW301861	213705_at	806
RRP1B	212846_at	807
ZBTB20	222357_at	808
QKI	212636_at	809
NOTCH2NL	214722_at	810
NUCKS1	217802_s_at	811
C10orf76	55662_at	812
ZHX3	217367_s_at	813
PDCD4	212594_at	814
STAT5A	203010_at	815
PAK4	203154_s_at	816
C6orf62	208809_s_at	817
U96291	211146_at	818
AU148039	216289_at	819
AW974666	222365_at	820
HLA-E	200904_at	821
CHRNB3	217086_at	822
NM_014656	203144_s_at	823
ADAMTS6	220866_at	824
AF068863	206909_at	825
HLA-DPB1	201137_s_at	826
NRP2	219367_s_at	827
CREBBP	211808_s_at	828
AB028239	217357_at	829
CCT8L2	220508_at	830
DAPK3	203891_s_at	831
SLC34A1	217530_at	832
AGXT	210327_s_at	833
AU148611	215594_at	834
C16orf42	213105_s_at	835
RSU1	215618_at	836
MYB	215152_at	837
SAA3P	222226_at	838
SEPT6	212415_at	839
SNX11	220140_s_at	840
TBX19	206838_at	841
EIF3B	203462_x_at	842
PIAS4	212879_x_at	843
PI4KB	206138_s_at	844
NPAL3	210267_at	845
BAHD1	203051_at	846
AF009267	215908_at	847
ROBO3	219550_at	848
COMT	213981_at	849
UNC119B	202365_at	850
FGFR1	211535_s_at	851
AL042733	41512_at	852
APOH	205216_s_at	853
MFHAS1	213457_at	854
MT1L	204326_x_at	855
MT1H	206461_x_at	856
MT1F	213629_x_at	857
AF078844	210524_x_at	858
TP53I3	210609_s_at	859
PRMT2	210384_at	860
PEX11A	205160_at	861
LRRC48	208140_s_at	862
GAN	220124_at	863
UGCG	204881_s_at	864
CMKLR1	210659_at	865
CAST	212586_at	866
VNN3	220528_at	867
FGFR1OP	205588_s_at	868
CLIC5	213317_at	869
MTERFD1	219363_s_at	870
PCDH11X	210292_s_at	871
CDC27	217881_s_at	872
ECH1	200789_at	873
TOR1A	202349_at	874
MCTP1	220122_at	875
TTK	204822_at	876
GCH1	204224_s_at	877
WWP1	212637_s_at	878
GNB1L	220762_s_at	879
RAP2C	218669_at	880
SERGEF	220482_s_at	881
ITGB1	216190_x_at	882
BG546884	202551_s_at	883
PIK3R1	212240_s_at	884
HDGFRP3	209524_at	885
SMCHD1	212579_at	886
TAF2	209523_at	887
C4orf41	218179_s_at	888
TIA1	201447_at	889
RPL23A	203012_x_at	890
IRF8	204057_at	891
NM_024614	219871_at	892
USP9Y	206624_at	893
ELOVL2	213712_at	894
PIK3C2A	213070_at	895
NT5E	203939_at	896
SLC4A4	203908_at	897
LYPD1	212909_at	898
CHRDL1	209763_at	899
GPC5	207174_at	900
SLCO1C1	220460_at	901
ALDOC	202022_at	902
GABBR1	203146_s_at	903
PTN	209466_x_at	904
PTN	211737_x_at	905
NCAN	205143_at	906
CSPG5	39966_at	907
CHD3	208806_at	908
SIRT3	221562_s_at	909
PPIAL	217346_at	910
SLC35A1	203306_s_at	911
RTN1	203485_at	912
ATP2B2	216120_s_at	913
TCTE1P	204869_at	914
KIF17	222144_at	915
LRP1B	219643_at	916
C7orf43	220659_s_at	917
C16orf33	218493_at	918
PPT1	200975_at	919
FN1	211719_x_at	920
FN1	216442_x_at	921
ETV1	221911_at	922
PCP4	205549_at	923
ANKRD34C	216073_at	924
RGS4	204337_at	925
SS18L1	213140_s_at	926
SATB2	213435_at	927
SLC12A5	210040_at	928
ATP6V1D	208898_at	929
NT5DC1	212928_at	930
GABBR2	209990_s_at	931
PEG3	209242_at	932
AGPAT7	40472_at	933
EFR3A	212149_at	934
SACS	213262_at	935
CRYM	205489_at	936
C1orf115	218546_at	937
OSBPL10	219073_s_at	938
FBXW7	218751_s_at	939
PTPRR	206084_at	940
IQSEC1	203906_at	941
RPRM	219370_at	942
B3GALT2	210121_at	943
TOX	204529_s_at	944
PTPRT	205948_at	945
FSD1	219170_at	946
PTPRR	210675_s_at	947
DLX2	207147_at	948
ATP8A2	219660_s_at	949
SRF	202401_s_at	950
PEX16	221604_s_at	951
COLQ	206073_at	952
SNCG	209877_at	953
PDE4A	211901_s_at	954
DCUN1D4	212851_at	955
GDAP1L1	219668_at	956
TBCE	203715_at	957
RAPGEF4	205651_x_at	958
BBS4	212745_s_at	959
SEC31A	200945_s_at	960
NDUFB8	201226_at	961
APLP2	208704_x_at	962
ZMAT3	219628_at	963
SLC9A3R2	215735_s_at	964
FAIM2	203619_s_at	965
PPP3R1	204506_at	966
NETO2	218888_s_at	967
KIAA0368	212428_at	968
KCNAB1	210078_s_at	969
MAN1A1	221760_at	970
GOT2	200708_at	971
KPNA2	201088_at	972
WASF1	204165_at	973
PPP3CA	202457_s_at	974
FAM65B	209829_at	975
CACNG3	206384_at	976
ARNT2	202986_at	977
ATP5E	217801_at	978
COX4I1	200086_s_at	979
COX6B1	201441_at	980
TMSB10	217733_s_at	981
PCSK2	204870_s_at	982
SHANK2	213308_at	983
MKL2	218259_at	984
SORCS3	215522_at	985
ATP2B1	212930_at	986
PRKAR2B	203680_at	987
BAI3	205638_at	988
FRY	204072_s_at	989
LOC100131599	213222_at	990
MYT1L	210016_at	991
KCND2	207103_at	992
TRIM36	219736_at	993
SRD5A1	211056_s_at	994
PKP4	214874_at	995
C1orf216	212791_at	996
RGS7	206290_s_at	997
C1orf41	215691_x_at	998
ITPR1	203710_at	999
NEFM	205113_at	1000
LDB2	206481_s_at	1001
OPA1	212214_at	1002
NEFL	221805_at	1003
VSNL1	203798_s_at	1004
NRXN1	209915_s_at	1005
C3orf14	219288_at	1006
KPNA3	221502_at	1007
PPP2CA	208652_at	1008
GNAS	211858_x_at	1009
SERPINI1	205352_at	1010
SLC25A12	203340_s_at	1011
CSPG5	205344_at	1012
AV727634	213683_at	1013
BBS7	219688_at	1014
COX4I1	202698_x_at	1015
COX6A1	200925_at	1016
ZNHIT3	212544_at	1017
COX7C	213846_at	1018
ZC3H15	201595_s_at	1019
ATP5H	210149_s_at	1020
DDX1	201241_at	1021
SNRK	209481_at	1022
ATP5C1	205711_x_at	1023
ATP5C1	213366_x_at	1024
UQCRQ	201568_at	1025
NDUFV2	202941_at	1026
LDHA	200650_s_at	1027
PPIA	211765_x_at	1028
AI708767	211978_x_at	1029
BE731738	212661_x_at	1030
AF119846	210501_x_at	1031
TXNDC9	203008_x_at	1032
EIF3K	221494_x_at	1033
TXNDC9	211758_x_at	1034
PAPSS1	209043_at	1035
ATRN	212517_at	1036
DIMT1L	210802_s_at	1037
KIF2A	203087_s_at	1038
BE568134	214581_x_at	1039
JOSD3	221580_s_at	1040
CDK7	211297_s_at	1041
KIAA0528	212943_at	1042
DZIP1	204557_s_at	1043
CAPRIN2	218456_at	1044
ABAT	209460_at	1045
CD200	209582_s_at	1046
ENTPD3	206191_at	1047
MKKS	218138_at	1048
SUPT7L	201837_s_at	1049
DYNC2LI1	203762_s_at	1050
C3orf60	209177_at	1051
CCDC72	221791_s_at	1052
OTUB2	219369_s_at	1053
KIAA1012	207305_s_at	1054
AI760629	201734_at	1055
DMD	203881_s_at	1056
GNAS	212273_x_at	1057
GNAS	200981_x_at	1058
GNAS	200780_x_at	1059
LRRN3	209840_s_at	1060
PKNOX2	222171_s_at	1061
AW514267	214945_at	1062
SCN3A	210432_s_at	1063
RANBP9	202582_s_at	1064
ACTN1	208636_at	1065
SPRED2	212458_at	1066
RNPS1	207939_x_at	1067
HMGCR	202540_s_at	1068
UBP1	218082_s_at	1069
NPAS2	39549_at	1070
CTAGE5	204055_s_at	1071
USP46	203870_at	1072
R41498	212976_at	1073
FAM65A	218029_at	1074
AL162013	214781_at	1075
BAI2	204966_at	1076
LPPR2	64899_at	1077
GCAT	205164_at	1078
AI922605	211980_at	1079
KL	205978_at	1080
DOCK4	205003_at	1081
BCL11B	219528_s_at	1082
HPCA	205454_at	1083
NEUROD1	206282_at	1084
NEUROD6	220045_at	1085
PFDN1	201507_at	1086
STOML1	204701_s_at	1087
ARF5	201526_at	1088
EPB49	204505_s_at	1089
KCNAB2	203402_at	1090
CADM3	211677_x_at	1091
CA11	209726_at	1092
RNMT	202683_s_at	1093
SLC8A2	215267_s_at	1094
TNRC4	215045_at	1095
MAST3	213045_at	1096
CENTG1	215080_s_at	1097
SNN	218033_s_at	1098
KIAA0774	214961_at	1099
ITSN2	209898_x_at	1100
AI983904	221973_at	1101
R3HDM1	202754_at	1102
KIAA1107	214098_at	1103
HERC1	218306_s_at	1104
CYP26B1	219825_at	1105
PCSK1	205825_at	1106
PRPF19	203103_s_at	1107
B4GALT6	206233_at	1108
RGS4	204339_s_at	1109
ACCN1	206690_at	1110
TAGLN3	204743_at	1111
LZTS1	219042_at	1112
TUBG2	203894_at	1113
EFNB2	202668_at	1114
GRM5	214217_at	1115
USP25	220419_s_at	1116
MET	203510_at	1117
KIAA0368	212427_at	1118
F8A1	203274_at	1119
KIF21B	204411_at	1120
TMEM151B	213676_at	1121
ARF3	200734_s_at	1122
TTC9	213172_at	1123
PRKCB1	209685_s_at	1124
DUSP6	208891_at	1125
AP3S1	202442_at	1126
AL575735	221729_at	1127
SLIT2	209897_s_at	1128
AL109671	214896_at	1129
DYNC2LI1	203763_at	1130
IDS	202439_s_at	1131
PSD3	203354_s_at	1132
KIAA0319	206017_at	1133
BCL11A	219497_s_at	1134
AW242701	213411_at	1135
PLCL2	213309_at	1136
SV2B	205551_at	1137
ATP2B2	204685_s_at	1138
INA	204465_s_at	1139
RALYL	213967_at	1140
SYNGR3	205691_at	1141
CABP1	208321_s_at	1142
SEPT6	213666_at	1143
KIAA1467	213234_at	1144
CNNM1	220166_at	1145
TMEM16C	215241_at	1146
CAMKK2	212252_at	1147
TBC1D30	213913_s_at	1148
MAP3K9	213927_at	1149
RIMS2	206137_at	1150
PDHA1	200980_s_at	1151
PIP4K2C	218942_at	1152
CLIP3	212358_at	1153
PDE2A	204134_at	1154
MAP1A	203151_at	1155
AW085556	214607_at	1156
PIP5K1C	212518_at	1157
THY1	213869_x_at	1158
GRIA2	205358_at	1159
SLC4A3	205918_at	1160
SORBS2	204288_s_at	1161
CAMK1G	215161_at	1162
NDUFA3	218563_at	1163
LPHN1	219145_at	1164
ACTN1	211160_x_at	1165
RAPGEFL1	218657_at	1166
KCNQ2	205737_at	1167
RAB3B	205924_at	1168
GADD45GIP1	212891_s_at	1169
ACACA	212186_at	1170
EIF2AK1	217735_s_at	1171
FXYD6	217897_at	1172
MDH2	213333_at	1173
ATR	209902_at	1174
GRPEL1	212434_at	1175
NOLC1	211951_at	1176
NPY	206001_at	1177
SST	213921_at	1178
TAC1	206552_s_at	1179
NM_020479	208352_x_at	1180
AMFR	202203_s_at	1181
TOX3	215108_x_at	1182
TOX3	214774_x_at	1183
TOX3	216623_x_at	1184
EXDL2	218363_at	1185
RBMS1	203748_x_at	1186
C5orf30	221823_at	1187
YLPM1	214713_at	1188
PDC	211496_s_at	1189
ARL15	219842_at	1190
SIGLEC8	216327_s_at	1191
BE561479	212581_x_at	1192
PSME3	209853_s_at	1193
MAOA	212741_at	1194
BHLHB2	201170_s_at	1195
USP15	209475_at	1196
PTPN4	205171_at	1197
PTEN	211711_s_at	1198
B4GALT6	206232_s_at	1199
CDH10	220115_s_at	1200
AKAP12	210517_s_at	1201
NPAS2	205459_s_at	1202
ATP2B4	212135_s_at	1203
NRG1	206343_s_at	1204
MRPL16	217980_s_at	1205
NUFIP1	205136_s_at	1206
UGCGL2	218801_at	1207
MTHFD1	202309_at	1208
UFM1	218050_at	1209
CNPY2	202857_at	1210
NME2	201268_at	1211
COX7AP2	217249_x_at	1212
CADPS2	219572_at	1213
CALM3	200622_x_at	1214
FAR2	220615_s_at	1215
ACO2	200793_s_at	1216
NDUFA10	217860_at	1217
SLC25A6	212826_s_at	1218
DOPEY1	213271_s_at	1219
DYNC1H1	211928_at	1220
EDF1	209059_s_at	1221
C6orf162	213312_at	1222
CTBP1	203392_s_at	1223
DCLRE1A	209804_at	1224
RP11-336K24.9	218291_at	1225
FGGY	219718_at	1226
tcag7.1314	213142_x_at	1227
PRC1	218009_s_at	1228
SLC6A1	205152_at	1229
GLOD4	209092_s_at	1230
SLC30A9	202614_at	1231
MRCL3	201318_s_at	1232
SYNCRIP	209025_s_at	1233
ABCE1	201873_s_at	1234
ENSA	202596_at	1235
LETMD1	207170_s_at	1236
YWHAZ	200639_s_at	1237
TIMM23	218118_s_at	1238
FKBP3	218003_s_at	1239
PPP2R2B	213849_s_at	1240
FBXO3	218432_at	1241
RNF11	208924_at	1242
PRKCI	213518_at	1243
SCFD1	215548_s_at	1244
AF307080	209867_s_at	1245
PBX1	212148_at	1246
ASTN1	213197_at	1247
GPM6A	209470_s_at	1248
CRYZ	202950_at	1249
PTPRN2	203030_s_at	1250
CDH11	207172_s_at	1251
SUPT4H1	201484_at	1252
HMGN4	202579_x_at	1253
SLC1A4	209611_s_at	1254
RSU1	201980_s_at	1255
R60866	212330_at	1256
CLDN10	205328_at	1257
FSTL1	208310_s_at	1258
RPL31	200963_x_at	1259
ETFA	201931_at	1260
NM_018069	218827_s_at	1261
ACYP2	206833_s_at	1262
WDFY3	212598_at	1263
ADK	204119_s_at	1264
NM_005758	206809_s_at	1265
NRXN1	216096_s_at	1266
ISCA1	209274_s_at	1267
ARMCX2	203404_at	1268
DR1	209187_at	1269
SH3YL1	204019_s_at	1270
MINPP1	209585_s_at	1271
NM_006276	201129_at	1272
AP2B1	200615_s_at	1273
BICD2	212702_s_at	1274
MARS	201475_x_at	1275
RBM4	200997_at	1276
CEPT1	219375_at	1277
DENND4A	214787_at	1278
MPHOSPH10	212885_at	1279
RANBP2	201713_s_at	1280
YIPF3	216338_s_at	1281
CSNK1G3	220768_s_at	1282
DOK4	207747_s_at	1283
KLRA1	207229_at	1284
BCAP29	205084_at	1285
AL523275	213710_s_at	1286
GLUD2	215794_x_at	1287
GLUD1	200946_x_at	1288
ASPH	210896_s_at	1289
ITGA6	215177_s_at	1290
HLA-B	208729_x_at	1291
NDRG2	214279_s_at	1292
U08626	217202_s_at	1293
RBM5	201394_s_at	1294
CCDC131	213065_at	1295
PARP1	208644_at	1296
MACF1	208633_s_at	1297
GPR17	215225_s_at	1298
ITM2A	202746_at	1299
ABCB1	209994_s_at	1300
HSD17B6	37512_at	1301
RGS5	209070_s_at	1302
IFI27	202411_at	1303
RANBP9	202583_s_at	1304
RPS24P2	217188_s_at	1305
ACAD8	221669_s_at	1306
PDIA6	207668_x_at	1307
AA502643	213655_at	1308
RBX1	218117_at	1309
UBA3	209115_at	1310
DYNC1I2	211684_s_at	1311
HNRPDL	212454_x_at	1312
ARID5B	212614_at	1313
RB1CC1	202033_s_at	1314
AL536319	212606_at	1315
CASP8AP2	222201_s_at	1316
HIGD1B	219719_at	1317
DDX18	208897_s_at	1318
SMU1	218393_s_at	1319
HBB	217232_x_at	1320
HBB	209116_x_at	1321
HBG2	213515_x_at	1322
SLC23A2	209237_s_at	1323
FXR2	35265_at	1324
MASP2	216968_at	1325
KANK2	221068_at	1326
DLGAP4	202570_s_at	1327
NM_018601	220880_at	1328
RAB35	205461_at	1329
RFXAP	208492_at	1330
ALG8	203545_at	1331
FASTKD3	219200_at	1332
FRG1B	215160_x_at	1333
ALDH8A1	220148_at	1334
C6orf106	217924_at	1335
C20orf19	219961_s_at	1336
TNNC2	205388_at	1337
FBXO31	219785_s_at	1338
UBE2B	202334_s_at	1339
CCDC6	204716_at	1340
GNA14	220108_at	1341
NPAS1	216975_x_at	1342
ProSAPiP1	204447_at	1343
C1orf21	221272_s_at	1344
MGLL	211026_s_at	1345
WFDC1	219478_at	1346
DLX2	215685_s_at	1347
IFNGR2	201642_at	1348
ADORA2B	205891_at	1349
TRIB1	202241_at	1350
DIO2	203700_s_at	1351
DDN	214788_x_at	1352
AI201594	43511_s_at	1353
BZRAP1	205839_s_at	1354
MEG3	212732_at	1355
DBNDD1	222234_s_at	1356
LL22NC03-75B3.6	221901_at	1357
HS3ST2	219697_at	1358
LL22NC03-75B3.6	52837_at	1359
OCA2	206498_at	1360
AF070547	215972_at	1361
ZNF142	204474_at	1362
IMP4	212411_at	1363
FAM32A	201863_at	1364
HYOU1	200825_s_at	1365
SHANK2	213307_at	1366
LZTS1	47550_at	1367
B4GALNT1	206435_at	1368
CSGlcA-T	55093_at	1369
HTR2A	211616_s_at	1370
GRIP2	216481_at	1371
AF118091	208849_at	1372

## Sheet: CSF1
CSF1	209716_at	0.000143448	0.00026616	0.000273464	0.000285631	0.000226233	0.000540186	0.000456645	0.000373012	0.00033137	0.00054366	0.000319485	0.000442065	0.000435612	0.000272417	0.000331922	0.00041952	0.000441488	0.000768911	0.000408266	0.000898394	0.000521865	0.000237741	0.000431375	0.000475164	0.000553147	0.0010371	0.000573416	0.000616455	0.000999916	0.000455559	0.000704425			CSF1	Hs.591402	Colony stimulating factor 1 (macrophage)	||CSF1||MCSF||MGC31930||COLONY-STIMULATING FACTOR 1||COLONY-STIMULATING FACTOR, MACROPHAGE-SPECIFIC||macrophage colony stimulating factor||Colony stimulating factor 1 (macrophage)||colony stimulating factor 1 isoform a precursor||colony stimulating factor 1 isoform c precursor||colony stimulating factor 1 isoform b precursor||	1435	NM_000757	NP_757351	1	1p21-p13	The protein encoded by this gene is a cytokine that controls the production, differentiation, and function of macrophages. The active form of the protein is found extracellularly as a disulfide-linked homodimer, and is thought to be produced by proteolytic cleavage of membrane-bound precursors. The encoded protein may be involved in development of the placenta. Four transcript variants encoding t…	molecular function|cytokine activity|IDA|GO:0005125|GOA|10652277//molecular function|macrophage colony stimulating factor receptor binding|TAS|GO:0005157|GOA|2460758//molecular function|protein homodimerization activity|IDA|GO:0042803|GOA|3264878//biological process|cell differentiation|NAS|GO:0030154|GOA|1791839//biological process|hemopoiesis|NAS|GO:0030097|GOA|1791839//biological process|monoc…		granulocyte/macrophage colony-stimulating factors are cytokines that act in hematopoiesis by controlling the production, differentiation, and function of 2 related white cell populations of the blood, the granulocytes and the monocytes-macrophages. csf- 1 induces cells of the monocyte/macrophage lineage. it plays a role in immunological defenses, bone metabolism, lipoproteins clearance, fertility…	processed macrophage colony-stimulating factor 1: secreted, extracellular space (by similarity).
CSF1	211839_s_at	1.12601e-05	7.23176e-06	1.51752e-05	1.33078e-05	1.17306e-05	1.2699e-05	1.2977e-05	1.43678e-05	1.16782e-05	8.7919e-06	2.11013e-05	1.44663e-05	2.58342e-05	8.5237e-06	1.64873e-05	1.96222e-05	2.10953e-05	1.13313e-05	1.82648e-05	2.48018e-05	2.01958e-05	1.80463e-05	1.79123e-05	2.2847e-05	2.18348e-05	4.16177e-05	1.88484e-05	2.52965e-05	3.86068e-05	3.00097e-05	4.27464e-05			CSF1	Hs.591402	Colony stimulating factor 1 (macrophage)	||CSF1||MCSF||MGC31930||COLONY-STIMULATING FACTOR 1||COLONY-STIMULATING FACTOR, MACROPHAGE-SPECIFIC||macrophage colony stimulating factor||Colony stimulating factor 1 (macrophage)||colony stimulating factor 1 isoform a precursor||colony stimulating factor 1 isoform c precursor||colony stimulating factor 1 isoform b precursor||	1435	NM_000757	NP_757351	1	1p21-p13	The protein encoded by this gene is a cytokine that controls the production, differentiation, and function of macrophages. The active form of the protein is found extracellularly as a disulfide-linked homodimer, and is thought to be produced by proteolytic cleavage of membrane-bound precursors. The encoded protein may be involved in development of the placenta. Four transcript variants encoding t…	molecular function|cytokine activity|IDA|GO:0005125|GOA|10652277//molecular function|macrophage colony stimulating factor receptor binding|TAS|GO:0005157|GOA|2460758//molecular function|protein homodimerization activity|IDA|GO:0042803|GOA|3264878//biological process|cell differentiation|NAS|GO:0030154|GOA|1791839//biological process|hemopoiesis|NAS|GO:0030097|GOA|1791839//biological process|monoc…		granulocyte/macrophage colony-stimulating factors are cytokines that act in hematopoiesis by controlling the production, differentiation, and function of 2 related white cell populations of the blood, the granulocytes and the monocytes-macrophages. csf- 1 induces cells of the monocyte/macrophage lineage. it plays a role in immunological defenses, bone metabolism, lipoproteins clearance, fertility…	processed macrophage colony-stimulating factor 1: secreted, extracellular space (by similarity).

## Sheet: PAX6-QKI
PAX6	205646_s_at	0.000436132	0.000565257	0.000547238	0.000582053	0.000639136	0.0007094	0.000684519	0.000898181	0.00089006	0.000768784	0.00110947	0.0007968	0.000973246	0.00111524	0.00111913	0.0013709	0.00128512	0.00119098	0.00116753	0.000786032	0.00106511	0.00141694	0.0020549	0.000623625	0.00180977	0.00199959	0.00192342	0.00145215	0.00265927	0.00263886	0.00249245			PAX6	Hs.591993	Paired box 6	||PAX6||Paired box 6||paired box gene 6 (aniridia, keratitis)||	5080	NM_000280	NP_001595	11	11p13	This gene encodes paired box gene 6, one of many human homologs of the Drosophila melanogaster gene prd. In addition to the hallmark feature of this gene family, a conserved paired box domain, the encoded protein also contains a homeo box domain. Both domains are known to bind DNA, and function as regulators of gene transcription. This gene is expressed in the developing nervous system, and in de…	molecular function|protein binding|IPI|GO:0005515|GOA|16098226//molecular function|sequence-specific DNA binding|IEA|GO:0043565|GOA|na//molecular function|transcription factor activity|TAS|GO:0003700|GOA|ARRAY(0x9067498)//biological process|cell differentiation|IEA|GO:0030154|GOA|na//biological process|central nervous system development|TAS|GO:0007417|GOA|10747901//biological process|eye developm…		transcription factor with important functions in the development of the eye, nose, central nervous system and pancreas. required for the differentiation of pancreatic islet alpha cells (by similarity). competes with pax4 in binding to a common element in the glucagon, insulin and somatostatin promoters. regulates specification of the ventral neuron subtypes by establishing the correct progenitor …	nucleus.
QKI	212636_at	0.00441381	0.00365031	0.00492166	0.00465107	0.00501961	0.00629039	0.00595296	0.00656371	0.0068737	0.00591255	0.00562904	0.00851781	0.00748995	0.00814678	0.00726212	0.0110286	0.00601296	0.010342	0.0117494	0.0059262	0.00970186	0.00760972	0.0104519	0.0123784	0.00841656	0.00898028	0.00884866	0.0111297	0.0120309	0.0129086	0.0159603			QKI	In multiple clusters

[truncated: 1 more sheets: Metal related]
